# Supplementary material for: The Fossil Lithistida Collection at the Natural History Museum, London (UK)
Source: Biodivers Data J. 2022 Aug 24;10:e87106. doi: 10.3897/BDJ.10.e87106 (PMC9848467; doi:10.3897/BDJ.10.e87106)
Supplement: Supplementary material 1 — Fossil Lithistida Collection Dataset [file bdj-10-e87106-s001.csv]

_id	Registration number	Number of items with the same registration number	Type of specimen	Individual Description	Previous registration number	Type of previous registration	Taxon	Figured/ Type/Referred	Site	Stratigraphy	Acquisition Source	Acquisition Method	Publication1	Publication2	Publication3
1	NHMUK PI P 3574	4	hand specimen				Bolospongia globata Hinde, 1884		Flamborough, Yorkshire, England, United Kingdom	Cretaceous, Chalk Group, Upper Chalk	LEE, John Edward Collection, October 1885	Presented
2	NHMUK PI P 3569	1	hand specimen				Bolospongia globata Hinde, 1884		Flamborough, Yorkshire, England, United Kingdom	Cretaceous, Chalk Group, Upper Chalk	LEE, John Edward Collection, October 1885	Presented
3	NHMUK PI S 8005	1	hand specimen				Bolospongia globata Hinde, 1884		Flamborough, Yorkshire, England, United Kingdom	Cretaceous, Chalk Group, Upper Chalk	LEE, John Edward Collection, October 1885	Presented
4	NHMUK PI S 10036	1	hand specimen		12992	BM(NH) number	Bolospongia globata Hinde, 1884		Sewerby-Dane's Dyke, Yorkshire, England United Kingdom	Cretaceous, Chalk Group, Upper Chalk, Senonian	WRIGHT, Claud William, Collection [1933]	Presented
5	NHMUK PI S 10037	1	hand specimen		12992	BM(NH) number	Bolospongia globata Hinde, 1884		Sewerby-Dane's Dyke, Yorkshire, England United Kingdom	Cretaceous, Chalk Group, Upper Chalk, Senonian	WRIGHT, Claud William, Collection [1933]	Presented
6	NHMUK PI S 10038	1	hand specimen		12992	BM(NH) number	Bolospongia globata Hinde, 1884		Sewerby-Dane's Dyke, Yorkshire, England United Kingdom	Cretaceous, Chalk Group, Upper Chalk, Senonian	WRIGHT, Claud William, Collection [1933]	Presented
7	NHMUK PI S 10040	1	hand specimen		9417	BM(NH) number	Bolospongia globata Hinde, 1884		Sewerby-Dane's Dyke, Yorkshire, England United Kingdom	Cretaceous, Chalk Group, Upper Chalk, Senonian	WRIGHT, Claud William, Collection [1933]	Presented
8	NHMUK PI S 10039	1	hand specimen		9416	BM(NH) number	?Bolospongia Hinde, 1883		Sewerby-Dane's Dyke, Yorkshire, England United Kingdom	Cretaceous, Chalk Group, Upper Chalk, Senonian	WRIGHT, Claud William, Collection [1933]	Presented
9	NHMUK PI P 1470 (1)	9	hand specimen				Bolospongia globata Hinde, 1884	Figured	Flamborough, Yorkshire, England, United Kingdom	Cretaceous, Chalk Group, Upper Chalk	History unrecorded		Hinde, G.J. 1884. Catalogue of the Fossil Sponges in the Geological Department of the British Museum (Natural History). With descriptions of new and little-known species. BM(NH), London, 248 pp. (on pl.17, figs. 1 & 1a)
10	NHMUK PI S 8006	1	hand specimen				Bolospongia globata Hinde, 1884		Flamborough, Yorkshire, England, United Kingdom	Cretaceous, Chalk Group, Upper Chalk	ROWE, Arthur Walter, Nov 1926	Purchased
11	NHMUK PI S 8007	1	hand specimen				Bolospongia globata Hinde, 1884		Flamborough, Yorkshire, England, United Kingdom	Cretaceous, Chalk Group, Upper Chalk	ROWE, Arthur Walter, Nov 1926	Purchased
12	NHMUK PI S 8008	1	hand specimen				Bolospongia globata Hinde, 1884		Flamborough, Yorkshire, England, United Kingdom	Cretaceous, Chalk Group, Upper Chalk	ROWE, Arthur Walter, Nov 1926	Purchased
13	NHMUK PI S 8009	1	hand specimen				Bolospongia globata Hinde, 1884		Flamborough, Yorkshire, England, United Kingdom	Cretaceous, Chalk Group, Upper Chalk	ROWE, Arthur Walter, Nov 1926	Purchased
14	NHMUK PI S 8010	1	hand specimen				Bolospongia globata Hinde, 1884		Flamborough, Yorkshire, England, United Kingdom	Cretaceous, Chalk Group, Upper Chalk	ROWE, Arthur Walter, Nov 1926	Purchased
15	NHMUK PI S 8011	1	hand specimen				Bolospongia globata Hinde, 1884		Flamborough, Yorkshire, England, United Kingdom	Cretaceous, Chalk Group, Upper Chalk	ROWE, Arthur Walter, Nov 1926	Purchased
16	NHMUK PI S 8012	1	hand specimen				Bolospongia globata Hinde, 1884		Flamborough, Yorkshire, England, United Kingdom	Cretaceous, Chalk Group, Upper Chalk	ROWE, Arthur Walter, Nov 1926	Purchased
17	NHMUK PI S 8013	1	hand specimen				Bolospongia globata Hinde, 1884		Flamborough, Yorkshire, England, United Kingdom	Cretaceous, Chalk Group, Upper Chalk	ROWE, Arthur Walter, Nov 1926	Purchased
18	NHMUK PI S 8014	1	hand specimen				Bolospongia globata Hinde, 1884		Flamborough, Yorkshire, England, United Kingdom	Cretaceous, Chalk Group, Upper Chalk	ROWE, Arthur Walter, Nov 1926	Purchased
19	NHMUK PI S 8015	1	hand specimen				Bolospongia globata Hinde, 1884		Flamborough, Yorkshire, England, United Kingdom	Cretaceous, Chalk Group, Upper Chalk	ROWE, Arthur Walter, Nov 1926	Purchased
20	NHMUK PI P 1502	2	hand specimen				Polyierea (Thecosiphonia) turbinata Hinde, 1884	Holotype	Flamborough, Yorkshire, England, United Kingdom	Cretaceous, Chalk Group, Upper Chalk	MANTELL, Gideon Algernon, 1839	Purchased	Hinde, G.J. 1884. Catalogue of the Fossil Sponges in the Geological Department of the British Museum (Natural History). With descriptions of new and little-known species. BM(NH), London, 248 pp. (on pl.17, fig.4)
21	NHMUK PI S 6206	1	hand specimen				Bolospongia constricta Hinde, 1884		Flamborough, Yorkshire, England, United Kingdom	Cretaceous, Chalk Group, Lower Senonian	WRIGHT, Claud William, Collection [1933]	Presented
22	NHMUK PI S 6205	1	hand specimen				Bolospongia constricta Hinde, 1884		Flamborough, Yorkshire, England, United Kingdom	Cretaceous, Chalk Group, Lower Senonian	WRIGHT, Claud William, Collection [1933]	Presented
23	NHMUK PI S 10034	1	hand specimen		17817	BM(NH) number	Bolospongia globata Hinde, 1884		Sewerby-Dane's Dyke, Yorkshire, England United Kingdom	Cretaceous, Chalk Group, Upper Chalk, Senonian	WRIGHT, Claud William, Collection [1933]	Presented
24	NHMUK PI S 10035	1	hand specimen		17815	BM(NH) number	Bolospongia globata Hinde, 1884		Sewerby-Dane's Dyke, Yorkshire, England United Kingdom	Cretaceous, Chalk Group, Upper Chalk, Senonian	WRIGHT, Claud William, Collection [1933]	Presented
25	NHMUK PI P 1471	2	hand specimen				Bolospongia globata Hinde, 1884	Holotype	Flamborough, Yorkshire, England, United Kingdom	Cretaceous, Chalk Group, Upper Chalk	BEAN, William, 1859	Purchased	Hinde, G.J. 1884. Catalogue of the Fossil Sponges in the Geological Department of the British Museum (Natural History). With descriptions of new and little-known species. BM(NH), London, 248 pp. (on pl.17, figs. 2 & 2a)
26	NHMUK PI S 1903	2	hand specimen				Callopegma obconicum Hinde, 1884		South Downs, England, United Kingdom	Cretaceous, Chalk Group, Upper Chalk	ROBINSON, D., 20 Dec 1922	Donated
27	NHMUK PI P 4462	4	hand specimen				Callopegma obconicum Hinde, 1884		Bournemouth, Dorset, England, United Kingdom	Cretaceous, Chalk Group	ELWES, Capt. G. R.
28	NHMUK PI P 1327	2	hand specimen				?Callopegma Zittel, 1878		Brighton, Sussex, England, United Kingdom	Cretaceous, Chalk Group, Upper Chalk	SMITH, Joshua Toulmin, 1869	Purchased
29	NHMUK PI S 4880	1	hand specimen				Callopegma obconicum Hinde, 1884		Covehithe, Suffolk, England, United Kingdom	Cretaceous, Chalk Group, Upper Chalk, Senonian	GRUBBE, R. H., collected in 1881, bequest by GRUBBE, Miss M. J. M., 1939	Bequest
30	NHMUK PI S 7441	2	hand specimen				?Callopegma Zittel, 1878		East Dean, Sussex, England, United Kingdom	Cretaceous, Chalk Group, Upper Chalk	METCALFE, H. F., May 1953	Donated
31	NHMUK PI P 1334	10	hand specimen				Callopegma obconicum Hinde, 1884		Beckham place, Norwich, England	Cretaceous, Chalk Group, Upper Chalk	CUNNINGTON Collection	Purchased
32	NHMUK PI S 9686	2	hand specimen				?Callopegma Zittel, 1878		Warningcamp, Sussex, England, United Kingdom	Cretaceous, Chalk Group, Upper Chalk, Senonian	GASTER, Christopher Theodore Augustine, Collection	Presented
33	NHMUK PI P 1332	6	hand specimen				Callopegma obconicum Hinde, 1884		Beckham place, Norwich, England	Cretaceous, Chalk Group, Upper Chalk	CUNNINGTON Collection	Purchased
34	NHMUK PI S 9995	1	hand specimen				?Callopegma Zittel, 1878		Beacon Hill, Bulford, Wiltshire, England, United Kingdom	Cretaceous, Chalk Group, Upper Chalk, Senonian	WRIGHT, Claud William, Collection [1933]	Presented
35	NHMUK PI S 9996	1	hand specimen				?Callopegma Zittel, 1878		Beacon Hill, Bulford, Wiltshire, England, United Kingdom	Cretaceous, Chalk Group, Upper Chalk, Senonian	WRIGHT, Claud William, Collection [1933]	Presented
36	NHMUK PI S 9731	1	hand specimen				?Callopegma Zittel, 1878		Hangleton, Sussex, England, United Kingdom	Cretaceous, Chalk Group, Upper Chalk, Senonian	GASTER, Christopher Theodore Augustine, Collection	Presented
37	NHMUK PI S 9732	1	hand specimen				?Callopegma Zittel, 1878		Hangleton, Sussex, England, United Kingdom	Cretaceous, Chalk Group, Upper Chalk, Senonian	GASTER, Christopher Theodore Augustine, Collection	Presented
38	NHMUK PI S 9691	5	hand specimen				?Callopegma Zittel, 1878		Lower Bannings, Saltdean, Sussex, England United Kingdom	Cretaceous, Chalk Group, Upper Chalk, Senonian	GASTER, Christopher Theodore Augustine, Collection	Presented
39	NHMUK PI P 1333	1	hand specimen				Callopegma obconicum Hinde, 1884		Beckham place, Norwich, England	Cretaceous, Chalk Group, Upper Chalk	BROWN, J.	Presented
40	NHMUK PI S 4541	1	hand specimen				Callopegma obconicum Hinde, 1884	Figured	Bournemouth, Dorset, England, United Kingdom	Cretaceous, Chalk Group	ELWES, Capt. G. R.		Oakley, K.P. 1937. Cretaceous sponges: some biological and geological considerations. Proceedings of the Geologists' Association, 48: 330-348. (on pl. 32, fig. 8)
41	NHMUK PI S 4228	1	hand specimen				Callopegma obconicum Hinde, 1884	Figured	High Salvington, Worthing, West Sussex, England, United Kingdom	Cretaceous, Chalk Group, Upper Chalk	LANG, William D., 11 Nov 1936	Presented	Oakley, K.P. 1937. Cretaceous sponges: some biological and geological considerations. Proceedings of the Geologists' Association, 48: 330-348. (on pl. 32, fig. 7)
42	NHMUK PI S 8710	2	hand specimen		P 1334	BM(NH) number	Callopegma obconicum Hinde, 1884	Figured	South of England	Cretaceous, Chalk Group, Upper Chalk	History unrecorded		Hinde, G.J. 1884. Catalogue of the Fossil Sponges in the Geological Department of the British Museum (Natural History). With descriptions of new and little-known species. BM(NH), London, 248 pp. (on pl.11, figs. 3a & 3b)
43	NHMUK PI S 8709	1	hand specimen		P 1334	BM(NH) number	Callopegma obconicum Hinde, 1884	Figured	South of England	Cretaceous, Chalk Group, Upper Chalk	History unrecorded		Hinde, G.J. 1884. Catalogue of the Fossil Sponges in the Geological Department of the British Museum (Natural History). With descriptions of new and little-known species. BM(NH), London, 248 pp. (on pl.11, fig. 3)
44	NHMUK PI P 9462	1	hand specimen				Callopegma obconicum Hinde, 1884	Figured	Bournemouth, Dorset, England, United Kingdom	Cretaceous, Chalk Group, Upper Chalk	History unrecorded		Rigby, J.K. & Scrutton, C.T. 1985. Sponges, chaetetids and stromatoporoids. In Murray, J.W. (ed.), Atlas of Invertebrate Macrofossils. Longman, London, pp. 3-10. (on p. 8, fig. 2.2, 7a, 7b)
45	NHMUK PI S 4224	1	hand specimen				Callopegma obconicum Hinde, 1884		Woodford Green, Essex, England, United Kingdom	Cretaceous, Chalk Group, Upper Chalk	COMPTON, J. C., 24 Feb 1936
46	NHMUK PI P 1330	1	hand specimen				Callopegma obconicum Hinde, 1884		Brighton, Sussex, England, United Kingdom	Cretaceous, Chalk Group, Upper Chalk	MANTELL, Gideon Algernon, 1839	Purchased
47	NHMUK PI S 7000	1	hand specimen				Callopegma obconicum Hinde, 1884		Flamborough, Yorkshire, England, United Kingdom	Cretaceous, Chalk Group, Upper Chalk, Senonian	OAKLEY, Dr. K. P., Dec 1950	Donated
48	NHMUK PI P 3536	2	hand specimen				?Callopegma Zittel, 1878		Ventnor, Isle of Wight, England, United Kingdom	Cretaceous, Lower Chalk, Chalk Marl	LEE, John Edward Collection, October 1885	Presented
49	NHMUK PI P 1328 (1)	1	hand specimen				?Callopegma Zittel, 1878		Brighton, Sussex, England, United Kingdom	Cretaceous, Chalk Group, Upper Chalk	History unrecorded
50	NHMUK PI S 9107	1	hand specimen				Callopegma obconicum Hinde, 1884		Brighton, Sussex, England, United Kingdom	Cretaceous, Chalk Group, Upper Chalk	HINDE, Dr. George Jennings	Presented
51	NHMUK PI S 9997	1	hand specimen		14605	BM(NH) number	Callopegma obconicum Hinde, 1884		Bulford, Wiltshire, England, United Kingdom	Cretaceous, Chalk Group, Upper Chalk, Senonian	WRIGHT, Claud William, Collection [1933]	Presented
52	NHMUK PI S 9998	1	hand specimen		14432	BM(NH) number	Callopegma obconicum Hinde, 1884		West Harnham, Wiltshire, England, United Kingdom	Cretaceous, Chalk Group, Upper Chalk, Senonian	WRIGHT, Claud William, Collection [1933]	Presented
53	NHMUK PI S 9999	1	hand specimen		14626	BM(NH) number	Callopegma obconicum Hinde, 1884		Upper Woodford, Wiltshire, England, United Kingdom	Cretaceous, Chalk Group, Upper Chalk, Senonian	WRIGHT, Claud William, Collection [1933]	Presented
54	NHMUK PI S 7566	1	hand specimen				Callopegma obconicum Hinde, 1884		Near Salisbury, Wiltshire, England, United Kingdom	Cretaceous, Chalk Group, Upper Chalk	BLACKMORE, Dr. H. P., Trustees, Salisbury Museum, Jan 1935
55	NHMUK PI S 7784	1	hand specimen				?Callopegma Zittel, 1878		Downend, Wroxall Down, Isle of Wight, England, United Kingdom	Cretaceous, Chalk Group, Upper Chalk	ROWE, Arthur Walter, Nov 1926	Purchased
56	NHMUK PI S 10000	1	hand specimen		13396	BM(NH) number	?Callopegma Zittel, 1878		Kiplingcotes, Yorkshire, England, United Kingdom	Cretaceous, Chalk Group, Upper Chalk, Turonian	WRIGHT, Claud William, Collection [1933]	Presented
57	NHMUK PI S 9727	1	hand specimen				?Callopegma Zittel, 1878		Withdean, Brighton, Sussex, England, United Kingdom	Cretaceous, Chalk Group, Upper Chalk, Senonian	GASTER, Christopher Theodore Augustine, Collection	Presented
58	NHMUK PI S 10001	1	hand specimen		7868	BM(NH) number	?Callopegma Zittel, 1878		East Leys, Yorkshire, England, United Kingdom	Cretaceous, Chalk Group, Upper Chalk, Senonian	WRIGHT, Claud William, Collection [1933]	Presented
59	NHMUK PI S 7691	1	hand specimen				Callopegma obconicum Hinde, 1884		Middleton Beach, Bognor Regis, Sussex, England, United Kingdom	Cretaceous, Chalk Group, Upper Chalk	TURNER, J. G., Collection, Mrs. Turner	Presented
60	NHMUK PI S 9723	1	hand specimen				?Callopegma Zittel, 1878		Waterpit Hill, Balmer, Falmer, Sussex, England, United Kingdom	Cretaceous, Chalk Group, Upper Chalk, Senonian	GASTER, Christopher Theodore Augustine, Collection	Presented
61	NHMUK PI S 3699	1	hand specimen				Callopegma obconicum Hinde, 1884		Barton, Hampshire, England, United Kingdom	Cretaceous, Chalk Group, Upper Chalk	LINTON, Maj. E. C., Aug 1932
62	NHMUK PI S 180	1	hand specimen				Callopegma obconicum Hinde, 1884		Kempston, Bedfordshire, England, United Kingdom	Cretaceous, Chalk Group, Upper Chalk	CRICK, G. C., 22 Feb 1910	Donated
63	NHMUK PI S 5408	1	hand specimen				Callopegma obconicum Hinde, 1884		Bournemouth, Dorset, England, United Kingdom	Cretaceous, Chalk Group, Upper Chalk	STINTON, F.C., Mar. 1947	Presented
64	NHMUK PI S 5409	1	hand specimen				Callopegma obconicum Hinde, 1884		Bournemouth, Dorset, England, United Kingdom	Cretaceous, Chalk Group, Upper Chalk	STINTON, F.C., Mar. 1947	Presented
65	NHMUK PI S 8331	1	hand specimen				?Callopegma Zittel, 1878		Brighton, Sussex, England, United Kingdom	Cretaceous, Chalk Group	CAMBRIDGE, Sgt. P., Feb 1962
66	NHMUK PI S 9096	1	hand specimen				?Callopegma Zittel, 1878		Ventnor, Isle of Wight, England, United Kingdom	Cretaceous, Cenomanian	HINDE, Dr. George Jennings	Presented
67	NHMUK PI P 1328 (2)	1	hand specimen				Callopegma obconicum Hinde, 1884		Brighton, Sussex, England, United Kingdom	Cretaceous, Chalk Group, Upper Chalk	History unrecorded
68	NHMUK PI S 10004	1	hand specimen		14778	BM(NH) number	?Callopegma Zittel, 1878		Woll.	Cretaceous, Chalk Group, Upper Chalk, Senonian	WRIGHT, Claud William, Collection [1933]	Presented
69	NHMUK PI S 10002	1	hand specimen		3112	BM(NH) number	?Callopegma Zittel, 1878		Whitecliff, Seaton, Devon, England, United Kingdom	Cretaceous, Cenomanian	WRIGHT, Claud William, Collection [1933]	Presented
70	NHMUK PI P 3572	2	hand specimen				Callopegma obconicum Hinde, 1884		Flamborough, Yorkshire, England, United Kingdom	Cretaceous, Chalk Group, Upper Chalk	LEE, John Edward Collection, October 1885	Presented
71	NHMUK PI P 1322	1	hand specimen				Callopegma ficoideum Hinde, 1884	Figured	Guildford, Surrey, England, United Kingdom	Cretaceous, Chalk Group, Upper Chalk	History unrecorded		Hinde, G.J. 1884. Catalogue of the Fossil Sponges in the Geological Department of the British Museum (Natural History). With descriptions of new and little-known species. BM(NH), London, 248 pp. (on pl.11, figs. 4, 4a, 4b)
72	NHMUK PI P 1337	1	hand specimen				Callopegma ficoideum Hinde, 1884		Krakan	Cretaceous, Chalk Group, Upper Chalk	ZITTEL, Karl Alfred von Collection
73	NHMUK PI P 1325	1	hand specimen				Callopegma ficoideum Hinde, 1884		Beckhampton, Wiltshire, England, United Kingdom	Cretaceous, Chalk Group, Upper Chalk	CUNNINGTON Collection	Purchased
74	NHMUK PI P 1321 (1)	2	hand specimen				Callopegma ficoideum Hinde, 1884		Croydon, Surrey, England, United Kingdom	Cretaceous, Chalk Group, Upper Chalk	History unrecorded
75	NHMUK PI S 7783	2	hand specimen		1893	BM(NH) number	?Callopegma Zittel, 1878		Sandown Bay, Isle of Wight, England, United Kingdom	Cretaceous, Chalk Group, Upper Chalk	ROWE, Arthur Walter, Nov 1926	Purchased
76	NHMUK PI P 1335	6	hand specimen				Callopegma ficoideum Hinde, 1884		Salisbury, Wiltshire, England, United Kingdom	Cretaceous, Chalk Group, Upper Chalk	CHARLESWORTH, Edward	Purchased
77	NHMUK PI S 4562	2	hand specimen				Callopegma ficoideum Hinde, 1884		Garston Lane, Watford, Hertfordshire, England, United Kingdom	Cretaceous, Chalk Group, Upper Chalk	EARLAND, Arthur, 28 Nov 1937
78	NHMUK PI P 1324	18	hand specimen				Callopegma ficoideum Hinde, 1884		South of England	Cretaceous, Chalk Group, Upper Chalk	History unrecorded
79	NHMUK PI P 1320	2	hand specimen				Callopegma ficoideum Hinde, 1884		England, United Kingdom	Cretaceous, Chalk Group, Upper Chalk	History unrecorded
80	NHMUK PI P 4105	1	hand specimen				?Callopegma Zittel, 1878		Salisbury, Wiltshire, England, United Kingdom	Cretaceous, Chalk Group, Upper Chalk	HARFORD, Fredrik, Jun 1888	Purchased
81	NHMUK PI P 3537	2	hand specimen				Callopegma ficoideum Hinde, 1884		Warminster, Wiltshire, England, United Kingdom	Cretaceous, Chalk Group, Upper Chalk	LEE, John Edward Collection, October 1885	Presented
82	NHMUK PI S 59	2	hand specimen				Callopegma ficoideum Hinde, 1884		Sutton, Surrey, England, United Kingdom	Cretaceous, Chalk Group, Upper Chalk	HOLMES, W. Murton, April 1909	Presented
83	NHMUK PI P 1329	1	hand specimen				?Callopegma Zittel, 1878		Brighton, Sussex, England, United Kingdom	Cretaceous, Chalk Group, Upper Chalk	SHARPE, J. Collection
84	NHMUK PI S 6998	1	hand specimen				?Callopegma Zittel, 1878		Flamborough, Yorkshire, England, United Kingdom	Cretaceous, Chalk Group, Upper Chalk, Senonian	OAKLEY, Dr. K. P., Dec 1950	Donated
85	NHMUK PI P 1331	1	hand specimen				?Callopegma Zittel, 1878		Beckhampton, Wiltshire, England, United Kingdom	Cretaceous, Chalk Group, Upper Chalk	CUNNINGTON Collection	Purchased
86	NHMUK PI P 1321 (2)	1	hand specimen				Callopegma ficoideum Hinde, 1884		Croydon, Surrey, England, United Kingdom	Cretaceous, Chalk Group, Upper Chalk	History unrecorded
87	NHMUK PI S 10493	2	hand specimen				?Callopegma Zittel, 1878		South of England	Cretaceous, Chalk Group, Upper Chalk	History unrecorded
88	NHMUK PI P 1323	2	hand specimen				Callopegma ficoideum Hinde, 1884		Pertwood, Warminster, Wiltshire, England, United Kingdom	Cretaceous, Chalk Group, Upper Chalk	History unrecorded
89	NHMUK PI P 1328 (3)	2	hand specimen				?Callopegma Zittel, 1878		Brighton, Sussex, England, United Kingdom	Cretaceous, Chalk Group, Upper Chalk	History unrecorded
90	NHMUK PI S 7505	2	hand specimen				?Callopegma Zittel, 1878		Great Easton, Market Harborough, Witshire, England, United Kingdom	Cretaceous	CLARK, Mr. Jr, bequest by Miss M. I. Courtney, Jan 1954	Bequest
91	NHMUK PI S 8460	0	hand specimen				Siphonia koenigi (Mantell, 1822)	Figured	Flamborough, Yorkshire, England, United Kingdom	Cretaceous, Chalk Group, Upper Chalk	History unrecorded		Castell, C.P., Cox, L.R. & Muir-Wood, H.M. 1962. British Mesozoic Fossils. British Museum Natural History. London, 205 pp (on pl. 49: fig. 6)
92	NHMUK PI P 1416 (1)	1	hand specimen				Siphonia koenigi (Mantell, 1822)	Figured	Flamborough, Yorkshire, England, United Kingdom	Cretaceous, Chalk Group, Upper Chalk	History unrecorded		Donovan, S.K. 2000. Fossils explained 31: Sponges 1. Geology Today, 16: 194-198. (on fig. 2f)
93	NHMUK PI P 1416 (2)	3	hand specimen				Siphonia koenigi (Mantell, 1822)		Flamborough, Yorkshire, England, United Kingdom	Cretaceous, Chalk Group, Upper Chalk	History unrecorded
94	NHMUK PI S 5744	1	hand specimen				?Siphonia Goldfuss 1826		Upware, Cambridgeshire, England, United Kingdom	Drift, Cretaceous	History unrecorded
95	NHMUK PI P 1535	1	hand specimen				Siphonia koenigi (Mantell, 1822)		Norwich, Norfolk, England, United Kingdom	Cretaceous, Chalk Group, Upper Chalk	KING, J. Collection
96	NHMUK PI S 4879	1	hand specimen				Siphonia koenigi (Mantell, 1822)		Southwold, Suffolk, England, United Kingdom	Cretaceous, Chalk Group, Upper Chalk, Senonian	GRUBBE, J. E., Feb 1939
97	NHMUK PI S 10494	1	hand specimen		49	BM(NH) number	?Siphonia Goldfuss 1826		Tharston, Norfolk, England, United Kingdom	Cretaceous	History unrecorded
98	NHMUK PI S 8022	1	hand specimen				Siphonia koenigi (Mantell, 1822)		Flamborough, Yorkshire, England, United Kingdom	Cretaceous, Chalk Group, Upper Chalk	History unrecorded
99	NHMUK PI P 1416 (3)	4	hand specimen				Siphonia koenigi (Mantell, 1822)	Figured	Flamborough, Yorkshire, England, United Kingdom	Cretaceous, Chalk Group, Upper Chalk, Senonian	History unrecorded		Hinde, G.J. 1884. Catalogue of the Fossil Sponges in the Geological Department of the British Museum (Natural History). With descriptions of new and little-known species. BM(NH), London, 248 pp. (on pl.13, figs. 4, 4d)
100	NHMUK PI S 7541	5	hand specimen				?Siphonia Goldfuss 1826		Hornhill Quarry, Lund, Driffield, Yorkshire, England, United Kingdom	Cretaceous, Chalk Group	History unrecorded
101	NHMUK PI S 7928	1	hand specimen				Siphonia koenigi (Mantell, 1822)		Margate, Kent, England, United Kingdom	Cretaceous, Chalk Group, Upper Chalk	ROWE, Arthur Walter, Nov 1926	Purchased
102	NHMUK PI P 1414 (1)	1	hand specimen				?Siphonia Goldfuss 1826		Lydden, Kent, England, United Kingdom	Cretaceous, Chalk Group	History unrecorded
103	NHMUK PI S 8049	1	hand specimen				Siphonia koenigi (Mantell, 1822)		Martin's Pit, Pinden, Kent, England, United Kingdom	Cretaceous, Chalk Group, Upper Chalk	FORD, R. L. E., May 1959	Presented
104	NHMUK PI S 2865	1	hand specimen				Siphonia koenigi (Mantell, 1822)		Peter's Pit, Burnham, Kent, England, United Kingdom	Cretaceous, Chalk Group, Upper Chalk, Turonian	DIBLEY, G. E.	Purchased
105	NHMUK PI OR 55228 (1)	2	hand specimen				?Siphonia Goldfuss 1826		Stoke Chalk Pit, Guildford, Surrey, England, United Kingdom	Cretaceous, Chalk Group	CAPRON, Bt. H., 1879	Purchased
106	NHMUK PI S 7899	0	hand specimen				?Siphonia Goldfuss 1826		Westgate, Kent, England, United Kingdom	Cretaceous, Chalk Group, Upper Chalk	ROWE, Arthur Walter, Nov 1926	Purchased
107	NHMUK PI S 7914	1	hand specimen				Siphonia koenigi (Mantell, 1822)	Figured	Kingsgate Castle, Margate, Kent, England, United Kingdom	Cretaceous, Chalk Group, Upper Chalk	ROWE, Arthur Walter, Nov 1926	Purchased	Donovan, S.K. 2000. Fossils explained 31: Sponges 1. Geology Today, 16: 194-198. (on fig. 2i)
108	NHMUK PI S 7873	1	hand specimen				?Siphonia Goldfuss 1826		Dover, Kent, England, United Kingdom	Cretaceous, Lower Chalk, Chalk Marl	ROWE, Arthur Walter, Nov 1926	Purchased
109	NHMUK PI S 10495	2	hand specimen				Siphonia koenigi (Mantell, 1822)		West Cliffs, Dover, Kent, England, United Kingdom	Cretaceous, Chalk Group	ROWE, Arthur Walter, Nov 1926	Purchased
110	NHMUK PI S 7926	1	hand specimen				Siphonia koenigi (Mantell, 1822)		Chatham, Kent, England, United Kingdom	Cretaceous, Chalk Group, Upper Chalk	ROWE, Arthur Walter, Nov 1926	Purchased
111	NHMUK PI S 7927	1	hand specimen				Siphonia koenigi (Mantell, 1822)		Chatham, Kent, England, United Kingdom	Cretaceous, Chalk Group, Upper Chalk	ROWE, Arthur Walter, Nov 1926	Purchased
112	NHMUK PI S 7923	1	hand specimen				?Siphonia Goldfuss 1826		Dumpton Gap, Ramsgate, Kent, England, United Kingdom	Cretaceous, Chalk Group, Upper Chalk	ROWE, Arthur Walter, Nov 1926	Purchased
113	NHMUK PI Z 21	1	hand specimen				Siphonia Goldfuss 1826?	Figured	Kent, England, United Kingdom	Cretaceous, Chalk Group	WETHERELL Collection, 1800s		Woodward, S.P. 1864. On the Nature and Origin of Banded Flints. Geological Magazine, Series 1, 1: 145-149. (on pl. 7, fig. 5, p. 148)
114	NHMUK PI S 5364	1	hand specimen				?Siphonia Goldfuss 1826		Bembridge Beach, Isle of Wight, England, United Kingdom	Cretaceous, Chalk Group, Upper Chalk	MARTIN, R.J. and WALLIS, H. C., bequest by T. C. Owen Wallis, Oct 1946	Bequest
115	NHMUK PI P 3542	1	hand specimen				?Siphonia Goldfuss 1826		Sidmouth, Devon, England, United Kingdom	Cretaceous, Chalk Group	LEE, John Edward Collection, October 1885	Presented
116	NHMUK PI S 5370	1	hand specimen				Siphonia koenigi (Mantell, 1822)		Ventnor, Isle of Wight, England, United Kingdom	Cretaceous, Chalk Group, Upper Chalk	MARTIN, R.J. and WALLIS, H. C., bequest by T. C. Owen Wallis, Oct 1946	Bequest
117	NHMUK PI S 7751	2	hand specimen				?Siphonia Goldfuss 1826		Sandown Bay, Isle of Wight, England, United Kingdom	Cretaceous, Chalk Group, Upper Chalk	ROWE, Arthur Walter, Nov 1926	Purchased
118	NHMUK PI OR 55000	1	hand specimen				?Siphonia Goldfuss 1826		Ventnor, Isle of Wight, England, United Kingdom	Cretaceous, Chalk Group, Upper Chalk	DOUGLAS, Miss E.
119	NHMUK PI S 5368	1	hand specimen				?Siphonia Goldfuss 1826		Ventnor, Isle of Wight, England, United Kingdom	Cretaceous, Chalk Group, Upper Chalk	MARTIN, R.J. and WALLIS, H. C., bequest by T. C. Owen Wallis, Oct 1946	Bequest
120	NHMUK PI S 5371	1	hand specimen				Siphonia koenigi (Mantell, 1822)		Ventnor, Isle of Wight, England, United Kingdom	Cretaceous, Chalk Group, Upper Chalk	MARTIN, R.J. and WALLIS, H. C., bequest by T. C. Owen Wallis, Oct 1946	Bequest
121	NHMUK PI S 5367	1	hand specimen				?Siphonia Goldfuss 1826		Yaverland Bay, Isle of Wight, England, United Kingdom	Cretaceous, Chalk Group, Upper Chalk	MARTIN, R.J. and WALLIS, H. C., bequest by T. C. Owen Wallis, Oct 1946	Bequest
122	NHMUK PI S 5372	1	hand specimen				Siphonia koenigi (Mantell, 1822)		Yaverland Bay, Isle of Wight, England, United Kingdom	Cretaceous, Chalk Group, Upper Chalk	MARTIN, R.J. and WALLIS, H. C., bequest by T. C. Owen Wallis, Oct 1946	Bequest
123	NHMUK PI S 9679	2	hand specimen				?Siphonia Goldfuss 1826		Palsgrove Pit, Portsdown Hills, Hampshire, England, United Kingdom	Cretaceous, Chalk Group, Upper Chalk, Senonian	ROWE, Arthur Walter, Nov 1926	Purchased
124	NHMUK PI S 5383	1	hand specimen				Siphonia koenigi (Mantell, 1822)	Figured	Sandown Bay, Isle of Wight, England, United Kingdom	Cretaceous, Chalk Group, Upper Chalk	MARTIN, R.J. and WALLIS, H. C., bequest by T. C. Owen Wallis, Oct 1946	Bequest	Taylor, P.D. 1990. Eyewitness Guides. Fossil. London, 64 pp. (on p. 25)
125	NHMUK PI S 5384	1	hand specimen				Siphonia koenigi (Mantell, 1822)		Sandown Bay, Isle of Wight, England, United Kingdom	Cretaceous, Chalk Group, Upper Chalk	MARTIN, R.J. and WALLIS, H. C., bequest by T. C. Owen Wallis, Oct 1946	Bequest
126	NHMUK PI S 5385 (1)	1	hand specimen				Siphonia koenigi (Mantell, 1822)		Sandown Bay, Isle of Wight, England, United Kingdom	Cretaceous, Chalk Group, Upper Chalk	MARTIN, R.J. and WALLIS, H. C., bequest by T. C. Owen Wallis, Oct 1946	Bequest
127	NHMUK PI S 5386	0	hand specimen				Siphonia koenigi (Mantell, 1822)		Sandown Bay, Isle of Wight, England, United Kingdom	Cretaceous, Chalk Group, Upper Chalk	MARTIN, R.J. and WALLIS, H. C., bequest by T. C. Owen Wallis, Oct 1946	Bequest
128	NHMUK PI S 5387	1	hand specimen				Siphonia koenigi (Mantell, 1822)		Sandown Bay, Isle of Wight, England, United Kingdom	Cretaceous, Chalk Group, Upper Chalk	MARTIN, R.J. and WALLIS, H. C., bequest by T. C. Owen Wallis, Oct 1946	Bequest
129	NHMUK PI S 5374	1	hand specimen				Siphonia koenigi (Mantell, 1822)		Isle of Wight, England, United Kingdom	Cretaceous, Chalk Group, Upper Chalk	MARTIN, R.J. and WALLIS, H. C., bequest by T. C. Owen Wallis, Oct 1946	Bequest
130	NHMUK PI S 5375	1	hand specimen				Siphonia koenigi (Mantell, 1822)		Isle of Wight, England, United Kingdom	Cretaceous, Chalk Group, Upper Chalk	MARTIN, R.J. and WALLIS, H. C., bequest by T. C. Owen Wallis, Oct 1946	Bequest
131	NHMUK PI S 5376	1	hand specimen				Siphonia koenigi (Mantell, 1822)		Isle of Wight, England, United Kingdom	Cretaceous, Chalk Group, Upper Chalk	MARTIN, R.J. and WALLIS, H. C., bequest by T. C. Owen Wallis, Oct 1946	Bequest
132	NHMUK PI S 5377	1	hand specimen				Siphonia koenigi (Mantell, 1822)		Isle of Wight, England, United Kingdom	Cretaceous, Chalk Group, Upper Chalk	MARTIN, R.J. and WALLIS, H. C., bequest by T. C. Owen Wallis, Oct 1946	Bequest
133	NHMUK PI S 5378	1	hand specimen				Siphonia koenigi (Mantell, 1822)		Isle of Wight, England, United Kingdom	Cretaceous, Chalk Group, Upper Chalk	MARTIN, R.J. and WALLIS, H. C., bequest by T. C. Owen Wallis, Oct 1946	Bequest
134	NHMUK PI S 5379	1	hand specimen				Siphonia koenigi (Mantell, 1822)		Isle of Wight, England, United Kingdom	Cretaceous, Chalk Group, Upper Chalk	MARTIN, R.J. and WALLIS, H. C., bequest by T. C. Owen Wallis, Oct 1946	Bequest
135	NHMUK PI P 5117	1	hand specimen				Siphonia koenigi (Mantell, 1822)		Sandown Bay, Isle of Wight, England, United Kingdom	Cretaceous, Chalk Group, Upper Chalk	ROWE, Arthur Walter, Nov 1926	Purchased
136	NHMUK PI S 5380	1	hand specimen				Siphonia koenigi (Mantell, 1822)		Highport, Ventnor, Isle of Wight, England, United Kingdom	Cretaceous, Chalk Group, Upper Chalk	MARTIN, R.J. and WALLIS, H. C., bequest by T. C. Owen Wallis, Oct 1946	Bequest
137	NHMUK PI S 5381	1	hand specimen				Siphonia koenigi (Mantell, 1822)		Highport, Ventnor, Isle of Wight, England, United Kingdom	Cretaceous, Chalk Group, Upper Chalk	MARTIN, R.J. and WALLIS, H. C., bequest by T. C. Owen Wallis, Oct 1946	Bequest
138	NHMUK PI S 5382	1	hand specimen				Siphonia koenigi (Mantell, 1822)		Highport, Ventnor, Isle of Wight, England, United Kingdom	Cretaceous, Chalk Group, Upper Chalk	MARTIN, R.J. and WALLIS, H. C., bequest by T. C. Owen Wallis, Oct 1946	Bequest
139	NHMUK PI S 4672	2	hand specimen				?Siphonia Goldfuss 1826		Sussex, England, United Kingdom	Cretaceous, Chalk Group, Upper Chalk	BECKLES, H. S., Apr 1891	Purchased
140	NHMUK PI P 1531	1	hand specimen				Siphonia koenigi (Mantell, 1822)		Sussex, England, United Kingdom	Cretaceous, Chalk Group, Upper Chalk	SMITH, Joshua Toulmin, 1869	Purchased
141	NHMUK PI P 1418 (1)	1	hand specimen				Siphonia koenigi (Mantell, 1822)	Figured	Lewes, Sussex, England, United Kingdom	Cretaceous, Chalk Group, Upper Chalk	History unrecorded		Mantell, G.A. 1822. The Fossils of the South Downs; or illustrations of the geology of Sussex. London, 327 pp. (on pl. 16, fig. 19)
142	NHMUK PI P 1384	2	hand specimen				?Siphonia Goldfuss 1826		Beckhampton, Wiltshire, England, United Kingdom	Cretaceous, Chalk Group, Upper Chalk	CUNNINGTON Collection	Purchased
143	NHMUK PI S 3467	1	hand specimen				Siphonia koenigi (Mantell, 1822)		Lewes, Sussex, England, United Kingdom	Cretaceous, Chalk Group	TAYLOR, H., Nov 1928
144	NHMUK PI OR 55116	1	hand specimen				?Siphonia Goldfuss 1826		Beckhampton, Wiltshire, England, United Kingdom	Cretaceous, Chalk Group	CUNNINGTON Collection	Purchased
145	NHMUK PI S 7604	1	hand specimen				?Siphonia Goldfuss 1826		Slough, Buckinghamshire, England, United Kingdom	Cretaceous, Chalk Group	CARR, Dr. J., May 1954	Donated
146	NHMUK PI S 9860	2	hand specimen				Siphonia koenigi (Mantell, 1822)		Beckhampton, Wiltshire, England, United Kingdom	Cretaceous, Chalk Group, Upper Chalk	History unrecorded
147	NHMUK PI S 5373	1	hand specimen				Siphonia koenigi (Mantell, 1822)		Bognor Regis, Sussex, England, United Kingdom	Cretaceous, Chalk Group, Upper Chalk	MARTIN, R.J. and WALLIS, H. C., bequest by T. C. Owen Wallis, Oct 1946	Bequest
148	NHMUK PI P 4974	1	hand specimen				?Siphonia Goldfuss 1826		Wishford, Wiltshire, England, United Kingdom	Upper Cretaceous	BRODIE Collection
149	NHMUK PI S 4840 (1)	1	hand specimen				Siphonia koenigi (Mantell, 1822)	Figured	Sussex, England, United Kingdom	Cretaceous, Chalk Group, Upper Chalk, Senonian	History unrecorded		Castell, C.P., Cox, L.R. & Muir-Wood, H.M. 1962. British Mesozoic Fossils. British Museum Natural History. London, 205 pp (on pl. 49: fig. 7)
150	NHMUK PI P 1532 (1)	11	hand specimen				Siphonia koenigi (Mantell, 1822)		Brighton, Sussex, England, United Kingdom	Cretaceous, Chalk Group, Upper Chalk	MANTELL, Gideon Algernon, 1839	Purchased
151	NHMUK PI P 1532 (2)	1	hand specimen				Siphonia koenigi (Mantell, 1822)		Sussex, England, United Kingdom	Cretaceous, Chalk Group	History unrecorded
152	NHMUK PI S 4902	1	hand specimen				Siphonia koenigi (Mantell, 1822)		Cannon Court Farm, Maidenhead, Kent, England, United Kingdom	Cretaceous, Chalk Group, Upper Chalk, Senonian	WOOLRIDGE, Dr. S. W., Feb 1939	Donated
153	NHMUK PI P 1418 (2)	5	hand specimen				Siphonia koenigi (Mantell, 1822)		Sussex, England, United Kingdom	Cretaceous, Chalk Group, Upper Chalk	MANTELL, Gideon Algernon, 1839	Purchased
154	NHMUK PI P 1537 (1)	3	hand specimen				Siphonia koenigi (Mantell, 1822)		Sussex, England, United Kingdom	Cretaceous, Chalk Group, Upper Chalk	History unrecorded
155	NHMUK PI S 7946	1	hand specimen				?Siphonia Goldfuss 1826		Sussex, England, United Kingdom	Cretaceous, Chalk Group, Upper Chalk	ROWE, Arthur Walter, Nov 1926	Purchased
156	NHMUK PI P 4951	1	hand specimen				Siphonia koenigi (Mantell, 1822)		Sussex, England, United Kingdom	Cretaceous, Chalk Group, Upper Chalk	HARFORD, Miss, April, 1895	Purchased
157	NHMUK PI P 4142	1	hand specimen				Siphonia koenigi (Mantell, 1822)		Sussex, England, United Kingdom	Cretaceous, Chalk Group, Upper Chalk	HARFORD, Fredrik, Jun 1888	Purchased
158	NHMUK PI P 1531 (1)	1	hand specimen				Siphonia koenigi (Mantell, 1822)		Sussex, England, United Kingdom	Cretaceous, Chalk Group, Upper Chalk	SMITH, Joshua Toulmin, 1869	Purchased
159	NHMUK PI OR 54961	1	hand specimen				?Siphonia Goldfuss 1826		Sussex, England, United Kingdom	Cretaceous, Chalk Group, Upper Chalk	CHARLESWORTH, Edward	Purchased
160	NHMUK PI S 584	2	hand specimen				Siphonia koenigi (Mantell, 1822)		Brighton, Sussex, England, United Kingdom	Cretaceous, Chalk Group, Upper Chalk	BUTLER Collection	Purchased
161	NHMUK PI OR 54880 (1)	1	hand specimen				Siphonia koenigi (Mantell, 1822)		Brighton, Sussex, England, United Kingdom	Cretaceous, Chalk Group, Upper Chalk	CHARLESWORTH, Edward	Purchased
162	NHMUK PI OR 48054	1	hand specimen				Siphonia koenigi (Mantell, 1822)		Sussex, England, United Kingdom	Cretaceous, Chalk Group, Upper Chalk	History unrecorded
163	NHMUK PI OR 55094	1	hand specimen				Siphonia koenigi (Mantell, 1822)		Brighton, Sussex, England, United Kingdom	Cretaceous, Chalk Group, Upper Chalk	History unrecorded
164	NHMUK PI P 1531 (2)	1	hand specimen				Siphonia koenigi (Mantell, 1822)		Sussex, England, United Kingdom	Cretaceous, Chalk Group, Upper Chalk	SMITH, Joshua Toulmin, 1869	Purchased
165	NHMUK PI P 4108	1	hand specimen				Siphonia koenigi (Mantell, 1822)		Brighton, Sussex, England, United Kingdom	Cretaceous, Chalk Group, Upper Chalk	HARFORD, Fredrik, Jun 1888	Purchased
166	NHMUK PI P 1536	1	hand specimen				Siphonia koenigi (Mantell, 1822)		Sussex, England, United Kingdom	Cretaceous, Chalk Group, Upper Chalk	History unrecorded
167	NHMUK PI P 1531 (3)	1	hand specimen				Siphonia koenigi (Mantell, 1822)		Sussex, England, United Kingdom	Cretaceous, Chalk Group, Upper Chalk	SMITH, Joshua Toulmin, 1869	Purchased
168	NHMUK PI OR 54997	3	hand specimen				?Siphonia Goldfuss 1826		Sussex, England, United Kingdom	Cretaceous, Chalk Group, Upper Chalk	CHARLESWORTH, Edward, Jul 1874	Purchased
169	NHMUK PI P 1531 (4)	1	hand specimen				Siphonia koenigi (Mantell, 1822)		Sussex, England, United Kingdom	Cretaceous, Chalk Group, Upper Chalk	SMITH, Joshua Toulmin, 1869	Purchased
170	NHMUK PI OR 36440	0	hand specimen				Siphonia koenigi (Mantell, 1822)		Brighton, Sussex, England, United Kingdom	Cretaceous, Chalk Group, Upper Chalk	KIRBY Collection
171	NHMUK PI S 4687	1	hand specimen				?Siphonia Goldfuss 1826	Figured	Worthing, Sussex, England, United Kingdom	Cretaceous, Chalk Group, Upper Chalk, Senonian	WAKEFIELD, Mrs. A., Nov 1937	Purchased	Dixon, F. 1850. The geology and fossils of the Tertiary and Cretaceous formations of Sussex. London, 423 + xvi pp. (on p. 67-8, pl. xvii, fig. 10)
172	NHMUK PI S 4686	1	hand specimen				?Siphonia Goldfuss 1826	Figured	Worthing, Sussex, England, United Kingdom	Cretaceous, Chalk Group, Upper Chalk, Senonian	WAKEFIELD, Mrs. A., Nov 1937	Purchased	Dixon, F. 1850. The geology and fossils of the Tertiary and Cretaceous formations of Sussex. London, 423 + xvi pp. (on p. 67-8, pl. xvii, fig. 8)
173	NHMUK PI S 4685	1	hand specimen				?Siphonia Goldfuss 1826	Figured	Worthing, Sussex, England, United Kingdom	Cretaceous, Chalk Group, Upper Chalk, Senonian	WAKEFIELD, Mrs. A., Nov 1937	Purchased	Dixon, F. 1850. The geology and fossils of the Tertiary and Cretaceous formations of Sussex. London, 423 + xvi pp. (on p. 67-8, pl. xvii, fig. 5)
174	NHMUK PI OR 55085	1	hand specimen				Siphonia koenigi (Mantell, 1822)	Figured	Sussex, England, United Kingdom	Cretaceous, Chalk Group, Upper Chalk, Senonian	CHARLESWORTH, Edward	Purchased	Donovan, S.K. 2000. Fossils explained 31: Sponges 1. Geology Today, 16: 194-198. (on fig. 2b)
175	NHMUK PI S 4978	1	hand specimen				Siphonia koenigi (Mantell, 1822)		Brighton, Sussex, England, United Kingdom	Cretaceous, Chalk Group, Upper Chalk, Senonian	History unrecorded
176	NHMUK PI P 1534	1	hand specimen				Siphonia koenigi (Mantell, 1822)		Brighton, Sussex, England, United Kingdom	Cretaceous, Chalk Group, Upper Chalk	History unrecorded
177	NHMUK PI OR 40356	2	hand specimen				?Siphonia Goldfuss 1826		Brighton, Sussex, England, United Kingdom	Cretaceous, Chalk Group, Upper Chalk	CHARLESWORTH, Edward, 1863	Purchased
178	NHMUK PI OR 55082	1	hand specimen				?Siphonia Goldfuss 1826		Unrecorded	Cretaceous, Chalk Group	PERCIVAL, S. A., 1875
179	NHMUK PI P 4159	1	hand specimen				Siphonia koenigi (Mantell, 1822)		Sussex, England, United Kingdom	Cretaceous, Chalk Group	HARFORD, Frederick, 1879	Purchased
180	NHMUK PI S 9726	1	hand specimen				?Siphonia Goldfuss 1826		Castle Hill, Lewes, Sussex, England, United Kingdom	Cretaceous, Chalk Group, Upper Chalk, Senonian	GASTER, Christopher Theodore Augustine, Collection	Presented
181	NHMUK PI P 1531 (5)	2	hand specimen				Siphonia koenigi (Mantell, 1822)		Sussex, England, United Kingdom	Cretaceous, Chalk Group, Upper Chalk	SMITH, Joshua Toulmin, 1869	Purchased
182	NHMUK PI OR 55182	1	hand specimen				Siphonia koenigi (Mantell, 1822)		Sussex, England, United Kingdom	Cretaceous, Chalk Group, Upper Chalk	CHARLESWORTH, Edward	Purchased
183	NHMUK PI OR 55227	2	hand specimen				Siphonia koenigi (Mantell, 1822)		Brighton, Sussex, England, United Kingdom	Cretaceous, Chalk Group, Upper Chalk	CAPRON Collection	Purchased
184	NHMUK PI S 9725	1	hand specimen				Siphonia koenigi (Mantell, 1822)		Offham Hill, Lewes, Sussex, England, United Kingdom	Cretaceous, Chalk Group, Upper Chalk, Senonian	GASTER, Christopher Theodore Augustine, Collection	Presented
185	NHMUK PI OR 54880 (2)	1	hand specimen				?Siphonia Goldfuss 1826		Sussex, England, United Kingdom	Cretaceous, Chalk Group, Upper Chalk	History unrecorded
186	NHMUK PI P 1368	2	hand specimen				?Siphonia Goldfuss 1826		Ringmer, Lewes, Sussex, England, United Kingdom	Cretaceous, Lower Chalk, Chalk Marl	MANTELL, Gideon Algernon, 1839	Purchased
187	NHMUK PI P 1531 (6)	2	hand specimen				Siphonia koenigi (Mantell, 1822)		Sussex, England, United Kingdom	Cretaceous, Chalk Group, Upper Chalk	SMITH, Joshua Toulmin, 1869	Purchased
188	NHMUK PI P 1417 (1)	2	hand specimen				Siphonia koenigi (Mantell, 1822)		Sussex, England, United Kingdom	Cretaceous, Chalk Group, Upper Chalk	History unrecorded
189	NHMUK PI P 1415 (1)	2	hand specimen				?Siphonia Goldfuss 1826		Sussex, England, United Kingdom	Cretaceous, Chalk Group, Upper Chalk	SMITH, Joshua Toulmin, 1869	Purchased
190	NHMUK PI P 1531 (7)	1	hand specimen				Siphonia koenigi (Mantell, 1822)		South of England	Cretaceous, Chalk Group, Upper Chalk	SMITH, Joshua Toulmin, 1869	Purchased
191	NHMUK PI S 10496	2	hand specimen		7207 & 1893	BM(NH) number	Siphonia koenigi (Mantell, 1822)		South of England	Cretaceous, Chalk Group	History unrecorded
192	NHMUK PI S 10497	1	hand specimen		1896	BM(NH) number	Siphonia koenigi (Mantell, 1822)		South of England	Cretaceous, Chalk Group	History unrecorded
193	NHMUK PI S 7050	1	hand specimen				Siphonia koenigi (Mantell, 1822)		South of England	Cretaceous, Chalk Group, Upper Chalk, Senonian	HOWARD, Miss. E., July, 1939	Purchased
194	NHMUK PI S 4017	2	hand specimen				Siphonia koenigi (Mantell, 1822)		Sussex, England	Cretaceous, Chalk Group, Upper Chalk	SOWERBY Collection
195	NHMUK PI OR 5297	1	hand specimen				Siphonia koenigi (Mantell, 1822)		South of England	Cretaceous, Chalk Group, Upper Chalk	MANTELL, Gideon Algernon, 1839	Purchased
196	NHMUK PI P 1531 (8)	3	hand specimen				Siphonia koenigi (Mantell, 1822)		South of England	Cretaceous, Chalk Group, Upper Chalk	SMITH, Joshua Toulmin, 1869	Purchased
197	NHMUK PI OR 46997 (1)	6	hand specimen				Siphonia koenigi (Mantell, 1822)		South of England	Cretaceous, Chalk Group, Upper Chalk	SMITH, Joshua Toulmin, 1869	Purchased
198	NHMUK PI P 1418 (3)	1	hand specimen				Siphonia koenigi (Mantell, 1822)		South of England	Cretaceous, Chalk Group, Upper Chalk	History unrecorded
199	NHMUK PI P 1470 (2)	1	hand specimen				?Siphonia Goldfuss 1826		Flamborough, Yorkshire, England, United Kingdom	Cretaceous, Chalk Group, Upper Chalk	HARFORD, Fredrik, Jun 1888	Purchased
200	NHMUK PI OR 46997 (2)	1	hand specimen				Siphonia koenigi (Mantell, 1822)		South of England	Cretaceous, Chalk Group, Upper Chalk	SMITH, Joshua Toulmin, 1869	Purchased
201	NHMUK PI S 9879	1	hand specimen				Siphonia koenigi (Mantell, 1822)		South of England	Cretaceous, Chalk Group, Upper Chalk	History unrecorded
202	NHMUK PI OR 46997 (3)	1	hand specimen				?Siphonia Goldfuss 1826		Brighton, Sussex, England, United Kingdom	Cretaceous, Chalk Group	SMITH, Joshua Toulmin, 1869	Purchased
203	NHMUK PI S 5388	1	hand specimen				Siphonia koenigi (Mantell, 1822)		South coast of England, United Kingdom	Cretaceous, Chalk Group, Upper Chalk	MARTIN, R.J. and WALLIS, H. C., bequest by T. C. Owen Wallis, Oct 1946	Bequest
204	NHMUK PI OR 46997 (4)	2	hand specimen				Siphonia koenigi (Mantell, 1822)		South of England	Cretaceous, Chalk Group, Upper Chalk	SMITH, Joshua Toulmin, 1869	Purchased
205	NHMUK PI OR 46997 (5)	2	hand specimen				Siphonia koenigi (Mantell, 1822)		South of England	Cretaceous, Chalk Group, Upper Chalk	SMITH, Joshua Toulmin, 1869	Purchased
206	NHMUK PI P 1531 (9)	1	hand specimen				Siphonia koenigi (Mantell, 1822)		South of England	Cretaceous, Chalk Group, Upper Chalk	History unrecorded
207	NHMUK PI OR 46997 (1) $10	1	thin section				Siphonia koenigi (Mantell, 1822)		South of England	Cretaceous, Chalk Group, Upper Chalk	SMITH, Joshua Toulmin, 1869	Purchased
208	NHMUK PI P 1417 (2)	1	hand specimen				Siphonia koenigi (Mantell, 1822)		South of England	Cretaceous, Chalk Group, Upper Chalk	SMITH, Joshua Toulmin, 1869	Purchased
209	NHMUK PI OR 46997 (11)	2	hand specimen				Siphonia koenigi (Mantell, 1822)		South of England	Cretaceous, Chalk Group, Upper Chalk	SMITH, Joshua Toulmin, 1869	Purchased
210	NHMUK PI P 1513 (10)	2	hand specimen				Siphonia koenigi (Mantell, 1822)		South of England	Cretaceous, Chalk Group, Upper Chalk	SMITH, Joshua Toulmin, 1869	Purchased
211	NHMUK PI P 1531 (11)	1	hand specimen				Siphonia koenigi (Mantell, 1822)		South of England	Cretaceous, Chalk Group, Upper Chalk	SMITH, Joshua Toulmin, 1869	Purchased
212	NHMUK PI P 1531 (12)	2	hand specimen				Siphonia koenigi (Mantell, 1822)		South of England	Cretaceous, Chalk Group, Upper Chalk	SMITH, Joshua Toulmin, 1869	Purchased
213	NHMUK PI P 1533 (1)	1	hand specimen				Siphonia koenigi (Mantell, 1822)		South of England	Cretaceous, Chalk Group, Upper Chalk	History unrecorded
214	NHMUK PI S 7051	1	hand specimen				Siphonia koenigi (Mantell, 1822)		South of England	Cretaceous, Chalk Group	HOWARD, Miss. E., July, 1939	Purchased
215	NHMUK PI P 1531 (13)	1	hand specimen				Siphonia koenigi (Mantell, 1822)		South of England	Cretaceous, Chalk Group, Upper Chalk	History unrecorded
216	NHMUK PI OR 46997 (12)	1	hand specimen				Siphonia koenigi (Mantell, 1822)		South of England	Cretaceous, Chalk Group, Upper Chalk	History unrecorded
217	NHMUK PI P 1531 (14)	1	hand specimen				Siphonia koenigi (Mantell, 1822)		South of England	Cretaceous, Chalk Group, Upper Chalk	SMITH, Joshua Toulmin, 1869	Purchased
218	NHMUK PI P 1531 (15)	1	hand specimen				Siphonia koenigi (Mantell, 1822)		South of England	Cretaceous, Chalk Group, Upper Chalk	SMITH, Joshua Toulmin, 1869	Purchased
219	NHMUK PI P 1531 (16)	1	hand specimen				Siphonia koenigi (Mantell, 1822)		South of England	Cretaceous, Chalk Group, Upper Chalk	SMITH, Joshua Toulmin, 1869	Purchased
220	NHMUK PI OR 46997 (13)	2	hand specimen				Siphonia koenigi (Mantell, 1822)		South of England	Cretaceous, Chalk Group, Upper Chalk	History unrecorded
221	NHMUK PI P 1531 (17)	4	hand specimen				Siphonia koenigi (Mantell, 1822)		South of England	Cretaceous, Chalk Group, Upper Chalk	SMITH, Joshua Toulmin, 1869	Purchased
222	NHMUK PI P 1415 (2)	3	hand specimen				?Siphonia Goldfuss 1826		South of England	Cretaceous, Chalk Group, Upper Chalk	SMITH, Joshua Toulmin, 1869	Purchased
223	NHMUK PI OR 46997 (14)	2	hand specimen				Siphonia koenigi (Mantell, 1822)		South of England	Cretaceous, Chalk Group, Upper Chalk	SMITH, Joshua Toulmin, 1869	Purchased
224	NHMUK PI P 1531 (18)	1	hand specimen				Siphonia koenigi (Mantell, 1822)		South of England	Cretaceous, Chalk Group, Upper Chalk	SMITH, Joshua Toulmin, 1869	Purchased
225	NHMUK PI OR 46997 (15)	1	hand specimen				Siphonia koenigi (Mantell, 1822)		South of England	Cretaceous, Chalk Group, Upper Chalk	SMITH, Joshua Toulmin, 1869	Purchased
226	NHMUK PI OR 46997 (16)	2	hand specimen				Siphonia koenigi (Mantell, 1822)		South of England	Cretaceous, Chalk Group, Upper Chalk	SMITH, Joshua Toulmin, 1869	Purchased
227	NHMUK PI P 1531 (19)	2	hand specimen				Siphonia koenigi (Mantell, 1822)		South of England	Cretaceous, Chalk Group, Upper Chalk	SMITH, Joshua Toulmin, 1869	Purchased
228	NHMUK PI OR 46997 (17)	5	hand specimen				Siphonia koenigi (Mantell, 1822)		South of England	Cretaceous, Chalk Group, Upper Chalk	SMITH, Joshua Toulmin, 1869	Purchased
229	NHMUK PI OR 46997 (18)	5	hand specimen				Siphonia koenigi (Mantell, 1822)		South of England	Cretaceous, Chalk Group, Upper Chalk	SMITH, Joshua Toulmin, 1869	Purchased
230	NHMUK PI OR 46997 (19)	1	hand specimen				Siphonia koenigi (Mantell, 1822)		South of England	Cretaceous, Chalk Group, Upper Chalk	SMITH, Joshua Toulmin, 1869	Purchased
231	NHMUK PI OR 46997 (20)	1	hand specimen				Siphonia koenigi (Mantell, 1822)		South of England	Cretaceous, Chalk Group, Upper Chalk	SMITH, Joshua Toulmin, 1869	Purchased
232	NHMUK PI OR 46997 (21)	1	hand specimen				Siphonia koenigi (Mantell, 1822)		South of England	Cretaceous, Chalk Group, Upper Chalk	SMITH, Joshua Toulmin, 1869	Purchased
233	NHMUK PI OR 46997 (22)	1	hand specimen				Siphonia koenigi (Mantell, 1822)		South of England	Cretaceous, Chalk Group, Upper Chalk	SMITH, Joshua Toulmin, 1869	Purchased
234	NHMUK PI OR 46997 (23)	3	hand specimen				Siphonia koenigi (Mantell, 1822)		South of England	Cretaceous, Chalk Group, Upper Chalk	SMITH, Joshua Toulmin, 1869	Purchased
235	NHMUK PI OR 46997 (1) $1	1	thin section				Siphonia koenigi (Mantell, 1822)		South of England	Cretaceous, Chalk Group, Upper Chalk	SMITH, Joshua Toulmin, 1869	Purchased
236	NHMUK PI P 1531 (20)	2	hand specimen				Siphonia koenigi (Mantell, 1822)		South of England	Cretaceous, Chalk Group, Upper Chalk	SMITH, Joshua Toulmin, 1869	Purchased
237	NHMUK PI OR 46997 (24)	2	hand specimen				Siphonia koenigi (Mantell, 1822)		South of England	Cretaceous, Chalk Group, Upper Chalk	SMITH, Joshua Toulmin, 1869	Purchased
238	NHMUK PI OR 46997 (25)	1	hand specimen				Siphonia koenigi (Mantell, 1822)		South of England	Cretaceous, Chalk Group, Upper Chalk	SMITH, Joshua Toulmin, 1869	Purchased
239	NHMUK PI P 1531 (21)	1	hand specimen				Siphonia koenigi (Mantell, 1822)		South of England	Cretaceous, Chalk Group, Upper Chalk	SMITH, Joshua Toulmin, 1869	Purchased
240	NHMUK PI P 1531 (22)	1	hand specimen				Siphonia koenigi (Mantell, 1822)		South of England	Cretaceous, Chalk Group, Upper Chalk	SMITH, Joshua Toulmin, 1869	Purchased
241	NHMUK PI OR 46997 (26)	1	hand specimen				Siphonia koenigi (Mantell, 1822)		South of England	Cretaceous, Chalk Group, Upper Chalk	SMITH, Joshua Toulmin, 1869	Purchased
242	NHMUK PI OR 46997 (27)	1	hand specimen				Siphonia koenigi (Mantell, 1822)		South of England	Cretaceous, Chalk Group, Upper Chalk	SMITH, Joshua Toulmin, 1869	Purchased
243	NHMUK PI OR 46997 (28)	2	hand specimen				Siphonia koenigi (Mantell, 1822)		South of England	Cretaceous, Chalk Group, Upper Chalk	SMITH, Joshua Toulmin, 1869	Purchased
244	NHMUK PI OR 46997 (29)	1	hand specimen				Siphonia koenigi (Mantell, 1822)		South of England	Cretaceous, Chalk Group, Upper Chalk	SMITH, Joshua Toulmin, 1869	Purchased
245	NHMUK PI OR 46997 (30)	2	hand specimen				Siphonia koenigi (Mantell, 1822)		South of England	Cretaceous, Chalk Group, Upper Chalk	SMITH, Joshua Toulmin, 1869	Purchased
246	NHMUK PI P 1418 (4)	4	hand specimen				Siphonia koenigi (Mantell, 1822)		South of England	Cretaceous, Chalk Group, Upper Chalk	SMITH, Joshua Toulmin, 1869	Purchased
247	NHMUK PI P 1531 (23)	2	hand specimen				Siphonia koenigi (Mantell, 1822)		South of England	Cretaceous, Chalk Group, Upper Chalk	SMITH, Joshua Toulmin, 1869	Purchased
248	NHMUK PI P 1531 (24)	2	hand specimen				Siphonia koenigi (Mantell, 1822)		South of England	Cretaceous, Chalk Group, Upper Chalk	History unrecorded
249	NHMUK PI OR 46997 (31)	2	hand specimen				Siphonia koenigi (Mantell, 1822)		South of England	Cretaceous, Chalk Group, Upper Chalk	SMITH, Joshua Toulmin, 1869	Purchased
250	NHMUK PI P 1531 (25)	1	hand specimen				Siphonia koenigi (Mantell, 1822)		South of England	Cretaceous, Chalk Group, Upper Chalk	History unrecorded
251	NHMUK PI OR 46997 (32)	1	hand specimen				Siphonia koenigi (Mantell, 1822)		South of England	Cretaceous, Chalk Group, Upper Chalk	SMITH, Joshua Toulmin, 1869	Purchased
252	NHMUK PI OR 46997 (33)	3	hand specimen				Siphonia koenigi (Mantell, 1822)		South of England	Cretaceous, Chalk Group, Upper Chalk	SMITH, Joshua Toulmin, 1869	Purchased
253	NHMUK PI OR 46997 (34)	2	hand specimen				Siphonia koenigi (Mantell, 1822)		South of England	Cretaceous, Chalk Group, Upper Chalk	SMITH, Joshua Toulmin, 1869	Purchased
254	NHMUK PI OR 46997 (35)	1	hand specimen				Siphonia koenigi (Mantell, 1822)		South of England	Cretaceous, Chalk Group, Upper Chalk	SMITH, Joshua Toulmin, 1869	Purchased
255	NHMUK PI P 4587	1	hand specimen				Siphonia koenigi (Mantell, 1822)		South of England	Cretaceous, Chalk Group, Upper Chalk	HARFORD, Frederick	Purchased
256	NHMUK PI P 1414 (2)	3	hand specimen				?Siphonia Goldfuss 1826		South of England	Cretaceous, Chalk Group, Upper Chalk	SMITH, Joshua Toulmin, 1869	Purchased
257	NHMUK PI OR 46997 (36)	2	hand specimen				Siphonia koenigi (Mantell, 1822)		South of England	Cretaceous, Chalk Group, Upper Chalk	SMITH, Joshua Toulmin, 1869	Purchased
258	NHMUK PI S 10498	1	hand specimen				?Siphonia Goldfuss 1826		South of England	Cretaceous, Chalk Group	History unrecorded
259	NHMUK PI S 10499	1	hand specimen				?Siphonia Goldfuss 1826		South of England	Cretaceous, Chalk Group	History unrecorded
260	NHMUK PI OR 46997 (37)	2	hand specimen				Siphonia koenigi (Mantell, 1822)		South of England	Cretaceous, Chalk Group, Upper Chalk	SMITH, Joshua Toulmin, 1869	Purchased
261	NHMUK PI P 1415 (3)	2	hand specimen				?Siphonia Goldfuss 1826		South of England	Cretaceous, Chalk Group, Upper Chalk	SMITH, Joshua Toulmin, 1869	Purchased
262	NHMUK PI P 1416 (4)	1	hand specimen				Siphonia koenigi (Mantell, 1822)		Flamborough, Yorkshire, England, United Kingdom	Cretaceous, Chalk Group, Upper Chalk	History unrecorded
263	NHMUK PI OR 5435	1	hand specimen				Siphonia koenigi (Mantell, 1822)		South of England	Cretaceous, Chalk Group, Upper Chalk	MANTELL, Gideon Algernon, 1839	Purchased
264	NHMUK PI P 1531 (26)	1	hand specimen				Siphonia koenigi (Mantell, 1822)		South of England	Cretaceous, Chalk Group, Upper Chalk	History unrecorded
265	NHMUK PI P 1531 (27)	2	hand specimen				Siphonia koenigi (Mantell, 1822)		South of England	Cretaceous, Chalk Group, Upper Chalk	SMITH, Joshua Toulmin, 1869	Purchased
266	NHMUK PI OR 46997 (38)	1	hand specimen				Siphonia koenigi (Mantell, 1822)		South of England	Cretaceous, Chalk Group, Upper Chalk	SMITH, Joshua Toulmin, 1869	Purchased
267	NHMUK PI P 1533 (2)	1	hand specimen				Siphonia koenigi (Mantell, 1822)		South of England	Cretaceous, Chalk Group, Upper Chalk	History unrecorded
268	NHMUK PI P 1531 (28)	1	hand specimen				Siphonia koenigi (Mantell, 1822)		South of England	Cretaceous, Chalk Group, Upper Chalk	History unrecorded
269	NHMUK PI OR 46997 (39)	1	hand specimen				Siphonia koenigi (Mantell, 1822)		South of England	Cretaceous, Chalk Group, Upper Chalk	SMITH, Joshua Toulmin, 1869	Purchased
270	NHMUK PI P 1387 (1)	6	hand specimen				Siphonia tulipa Zittel, 1878		Blackdown, Devon, England, United Kingdom	Cretaceous, Upper Greensand	CUNNINGTON Collection	Purchased
271	NHMUK PI P 4117	1	hand specimen				Siphonia pyriformis Goldfuss, 1826		Blackdown, Devon, England, United Kingdom	Cretaceous, Upper Greensand	HARFORD, Frederick	Purchased
272	NHMUK PI P 2282 (1)	1	hand specimen				Siphonia tulipa Zittel, 1878		Blackdown, Devon, England, United Kingdom	Cretaceous, Upper Greensand	History unrecorded
273	NHMUK PI P 3526	8	hand specimen				Siphonia tulipa Zittel, 1878		Blackdown, Devon, England, United Kingdom	Cretaceous, Upper Greensand	LEE, John Edward Collection, October 1885	Presented
274	NHMUK PI P 57	1	hand specimen				Siphonia tulipa Zittel, 1878		Blackdown, Devon, England, United Kingdom	Cretaceous, Upper Greensand	BRIGHT Collection
275	NHMUK PI P 7331	1	hand specimen				Siphonia tulipa Zittel, 1878		Blackdown, Devon, England, United Kingdom	Cretaceous, Albian	VICARY, William, Nov 1903	Presented
276	NHMUK PI S 5751	1	hand specimen				?Siphonia Goldfuss 1826		Black Ven, Dorset, England, United Kingdom	Cretaceous, Upper Greensand	LANG, William D., Feb 1949	Presented
277	NHMUK PI P 1365 (1)	2	hand specimen				Siphonia tulipa Zittel, 1878	Figured	Warminster, Wiltshire, England, United Kingdom	Cretaceous, Upper Greensand	History unrecorded		Hinde, G.J. 1884. Catalogue of the Fossil Sponges in the Geological Department of the British Museum (Natural History). With descriptions of new and little-known species. BM(NH), London, 248 pp. (on pl.13, fig. 2b)
278	NHMUK PI P 1355	1	hand specimen				?Siphonia Goldfuss 1826		Isle of Wight, England, United Kingdom	Cretaceous, Lower Chalk, Chalk Marl	FOX, Rev., May 1882
279	NHMUK PI P 1367	4	hand specimen				Siphonia tulipa Zittel, 1878		Wiltshire, England, United Kingdom	Cretaceous, Upper Greensand	BROWN, J.	Presented
280	NHMUK PI P 3235	1	hand specimen				?Siphonia Goldfuss 1826		Ventnor, Isle of Wight, England, United Kingdom	Cretaceous, Upper Greensand	History unrecorded
281	NHMUK PI P 3018	2	hand specimen				Siphonia tulipa Zittel, 1878	Figured	Pewsey, Wiltshire, England, United Kingdom	Cretaceous, Upper Greensand	SMITH, William, 1816	Purchased	Smith, W. 1816-1819. Strata identified by Organized Fossils, containing prints on cloured paper of the most characteristic specimens in each Stratum. London, 32 pp. (on pl. opp. p. 24)
282	NHMUK PI P 3019	0	hand specimen				Siphonia tulipa Zittel, 1878	Figured	Pewsey, Wiltshire, England, United Kingdom	Cretaceous, Upper Greensand	SMITH, William, 1816	Purchased	Smith, W. 1817. Stratigraphical system of organized Fossils. With reference to the specimens of the original geological collection in the British Museum, explaining their state of preservation and their use in identifying the British Strata. London, xi + 118 + [3] pp. (on pl. 1)
283	NHMUK PI S 152	1	hand specimen				?Siphonia Goldfuss 1826		Isle of Wight, England, United Kingdom	Cretaceous, Upper Greensand	GUNN, Dr R. Marcus, Nov 1909	Presented
284	NHMUK PI P 3020	1	hand specimen				Siphonia tulipa Zittel, 1878		Warminster, Wiltshire, England, United Kingdom	Cretaceous, Upper Greensand	VICARY, William, Oct 1884	Presented
285	NHMUK PI P 1365 (2)	5	hand specimen				Siphonia tulipa Zittel, 1878		Warminster, Wiltshire, England, United Kingdom	Cretaceous, Upper Greensand	History unrecorded
286	NHMUK PI P 7334	2	hand specimen				Siphonia tulipa Zittel, 1878	Figured	Blackdown, Devon, England, United Kingdom	Cretaceous, Albian	VICARY, William, Nov 1903	Presented	Sollas, W.J. 1877. On the structure and affinities of the genus Siphonia. Quarterly Journal of the Geological Society of London, 33: 790-834. (on pl.25, figs. 4, 4a, p.810)
287	NHMUK PI P 3234	5	hand specimen				Siphonia tulipa Zittel, 1878		Ventnor, Isle of Wight, England, United Kingdom	Cretaceous, Upper Greensand	History unrecorded
288	NHMUK PI P 1370 (8)	2	hand specimen				Siphonia tulipa Zittel, 1878		Warminster, Wiltshire, England, United Kingdom	Cretaceous, Upper Greensand	History unrecorded
289	NHMUK PI S 5769	1	hand specimen				Siphonia pyriformis Goldfuss, 1826		Ventnor, Isle of Wight, England, United Kingdom	Cretaceous, Upper Greensand	History unrecorded
290	NHMUK PI S 5770	1	hand specimen				Siphonia pyriformis Goldfuss, 1826		Ventnor, Isle of Wight, England, United Kingdom	Cretaceous, Upper Greensand	History unrecorded
291	NHMUK PI P 2282 (2)	2	hand specimen				Siphonia tulipa Zittel, 1878		Warminster, Wiltshire, England, United Kingdom	Cretaceous, Upper Greensand	Zoology Department, 1884
292	NHMUK PI P 3532	3	hand specimen				?Siphonia Goldfuss 1826		Ventnor, Isle of Wight, England, United Kingdom	Cretaceous, Upper Greensand	LEE, John Edward Collection, October 1885	Presented
293	NHMUK PI S 7581	1	hand specimen				?Siphonia Goldfuss 1826		Warminster, Wiltshire, England, United Kingdom	Cretaceous, Upper Greensand	History unrecorded
294	NHMUK PI P 1365 (3)	4	hand specimen				Siphonia tulipa Zittel, 1878		Wiltshire, England, United Kingdom	Cretaceous, Upper Greensand	History unrecorded
295	NHMUK PI P 1365 (4)	2	hand specimen				Siphonia tulipa Zittel, 1878		Warminster, Wiltshire, England, United Kingdom	Cretaceous, Upper Greensand	History unrecorded
296	NHMUK PI P 1365 (5)	2	hand specimen				Siphonia tulipa Zittel, 1878	Figured	Warminster, Wiltshire, England, United Kingdom	Cretaceous, Upper Greensand	History unrecorded		Hinde, G.J. 1884. Catalogue of the Fossil Sponges in the Geological Department of the British Museum (Natural History). With descriptions of new and little-known species. BM(NH), London, 248 pp. (on pl.13, fig. 2)
297	NHMUK PI P 1366 (1)	2	hand specimen				Siphonia tulipa Zittel, 1878		Wiltshire, England, United Kingdom	Cretaceous, Upper Greensand	LUDLAM, Henry, July 1871	Presented
298	NHMUK PI P 1365 (6)	9	hand specimen				Siphonia tulipa Zittel, 1878		Warminster, Wiltshire, England, United Kingdom	Cretaceous, Upper Greensand	History unrecorded
299	NHMUK PI P 1366 (2)	2	hand specimen				Siphonia tulipa Zittel, 1878	Figured	Warminster, Wiltshire, England, United Kingdom	Cretaceous, Upper Greensand	History unrecorded		Hinde, G.J. 1884. Catalogue of the Fossil Sponges in the Geological Department of the British Museum (Natural History). With descriptions of new and little-known species. BM(NH), London, 248 pp. (on pl.13, figs. 2a, 2c)
300	NHMUK PI P 1366 (1) $1	1	thin section				Siphonia tulipa Zittel, 1878	Figured	Warminster, Wiltshire, England, United Kingdom	Cretaceous, Upper Greensand	History unrecorded		Hinde, G.J. 1884. Catalogue of the Fossil Sponges in the Geological Department of the British Museum (Natural History). With descriptions of new and little-known species. BM(NH), London, 248 pp. (on pl.13, figs. 2a, 2c)
301	NHMUK PI OR 6029	1	hand specimen				?Siphonia Goldfuss 1826		Maidstone, Kent, England, United Kingdom	Cretaceous, Lower Greensand	History unrecorded
302	NHMUK PI P 1372 (1)	1	hand specimen				Siphonia tulipa Zittel, 1878		Blackdown, Devon, England, United Kingdom	Cretaceous, Greensand	History unrecorded
303	NHMUK PI P 7332	2	hand specimen				Siphonia tulipa Zittel, 1878	Figured	Blackdown, Devon, England, United Kingdom	Cretaceous, Albian	VICARY, William, Nov 1903	Presented	Sollas, W.J. 1877. On the structure and affinities of the genus Siphonia. Quarterly Journal of the Geological Society of London, 33: 790-834. (on pl.25, figs. 1, 1b, p.810)
304	NHMUK PI P 1387 (2)	1	hand specimen				Siphonia tulipa Zittel, 1878		Blackdown, Devon, England, United Kingdom	Cretaceous, Upper Greensand	CUNNINGTON Collection	Purchased
305	NHMUK PI P 4109	2	hand specimen				?Siphonia Goldfuss 1826		Blackdown, Devon, England, United Kingdom	Cretaceous, Upper Greensand	HARFORD, Frederick	Purchased
306	NHMUK PI P 7963	1	hand specimen				Siphonia tulipa Zittel, 1878		Blackdown, Devon, England, United Kingdom	Cretaceous, Albian	HUDSON Collection, 10 Jul 1907	Presented
307	NHMUK PI P 1386	1	hand specimen				?Siphonia Goldfuss 1826		Goslar, Hanover, Germany	Cretaceous, Upper Greensand, Senonian	CUNNINGTON Collection	Purchased
308	NHMUK PI P 7338	1	hand specimen				Siphonia tulipa Zittel, 1878		Blackdown, Devon, England, United Kingdom	Cretaceous, Albian	VICARY, William, Nov 1903	Presented
309	NHMUK PI P 7769	1	hand specimen				?Siphonia Goldfuss 1826	Cited	Blackdown, Devon, England, United Kingdom	Cretaceous, Albian	SCHULGE, Herr, 3 May 1906	Bequest	Woodward, H.B. 1906. Excursion to Lyme Regis, Easter, 1906. Proceedings of the Geologists' Association, 19: 320-340. (on p. 323)
310	NHMUK PI P 7335	1	hand specimen				Siphonia tulipa Zittel, 1878	Figured	Blackdown, Devon, England, United Kingdom	Cretaceous, Albian	VICARY, William, Nov 1903	Presented	Sollas, W.J. 1877. On the structure and affinities of the genus Siphonia. Quarterly Journal of the Geological Society of London, 33: 790-834. (on pl.25, fig. 8, p.810)
311	NHMUK PI P 1383 (1)	2	hand specimen				Siphonia pyriformis Goldfuss, 1826		Württemberg, Germany	Cretaceous, Upper Greensand	MOHR, Paul, 1848	Purchased
312	NHMUK PI S 8188	1	hand specimen				Siphonia tulipa Zittel, 1878		Blackdown, Devon, England, United Kingdom	Cretaceous, Upper Greensand	Dorset County Museum, July 1959	Donated
313	NHMUK PI S 8189	1	hand specimen				Siphonia tulipa Zittel, 1878		Blackdown, Devon, England, United Kingdom	Cretaceous, Upper Greensand	Dorset County Museum, July 1959	Donated
314	NHMUK PI S 8190	1	hand specimen				Siphonia tulipa Zittel, 1878		Blackdown, Devon, England, United Kingdom	Cretaceous, Upper Greensand	Dorset County Museum, July 1959	Donated
315	NHMUK PI S 5908	2	hand specimen				Siphonia tulipa Zittel, 1878		Blackdown, Devon, England, United Kingdom	Cretaceous, Upper Greensand	History unrecorded
316	NHMUK PI P 1387 (3)	1	hand specimen				Siphonia tulipa Zittel, 1878		Blackdown, Devon, England, United Kingdom	Cretaceous, Upper Greensand	CUNNINGTON Collection	Purchased
317	NHMUK PI S 4839	0	hand specimen				Siphonia tulipa Zittel, 1878	Figured	Blackdown, Devon, England, United Kingdom	Cretaceous, Upper Greensand	History unrecorded		Oakley, K.P. 1937. Cretaceous sponges: some biological and geological considerations. Proceedings of the Geologists' Association, 48: 330-348. (on fig. 6)
318	NHMUK PI P 1373	3	hand specimen				Siphonia tulipa Zittel, 1878		Blackdown, Devon, England, United Kingdom	Cretaceous, Albian	MANNS, E. J.
319	NHMUK PI P 7803	1	hand specimen				?Siphonia Goldfuss 1826		Haldon Hill, Exeter, Devon, England, United Kingdom	Cretaceous, Upper Greensand	BUTLER Collection	Purchased
320	NHMUK PI P 7336	1	hand specimen				Siphonia tulipa Zittel, 1878		Blackdown, Devon, England, United Kingdom	Cretaceous, Albian	VICARY, William, Nov 1903	Presented
321	NHMUK PI P 7330	1	hand specimen				Siphonia tulipa Zittel, 1878		Blackdown, Devon, England, United Kingdom	Cretaceous, Albian	VICARY, William, Nov 1903	Presented
322	NHMUK PI P 1374	2	hand specimen				Siphonia tulipa Zittel, 1878		Blackdown, Devon, England, United Kingdom	Cretaceous, Upper Greensand	BROWN, J.	Presented
323	NHMUK PI P 7474	1	hand specimen				Siphonia tulipa Zittel, 1878		Peak Hill, Sidmouth, Devon, England, United Kingdom	Cretaceous, Upper Greensand	METCALFE, H. F., May 1953	Donated
324	NHMUK PI P 7475	1	hand specimen				Siphonia tulipa Zittel, 1878		Peak Hill, Sidmouth, Devon, England, United Kingdom	Cretaceous, Upper Greensand	METCALFE, H. F., May 1953	Donated
325	NHMUK PI P 7476	1	hand specimen				Siphonia tulipa Zittel, 1878		Peak Hill, Sidmouth, Devon, England, United Kingdom	Cretaceous, Upper Greensand	METCALFE, H. F., May 1953	Donated
326	NHMUK PI P 7477	1	hand specimen				Siphonia tulipa Zittel, 1878		Peak Hill, Sidmouth, Devon, England, United Kingdom	Cretaceous, Upper Greensand	METCALFE, H. F., May 1953	Donated
327	NHMUK PI P 1371	6	hand specimen				Siphonia tulipa Zittel, 1878		Blackdown, Devon, England, United Kingdom	Cretaceous, Upper Greensand	BRIGHT Collection
328	NHMUK PI P 1372 (2)	6	hand specimen				Siphonia tulipa Zittel, 1878		Blackdown, Devon, England, United Kingdom	Cretaceous, Upper Greensand	SHARPE, J. Collection
329	NHMUK PI P 4193	4	hand specimen				Siphonia tulipa Zittel, 1878		Blackdown, Devon, England, United Kingdom	Cretaceous, Upper Greensand	BABER, Miss, 1889	Purchased
330	NHMUK PI P 1372 (3)	1	hand specimen				Siphonia tulipa Zittel, 1878		Blackdown, Devon, England, United Kingdom	Cretaceous, Upper Greensand	History unrecorded
331	NHMUK PI P 1370 (7)	12	hand specimen				Siphonia tulipa Zittel, 1878	Figured	Blackdown, Devon, England, United Kingdom	Cretaceous, Upper Greensand	History unrecorded		Sendino, C. 2020. The Natural History Museum Fossil Porifera Collection. Collections: A Journal for Museum and Archives Professionals, 16(4): 363-380. DOI: 10.1177/1550190620964042 (on fig 2 S)
332	NHMUK PI P 1622 (1)	6	hand specimen				Siphonia tulipa Zittel, 1878		Farrington, Lancashire, England, United Kingdom	Cretaceous, Upper Greensand	EGERTON Collection, 1882
333	NHMUK PI P 1622 (2)	7	hand specimen				Siphonia tulipa Zittel, 1878		Farrington, Lancashire, England, United Kingdom	Cretaceous, Upper Greensand	EGERTON Collection, 1882
334	NHMUK PI P 1622 (3)	7	hand specimen				Siphonia tulipa Zittel, 1878		Farrington, Lancashire, England, United Kingdom	Cretaceous, Upper Greensand	EGERTON Collection, 1882
335	NHMUK PI P 1387 (4)	1	hand specimen				Siphonia tulipa Zittel, 1878		Blackdown, Devon, England, United Kingdom	Cretaceous, Upper Greensand	CUNNINGTON Collection	Purchased
336	NHMUK PI P 1370 (6)	1	hand specimen				Siphonia tulipa Zittel, 1878	Figured	Blackdown, Devon, England, United Kingdom	Cretaceous, Upper Greensand	History unrecorded		Taylor, P.D. 1990. Eyewitness Guides. Fossil. London, 64 pp. (on p. 25)
337	NHMUK PI S 10830	1	hand specimen				Siphonia Goldfuss 1826?		Brighton, Sussex, England, United Kingdom	Cretaceous, Chalk Group, Upper Chalk, Senonian	History unrecorded
338	NHMUK PI P 1531 (29)	2	hand specimen				Siphonia koenigi (Mantell, 1822)		South of England	Cretaceous, Chalk Group, Upper Chalk	History unrecorded
339	NHMUK PI P 1531 (30)	2	hand specimen				Siphonia koenigi (Mantell, 1822)		South of England	Cretaceous, Chalk Group, Upper Chalk	History unrecorded
340	NHMUK PI P 1533 (3)	2	hand specimen				Siphonia koenigi (Mantell, 1822)		Sussex, England, United Kingdom	Cretaceous, Chalk Group	History unrecorded
341	NHMUK PI P 1531 (31)	2	hand specimen				Siphonia koenigi (Mantell, 1822)		South of England	Cretaceous, Chalk Group, Upper Chalk	SMITH, Joshua Toulmin, 1869	Purchased
342	NHMUK PI P 1531 (32)	3	hand specimen				Siphonia koenigi (Mantell, 1822)		South of England	Cretaceous, Chalk Group, Upper Chalk	SMITH, Joshua Toulmin, 1869	Purchased
343	NHMUK PI P 1417 (3)	1	hand specimen				Siphonia koenigi (Mantell, 1822)		South of England	Cretaceous, Chalk Group, Upper Chalk	SMITH, Joshua Toulmin, 1869	Purchased
344	NHMUK PI P 1531 (33)	1	hand specimen				Siphonia koenigi (Mantell, 1822)		South of England	Cretaceous, Chalk Group, Upper Chalk	SMITH, Joshua Toulmin, 1869	Purchased
345	NHMUK PI P 1531 (34)	3	hand specimen				Siphonia koenigi (Mantell, 1822)		South of England	Cretaceous, Chalk Group, Upper Chalk	SMITH, Joshua Toulmin, 1869	Purchased
346	NHMUK PI P 1415 (4)	1	hand specimen				?Siphonia Goldfuss 1826		South of England	Cretaceous, Chalk Group, Upper Chalk	SMITH, Joshua Toulmin, 1869	Purchased
347	NHMUK PI P 7329	1	hand specimen				?Siphonia Goldfuss 1826		Blackdown, Devon, England, United Kingdom	Cretaceous, Albian	VICARY, William, Nov 1903	Presented
348	NHMUK PI P 1531 (35)	1	hand specimen				Siphonia koenigi (Mantell, 1822)		South of England	Cretaceous, Chalk Group, Upper Chalk	SMITH, Joshua Toulmin, 1869	Purchased
349	NHMUK PI P 1347	1	hand specimen				Phymatella reticulata Hinde, 1884		Flamborough, Yorkshire, England, United Kingdom	Cretaceous, Chalk Group, Upper Chalk	History unrecorded
350	NHMUK PI P 3558 (1)	1	hand specimen				Phymatella reticulata Hinde, 1884		Flamborough, Yorkshire, England, United Kingdom	Cretaceous, Chalk Group, Upper Chalk	LEE, John Edward Collection, October 1885	Presented
351	NHMUK PI P 1346	1	hand specimen				Phymatella reticulata Hinde, 1884		Flamborough, Yorkshire, England, United Kingdom	Cretaceous, Chalk Group, Upper Chalk	History unrecorded
352	NHMUK PI P 1348 (1)	2	hand specimen				Phymatella reticulata Hinde, 1884	Figured	Flamborough, Yorkshire, England, United Kingdom	Cretaceous, Chalk Group, Upper Chalk	History unrecorded		Hinde, G.J. 1884. Catalogue of the Fossil Sponges in the Geological Department of the British Museum (Natural History). With descriptions of new and little-known species. BM(NH), London, 248 pp. (on p. 59, pl.11, fig. 1)
353	NHMUK PI P 1348 (2)	4	hand specimen				Phymatella reticulata Hinde, 1884	Figured	Flamborough, Yorkshire, England, United Kingdom	Cretaceous, Chalk Group, Upper Chalk	History unrecorded		Hinde, G.J. 1884. Catalogue of the Fossil Sponges in the Geological Department of the British Museum (Natural History). With descriptions of new and little-known species. BM(NH), London, 248 pp. (on p. 59, pl.11, fig. 1a)
354	NHMUK PI P 3558 (2)	1	hand specimen				Phymatella reticulata Hinde, 1884	Figured	Flamborough, Yorkshire, England, United Kingdom	Cretaceous, Chalk Group, Upper Chalk	History unrecorded		Lee, J.E. 1839. Notice of undescribed zoophytes from the Yorkshire Chalk. Magazine of Natural History, New Series, 3: 10-17. (on p. 13 as P. catablastes). Holotype?
355	NHMUK PI P 3559 (9)	1	hand specimen				Stichophyma tumidum Hinde, 1884		Flamborough, Yorkshire, England, United Kingdom	Cretaceous, Chalk Group, Upper Chalk	LEE, John Edward Collection, October 1885	Presented
356	NHMUK PI S 6179	1	hand specimen				?Phymatella Zittel, 1878		West of Sewerby, Yorkshire, England, United Kingdom	Cretaceous, Chalk Group	WRIGHT, Claud William & WRIGHT, E. V., Dec 1949	Donated
357	NHMUK PI S 6181	2	hand specimen				Phymatella reticulata Hinde, 1884		Sewerby-Dane's Dyke, Yorkshire, England United Kingdom	Cretaceous, Chalk Group, Upper Chalk	WRIGHT, Claud William & WRIGHT, E. V., Dec 1949	Donated
358	NHMUK PI S 6178	1	hand specimen				Phymatella reticulata Hinde, 1884		Sewerby-Dane's Dyke, Yorkshire, England United Kingdom	Cretaceous, Chalk Group	WRIGHT, Claud William & WRIGHT, E. V., Dec 1949	Donated
359	NHMUK PI S 7540	1	hand specimen				Phymatella reticulata Hinde, 1884		Hornhill Quarry, Lund, Driffield, Yorkshire, England, United Kingdom	Cretaceous, Chalk Group	British Museum, May 1953	Transferred
360	NHMUK PI S 6180	1	hand specimen				Phymatella reticulata Hinde, 1884		Sewerby-Dane's Dyke, Yorkshire, England United Kingdom	Cretaceous, Chalk Group	WRIGHT, Claud William & WRIGHT, E. V., Dec 1949	Donated
361	NHMUK PI S 6195	1	hand specimen				Phymatella reticulata Hinde, 1884		Sewerby-Dane's Dyke, Yorkshire, England United Kingdom	Cretaceous, Chalk Group, Upper Chalk, Senonian	WRIGHT, Claud William & WRIGHT, E. V., Dec 1949	Donated
362	NHMUK PI P 1348 (3)	1	hand specimen				Phymatella reticulata Hinde, 1884		Flamborough, Yorkshire, England, United Kingdom	Cretaceous, Chalk Group, Upper Chalk	History unrecorded
363	NHMUK PI S 7542	1	hand specimen				?Phymatella Zittel, 1878		Hornhill Quarry, Lund, Driffield, Yorkshire, England, United Kingdom	Cretaceous, Chalk Group	British Museum, May 1953	Transferred
364	NHMUK PI S 9353	1	hand specimen				?Phymatella Zittel, 1878		Flamborough, Yorkshire, England, United Kingdom	Cretaceous, Chalk Group, Upper Chalk	History unrecorded
365	NHMUK PI P 1345	5	hand specimen				Phymatella reticulata Hinde, 1884		South of England	Cretaceous, Chalk Group, Upper Chalk	SMITH, Joshua Toulmin, 1869	Purchased
366	NHMUK PI P 1348 (4)	1	hand specimen				Phymatella reticulata Hinde, 1884		Flamborough, Yorkshire, England, United Kingdom	Cretaceous, Chalk Group, Upper Chalk	History unrecorded
367	NHMUK PI P 3558 (3)	1	hand specimen				Phymatella reticulata Hinde, 1884		Flamborough, Yorkshire, England, United Kingdom	Cretaceous, Chalk Group, Upper Chalk	LEE, John Edward Collection, October 1885	Presented
368	NHMUK PI P 1342	1	hand specimen				Phymatella intumescens (Roemer, 1864)		England, United Kingdom	Cretaceous, Chalk Group, Upper Chalk	History unrecorded
369	NHMUK PI P 1537 (2)	2	hand specimen				?Phymatella Zittel, 1878		Sussex, England, United Kingdom	Cretaceous, Chalk Group, Upper Chalk	History unrecorded
370	NHMUK PI P 1344 (1)	3	hand specimen				?Phymatella Zittel, 1878		England, United Kingdom	Cretaceous, Chalk Group, Upper Chalk	History unrecorded
371	NHMUK PI P 1343	2	hand specimen				?Phymatella Zittel, 1878		Dover, Kent, England, United Kingdom	Cretaceous, Chalk Group, Grey Chalk	History unrecorded
372	NHMUK PI P 1343 $1	1	thin section				?Phymatella Zittel, 1878		Dover, Kent, England, United Kingdom	Cretaceous, Chalk Group, Grey Chalk	History unrecorded
373	NHMUK PI P 1344 (2)	2	hand specimen				?Phymatella Zittel, 1878		England, United Kingdom	Cretaceous, Chalk Group, Upper Chalk	History unrecorded
374	NHMUK PI P 1340	2	hand specimen				Phymatella nodosa Hinde, 1884	Figured	Pewsey, Wiltshire, England, United Kingdom	Cretaceous, Upper Greensand	History unrecorded		Hinde, G.J. 1884. Catalogue of the Fossil Sponges in the Geological Department of the British Museum (Natural History). With descriptions of new and little-known species. BM(NH), London, 248 pp. (on p. 59, pl.11, figs. 2, 2a)
375	NHMUK PI S 10500	1	hand specimen				Lithistida Schmidt, 1870		Unrecorded	Cretaceous, Chalk Group, Upper Chalk	History unrecorded
376	NHMUK PI P 1773	2	hand specimen				?Plinthosella Zittel, 1878		Budleigh Salterton, Devon, England, United Kingdom	Cretaceous, Chalk Group, Upper Chalk	CARTER, Henry John Collection	Donated
377	NHMUK PI P 3928	1	hand specimen				?Plinthosella Zittel, 1878		Budleigh Salterton, Devon, England, United Kingdom	Cretaceous, Chalk Group, Upper Chalk	CARTER, Henry John Dr, Sep 1887	Donated
378	NHMUK PI P 7002	3	hand specimen				?Plinthosella Zittel, 1878		Seaford, Sussex, England, United Kingdom	Cretaceous, Chalk Group, Upper Chalk	MARTIN, S. B., Nov 1950
379	NHMUK PI P 1514	5	hand specimen				?Plinthosella Zittel, 1878		South of England	Cretaceous, Chalk Group, Upper Chalk	History unrecorded
380	NHMUK PI S 10501	88	hand specimen				?Plinthosella Zittel, 1878		South of England	Cretaceous, Chalk Group	HINDE, Dr. George Jennings, 1918	Presented
381	NHMUK PI P 4200	1	hand specimen				Plinthosella compacta Hinde, 1884		Ventnor, Isle of Wight, England, United Kingdom	Cretaceous, Chalk Group, Upper Chalk	LANGDALE, Rev. H. M.
382	NHMUK PI P 1509	5	hand specimen				Plinthosella nodosa (Hinde, 1884)		Chilmark, Wiltshire, England, United Kingdom	Cretaceous, Chalk Group, Upper Chalk	History unrecorded
383	NHMUK PI S 9817	1	hand specimen		P 1509	BM(NH) number	Plinthosella nodosa (Hinde, 1884)		Oare, Wiltshire, England, United Kingdom	Cretaceous, Chalk Group, Upper Chalk	History unrecorded
384	NHMUK PI S 9818	1	hand specimen		P 1509	BM(NH) number	Plinthosella nodosa (Hinde, 1884)		Oare, Wiltshire, England, United Kingdom	Cretaceous, Chalk Group, Upper Chalk	History unrecorded
385	NHMUK PI P 1508 (1)	1	hand specimen				Plinthosella convoluta Hinde, 1884		Wiltshire, England, United Kingdom	Cretaceous, Chalk Group, Upper Chalk	History unrecorded
386	NHMUK PI P 1774 (1)	1	hand specimen				Plinthosella squamosa Zittel, 1878	Figured	South West England	Cretaceous, Chalk Group, Upper Chalk	CARTER, Henry John, 1883	Donated	Hinde, G.J. 1884. Catalogue of the Fossil Sponges in the Geological Department of the British Museum (Natural History). With descriptions of new and little-known species. BM(NH), London, 248 pp. (on pl.20, fig. 2)
387	NHMUK PI P 1774 (3)	1	hand specimen				Plinthosella squamosa Zittel, 1878	Cited	South West England	Cretaceous, Chalk Group, Upper Chalk	CARTER, Henry John, 1883	Donated	Hinde, G.J. 1884. Catalogue of the Fossil Sponges in the Geological Department of the British Museum (Natural History). With descriptions of new and little-known species. BM(NH), London, 248 pp. (p. 85)
388	NHMUK PI P 1774 (2)	1	hand specimen				Plinthosella squamosa Zittel, 1878	Cited	South West England	Cretaceous, Chalk Group, Upper Chalk	CARTER, Henry John, 1883	Donated	Hinde, G.J. 1884. Catalogue of the Fossil Sponges in the Geological Department of the British Museum (Natural History). With descriptions of new and little-known species. BM(NH), London, 248 pp. (p. 85)
389	NHMUK PI P 1398	4	hand specimen				Plinthosella squamosa Zittel, 1878		Broadstairs, Kent, England, United Kingdom	Cretaceous, Chalk Group, Upper Chalk	BURNETT, Mrs., May 1882	Presented
390	NHMUK PI S 7889	1	hand specimen				Plinthosella squamosa Zittel, 1878		Kingsgate Castle, Kent, England, United Kingdom	Cretaceous, Chalk Group, Upper Chalk	ROWE, Arthur Walter, Nov 1926	Purchased
391	NHMUK PI P 1510	3	hand specimen				Plinthosella squamosa Zittel, 1878		South of England	Cretaceous, Chalk Group, Upper Chalk	History unrecorded
392	NHMUK PI P 7397	1	hand specimen				Plinthosella squamosa Zittel, 1878		Commonwood Common, Sarratt, Hertfordshire, England, United Kingdom	Cretaceous, Chalk Group, Upper Chalk	TOOMBS, H. A., Nov 1953	Presented
393	NHMUK PI P 1511	8	hand specimen				Plinthosella squamosa Zittel, 1878		Wells, Norfolk, England, United Kingdom	Cretaceous, Chalk Group, Upper Chalk	WOODWARD, H. Collection	Donated
394	NHMUK PI P 1772	4	hand specimen				Plinthosella squamosa Zittel, 1878		Sidmouth Hill, Devon, England, United Kingdom	Cretaceous, Chalk Group, Upper Chalk	CARTER, Henry John, Feb 1883	Donated
395	NHMUK PI S 5750	1	hand specimen				Plinthosella squamosa Zittel, 1878		Youngsbury, Hertfordshire, England, United Kingdom	Cretaceous, Chalk Group, Upper Chalk	PRIOR, C., Nov 1949	Donated
396	NHMUK PI S 5240	3	hand specimen				Plinthosella squamosa Zittel, 1878		Selsey Bill, Sussex, England, United Kingdom	Cretaceous, Chalk Group, Upper Chalk	HERON-ALLEN, Edward & Sarland Collection, transferred from Zoology Dept., Sep 1946	Transferred
397	NHMUK PI P 1508 (2)	2	hand specimen				Phymaplectia scitula Hinde		Wiltshire, England, United Kingdom	Cretaceous, Chalk Group, Upper Chalk	History unrecorded
398	NHMUK PI S 9819	1	hand specimen				Phymaplectia irregularis Hinde, 1884		Wiltshire, England, United Kingdom	Cretaceous, Chalk Group, Upper Chalk	History unrecorded
399	NHMUK PI P 1508 (3)	2	hand specimen				Phymaplectia irregularis Hinde, 1884	Figured	Wiltshire, England, United Kingdom	Cretaceous, Chalk Group, Upper Chalk	History unrecorded		Hinde, G.J. 1884. Catalogue of the Fossil Sponges in the Geological Department of the British Museum (Natural History). With descriptions of new and little-known species. BM(NH), London, 248 pp. (on pl.21, fig. 1, 1a)
400	NHMUK PI S 8065	1	hand specimen				Hallirhoa agariciformis (Benett, 1831)		Woody Point, St. Lawrence, Isle of Wight, England United Kingdom	Cretaceous, Lower Cenomanian	OWEN, H. G., Dec 1959	Presented
401	NHMUK PI P 3641	1	hand specimen				Hallirhoa agariciformis (Benett, 1831)		Weymouth, Dorset, England, United Kingdom	Cretaceous, Upper Greensand	GARDNER, J. S., 1886	Purchased
402	NHMUK PI S 8209	1	hand specimen				Hallirhoa agariciformis (Benett, 1831)		St. Lawrence, Isle of Wight, England United Kingdom	Cretaceous, Upper Greensand	FORD, R. L. E., Nov 1959	Presented
403	NHMUK PI P 3239	1	hand specimen				Hallirhoa agariciformis (Benett, 1831)		Ventnor, Isle of Wight, England, United Kingdom	Cretaceous, Upper Greensand	History unrecorded
404	NHMUK PI S 5674	1	hand specimen				Hallirhoa agariciformis (Benett, 1831)		Punfield Cove, Dorset, England, United Kingdom	Cretaceous, Albian	WRIGHT, Claud William & WRIGHT, E. V., Jun 1948	Donated
405	NHMUK PI S 5676	1	hand specimen				Hallirhoa agariciformis (Benett, 1831)		Durdle Cove, Dorset, England, United Kingdom	Cretaceous, Albian	WRIGHT, Claud William & WRIGHT, E. V., Jun 1948	Donated
406	NHMUK PI P 4185 (1)	1	hand specimen				Hallirhoa agariciformis (Benett, 1831)		Warminster, Wiltshire, England, United Kingdom	Cretaceous, Upper Greensand	BABER, Mrs., May 1889	Purchased
407	NHMUK PI P 4185 (2)	1	hand specimen				Hallirhoa agariciformis (Benett, 1831)		Warminster, Wiltshire, England, United Kingdom	Cretaceous, Upper Greensand	BABER, Mrs., May 1889	Purchased
408	NHMUK PI P 1439	1	hand specimen				Hallirhoa agariciformis (Benett, 1831)	Figured	Warminster, Wiltshire, England, United Kingdom	Cretaceous, Upper Greensand	History unrecorded		Hinde, G.J. 1884. Catalogue of the Fossil Sponges in the Geological Department of the British Museum (Natural History). With descriptions of new and little-known species. BM(NH), London, 248 pp. (on pl.15, fig. 1a)
409	NHMUK PI P 1445 (1)	3	hand specimen				Hallirhoa agariciformis (Benett, 1831)		Warminster, Wiltshire, England, United Kingdom	Cretaceous, Upper Greensand	History unrecorded
410	NHMUK PI P 1445 (2)	2	hand specimen		48161	BM(NH) number	Hallirhoa agariciformis (Benett, 1831)		Warminster, Wiltshire, England, United Kingdom	Cretaceous, Upper Greensand	History unrecorded
411	NHMUK PI P 1444	2	hand specimen				Hallirhoa agariciformis (Benett, 1831)		Isle of Wight, England, United Kingdom	Cretaceous, Upper Greensand	History unrecorded
412	NHMUK PI P 1445 (3)	1	hand specimen				Hallirhoa agariciformis (Benett, 1831)	Figured	Warminster, Wiltshire, England, United Kingdom	Cretaceous, Upper Greensand	History unrecorded		Hinde, G.J. 1884. Catalogue of the Fossil Sponges in the Geological Department of the British Museum (Natural History). With descriptions of new and little-known species. BM(NH), London, 248 pp. (on pl.15, fig. 1)
413	NHMUK PI P 1445 (4)	2	hand specimen		48161	BM(NH) number	Hallirhoa agariciformis (Benett, 1831)		Warminster, Wiltshire, England, United Kingdom	Cretaceous, Upper Greensand	History unrecorded
414	NHMUK PI P 3522	1	hand specimen				Hallirhoa agariciformis (Benett, 1831)		Warminster, Wiltshire, England, United Kingdom	Cretaceous, Upper Greensand	LEE, John Edward Collection, October 1885	Presented
415	NHMUK PI P 4874	1	hand specimen		P 4185	BM(NH) number	Hallirhoa agariciformis (Benett, 1831)		Warminster, Wiltshire, England, United Kingdom	Cretaceous, Upper Greensand	BABER, Mrs., May 1889	Purchased
416	NHMUK PI P 4185 (3)	2	hand specimen				Hallirhoa agariciformis (Benett, 1831)		Warminster, Wiltshire, England, United Kingdom	Cretaceous, Upper Greensand	BABER, Mrs., May 1889	Purchased
417	NHMUK PI P 1445 (5)	1	hand specimen				Hallirhoa agariciformis (Benett, 1831)		Warminster, Wiltshire, England, United Kingdom	Cretaceous, Upper Greensand	History unrecorded
418	NHMUK PI P 1445 (6)	2	hand specimen		5976 & 48161	BM(NH) number	Hallirhoa agariciformis (Benett, 1831)		Warminster, Wiltshire, England, United Kingdom	Cretaceous, Upper Greensand	History unrecorded
419	NHMUK PI P 1445 (7)	1	hand specimen				Hallirhoa agariciformis (Benett, 1831)		Warminster, Wiltshire, England, United Kingdom	Cretaceous, Upper Greensand	History unrecorded
420	NHMUK PI P 1442	1	hand specimen				Hallirhoa agariciformis (Benett, 1831)		Warminster, Wiltshire, England, United Kingdom	Cretaceous, Upper Greensand	SHARPE, J. Collection
421	NHMUK PI P 1445 (8)	5	hand specimen		48161	BM(NH) number	Hallirhoa agariciformis (Benett, 1831)		Warminster, Wiltshire, England, United Kingdom	Cretaceous, Upper Greensand	History unrecorded
422	NHMUK PI P 1445 (9)	2	hand specimen				Hallirhoa agariciformis (Benett, 1831)		Warminster, Wiltshire, England, United Kingdom	Cretaceous, Upper Greensand	History unrecorded
423	NHMUK PI P 1445 (10)	2	hand specimen				Hallirhoa agariciformis (Benett, 1831)		Warminster, Wiltshire, England, United Kingdom	Cretaceous, Upper Greensand	History unrecorded
424	NHMUK PI P 1428	1	hand specimen				Hallirhoa costata var. elevata Hinde, 1884	Holotype	Warminster, Wiltshire, England, United Kingdom	Cretaceous, Upper Greensand	History unrecorded		Hinde, G.J. 1884. Catalogue of the Fossil Sponges in the Geological Department of the British Museum (Natural History). With descriptions of new and little-known species. BM(NH), London, 248 pp. (on pl.14, fig. 3)
425	NHMUK PI P 1429	1	hand specimen				Hallirhoa costata var. brevicosta Michelin, 1847	Figured	Warminster, Wiltshire, England, United Kingdom	Cretaceous, Upper Greensand	History unrecorded		Hinde, G.J. 1884. Catalogue of the Fossil Sponges in the Geological Department of the British Museum (Natural History). With descriptions of new and little-known species. BM(NH), London, 248 pp. (on pl.14, fig. 2)
426	NHMUK PI P 3238	1	hand specimen				Hallirhoa costata Lamouroux, 1821	Figured	Warminster, Wiltshire, England, United Kingdom	Cretaceous, Upper Greensand	ETHERIDGE, Robert, 1869	Purchased	Hinde, G.J. 1884. Catalogue of the Fossil Sponges in the Geological Department of the British Museum (Natural History). With descriptions of new and little-known species. BM(NH), London, 248 pp. (on pl.14, fig. 1d)
427	NHMUK PI P 1434 (1)	1	hand specimen				Hallirhoa costata Lamouroux, 1821	Figured	Warminster, Wiltshire, England, United Kingdom	Cretaceous, Upper Greensand	History unrecorded		Hinde, G.J. 1884. Catalogue of the Fossil Sponges in the Geological Department of the British Museum (Natural History). With descriptions of new and little-known species. BM(NH), London, 248 pp. (on pl.14, fig. 1)
428	NHMUK PI P 1436 (1)	6	hand specimen				Hallirhoa costata Lamouroux, 1821		Warminster, Wiltshire, England, United Kingdom	Cretaceous, Upper Greensand	BROWN, J.	Presented
429	NHMUK PI P 1434 (2)	13	hand specimen				Hallirhoa costata Lamouroux, 1821		Warminster, Wiltshire, England, United Kingdom	Cretaceous, Upper Greensand	History unrecorded
430	NHMUK PI OR 48174 (1)	2	hand specimen				Hallirhoa costata Lamouroux, 1821	Figured	Warminster, Wiltshire, England, United Kingdom	Cretaceous, Upper Greensand	History unrecorded		Hinde, G.J. 1884. Catalogue of the Fossil Sponges in the Geological Department of the British Museum (Natural History). With descriptions of new and little-known species. BM(NH), London, 248 pp. (on pl.14, fig. 1a)
431	NHMUK PI P 1434 (3)	1	hand specimen				Hallirhoa costata Lamouroux, 1821		Warminster, Wiltshire, England, United Kingdom	Cretaceous, Upper Greensand	History unrecorded
432	NHMUK PI OR 48174 (2)	1	hand specimen				Hallirhoa costata Lamouroux, 1821	Figured	Warminster, Wiltshire, England, United Kingdom	Cretaceous, Upper Greensand	History unrecorded		Hinde, G.J. 1884. Catalogue of the Fossil Sponges in the Geological Department of the British Museum (Natural History). With descriptions of new and little-known species. BM(NH), London, 248 pp. (on pl.14, fig. 1b).	Sendino, C. 2020. The Natural History Museum Fossil Porifera Collection. Collections: A Journal for Museum and Archives Professionals, 16(4): 363-380. DOI: 10.1177/1550190620964042 (on fig. 2M)
433	NHMUK PI OR 48174 (3)	6	hand specimen				Hallirhoa costata Lamouroux, 1821	Figured	Warminster, Wiltshire, England, United Kingdom	Cretaceous, Upper Greensand	History unrecorded		Hinde, G.J. 1884. Catalogue of the Fossil Sponges in the Geological Department of the British Museum (Natural History). With descriptions of new and little-known species. BM(NH), London, 248 pp. (on pl. 3, figs. 1, 1a, 1b)
434	NHMUK PI OR 48174 (4)	1	hand specimen				Hallirhoa costata Lamouroux, 1821	Figured	Warminster, Wiltshire, England, United Kingdom	Cretaceous, Upper Greensand	History unrecorded		Oakley, K.P. 1937. Cretaceous sponges: some biological and geological considerations. Proceedings of the Geologists' Association, 48: 330-348. (on pl. 32, fig. 6).
435	NHMUK PI OR 48174 (5)	6	hand specimen				Hallirhoa costata Lamouroux, 1821	Figured	Warminster, Wiltshire, England, United Kingdom	Cretaceous, Upper Greensand	History unrecorded		Sendino, C. 2020. The Natural History Museum Fossil Porifera Collection. Collections: A Journal for Museum and Archives Professionals, 16(4): 363-380. DOI: 10.1177/1550190620964042 (on Fig. 2 D)
436	NHMUK PI OR 48174 (6)	2	hand specimen				Hallirhoa costata Lamouroux, 1821	Figured	Warminster, Wiltshire, England, United Kingdom	Cretaceous, Upper Greensand	History unrecorded		Hinde, G.J. 1882. Notes on Fossil Calcispongiae, with Descriptions of New Species. Annals and Magazine of Natural History, Series 5, 10: 185-206. (on pl. 9, figs. 3a, 3b)
437	NHMUK PI OR 48174 (7)	1	hand specimen				Hallirhoa costata Lamouroux, 1821	Cited	Warminster, Wiltshire, England, United Kingdom	Cretaceous, Upper Greensand	History unrecorded		Schrammen, A. 1924. Die Kieselspongien der oberen Kreide von Nordwestdeutschland. III. und letzter Teil. Monographien zur Geologie und Palaeontologie, Serie 1, 2: 159 pp. (on p. 57)
438	NHMUK PI P 1434 (4)	1	hand specimen				Hallirhoa costata Lamouroux, 1821	Cited	Warminster, Wiltshire, England, United Kingdom	Cretaceous, Upper Greensand	History unrecorded		Schrammen, A. 1924. Die Kieselspongien der oberen Kreide von Nordwestdeutschland. III. und letzter Teil. Monographien zur Geologie und Palaeontologie, Serie 1, 2: 159 pp. (on p. 97)
439	NHMUK PI P 1434 (5)	6	hand specimen				Hallirhoa costata Lamouroux, 1821	Cited	Warminster, Wiltshire, England, United Kingdom	Cretaceous, Upper Greensand	History unrecorded		Schrammen, A. 1924. Die Kieselspongien der oberen Kreide von Nordwestdeutschland. III. und letzter Teil. Monographien zur Geologie und Palaeontologie, Serie 1, 2: 159 pp. (on p. 97)
440	NHMUK PI P 1434 (6)	1	hand specimen				Hallirhoa costata Lamouroux, 1821	Cited	Warminster, Wiltshire, England, United Kingdom	Cretaceous, Upper Greensand	History unrecorded		Schrammen, A. 1924. Zur Revision der Jura-Spongian von Süddeutschland. Jahresbericht und Mitteilungen des Oberrheinischen Geologischen Vereins, New series, 13: 125-154.
441	NHMUK PI P 1434 (7)	1	hand specimen				Hallirhoa costata Lamouroux, 1821	Figured	Warminster, Wiltshire, England, United Kingdom	Cretaceous, Upper Greensand	History unrecorded		Sendino, C. 2020. The Natural History Museum Fossil Porifera Collection. Collections: A Journal for Museum and Archives Professionals, 16(4): 363-380. DOI: 10.1177/1550190620964042 (on Fig. 2 F)
442	NHMUK PI P 1434 (8)	3	hand specimen				Hallirhoa costata Lamouroux, 1821	Cited	Warminster, Wiltshire, England, United Kingdom	Cretaceous, Upper Greensand	History unrecorded		Oakley, K.P. 1942. Flexible sponges of Oligocene age from Ukraine. Proceedings of the Geologists' Association, 53: 106-107.(p. 6)
443	NHMUK PI P 1434 (9)	1	hand specimen				Hallirhoa costata Lamouroux, 1821		Warminster, Wiltshire, England, United Kingdom	Cretaceous, Upper Greensand	History unrecorded
444	NHMUK PI P 1436 (2)	5	hand specimen				Hallirhoa costata Lamouroux, 1821		Warminster, Wiltshire, England, United Kingdom	Cretaceous, Upper Greensand	BROWN, J.	Presented
445	NHMUK PI P 1430 (1)	1	hand specimen				Hallirhoa costata Lamouroux, 1821		Warminster, Wiltshire, England, United Kingdom	Cretaceous, Upper Greensand	MANTELL, Gideon Algernon, 1839	Purchased
446	NHMUK PI P 1430 (2)	1	hand specimen				Hallirhoa costata Lamouroux, 1821		Warminster, Wiltshire, England, United Kingdom	Cretaceous, Upper Greensand	History unrecorded
447	NHMUK PI P 1430 (3)	1	hand specimen				Hallirhoa costata Lamouroux, 1821		Warminster, Wiltshire, England, United Kingdom	Cretaceous, Upper Greensand	History unrecorded
448	NHMUK PI P 1434 (10)	1	hand specimen				Hallirhoa costata Lamouroux, 1821		Warminster, Wiltshire, England, United Kingdom	Cretaceous, Upper Greensand	History unrecorded
449	NHMUK PI OR 11620	1	hand specimen				Hallirhoa costata Lamouroux, 1821		Charnmouth, Dorset, England, United Kingdom	Cretaceous, Upper Greensand	SWINSLOW, Mrs. A.
450	NHMUK PI P 4743 (1)	1	hand specimen				Hallirhoa costata Lamouroux, 1821		Warminster, Wiltshire, England, United Kingdom	Cretaceous, Upper Greensand	Zoology Department, 1884	Transferred
451	NHMUK PI P 4192	3	hand specimen				Hallirhoa costata Lamouroux, 1821		Warminster, Wiltshire, England, United Kingdom	Cretaceous, Upper Greensand	BABER, Mrs., May 1889	Purchased
452	NHMUK PI P 1432	2	hand specimen				Hallirhoa costata Lamouroux, 1821		Warminster, Wiltshire, England, United Kingdom	Cretaceous, Upper Greensand	CUNNINGTON Collection	Purchased
453	NHMUK PI P 3523	1	hand specimen				Hallirhoa costata Lamouroux, 1821		Warminster, Wiltshire, England, United Kingdom	Cretaceous, Upper Greensand	LEE, John Edward Collection, October 1885	Presented
454	NHMUK PI S 8172	1	hand specimen				Hallirhoa costata Lamouroux, 1821		Folkestone, Kent, England, United Kingdom	Cretaceous, Upper Greensand	Dorset County Museum, July 1959	Donated
455	NHMUK PI S 8173	1	hand specimen				Hallirhoa costata Lamouroux, 1821		Folkestone, Kent, England, United Kingdom	Cretaceous, Upper Greensand	Dorset County Museum, July 1959	Donated
456	NHMUK PI P 1433 (1)	2	hand specimen				Hallirhoa costata Lamouroux, 1821		Warminster, Wiltshire, England, United Kingdom	Cretaceous, Upper Greensand	History unrecorded
457	NHMUK PI P 1433 (2)	2	hand specimen		54338 & 55126	BM(NH) number	Hallirhoa costata Lamouroux, 1821		Warminster, Wiltshire, England, United Kingdom	Cretaceous, Upper Greensand	LUDLAM, Henry, July 1871	Presented
458	NHMUK PI P 1435	1	hand specimen				Hallirhoa costata Lamouroux, 1821		Warminster, Wiltshire, England, United Kingdom	Cretaceous, Upper Greensand	BRIGHT Collection
459	NHMUK PI P 4743 (2)	1	hand specimen				Hallirhoa costata Lamouroux, 1821		Warminster, Wiltshire, England, United Kingdom	Cretaceous, Upper Greensand	Zoology Department, 1884	Transferred
460	NHMUK PI P 1339	1	hand specimen				Aulaxinia sulcifera (Roemer, 1864)		Folkestone, Kent, England, United Kingdom	Cretaceous, Chalk Group, Upper Chalk	BROWN, J.	Presented
461	NHMUK PI S 4398	1	hand specimen				Aulaxinia costata Hinde, 1884		Wandridge, Surrey, England, United Kingdom	Cretaceous, Chalk Group	JOHNSTON, Miss. M. S., Oct 1936	Presented
462	NHMUK PI OR 12104	1	hand specimen				Aulaxinia costata Hinde, 1884		Near Beeston Regis Church, Sheringham, Norfold, England, United Kingdom	Cretaceous, Chalk Group	FLETCHER, Mrs. D. K., 1991
463	NHMUK PI S 179	1	hand specimen				Aulaxinia costata Hinde, 1884		Kempston, Bedfordshire, England, United Kingdom	Cretaceous, Chalk Group	CRICK, G. C., 22 Feb 1910	Donated
464	NHMUK PI S 4399	1	hand specimen				Aulaxinia costata Hinde, 1884		South of England	Cretaceous, Chalk Group	SANDERSON, I. T., Oct, 1936	Presented
465	NHMUK PI P 3969	2	hand specimen				Aulaxinia costata Hinde, 1884		Clarendon, Wiltshire, England, United Kingdom	Cretaceous, Chalk Group	BRODIE, Rev. P. B.
466	NHMUK PI P 1338	1	hand specimen				Aulaxinia costata Hinde, 1884	Figured	Stanway, Gloucestershire, England, United Kingdom	Cretaceous, Chalk Group	BROWN, J.	Presented	Hinde, G.J. 1884. Catalogue of the Fossil Sponges in the Geological Department of the British Museum (Natural History). With descriptions of new and little-known species. BM(NH), London, 248 pp. (on pl.12, fig. 1)
467	NHMUK PI P 1506	1	hand specimen				Rhopalospongia obliqua Hinde, 1884	Figured	Warminster, Wiltshire, England, United Kingdom	Cretaceous, Upper Greensand	History unrecorded		Hinde, G.J. 1884. Catalogue of the Fossil Sponges in the Geological Department of the British Museum (Natural History). With descriptions of new and little-known species. BM(NH), London, 248 pp. (on pl.22, figs. 3, 3a)
468	NHMUK PI P 1507	12	hand specimen				Rhopalospongia gregaria (Benett, 1831)		Warminster, Wiltshire, England, United Kingdom	Cretaceous, Upper Greensand	BRIGHT Collection
469	NHMUK PI P 1505 (1)	3	hand specimen				Rhopalospongia gregaria (Benett, 1831)		Warminster, Wiltshire, England, United Kingdom	Cretaceous, Upper Greensand	History unrecorded
470	NHMUK PI P 1505 (1) $1	1	thin section				Rhopalospongia gregaria (Benett, 1831)		Warminster, Wiltshire, England, United Kingdom	Cretaceous, Upper Greensand	History unrecorded
471	NHMUK PI P 1505 (1) $2	1	thin section				Rhopalospongia gregaria (Benett, 1831)		Warminster, Wiltshire, England, United Kingdom	Cretaceous, Upper Greensand	History unrecorded
472	NHMUK PI P 1505 (2)	1	hand specimen				Rhopalospongia gregaria (Benett, 1831)		Warminster, Wiltshire, England, United Kingdom	Cretaceous, Upper Greensand	History unrecorded
473	NHMUK PI P 1505 (3)	2	hand specimen				Rhopalospongia gregaria (Benett, 1831)		Warminster, Wiltshire, England, United Kingdom	Cretaceous, Upper Greensand	History unrecorded
474	NHMUK PI P 1505 (4)	1	hand specimen				Rhopalospongia gregaria (Benett, 1831)		Wiltshire, England, United Kingdom	Cretaceous, Upper Greensand	History unrecorded
475	NHMUK PI P 1505 (5)	1	hand specimen				Rhopalospongia gregaria (Benett, 1831)		Vale of Pewsey, Wiltshire, England, United Kingdom	Cretaceous, Upper Greensand	History unrecorded
476	NHMUK PI P 1505 (6)	1	hand specimen				Rhopalospongia gregaria (Benett, 1831)		Warminster, Wiltshire, England, United Kingdom	Cretaceous, Upper Greensand	History unrecorded
477	NHMUK PI P 1505 (7)	2	hand specimen				Rhopalospongia gregaria (Benett, 1831)		Warminster, Wiltshire, England, United Kingdom	Cretaceous, Upper Greensand	History unrecorded
478	NHMUK PI P 1505 (8)	4	hand specimen				Rhopalospongia gregaria (Benett, 1831)	Figured	Warminster, Wiltshire, England, United Kingdom	Cretaceous, Upper Greensand	History unrecorded		Hinde, G.J. 1884. Catalogue of the Fossil Sponges in the Geological Department of the British Museum (Natural History). With descriptions of new and little-known species. BM(NH), London, 248 pp. (on pl.22, figs. 2a, 2c)
479	NHMUK PI P 1505 (9)	1	hand specimen				Rhopalospongia gregaria (Benett, 1831)		Warminster, Wiltshire, England, United Kingdom	Cretaceous, Upper Greensand	History unrecorded
480	NHMUK PI P 1505 (10)	2	hand specimen				Rhopalospongia gregaria (Benett, 1831)		Warminster, Wiltshire, England, United Kingdom	Cretaceous, Upper Greensand	History unrecorded
481	NHMUK PI P 1505 (11)	1	hand specimen				Rhopalospongia gregaria (Benett, 1831)	Figured	Warminster, Wiltshire, England, United Kingdom	Cretaceous, Upper Greensand	History unrecorded		Hinde, G.J. 1884. Catalogue of the Fossil Sponges in the Geological Department of the British Museum (Natural History). With descriptions of new and little-known species. BM(NH), London, 248 pp. (on pl.22, fig. 2)
482	NHMUK PI P 1522	3	hand specimen				Ragadinia Zittel, 1878		Beckhampton, Wiltshire, England, United Kingdom	Cretaceous, Chalk Group, Upper Chalk	History unrecorded
483	NHMUK PI P 1525 (1)	1	hand specimen				Ragadinia Zittel, 1878		England, United Kingdom	Cretaceous, Chalk Group, Upper Chalk	BRIGHT Collection
484	NHMUK PI P 1524	1	hand specimen				Ragadinia Zittel, 1878		England, United Kingdom	Cretaceous, Chalk Group, Upper Chalk	BRIGHT Collection
485	NHMUK PI P 1526	1	hand specimen				Ragadinia Zittel, 1878		England, United Kingdom	Cretaceous, Chalk Group, Upper Chalk	BRIGHT Collection
486	NHMUK PI P 1394	0	hand specimen				Ragadinia Zittel, 1878		Dover, Kent, England, United Kingdom	Cretaceous, Chalk Group, Lower Chalk	BURNETT, Mrs., May 1882	Presented
487	NHMUK PI P 1520 (1)	1	hand specimen		P 1519	BM(NH) number	Ragadinia sulcata Hinde, 1884	Figured	Beckhampton, Wiltshire, England, United Kingdom	Cretaceous, Chalk Group, Upper Chalk	CUNNINGTON Collection	Purchased	Hinde, G.J. 1884. Catalogue of the Fossil Sponges in the Geological Department of the British Museum (Natural History). With descriptions of new and little-known species. BM(NH), London, 248 pp. (on pl.20, fig. 1)
488	NHMUK PI P 1521	2	hand specimen				Ragadinia sulcata Hinde, 1884	Figured	Wiltshire, England, United Kingdom	Cretaceous, Chalk Group, Upper Chalk	History unrecorded		Hinde, G.J. 1884. Catalogue of the Fossil Sponges in the Geological Department of the British Museum (Natural History). With descriptions of new and little-known species. BM(NH), London, 248 pp. (on pl.20, fig. 1a)
489	NHMUK PI P 1520 (2)	3	hand specimen		55126	BM(NH) number	Ragadinia sulcata Hinde, 1884		Beckhampton, Wiltshire, England, United Kingdom	Cretaceous, Chalk Group, Upper Chalk	CUNNINGTON Collection	Purchased
490	NHMUK PI P 1527 (1)	1	hand specimen				Ragadinia compressa Hinde, 1884	Figured	Huish, Wiltshire, England, United Kingdom	Cretaceous, Chalk Group, Upper Chalk	CUNNINGTON Collection	Purchased	Hinde, G.J. 1884. Catalogue of the Fossil Sponges in the Geological Department of the British Museum (Natural History). With descriptions of new and little-known species. BM(NH), London, 248 pp. (on pl.19, fig. 3)
491	NHMUK PI P 1527 (2)	2	hand specimen				Ragadinia compressa Hinde, 1884		Oare, Wiltshire, England, United Kingdom	Cretaceous, Chalk Group, Upper Chalk	History unrecorded
492	NHMUK PI P 1528	1	hand specimen				Ragadinia compressa Hinde, 1884		Gare Hill, Wiltshire, England	Cretaceous, Chalk Group, Upper Chalk	BRIGHT Collection
493	NHMUK PI P 1529	1	hand specimen				Ragadinia compressa Hinde, 1884		Gare Hill, Wiltshire, England	Cretaceous, Chalk Group, Upper Chalk	BRIGHT Collection
494	NHMUK PI S 7951 $1	1	thin section				Prokaliapsis clavata (Hinde, 1884)		West Cliffs, Dorset, Kent, England, United Kingdom	Cretaceous, Chalk Group	ROWE, Arthur Walter, Nov 1926	Purchased
495	NHMUK PI P 1516 (1)	9	hand specimen				Prokaliapsis clavata (Hinde, 1884)		Wiltshire, England, United Kingdom	Cretaceous, Chalk Group, Upper Chalk	History unrecorded
496	NHMUK PI P 1517 (1)	8	hand specimen				Prokaliapsis clavata (Hinde, 1884)		Wiltshire, England, United Kingdom	Cretaceous, Chalk Group, Upper Chalk	MANTELL, Gideon Algernon, 1839	Purchased
497	NHMUK PI S 7828	2	hand specimen				Prokaliapsis clavata (Hinde, 1884)		West Cliffs, Dorset, Kent, England, United Kingdom	Cretaceous, Chalk Group, Lower Chalk	ROWE, Arthur Walter, Nov 1926	Purchased
498	NHMUK PI S 7829	1	hand specimen				Prokaliapsis clavata (Hinde, 1884)		West Cliffs, Dorset, Kent, England, United Kingdom	Cretaceous, Chalk Group, Lower Chalk	ROWE, Arthur Walter, Nov 1926	Purchased
499	NHMUK PI P 1523	1	hand specimen				Prokaliapsis clavata (Hinde, 1884)		Wiltshire, England, United Kingdom	Cretaceous, Chalk Group, Upper Chalk	MANTELL, Gideon Algernon, 1839	Purchased
500	NHMUK PI P 1517 (2)	2	hand specimen				Prokaliapsis clavata (Hinde, 1884)		Stockton, Wiltshire, England, United Kindgom	Cretaceous, Chalk Group, Upper Chalk	MANTELL, Gideon Algernon, 1839	Purchased
501	NHMUK PI P 1516 (2)	1	hand specimen				Prokaliapsis clavata (Hinde, 1884)	Figured	Wiltshire, England, United Kingdom	Cretaceous, Chalk Group, Upper Chalk	History unrecorded		Hinde, G.J. 1884. Catalogue of the Fossil Sponges in the Geological Department of the British Museum (Natural History). With descriptions of new and little-known species. BM(NH), London, 248 pp. (on pl.19, fig. 4a)
502	NHMUK PI P 3513	1	hand specimen				Thamnospongia clavellata (Benett, 1831)		Milber, Devon, England, United Kingdom	Cretacous, Chalk Group	LEE, John Edward Collection, October 1885	Presented
503	NHMUK PI P 1481	1	hand specimen				Thamnospongia clavellata (Benett, 1831)		Chicklade, Wiltshire, England, United Kingdom	Cretaceous, Chalk Group, Upper Chalk	SMITH, Joshua Toulmin, 1869	Purchased
504	NHMUK PI P 1482	1	hand specimen				Thamnospongia clavellata (Benett, 1831)		Chicklade, Wiltshire, England, United Kingdom	Cretaceous, Chalk Group, Upper Chalk	DIXON Collection
505	NHMUK PI P 1476 (1)	1	hand specimen				Thamnospongia clavellata (Benett, 1831)		Portwood, Warminster, Wiltshire, England, United Kingdom	Cretaceous, Chalk Group, Upper Chalk	History unrecorded
506	NHMUK PI P 1483	2	hand specimen				Thamnospongia clavellata (Benett, 1831)		Beckhampton, Wiltshire, England, United Kingdom	Cretaceous, Chalk Group, Upper Chalk	CUNNINGTON Collection	Purchased
507	NHMUK PI P 1484	6	hand specimen				Thamnospongia clavellata (Benett, 1831)		Wiltshire, England, United Kingdom	Cretaceous, Chalk Group, Upper Chalk	LUDLAM, Henry, July 1871	Presented
508	NHMUK PI S 9880	1	hand specimen				Thamnospongia clavellata (Benett, 1831)		South of England	Cretaceous, Chalk Group, Upper Chalk	History unrecorded
509	NHMUK PI P 1480	2	hand specimen				Thamnospongia clavellata (Benett, 1831)		Dover, Kent, England, United Kingdom	Cretaceous, Chalk Group, Upper Chalk	DANIELS Collection
510	NHMUK PI P 3541	5	hand specimen				Thamnospongia clavellata (Benett, 1831)		Warminster, Wiltshire, England, United Kingdom	Cretaceous, Chalk Group, Upper Chalk	LEE, John Edward Collection, October 1885	Presented
511	NHMUK PI P 1477 (1)	3	hand specimen				Thamnospongia clavellata (Benett, 1831)		Stockton, Wiltshire, England, United Kindgom	Cretaceous, Chalk Group, Upper Chalk	History unrecorded
512	NHMUK PI P 1485 (1)	7	hand specimen				Thamnospongia glabra Hinde, 1884		Beckhampton, Wiltshire, England, United Kingdom	Cretaceous, Chalk Group, Upper Chalk	History unrecorded
513	NHMUK PI P 1479	2	hand specimen				Thamnospongia clavellata (Benett, 1831)		Wiltshire, England, United Kingdom	Cretaceous, Chalk Group, Upper Chalk	BROWN, J.	Presented
514	NHMUK PI P 1477 (2)	2	hand specimen				Thamnospongia clavellata (Benett, 1831)		Warminster, Wiltshire, England, United Kingdom	Cretaceous, Chalk Group, Upper Chalk	CAPRON Collection	Purchased
515	NHMUK PI P 1476 (2)	6	hand specimen				Thamnospongia clavellata (Benett, 1831)		Wiltshire, England, United Kingdom	Cretaceous, Chalk Group, Upper Chalk	MANTELL, Gideon Algernon, 1839	Purchased
516	NHMUK PI P 1476 (3)	2	hand specimen				Thamnospongia clavellata (Benett, 1831)		Wiltshire, England, United Kingdom	Cretaceous, Chalk Group, Upper Chalk	MANTELL, Gideon Algernon, 1839	Purchased
517	NHMUK PI P 1475 (1)	2	hand specimen				Thamnospongia clavellata (Benett, 1831)		Stockton, Wiltshire, England, United Kindgom	Cretaceous, Chalk Group, Upper Chalk	History unrecorded
518	NHMUK PI P 1475 (2)	1	hand specimen				Thamnospongia clavellata (Benett, 1831)		Stockton, Wiltshire, England, United Kindgom	Cretaceous, Chalk Group, Upper Chalk	History unrecorded
519	NHMUK PI P 1475 (3)	4	hand specimen				Thamnospongia clavellata (Benett, 1831)		Stockton, Wiltshire, England, United Kindgom	Cretaceous, Chalk Group, Upper Chalk	History unrecorded
520	NHMUK PI P 1475 (4)	11	hand specimen				Thamnospongia clavellata (Benett, 1831)		Stockton, Wiltshire, England, United Kindgom	Cretaceous, Chalk Group, Upper Chalk	History unrecorded
521	NHMUK PI P 1475 (5)	2	hand specimen				Thamnospongia clavellata (Benett, 1831)		Stockton, Wiltshire, England, United Kindgom	Cretaceous, Chalk Group, Upper Chalk	History unrecorded
522	NHMUK PI P 1475 (6)	1	hand specimen				Thamnospongia clavellata (Benett, 1831)		Stockton, Wiltshire, England, United Kindgom	Cretaceous, Chalk Group, Upper Chalk	History unrecorded
523	NHMUK PI P 1475 (7)	1	hand specimen				Thamnospongia clavellata (Benett, 1831)		Stockton, Wiltshire, England, United Kindgom	Cretaceous, Chalk Group, Upper Chalk	History unrecorded
524	NHMUK PI P 1475 (8)	1	hand specimen				Thamnospongia clavellata (Benett, 1831)		Stockton, Wiltshire, England, United Kindgom	Cretaceous, Chalk Group, Upper Chalk	History unrecorded
525	NHMUK PI P 1475 (9)	1	hand specimen				Thamnospongia clavellata (Benett, 1831)	Figured	Stockton, Wiltshire, England, United Kindgom	Cretaceous, Chalk Group, Upper Chalk	History unrecorded		Hinde, G.J. 1884. Catalogue of the Fossil Sponges in the Geological Department of the British Museum (Natural History). With descriptions of new and little-known species. BM(NH), London, 248 pp. (on pl.18, fig. 2b)
526	NHMUK PI P 1478 (1)	1	hand specimen				Thamnospongia clavellata (Benett, 1831)	Figured	Chicklade, Wiltshire, England, United Kingdom	Cretaceous, Chalk Group, Upper Chalk	History unrecorded		Hinde, G.J. 1884. Catalogue of the Fossil Sponges in the Geological Department of the British Museum (Natural History). With descriptions of new and little-known species. BM(NH), London, 248 pp. (on pl.18, fig. 2a)
527	NHMUK PI P 1478 (2)	1	hand specimen				Thamnospongia clavellata (Benett, 1831)	Figured	Chicklade, Wiltshire, England, United Kingdom	Cretaceous, Chalk Group, Upper Chalk	History unrecorded		Hinde, G.J. 1884. Catalogue of the Fossil Sponges in the Geological Department of the British Museum (Natural History). With descriptions of new and little-known species. BM(NH), London, 248 pp. (on pl.18, fig. 2)
528	NHMUK PI D 2311	1	hand specimen				?Thamnospongia Hinde, 1884		England, United Kingdom	Cretaceous, Chalk Group	FLOTT?, Mrs., 23 Sep 1896	Purchased
529	NHMUK PI P 1472	3	hand specimen				Thamnospongia reticulata Hinde, 1884	Figured	Near Folkestone, Kent, England, United Kingdom	Cretaceous, Cenomanian	History unrecorded		Hinde, G.J. 1884. Catalogue of the Fossil Sponges in the Geological Department of the British Museum (Natural History). With descriptions of new and little-known species. BM(NH), London, 248 pp. (on pl.18, figs. 3, 3a, 3b)
530	NHMUK PI P 1485 (2)	4	hand specimen				Thamnospongia glabra Hinde, 1884		Beckhampton, Wiltshire, England, United Kingdom	Cretaceous, Chalk Group, Upper Chalk	History unrecorded
531	NHMUK PI P 1488	2	hand specimen				Thamnospongia glabra Hinde, 1884		Woodford, Wiltshire, England, United Kingdom	Cretaceous, Chalk Group, Upper Chalk	History unrecorded
532	NHMUK PI S 10005	1	hand specimen		14775	BM(NH) number	Thamnospongia glabra Hinde, 1884		Woodford, Wiltshire, England, United Kingdom	Cretaceous, Chalk Group, Upper Chalk	WRIGHT, Claud William & WRIGHT, E. V., Jun 1948	Donated
533	NHMUK PI P 1486	4	hand specimen				Thamnospongia glabra Hinde, 1884		Wiltshire, England, United Kingdom	Cretaceous, Chalk Group, Upper Chalk	CUNNINGTON Collection	Purchased
534	NHMUK PI P 1487	4	hand specimen				Thamnospongia glabra Hinde, 1884		Wiltshire, England, United Kingdom	Cretaceous, Chalk Group, Upper Chalk	History unrecorded
535	NHMUK PI P 1780	2	hand specimen				Thamnospongia glabra Hinde, 1884	Figured	Budleigh Salterton, Devon, England, United Kingdom	Cretaceous, Chalk Group, Upper Chalk	CARTER, Henry John, 1883	Donated	Hinde, G.J. 1884. Catalogue of the Fossil Sponges in the Geological Department of the British Museum (Natural History). With descriptions of new and little-known species. BM(NH), London, 248 pp. (on pl.17, fig. 5c)
536	NHMUK PI P 1485 (3)	2	hand specimen				Thamnospongia glabra Hinde, 1884	Figured	Beckhampton, Wiltshire, England, United Kingdom	Cretaceous, Chalk Group, Upper Chalk	History unrecorded		Hinde, G.J. 1884. Catalogue of the Fossil Sponges in the Geological Department of the British Museum (Natural History). With descriptions of new and little-known species. BM(NH), London, 248 pp. (on pl.17, fig. 5, 5b)
537	NHMUK PI S 7905	1	hand specimen				Pholidocladia ramosus Hinde, 1884		Kingsgate Castle, Kent, England, United Kingdom	Cretaceous, Chalk Group, Upper Chalk	ROWE, Arthur Walter, Nov 1926	Purchased
538	NHMUK PI S 7931	1	hand specimen				Pholidocladia ramosus Hinde, 1884		Chatham, Kent, England, United Kingdom	Cretaceous, Chalk Group, Upper Chalk	ROWE, Arthur Walter, Nov 1926	Purchased
539	NHMUK PI S 7906	1	hand specimen				Pholidocladia ramosus Hinde, 1884		South of England	Cretaceous, Chalk Group, Upper Chalk	ROWE, Arthur Walter, Nov 1926	Purchased
540	NHMUK PI S 7907	1	hand specimen				Pholidocladia ramosus Hinde, 1884		South of England	Cretaceous, Chalk Group, Upper Chalk	ROWE, Arthur Walter, Nov 1926	Purchased
541	NHMUK PI S 7908	1	hand specimen				Pholidocladia ramosus Hinde, 1884		South of England	Cretaceous, Chalk Group, Upper Chalk	ROWE, Arthur Walter, Nov 1926	Purchased
542	NHMUK PI S 7909	1	hand specimen				Pholidocladia ramosus Hinde, 1884		South of England	Cretaceous, Chalk Group, Upper Chalk	ROWE, Arthur Walter, Nov 1926	Purchased
543	NHMUK PI S 10502	1	hand specimen				Pholidocladia ramosus Hinde, 1884		South of England	Cretaceous, Chalk Group, Upper Chalk	ROWE, Arthur Walter, Nov 1926	Purchased
544	NHMUK PI S 7911	4	hand specimen				Pholidocladia ramosus Hinde, 1884		Kingsgate Castle, Kent, England, United Kingdom	Cretaceous, Chalk Group, Upper Chalk	ROWE, Arthur Walter, Nov 1926	Purchased
545	NHMUK PI S 7912	1	hand specimen				Pholidocladia ramosus Hinde, 1884		Kingsgate Castle, Kent, England, United Kingdom	Cretaceous, Chalk Group, Upper Chalk	ROWE, Arthur Walter, Nov 1926	Purchased
546	NHMUK PI S 7788	1	hand specimen				Pholidocladia ramosus Hinde, 1884		Undercliffe, Bonchurch Cove, Isle of Wight, England, United Kingdom	Cretaceous, Chalk Group, Upper Chalk	ROWE, Arthur Walter, Nov 1926	Purchased
547	NHMUK PI S 7932	2	hand specimen				Pholidocladia ramosus Hinde, 1884		Gillingham, Kent, England, United Kingdom	Cretaceous, Chalk Group, Upper Chalk	ROWE, Arthur Walter, Nov 1926	Purchased
548	NHMUK PI S 7786	1	hand specimen				Pholidocladia ramosus Hinde, 1884		Undercliffe, Bonchurch Cove, Isle of Wight, England, United Kingdom	Cretaceous, Chalk Group, Upper Chalk	ROWE, Arthur Walter, Nov 1926	Purchased
549	NHMUK PI S 7787	1	hand specimen				Pholidocladia ramosus Hinde, 1884		Undercliffe, Bonchurch Cove, Isle of Wight, England, United Kingdom	Cretaceous, Chalk Group, Upper Chalk	ROWE, Arthur Walter, Nov 1926	Purchased
550	NHMUK PI S 10503	1	hand specimen				Pholidocladia ramosus Hinde, 1884		Kingsgate Castle, Kent, England, United Kingdom	Cretaceous, Chalk Group, Upper Chalk	ROWE, Arthur Walter, Nov 1926	Purchased
551	NHMUK PI P 1473 (1)	1	hand specimen				Pholidocladia ramosus Hinde, 1884		South of England	Cretaceous, Chalk Group, Upper Chalk	History unrecorded
552	NHMUK PI P 1473 (2)	1	hand specimen				Pholidocladia ramosus Hinde, 1884		South of England	Cretaceous, Chalk Group, Upper Chalk	History unrecorded
553	NHMUK PI P 4152	1	hand specimen				Pholidocladia ramosus Hinde, 1884		South of England	Cretaceous, Chalk Group, Upper Chalk	HARFORD, Fredrik, Jun 1888	Purchased
554	NHMUK PI S 5175	1	hand specimen				Pholidocladia ramosus Hinde, 1884		South of England	Cretaceous, Chalk Group, Upper Chalk	History unrecorded
555	NHMUK PI P 1474	2	hand specimen				Pholidocladia ramosus Hinde, 1884		South of England	Cretaceous, Chalk Group, Upper Chalk	BOWERBANK, James Scott, 1865	Purchased
556	NHMUK PI P 7444	1	hand specimen				Pholidocladia ramosus Hinde, 1884		East Dean, Sussex, England, United Kingdom	Cretaceous, Chalk Group, Upper Chalk	METCALFE, H. F., May 1953	Donated
557	NHMUK PI S 6641 (1)	2	hand specimen				Pholidocladia ramosus Hinde, 1884		West Stow, Norfolk, England, United Kingdom	Cretaceous, Chalk Group, Upper Chalk	OAKLEY, Dr. K. P., Dec 1950	Donated
558	NHMUK PI P 1473 (3)	1	hand specimen				Pholidocladia ramosus Hinde, 1884	Figured	South of England	Cretaceous, Chalk Group, Upper Chalk	History unrecorded		Hinde, G.J. 1884. Catalogue of the Fossil Sponges in the Geological Department of the British Museum (Natural History). With descriptions of new and little-known species. BM(NH), London, 248 pp. (on pl.18, fig. 5)
559	NHMUK PI P 1473 (4)	6	hand specimen				Pholidocladia ramosus Hinde, 1884		South of England	Cretaceous, Chalk Group, Upper Chalk	History unrecorded
560	NHMUK PI P 1473 (5)	3	hand specimen				Pholidocladia ramosus Hinde, 1884		South of England	Cretaceous, Chalk Group, Upper Chalk	History unrecorded
561	NHMUK PI P 1503	1	hand specimen				Calymmatina rimosa Zittel, 1878		Heytesbury, Wiltshire, England, United Kingdom	Cretaceous, Chalk Group, Upper Chalk	MANTELL, Gideon Algernon, 1839	Purchased
562	NHMUK PI P 1501	1	hand specimen				Turonia variabilis Michelin, 1847		Flamborough, Yorkshire, England, United Kingdom	Cretaceous, Chalk Group, Upper Chalk	History unrecorded
563	NHMUK PI P 1500	2	hand specimen				Turonia variabilis Michelin, 1847		South of England	Cretaceous, Chalk Group, Upper Chalk	SMITH, Joshua Toulmin, 1869	Purchased
564	NHMUK PI P 1451 (1)	2	hand specimen				Jerea reticulata Hinde, 1984	Figured	Warminster, Wiltshire, England, United Kingdom	Cretaceous, Upper Greensand	History unrecorded		Hinde, G.J. 1884. Catalogue of the Fossil Sponges in the Geological Department of the British Museum (Natural History). With descriptions of new and little-known species. BM(NH), London, 248 pp. (on pl.15, fig. 2b)
565	NHMUK PI S 8192	1	hand specimen				Jerea reticulata Hinde, 1984		St. Lawrence, Isle of Wight, England United Kingdom	Cretaceous, Upper Greensand	History unrecorded
566	NHMUK PI S 8193	1	hand specimen				Jerea reticulata Hinde, 1984		St. Lawrence, Isle of Wight, England United Kingdom	Cretaceous, Upper Greensand	History unrecorded
567	NHMUK PI S 8194	1	hand specimen				Jerea reticulata Hinde, 1984		St. Lawrence, Isle of Wight, England United Kingdom	Cretaceous, Upper Greensand	History unrecorded
568	NHMUK PI S 8195	1	hand specimen				Jerea reticulata Hinde, 1984		St. Lawrence, Isle of Wight, England United Kingdom	Cretaceous, Upper Greensand	History unrecorded
569	NHMUK PI S 8215	1	hand specimen				Jerea reticulata Hinde, 1984		St. Lawrence, Isle of Wight, England United Kingdom	Cretaceous, Upper Greensand	FORD, R. L. E., Nov 1959	Presented
570	NHMUK PI S 8216	1	hand specimen				Jerea reticulata Hinde, 1984		St. Lawrence, Isle of Wight, England United Kingdom	Cretaceous, Upper Greensand	FORD, R. L. E., Nov 1959	Presented
571	NHMUK PI S 8217	1	hand specimen				Jerea reticulata Hinde, 1984		St. Lawrence, Isle of Wight, England United Kingdom	Cretaceous, Upper Greensand	FORD, R. L. E., Nov 1959	Presented
572	NHMUK PI S 8218	1	hand specimen				Jerea reticulata Hinde, 1984		St. Lawrence, Isle of Wight, England United Kingdom	Cretaceous, Upper Greensand	FORD, R. L. E., Nov 1959	Presented
573	NHMUK PI P 21	9	hand specimen				Jerea reticulata Hinde, 1984		Folkestone, Kent, England, United Kingdom	Cretaceous, Gault	GARDNER, J. S., Jun 1881	Purchased
574	NHMUK PI S 7832	2	hand specimen				Jerea reticulata Hinde, 1984		Folkestone, Kent, England, United Kingdom	Cretaceous, Gault	ROWE, Arthur Walter, Nov 1926	Purchased
575	NHMUK PI S 7833	1	hand specimen				Jerea reticulata Hinde, 1984		Folkestone, Kent, England, United Kingdom	Cretaceous, Gault	ROWE, Arthur Walter, Nov 1926	Purchased
576	NHMUK PI S 7834	1	hand specimen				Jerea reticulata Hinde, 1984		Folkestone, Kent, England, United Kingdom	Cretaceous, Gault	ROWE, Arthur Walter, Nov 1926	Purchased
577	NHMUK PI S 7835	1	hand specimen				Jerea reticulata Hinde, 1984		Folkestone, Kent, England, United Kingdom	Cretaceous, Gault	ROWE, Arthur Walter, Nov 1926	Purchased
578	NHMUK PI P 3233	6	hand specimen				Jerea reticulata Hinde, 1984		Dover, Kent, England, United Kingdom	Cretaceous, Gault	History unrecorded
579	NHMUK PI P 3222	1	hand specimen				Jerea websteri Sowerby in Hinde, 1884		Folkestone, Kent, England, United Kingdom	Cretaceous, Gault	History unrecorded
580	NHMUK PI P 1448 (1)	4	hand specimen				Jerea websteri Sowerby in Hinde, 1884		Kent, England, United Kingdom	Cretaceous, Gault	History unrecorded
581	NHMUK PI P 3642	1	hand specimen				Jerea reticulata Hinde, 1984		St. Catherine's Down, Isle of Wight, England, United Kingdom	Cretaceous, Upper Greensand	GARDNER, J. S., Jun 1881	Purchased
582	NHMUK PI S 9730	1	hand specimen				Jerea reticulata Hinde, 1984		Manor Farm, Treyford, Sussex, England, United Kingdom	Cretaceous, Cenomanian	GASTER, Christopher Theodore Augustine, Collection	Presented
583	NHMUK PI P 1453	1	hand specimen				Jerea reticulata Hinde, 1984		Dover, Kent, England, United Kingdom	Cretaceous, Gault	History unrecorded
584	NHMUK PI P 1354	5	hand specimen				Jerea reticulata Hinde, 1984		Isle of Wight, England, United Kingdom	Cretaceous, Lower Chalk, Chalk Marl	History unrecorded
585	NHMUK PI P 1451 (2)	6	hand specimen				Jerea reticulata Hinde, 1984		Warminster, Wiltshire, England, United Kingdom	Cretaceous, Upper Greensand	BROWN, J.	Presented
586	NHMUK PI P 2246	1	hand specimen				Jerea websteri Sowerby in Hinde, 1884		Warminster, Wiltshire, England, United Kingdom	Cretaceous, Upper Greensand	GARDNER, J. S., 1884	Purchased
587	NHMUK PI S 5675	1	hand specimen				Jerea websteri Sowerby in Hinde, 1884		Durdle Cove, Dorset, England, United Kingdom	Cretaceous, Albian	WRIGHT, Claud William & WRIGHT, E. V., Jun 1948	Donated
588	NHMUK PI S 9108	1	hand specimen				Jerea websteri Sowerby in Hinde, 1884		Isle of Wight, England, United Kingdom	Cretaceous, Lower Chalk, Chalk Marl	HINDE, Dr. George Jennings, 1918	Presented
589	NHMUK PI S 9109	1	hand specimen				Jerea websteri Sowerby in Hinde, 1884		Isle of Wight, England, United Kingdom	Cretaceous, Lower Chalk, Chalk Marl	HINDE, Dr. George Jennings, 1918	Presented
590	NHMUK PI P 2293 (1)	1	hand specimen				Jerea websteri Sowerby in Hinde, 1884		Warminster, Wiltshire, England, United Kingdom	Cretaceous, Upper Greensand	History unrecorded
591	NHMUK PI P 2283	1	hand specimen				Jerea websteri Sowerby in Hinde, 1884		Warminster, Wiltshire, England, United Kingdom	Cretaceous, Upper Greensand	History unrecorded
592	NHMUK PI S 8187	1	hand specimen				Jerea websteri Sowerby in Hinde, 1884		Warminster, Wiltshire, England, United Kingdom	Cretaceous, Upper Greensand	Dorset County Museum, July 1959	Donated
593	NHMUK PI P 3534	1	hand specimen				Jerea websteri Sowerby in Hinde, 1884		Ventnor, Isle of Wight, England, United Kingdom	Cretaceous, Lower Chalk, Chalk Marl	LEE, John Edward Collection, October 1885	Presented
594	NHMUK PI S 7381	1	hand specimen				Jerea websteri Sowerby in Hinde, 1884		Folkestone, Kent, England, United Kingdom	Cretaceous, Gault	ROWE, Arthur Walter, Nov 1926	Purchased
595	NHMUK PI P 1450 (1)	2	hand specimen				Jerea websteri Sowerby in Hinde, 1884		Warminster, Wiltshire, England, United Kingdom	Cretaceous, Upper Greensand	History unrecorded
596	NHMUK PI P 1448 (2)	5	hand specimen				Jerea websteri Sowerby in Hinde, 1884		Warminster, Wiltshire, England, United Kingdom	Cretaceous, Upper Greensand	History unrecorded
597	NHMUK PI S 8210	1	hand specimen				Jerea websteri Sowerby in Hinde, 1884		St. Lawrence, Isle of Wight, England United Kingdom	Cretaceous, Upper Greensand	FORD, R. L. E., Nov 1959	Presented
598	NHMUK PI S 8211	1	hand specimen				Jerea websteri Sowerby in Hinde, 1884		St. Lawrence, Isle of Wight, England United Kingdom	Cretaceous, Upper Greensand	FORD, R. L. E., Nov 1959	Presented
599	NHMUK PI S 8212	1	hand specimen				Jerea websteri Sowerby in Hinde, 1884		St. Lawrence, Isle of Wight, England United Kingdom	Cretaceous, Upper Greensand	FORD, R. L. E., Nov 1959	Presented
600	NHMUK PI S 8213	1	hand specimen				Jerea websteri Sowerby in Hinde, 1884		St. Lawrence, Isle of Wight, England United Kingdom	Cretaceous, Upper Greensand	FORD, R. L. E., Nov 1959	Presented
601	NHMUK PI S 8214	1	hand specimen				Jerea websteri Sowerby in Hinde, 1884		St. Lawrence, Isle of Wight, England United Kingdom	Cretaceous, Upper Greensand	FORD, R. L. E., Nov 1959	Presented
602	NHMUK PI P 3533	2	hand specimen				Jerea websteri Sowerby in Hinde, 1884		Ventnor, Isle of Wight, England, United Kingdom	Cretaceous, Lower Chalk, Chalk Marl	LEE, John Edward Collection, October 1885	Presented
603	NHMUK PI P 1447 $1	1	thin section				Jerea websteri Sowerby in Hinde, 1884		Warminster, Wiltshire, England, United Kingdom	Cretaceous, Upper Greensand	History unrecorded
604	NHMUK PI P 1450 (2)	6	hand specimen				Jerea websteri Sowerby in Hinde, 1884		Warminster, Wiltshire, England, United Kingdom	Cretaceous, Upper Greensand	History unrecorded
605	NHMUK PI S 7772	2	hand specimen				Jerea websteri Sowerby in Hinde, 1884		Highport, Ventnor, Isle of Wight, England, United Kingdom	Cretaceous, Lower Chalk, Chalk Marl	ROWE, Arthur Walter, Nov 1926	Purchased
606	NHMUK PI S 9650	1	hand specimen				Jerea websteri Sowerby in Hinde, 1884		Dover, Kent, England, United Kingdom	Cretaceous, Cenomanian	ROWE, Arthur Walter, Nov 1926	Purchased
607	NHMUK PI S 4544	2	hand specimen				Jerea websteri Sowerby in Hinde, 1884	Figured	Folkestone, Kent, England, United Kingdom	Cretaceous, Chalk Group, Grey Chalk	SHARPE, J. Collection		Oakley, K.P. 1937. Cretaceous sponges: some biological and geological considerations. Proceedings of the Geologists' Association, 48: 330-348. (on pl. 32, fig. 1)
608	NHMUK PI S 4544 $1	1	thin section				Jerea websteri Sowerby in Hinde, 1884	Figured	Folkestone, Kent, England, United Kingdom	Cretaceous, Chalk Group, Grey Chalk	SHARPE, J. Collection		Oakley, K.P. 1937. Cretaceous sponges: some biological and geological considerations. Proceedings of the Geologists' Association, 48: 330-348. (on pl. 32, fig. 1)
609	NHMUK PI S 3232	1	hand specimen				Jerea websteri Sowerby in Hinde, 1884		Folkestone, Kent, England, United Kingdom	Cretaceous, Gault	History unrecorded
610	NHMUK PI S 8219	1	hand specimen				Jerea websteri Sowerby in Hinde, 1884		St. Lawrence, Isle of Wight, England United Kingdom	Cretaceous, Upper Greensand	FORD, R. L. E., Nov 1959	Presented
611	NHMUK PI S 8220	1	hand specimen				Jerea websteri Sowerby in Hinde, 1884		St. Lawrence, Isle of Wight, England United Kingdom	Cretaceous, Upper Greensand	FORD, R. L. E., Nov 1959	Presented
612	NHMUK PI S 8221	1	hand specimen				Jerea websteri Sowerby in Hinde, 1884		St. Lawrence, Isle of Wight, England United Kingdom	Cretaceous, Upper Greensand	FORD, R. L. E., Nov 1959	Presented
613	NHMUK PI S 8222	1	hand specimen				Jerea websteri Sowerby in Hinde, 1884		St. Lawrence, Isle of Wight, England United Kingdom	Cretaceous, Upper Greensand	FORD, R. L. E., Nov 1959	Presented
614	NHMUK PI S 8223	1	hand specimen				Jerea websteri Sowerby in Hinde, 1884		St. Lawrence, Isle of Wight, England United Kingdom	Cretaceous, Upper Greensand	FORD, R. L. E., Nov 1959	Presented
615	NHMUK PI S 5779	1	hand specimen				Jerea websteri Sowerby in Hinde, 1884		Ventnor, Isle of Wight, England, United Kingdom	Cretaceous, Upper Greensand	History unrecorded
616	NHMUK PI S 8509	1	hand specimen				Jerea websteri Sowerby in Hinde, 1884		Ventnor, Isle of Wight, England, United Kingdom	Cretaceous, Upper Greensand	BIRLEY, Caroline, 1907	Bequest
617	NHMUK PI S 8510 (1)	1	hand specimen				Jerea websteri Sowerby in Hinde, 1884		Ventnor, Isle of Wight, England, United Kingdom	Cretaceous, Upper Greensand	BIRLEY, Caroline, 1907	Bequest
618	NHMUK PI S 8511	1	hand specimen				Jerea websteri Sowerby in Hinde, 1884		Ventnor, Isle of Wight, England, United Kingdom	Cretaceous, Upper Greensand	BIRLEY, Caroline, 1907	Bequest
619	NHMUK PI P 1448 (3)	3	hand specimen				Jerea websteri Sowerby in Hinde, 1884		Warminster, Wiltshire, England, United Kingdom	Cretaceous, Upper Greensand	History unrecorded
620	NHMUK PI P 3930	3	hand specimen				Jerea websteri Sowerby in Hinde, 1884		Dover, Kent, England, United Kingdom	Cretaceous, Gault	GARDNER, J. S., 1886	Purchased
621	NHMUK PI P 3262	1	hand specimen				Jerea websteri Sowerby in Hinde, 1884		Sevenoaks, Kent, England, United Kingdom	Cretaceous, Lower Greensand	History unrecorded
622	NHMUK PI P 4412	2	hand specimen				Jerea websteri Sowerby in Hinde, 1884		Ventnor, Isle of Wight, England, United Kingdom	Cretaceous, Upper Greensand	History unrecorded
623	NHMUK PI S 4545	1	hand specimen				Jerea Lamouroux, 1821	Figured	Warminster, Wiltshire, England, United Kingdom	Cretaceous, Upper Greensand	History unrecorded		Oakley, K.P. 1937. Cretaceous sponges: some biological and geological considerations. Proceedings of the Geologists' Association, 48: 330-348. (on pl. 32, fig. 2)
624	NHMUK PI P 1457	1	hand specimen				Jerea excavata Michelin, 1847		Wiltshire, England, United Kingdom	Cretaceous, Chalk Group, Upper Chalk	History unrecorded
625	NHMUK PI P 1458	2	hand specimen				Jerea cordiformis Hinde, 1884	Holotype	Dover, Kent, England, United Kingdom	Cretaceous, Cenomanian	History unrecorded		Hinde, G.J. 1884. Catalogue of the Fossil Sponges in the Geological Department of the British Museum (Natural History). With descriptions of new and little-known species. BM(NH), London, 248 pp. (on pl.15, figs. 3, 3a)
626	NHMUK PI S 7876	1	hand specimen				Siphonia ficus Goldfuss, 1833		Dover, Kent, England, United Kingdom	Cretaceous, Lower Chalk, Chalk Marl	ROWE, Arthur Walter, Nov 1926	Purchased
627	NHMUK PI S 9643	1	hand specimen				Jerea Lamouroux, 1821		Dover, Kent, England, United Kingdom	Cretaceous, Cenomanian	ROWE, Arthur Walter, Nov 1926	Purchased
628	NHMUK PI S 371	1	hand specimen				Lithistida Schmidt, 1870		Sandown Bay, Isle of Wight, England, United Kingdom	Cretaceous, Cenomanian	JONES, G., 17 Jul 1911	Presented
629	NHMUK PI S 7819	4	hand specimen				Siphonia ficus Goldfuss, 1833		Dover, Kent, England, United Kingdom	Cretaceous, Lower Chalk, Chalk Marl	ROWE, Arthur Walter, Nov 1926	Purchased
630	NHMUK PI P 1403	2	hand specimen				Siphonia ficus Goldfuss, 1833		Rocken End, Isle of Wight, England, United Kingdom	Cretaceous, Chalk Group, Grey Chalk	BURNETT, Mrs., May 1882	Presented
631	NHMUK PI P 5126	1	hand specimen				Siphonia ficus Goldfuss, 1833		Dover, Kent, England, United Kingdom	Cretaceous, Chalk Group	GRIFFITHS, Aug. 1897	Purchased
632	NHMUK PI S 7866	1	hand specimen				Siphonia ficus Goldfuss, 1833		Dover, Kent, England, United Kingdom	Cretaceous, Lower Chalk, Chalk Marl	ROWE, Arthur Walter, Nov 1926	Purchased
633	NHMUK PI P 1421 (1)	1	hand specimen				Siphonia ficus Goldfuss, 1833	Figured	Dover, Kent, England, United Kingdom	Cretaceous, Cenomanian	History unrecorded		Hinde, G.J. 1884. Catalogue of the Fossil Sponges in the Geological Department of the British Museum (Natural History). With descriptions of new and little-known species. BM(NH), London, 248 pp. (on pl.13, figs. 3, 3a)
634	NHMUK PI P 3531	1	hand specimen				Siphonia ficus Goldfuss, 1833		Ventnor, Isle of Wight, England, United Kingdom	Cretaceous, Lower Chalk, Chalk Marl	LEE, John Edward Collection, October 1885	Presented
635	NHMUK PI S 7813	1	hand specimen				Siphonia ficus Goldfuss, 1833		Folkestone, Kent, England, United Kingdom	Cretaceous, Chalk Group, Lower Chalk	ROWE, Arthur Walter, Nov 1926	Purchased
636	NHMUK PI S 7868	1	hand specimen				Siphonia ficus Goldfuss, 1833		Folkestone, Kent, England, United Kingdom	Cretaceous, Chalk Group, Lower Chalk	ROWE, Arthur Walter, Nov 1926	Purchased
637	NHMUK PI S 4865	1	hand specimen				Siphonia ficus Goldfuss, 1833	Figured	Coast near Worthing, Sussex, England, United Kingdom	Cretaceous, Chalk Group, Upper Chalk, Senonian	WAKEFIELD, Mrs. A., Jan, 1938	Purchased	Dixon, F. 1850. The geology and fossils of the Tertiary and Cretaceous formations of Sussex. London, 423 + xvi pp. (on p. 67-8, pl. xvii, fig. 9)
638	NHMUK PI S 4866	1	hand specimen				Siphonia ficus Goldfuss, 1833	Cited	Coast near Worthing, Sussex, England, United Kingdom	Cretaceous, Chalk Group, Upper Chalk, Senonian	WAKEFIELD, Mrs. A., Jan, 1938	Purchased	Dixon, F. 1850. The geology and fossils of the Tertiary and Cretaceous formations of Sussex. London, 423 + xvi pp. (on p. 67-8)
639	NHMUK PI S 5366	1	hand specimen				Siphonia ficus Goldfuss, 1833		Sandown Bay, Isle of Wight, England, United Kingdom	Cretaceous, Cenomanian	WALLIS, T. C. Owen, Oct 1946	Presented
640	NHMUK PI S 5365	1	hand specimen				Siphonia ficus Goldfuss, 1833		Culver Cliff, Isle of Wight, England, United Kingdom	Cretaceous, Cenomanian	WALLIS, T. C. Owen, Oct 1946	Presented
641	NHMUK PI S 4408	1	hand specimen				Siphonia ficus Goldfuss, 1833		Northfleet, Gravesend, Kent, England, United Kingdom	Cretaceous, Chalk Group, Upper Chalk	CUTLER, W. E., 1936
642	NHMUK PI P 1419	2	hand specimen				Siphonia ficus Goldfuss, 1833		Dover, Kent, England, United Kingdom	Cretaceous, Chalk Group, Lower Chalk	History unrecorded
643	NHMUK PI P 1421 (2)	1	hand specimen				Siphonia ficus Goldfuss, 1833		Dover, Kent, England, United Kingdom	Cretaceous, Chalk Group, Lower Chalk	History unrecorded
644	NHMUK PI P 1393	1	hand specimen				Siphonia ficus Goldfuss, 1833		Dover, Kent, England, United Kingdom	Cretaceous, Chalk Group, Upper Chalk	History unrecorded
645	NHMUK PI P 1420	1	hand specimen				Siphonia ficus Goldfuss, 1833		Dover, Kent, England, United Kingdom	Cretaceous, Chalk Group, Grey Chalk	History unrecorded
646	NHMUK PI P 1421 (3)	2	hand specimen				Siphonia ficus Goldfuss, 1833		Dover, Kent, England, United Kingdom	Cretaceous, Cenomanian	History unrecorded
647	NHMUK PI P 1421 (4)	2	hand specimen				Siphonia ficus Goldfuss, 1833		Dover, Kent, England, United Kingdom	Cretaceous, Chalk Group, Grey Chalk	History unrecorded
648	NHMUK PI P 1369	1	hand specimen				Siphonia ficus Goldfuss, 1833		Dover, Kent, England, United Kingdom	Cretaceous, Chalk Group	History unrecorded
649	NHMUK PI S 9652	1	hand specimen				Jerea Lamouroux, 1821		Dover, Kent, England, United Kingdom	Cretaceous, Cenomanian	ROWE, Arthur Walter, Nov 1926	Purchased
650	NHMUK PI S 7811	3	hand specimen				Siphonia ficus Goldfuss, 1833		Dover, Kent, England, United Kingdom	Cretaceous, Lower Chalk, Chalk Marl	ROWE, Arthur Walter, Nov 1926	Purchased
651	NHMUK PI S 7810	2	hand specimen				Siphonia ficus Goldfuss, 1833		Dover, Kent, England, United Kingdom	Cretaceous, Lower Chalk, Chalk Marl	ROWE, Arthur Walter, Nov 1926	Purchased
652	NHMUK PI S 9644	1	hand specimen				Jerea Lamouroux, 1821		Dover, Kent, England, United Kingdom	Cretaceous, Chalk Group, Grey Chalk	ROWE, Arthur Walter, Nov 1926	Purchased
653	NHMUK PI S 7812	1	hand specimen				Siphonia ficus Goldfuss, 1833		Dover, Kent, England, United Kingdom	Cretaceous, Lower Chalk, Chalk Marl	ROWE, Arthur Walter, Nov 1926	Purchased
654	NHMUK PI S 9651	1	hand specimen				Jerea Lamouroux, 1821		Dover, Kent, England, United Kingdom	Cretaceous, Chalk Group, Grey Chalk	ROWE, Arthur Walter, Nov 1926	Purchased
655	NHMUK PI S 7814	1	hand specimen				Siphonia ficus Goldfuss, 1833		Folkestone, Kent, England, United Kingdom	Cretaceous, Chalk Group, Grey Chalk	ROWE, Arthur Walter, Nov 1926	Purchased
656	NHMUK PI S 9642	1	hand specimen				Jerea Lamouroux, 1821		Dover, Kent, England, United Kingdom	Cretaceous, Chalk Group, Grey Chalk	ROWE, Arthur Walter, Nov 1926	Purchased
657	NHMUK PI S 6984	3	hand specimen				Siphonia ficus Goldfuss, 1833		Dover, Kent, England, United Kingdom	Cretaceous, Chalk Group, Grey Chalk	ROWE, Arthur Walter, Nov 1926	Purchased
658	NHMUK PI S 7815	2	hand specimen				Siphonia ficus Goldfuss, 1833		Dover, Kent, England, United Kingdom	Cretaceous, Lower Chalk, Chalk Marl	ROWE, Arthur Walter, Nov 1926	Purchased
659	NHMUK PI S 7801	1	hand specimen				Jerea Lamouroux, 1821		Dover, Kent, England, United Kingdom	Cretaceous, Lower Chalk, Chalk Marl	ROWE, Arthur Walter, Nov 1926	Purchased
660	NHMUK PI S 7816	1	hand specimen				Siphonia ficus Goldfuss, 1833		Dover, Kent, England, United Kingdom	Cretaceous, Lower Chalk, Chalk Marl	ROWE, Arthur Walter, Nov 1926	Purchased
661	NHMUK PI S 7808	2	hand specimen				Siphonia ficus Goldfuss, 1833		Dover, Kent, England, United Kingdom	Cretaceous, Lower Chalk, Chalk Marl	ROWE, Arthur Walter, Nov 1926	Purchased
662	NHMUK PI S 7818	3	hand specimen				Siphonia ficus Goldfuss, 1833		Dover, Kent, England, United Kingdom	Cretaceous, Lower Chalk, Chalk Marl	ROWE, Arthur Walter, Nov 1926	Purchased
663	NHMUK PI S 7817	2	hand specimen				Siphonia ficus Goldfuss, 1833		Dover, Kent, England, United Kingdom	Cretaceous, Lower Chalk, Chalk Marl	ROWE, Arthur Walter, Nov 1926	Purchased
664	NHMUK PI S 9641	1	hand specimen				Jerea Lamouroux, 1821		Dover, Kent, England, United Kingdom	Cretaceous, Cenomanian	ROWE, Arthur Walter, Nov 1926	Purchased
665	NHMUK PI S 9653	1	hand specimen				Jerea Lamouroux, 1821		Dover, Kent, England, United Kingdom	Cretaceous, Cenomanian	ROWE, Arthur Walter, Nov 1926	Purchased
666	NHMUK PI S 395	1	hand specimen				Jerea Lamouroux, 1821		Compton Bay, Isle of Wight, England, United Kingdom	Cretaceous, Cenomanian	History unrecorded
667	NHMUK PI P 1466	2	hand specimen				Jerea Lamouroux, 1821		South of England	Cretaceous, Chalk Group, Upper Chalk	History unrecorded
668	NHMUK PI S 5919	1	hand specimen				Jerea Lamouroux, 1821		Cambridge, Cambridgeshire, England, United Kingdom	Cretaceous, Cambridge Greensand	History unrecorded
669	NHMUK PI S 8224	1	hand specimen				Jerea Lamouroux, 1821		St. Lawrence, Isle of Wight, England United Kingdom	Cretaceous, Upper Greensand	FORD, R. L. E., Nov 1959	Presented
670	NHMUK PI S 8225	1	hand specimen				Jerea Lamouroux, 1821		St. Lawrence, Isle of Wight, England United Kingdom	Cretaceous, Upper Greensand	FORD, R. L. E., Nov 1959	Presented
671	NHMUK PI S 8226	1	hand specimen				Jerea Lamouroux, 1821		St. Lawrence, Isle of Wight, England United Kingdom	Cretaceous, Upper Greensand	FORD, R. L. E., Nov 1959	Presented
672	NHMUK PI S 8227	1	hand specimen				Jerea Lamouroux, 1821		St. Lawrence, Isle of Wight, England United Kingdom	Cretaceous, Upper Greensand	FORD, R. L. E., Nov 1959	Presented
673	NHMUK PI S 10109	1	hand specimen		14183	BM(NH) number	Jerea Lamouroux, 1821		Lower Upham Farm, Chiseldon, Wiltshire, England, United Kingdom	Cretaceous, Chalk Group, Upper Chalk, Turonian	WRIGHT, Claud William, Collection [1933]	Presented
674	NHMUK PI P 1462	1	hand specimen				Jerea Lamouroux, 1821		Warminster, Wiltshire, England, United Kingdom	Cretaceous, Upper Greensand	History unrecorded
675	NHMUK PI P 1462 $1	1	thin section				Jerea Lamouroux, 1821		Warminster, Wiltshire, England, United Kingdom	Cretaceous, Upper Greensand	History unrecorded
676	NHMUK PI P 1404	1	hand specimen				Jerea Lamouroux, 1821		Lydden Staircase, Kent, England, United Kingdom	Cretaceous, Chalk Group, Upper Chalk	BURNETT, Mrs., May 1882	Presented
677	NHMUK PI S 8196	1	hand specimen				Jerea Lamouroux, 1821		St. Lawrence, Isle of Wight, England United Kingdom	Cretaceous, Upper Greensand	FORD, R. L. E., Nov 1959	Presented
678	NHMUK PI S 8197	1	hand specimen				Jerea Lamouroux, 1821		St. Lawrence, Isle of Wight, England United Kingdom	Cretaceous, Upper Greensand	FORD, R. L. E., Nov 1959	Presented
679	NHMUK PI S 8198	1	hand specimen				Jerea Lamouroux, 1821		St. Lawrence, Isle of Wight, England United Kingdom	Cretaceous, Upper Greensand	FORD, R. L. E., Nov 1959	Presented
680	NHMUK PI P 1463	3	hand specimen				Jerea Lamouroux, 1821		Warminster, Wiltshire, England, United Kingdom	Cretaceous, Chalk Group, Upper Chalk	SMITH, Joshua Toulmin, 1869	Purchased
681	NHMUK PI S 7865	2	hand specimen				Jerea Lamouroux, 1821		Dover, Kent, England, United Kingdom	Cretaceous, Lower Chalk, Chalk Marl	ROWE, Arthur Walter, Nov 1926	Purchased
682	NHMUK PI S 7825	1	hand specimen				Jerea Lamouroux, 1821		Dover, Kent, England, United Kingdom	Cretaceous, Lower Chalk, Chalk Marl	ROWE, Arthur Walter, Nov 1926	Purchased
683	NHMUK PI S 7827 (2)	2	hand specimen				Jerea Lamouroux, 1821		Dover, Kent, England, United Kingdom	Cretaceous, Chalk Group, Grey Chalk	ROWE, Arthur Walter, Nov 1926	Purchased
684	NHMUK PI S 7824	2	hand specimen				Jerea Lamouroux, 1821		Dover, Kent, England, United Kingdom	Cretaceous, Lower Chalk, Chalk Marl	ROWE, Arthur Walter, Nov 1926	Purchased
685	NHMUK PI S 7803	2	hand specimen				?Nelumbia Pomel, 1872		Dover, Kent, England, United Kingdom	Cretaceous, Lower Chalk, Chalk Marl	ROWE, Arthur Walter, Nov 1926	Purchased
686	NHMUK PI S 7804	2	hand specimen				?Nelumbia Pomel, 1872		Dover, Kent, England, United Kingdom	Cretaceous, Lower Chalk, Chalk Marl	ROWE, Arthur Walter, Nov 1926	Purchased
687	NHMUK PI S 7433	2	hand specimen				?Nelumbia Pomel, 1872		Bishopstone, Salisbury, Wiltshire, England, United Kingdom	Cretaceous, Chalk Group, Lower Chalk	DAVIS, Arthur George, Nov 1953	Donated
688	NHMUK PI S 7434	1	hand specimen				?Nelumbia Pomel, 1872		Bishopstone, Salisbury, Wiltshire, England, United Kingdom	Cretaceous, Chalk Group, Lower Chalk	DAVIS, Arthur George, Nov 1953	Donated
689	NHMUK PI S 7435	1	hand specimen				?Nelumbia Pomel, 1872		Bishopstone, Salisbury, Wiltshire, England, United Kingdom	Cretaceous, Chalk Group, Lower Chalk	DAVIS, Arthur George, Nov 1953	Donated
690	NHMUK PI S 7436 (1)	1	hand specimen				?Nelumbia Pomel, 1872		Bishopstone, Salisbury, Wiltshire, England, United Kingdom	Cretaceous, Chalk Group, Lower Chalk	DAVIS, Arthur George, Nov 1953	Donated
691	NHMUK PI S 7437	1	hand specimen				?Nelumbia Pomel, 1872		Bishopstone, Salisbury, Wiltshire, England, United Kingdom	Cretaceous, Chalk Group, Lower Chalk	DAVIS, Arthur George, Nov 1953	Donated
692	NHMUK PI S 7880	1	hand specimen				?Nelumbia Pomel, 1872		Dover, Kent, England, United Kingdom	Cretaceous, Lower Chalk, Chalk Marl	ROWE, Arthur Walter, Nov 1926	Purchased
693	NHMUK PI S 7881	2	hand specimen				?Nelumbia Pomel, 1872		Dover, Kent, England, United Kingdom	Cretaceous, Lower Chalk, Chalk Marl	ROWE, Arthur Walter, Nov 1926	Purchased
694	NHMUK PI S 7882	1	hand specimen				?Nelumbia Pomel, 1872		Dover, Kent, England, United Kingdom	Cretaceous, Lower Chalk, Chalk Marl	ROWE, Arthur Walter, Nov 1926	Purchased
695	NHMUK PI S 5289	1	hand specimen				Nelumbia tuberosa Hinde, 1884		Hearthstone Quarries, Reigate, Surrey, England, United Kingdom	Cretaceous, Upper Greensand	History unrecorded
696	NHMUK PI P 1464	1	hand specimen				Nelumbia tuberosa Hinde, 1884	Figured	Dover, Kent, England, United Kingdom	Cretaceous, Chalk Group, Grey Chalk	History unrecorded		Hinde, G.J. 1884. Catalogue of the Fossil Sponges in the Geological Department of the British Museum (Natural History). With descriptions of new and little-known species. BM(NH), London, 248 pp. (on pl.16, figs. 1, 1a)
697	NHMUK PI P 1465 (1)	1	hand specimen				Nelumbia tuberosa Hinde, 1884		South of England	Cretaceous, Chalk Group, Upper Chalk	History unrecorded
698	NHMUK PI S 7798	2	hand specimen				Nelumbia tuberosa Hinde, 1884		Folkestone, Kent, England, United Kingdom	Cretaceous, Chalk Group, Grey Chalk	ROWE, Arthur Walter, Nov 1926	Purchased
699	NHMUK PI P 1465 (2)	1	hand specimen		56228	BM(NH) number	Nelumbia tuberosa Hinde, 1884	Figured	South of England	Cretaceous, Chalk Group, Upper Chalk	History unrecorded		Hinde, G.J. 1884. Catalogue of the Fossil Sponges in the Geological Department of the British Museum (Natural History). With descriptions of new and little-known species. BM(NH), London, 248 pp. (on pl.16, fig. 1c)
700	NHMUK PI P 3535	1	hand specimen				Nelumbia tuberosa Hinde, 1884		Ventnor, Isle of Wight, England, United Kingdom	Cretaceous, Lower Chalk, Chalk Marl	LEE, John Edward Collection, October 1885	Presented
701	NHMUK PI S 7867	1	hand specimen				Nelumbia tuberosa Hinde, 1884		Dover, Kent, England, United Kingdom	Cretaceous, Lower Chalk, Chalk Marl	ROWE, Arthur Walter, Nov 1926	Purchased
702	NHMUK PI S 7800	2	hand specimen				Nelumbia tuberosa Hinde, 1884		Dover, Kent, England, United Kingdom	Cretaceous, Lower Chalk, Chalk Marl	ROWE, Arthur Walter, Nov 1926	Purchased
703	NHMUK PI S 7799	2	hand specimen				Nelumbia tuberosa Hinde, 1884		Folkestone, Kent, England, United Kingdom	Cretaceous, Chalk Group, Grey Chalk	ROWE, Arthur Walter, Nov 1926	Purchased
704	NHMUK PI P 1468	1	hand specimen				Polyierea arbuscula (Hinde, 1884)		Warminster, Wiltshire, England, United Kingdom	Cretaceous, Upper Greensand	History unrecorded
705	NHMUK PI S 7795	1	hand specimen				Polyierea arbuscula (Hinde, 1884)		Dover, Kent, England, United Kingdom	Cretaceous, Chalk Group, Lower Chalk	ROWE, Arthur Walter, Nov 1926	Purchased
706	NHMUK PI S 7886	1	hand specimen				Polyierea arbuscula (Hinde, 1884)		Dover, Kent, England, United Kingdom	Cretaceous, Chalk Group, Lower Chalk	ROWE, Arthur Walter, Nov 1926	Purchased
707	NHMUK PI S 7820	1	hand specimen				Polyierea arbuscula (Hinde, 1884)		Dover, Kent, England, United Kingdom	Cretaceous, Chalk Group, Lower Chalk	ROWE, Arthur Walter, Nov 1926	Purchased
708	NHMUK PI S 9640	1	hand specimen				Polyierea arbuscula (Hinde, 1884)		Dover, Kent, England, United Kingdom	Cretaceous, Cenomanian	ROWE, Arthur Walter, Nov 1926	Purchased
709	NHMUK PI S 9637	1	hand specimen				Polyierea arbuscula (Hinde, 1884)		Dover, Kent, England, United Kingdom	Cretaceous, Cenomanian	ROWE, Arthur Walter, Nov 1926	Purchased
710	NHMUK PI S 7869	1	hand specimen				Polyierea arbuscula (Hinde, 1884)		Dover, Kent, England, United Kingdom	Cretaceous, Lower Chalk, Chalk Marl	ROWE, Arthur Walter, Nov 1926	Purchased
711	NHMUK PI S 9638	1	hand specimen				Polyierea arbuscula (Hinde, 1884)		Dover, Kent, England, United Kingdom	Cretaceous, Cenomanian	ROWE, Arthur Walter, Nov 1926	Purchased
712	NHMUK PI S 7863	1	hand specimen				Polyierea arbuscula (Hinde, 1884)		Folkestone, Kent, England, United Kingdom	Cretaceous, Chalk Group, Lower Chalk	ROWE, Arthur Walter, Nov 1926	Purchased
713	NHMUK PI S 7885	1	hand specimen				Polyierea arbuscula (Hinde, 1884)		Dover, Kent, England, United Kingdom	Cretaceous, Chalk Group, Lower Chalk	ROWE, Arthur Walter, Nov 1926	Purchased
714	NHMUK PI S 7862	3	hand specimen				Polyierea arbuscula (Hinde, 1884)		Dover, Kent, England, United Kingdom	Cretaceous, Lower Chalk, Chalk Marl	ROWE, Arthur Walter, Nov 1926	Purchased
715	NHMUK PI P 1467 (1)	1	hand specimen				Polyierea arbuscula (Hinde, 1884)	Figured	Dover, Kent, England, United Kingdom	Cretaceous, Cenomanian	History unrecorded		Hinde, G.J. 1884. Catalogue of the Fossil Sponges in the Geological Department of the British Museum (Natural History). With descriptions of new and little-known species. BM(NH), London, 248 pp. (on pl.16, figs. 2, 2a)
716	NHMUK PI P 1467 (2)	1	hand specimen				Polyierea arbuscula (Hinde, 1884)		Dover, Kent, England, United Kingdom	Cretaceous, Cenomanian	History unrecorded
717	NHMUK PI P 2247	1	hand specimen				Polyierea arbuscula (Hinde, 1884)		Dover, Kent, England, United Kingdom	Cretaceous, Chalk Group, Grey Chalk	History unrecorded
718	NHMUK PI S 9639	1	hand specimen				Polyierea arbuscula (Hinde, 1884)		Dover, Kent, England, United Kingdom	Cretaceous, Cenomanian	ROWE, Arthur Walter, Nov 1926	Purchased
719	NHMUK PI S 7794	2	hand specimen				Polyierea lobata (Hinde, 1884)		Dover, Kent, England, United Kingdom	Cretaceous, Lower Chalk, Chalk Marl	ROWE, Arthur Walter, Nov 1926	Purchased
720	NHMUK PI S 7793	2	hand specimen				Polyierea lobata (Hinde, 1884)		Sandown Bay, Isle of Wight, England, United Kingdom	Cretaceous, Chalk Group	ROWE, Arthur Walter, Nov 1926	Purchased
721	NHMUK PI S 7796	2	hand specimen				Polyierea lobata (Hinde, 1884)		Dover, Kent, England, United Kingdom	Cretaceous, Chalk Group, Lower Chalk	ROWE, Arthur Walter, Nov 1926	Purchased
722	NHMUK PI S 7826	2	hand specimen				Polyierea lobata (Hinde, 1884)		Dover, Kent, England, United Kingdom	Cretaceous, Chalk Group, Lower Chalk	ROWE, Arthur Walter, Nov 1926	Purchased
723	NHMUK PI S 7806	1	hand specimen				Polyierea lobata (Hinde, 1884)		Dover, Kent, England, United Kingdom	Cretaceous, Chalk Group, Lower Chalk	ROWE, Arthur Walter, Nov 1926	Purchased
724	NHMUK PI S 7807	2	hand specimen				Polyierea lobata (Hinde, 1884)		Dover, Kent, England, United Kingdom	Cretaceous, Lower Chalk, Chalk Marl	ROWE, Arthur Walter, Nov 1926	Purchased
725	NHMUK PI P 29	2	hand specimen				Polyierea lobata (Hinde, 1884)	Figured	Dover, Kent, England, United Kingdom	Cretaceous, Chalk Group, Grey Chalk	ROWE, Arthur Walter, Nov 1926	Purchased	Hinde, G.J. 1884. Catalogue of the Fossil Sponges in the Geological Department of the British Museum (Natural History). With descriptions of new and little-known species. BM(NH), London, 248 pp. (on pl.16, fig. 3)
726	NHMUK PI S 7797	2	hand specimen				Polyierea lobata (Hinde, 1884)		Dover, Kent, England, United Kingdom	Cretaceous, Chalk Group, Lower Chalk	ROWE, Arthur Walter, Nov 1926	Purchased
727	NHMUK PI S 7809	2	hand specimen				Polyierea lobata (Hinde, 1884)		Dover, Kent, England, United Kingdom	Cretaceous, Chalk Group, Lower Chalk	ROWE, Arthur Walter, Nov 1926	Purchased
728	NHMUK PI S 7802	2	hand specimen				Polyierea lobata (Hinde, 1884)		Dover, Kent, England, United Kingdom	Cretaceous, Lower Chalk, Chalk Marl	ROWE, Arthur Walter, Nov 1926	Purchased
729	NHMUK PI P 1198 (4)	1	hand specimen				Chenendopora michelinii Hinde, 1884		Warminster, Wiltshire, England, United Kingdom	Cretaceous, Upper Greensand	History unrecorded
730	NHMUK PI P 2243 (1)	6	hand specimen				Chenendopora michelinii Hinde, 1884		Warminster, Wiltshire, England, United Kingdom	Cretaceous, Upper Greensand	GARDNER, J. S., May 1884	Purchased
731	NHMUK PI P 1210	2	hand specimen				Chenendopora michelinii Hinde, 1884		Wiltshire, England, United Kingdom	Cretaceous, Upper Greensand	BRIGHT Collection
732	NHMUK PI P 1211	6	hand specimen				Chenendopora michelinii Hinde, 1884		Warminster, Wiltshire, England, United Kingdom	Cretaceous, Upper Greensand	BRIGHT Collection
733	NHMUK PI P 4181 (1)	4	hand specimen				Chenendopora michelinii Hinde, 1884		Warminster, Wiltshire, England, United Kingdom	Cretaceous, Upper Greensand	BABER, Mrs., May 1889	Purchased
734	NHMUK PI P 4181 (2)	1	hand specimen				Chenendopora michelinii Hinde, 1884		Warminster, Wiltshire, England, United Kingdom	Cretaceous, Upper Greensand	BABER, Mrs., May 1889	Purchased
735	NHMUK PI P 2243 (2)	2	hand specimen				Chenendopora michelinii Hinde, 1884		Warminster, Wiltshire, England, United Kingdom	Cretaceous, Upper Greensand	GARDNER, J. S., May 1884	Purchased
736	NHMUK PI P 3521 (2)	1	hand specimen				Chenendopora michelinii Hinde, 1884		Warminster, Wiltshire, England, United Kingdom	Cretaceous, Upper Greensand	LEE, John Edward Collection, October 1885	Presented
737	NHMUK PI P 1198 (5)	4	hand specimen				Chenendopora michelinii Hinde, 1884		Warminster, Wiltshire, England, United Kingdom	Cretaceous, Upper Greensand	History unrecorded
738	NHMUK PI P 1198 (6)	2	hand specimen				Chenendopora michelinii Hinde, 1884		Warminster, Wiltshire, England, United Kingdom	Cretaceous, Upper Greensand	History unrecorded
739	NHMUK PI P 1198 (7)	10	hand specimen				Chenendopora michelinii Hinde, 1884		Warminster, Wiltshire, England, United Kingdom	Cretaceous, Upper Greensand	History unrecorded
740	NHMUK PI P 1198 (1) $2	1	thin section				Chenendopora michelinii Hinde, 1884		Warminster, Wiltshire, England, United Kingdom	Cretaceous, Upper Greensand	History unrecorded
741	NHMUK PI P 3521 (1)	2	hand specimen				Chenendopora michelinii Hinde, 1884		Warminster, Wiltshire, England, United Kingdom	Cretaceous, Upper Greensand	History unrecorded
742	NHMUK PI P 1200	1	hand specimen				Chenendopora fungiformis Lamouroux, 1821		Warminster, Wiltshire, England, United Kingdom	Cretaceous, Upper Greensand	History unrecorded
743	NHMUK PI P 1198 (8)	2	hand specimen				Chenendopora michelinii Hinde, 1884	Figured	Warminster, Wiltshire, England, United Kingdom	Cretaceous, Upper Greensand	History unrecorded		Hinde, G.J. 1884. Catalogue of the Fossil Sponges in the Geological Department of the British Museum (Natural History). With descriptions of new and little-known species. BM(NH), London, 248 pp. (on pl.3, fig. 1)
744	NHMUK PI S 4546	1	hand specimen				Chenendopora michelinii Hinde, 1884	Figured	Warminster, Wiltshire, England, United Kingdom	Cretaceous, Upper Greensand	History unrecorded		Oakley, K.P. 1937. Cretaceous sponges: some biological and geological considerations. Proceedings of the Geologists' Association, 48: 330-348. (on pl. 32, fig. 3)
745	NHMUK PI P 1198 (9)	2	hand specimen				Chenendopora michelinii Hinde, 1884		Warminster, Wiltshire, England, United Kingdom	Cretaceous, Upper Greensand	History unrecorded
746	NHMUK PI P 1198 (10)	2	hand specimen				Chenendopora michelinii Hinde, 1884	Figured	Warminster, Wiltshire, England, United Kingdom	Cretaceous, Upper Greensand	History unrecorded		Hinde, G.J. 1884. Catalogue of the Fossil Sponges in the Geological Department of the British Museum (Natural History). With descriptions of new and little-known species. BM(NH), London, 248 pp. (on pl.3, figs. 1a, 1b)
747	NHMUK PI P 1198 (11)	3	hand specimen				Chenendopora michelinii Hinde, 1884		Warminster, Wiltshire, England, United Kingdom	Cretaceous, Upper Greensand	History unrecorded
748	NHMUK PI P 1497 (1)	1	hand specimen				Chenendopora michelinii Hinde, 1884		Chapmanslade, Wiltshire, England, United Kingdom	Cretaceous, Upper Greensand	History unrecorded
749	NHMUK PI S 7478	1	hand specimen				Chenendopora michelinii Hinde, 1884		Shallacombe Goyle, Little Haldon, Devon, England, United Kingdom	Cretaceous, Upper Greensand	METCALFE, H. F., May 1953	Donated
750	NHMUK PI P 1197	1	hand specimen				Chenendopora michelinii Hinde, 1884	Figured	Wiltshire, England, United Kingdom	Cretaceous, Upper Greensand	History unrecorded		Parkinson, J. 1808. Organic Remains of a Former World. An examination of the mineralized remains of the Vegetables and Animals of the antediluvian world, generally termed extraneous fossils. Volume 2, London, 286 pp. (on frontisp., p. 125)	Hinde, G.J. 1884. Catalogue of the Fossil Sponges in the Geological Department of the British Museum (Natural History). With descriptions of new and little-known species. BM(NH), London, 248 pp. (on pl. 3, figs. 1, 1a, 1b)	Lewis, C. 2017. The Enlightened Mr. Parkinson: The Pioneering Life of a Forgotten English Surgeon. Icon Books, London, 320 pp.
751	NHMUK PI P 1361	2	hand specimen				Trachysycon sulcatum Hinde, 1884	Figured	South of England	Cretaceous, Chalk Group, Upper Chalk	History unrecorded		Hinde, G.J. 1884. Catalogue of the Fossil Sponges in the Geological Department of the British Museum (Natural History). With descriptions of new and little-known species. BM(NH), London, 248 pp. (on pl.12, figs. 2, 2a, 2b)
752	NHMUK PI P 1360	2	hand specimen				Trachysycon sulcatum Hinde, 1884	Syntype	South of England	Cretaceous, Chalk Group, Upper Chalk	History unrecorded
753	NHMUK PI P 7735	4	hand specimen				Trachysycon sulcatum Hinde, 1884		Undercliff, Highport, Ventnor, Isle of Wight, England, United Kingdom	Cretaceous, Chalk Group, Upper Chalk	History unrecorded
754	NHMUK PI P 7736	1	hand specimen				Trachysycon sulcatum Hinde, 1884		Undercliff, Highport, Ventnor, Isle of Wight, England, United Kingdom	Cretaceous, Chalk Group, Upper Chalk	History unrecorded
755	NHMUK PI P 1359 (1)	2	hand specimen				Trachysycon sulcatum Hinde, 1884	Figured	Warminster, Wiltshire, England, United Kingdom	Cretaceous, Upper Greensand	History unrecorded		Hinde, G.J. 1884. Catalogue of the Fossil Sponges in the Geological Department of the British Museum (Natural History). With descriptions of new and little-known species. BM(NH), London, 248 pp. (on pl.12, figs. 3, 3a, 3b)
756	NHMUK PI P 1362	2	hand specimen				Trachysycon nodosum Hinde, 1884		Wiltshire, England, United Kingdom	Cretaceous, Upper Greensand	History unrecorded
757	NHMUK PI P 1364	3	hand specimen				Trachysycon nodosum Hinde, 1884		Wiltshire, England, United Kingdom	Cretaceous, Upper Greensand	History unrecorded
758	NHMUK PI P 1359 (2)	2	hand specimen				Trachysycon nodosum Hinde, 1884		Warminster, Wiltshire, England, United Kingdom	Cretaceous, Upper Greensand	History unrecorded
759	NHMUK PI P 1359 (1) $1	1	thin section				Trachysycon nodosum Hinde, 1884		Warminster, Wiltshire, England, United Kingdom	Cretaceous, Upper Greensand	History unrecorded
760	NHMUK PI S 7879	3	hand specimen				Trachysycon sulcatum Hinde, 1884		Paulgrove Pit, Portsdown Hills, Hampshire, England, United Kingdom	Cretaceous, Chalk Group, Upper Chalk	History unrecorded
761	NHMUK PI P 1495 (1)	1	hand specimen				Kalpinella rugosa Hinde, 1884		Warminster, Wiltshire, England, United Kingdom	Cretaceous, Upper Greensand	History unrecorded
762	NHMUK PI P 1495 (2)	2	hand specimen				Kalpinella rugosa Hinde, 1884		Warminster, Wiltshire, England, United Kingdom	Cretaceous, Upper Greensand	History unrecorded
763	NHMUK PI P 1495 (3)	1	hand specimen				Kalpinella rugosa Hinde, 1884		Warminster, Wiltshire, England, United Kingdom	Cretaceous, Upper Greensand	History unrecorded
764	NHMUK PI P 1495 (1) $1	1	thin section				Kalpinella rugosa Hinde, 1884		Warminster, Wiltshire, England, United Kingdom	Cretaceous, Upper Greensand	History unrecorded
765	NHMUK PI S 9645	1	hand specimen				Kalpinella Hinde, 1884		Dover, Kent, England, United Kingdom	Cretaceous, Chalk Group, Grey Chalk	History unrecorded
766	NHMUK PI S 9646	1	hand specimen				Kalpinella Hinde, 1884		South of England	Cretaceous	History unrecorded
767	NHMUK PI P 1498	1	hand specimen				Kalpinella pateraeformis Hinde, 1884		[South of England]	Cretaceous, Upper Greensand	History unrecorded
768	NHMUK PI S 7875	3	hand specimen				Kalpinella pateraeformis Hinde, 1884		Dover, Kent, England, United Kingdom	Cretaceous, Lower Chalk, Chalk Marl	ROWE, Arthur Walter, Nov 1926	Purchased
769	NHMUK PI S 7805	1	hand specimen				Kalpinella pateraeformis Hinde, 1884		Dover, Kent, England, United Kingdom	Cretaceous, Lower Chalk, Chalk Marl	ROWE, Arthur Walter, Nov 1926	Purchased
770	NHMUK PI S 7846	3	hand specimen				Kalpinella pateraeformis Hinde, 1884		Dover, Kent, England, United Kingdom	Cretaceous, Lower Chalk, Chalk Marl	ROWE, Arthur Walter, Nov 1926	Purchased
771	NHMUK PI S 7949	1	hand specimen				Kalpinella pateraeformis Hinde, 1884		Isle of Wight, England, United Kingdom	Cretaceous, Upper Greensand	ROWE, Arthur Walter, Nov 1926	Purchased
772	NHMUK PI S 7950	1	hand specimen				Kalpinella pateraeformis Hinde, 1884		Isle of Wight, England, United Kingdom	Cretaceous, Upper Greensand	ROWE, Arthur Walter, Nov 1926	Purchased
773	NHMUK PI P 1504	1	hand specimen				Kalpinella pateraeformis Hinde, 1884		Warminster, Wiltshire, England, United Kingdom	Cretaceous, Upper Greensand	LUDLAM, Henry, July 1871	Presented
774	NHMUK PI S 3628	1	hand specimen				Kalpinella pateraeformis Hinde, 1884		Beachy Head, Eastbourne, Sussex, England, United Kingdom	Cretaceous, Cenonamian, Chloritic Marl	BULL, A.J., 18 May 1931
775	NHMUK PI P 1497 (2)	2	hand specimen				Kalpinella pateraeformis Hinde, 1884		Warminster, Wiltshire, England, United Kingdom	Cretaceous, Upper Greensand	TENNANT, James, 1881-2	Purchased
776	NHMUK PI P 3973	2	hand specimen				Kalpinella pateraeformis Hinde, 1884		Folkestone, Kent, England, United Kingdom	Cretaceous, Chalk Group, Lower Chalk	BUTLER Collection	Purchased
777	NHMUK PI S 6983	3	hand specimen				Kalpinella pateraeformis Hinde, 1884		Dover, Kent, England, United Kingdom	Cretaceous, Chalk Group, Lower Chalk	ROWE, Arthur Walter, Nov 1926	Purchased
778	NHMUK PI P 1497 (3)	3	hand specimen				Kalpinella pateraeformis Hinde, 1884	Figured	Warminster, Wiltshire, England, United Kingdom	Cretaceous, Upper Greensand	History unrecorded		Hinde, G.J. 1884. Catalogue of the Fossil Sponges in the Geological Department of the British Museum (Natural History). With descriptions of new and little-known species. BM(NH), London, 248 pp. (on pl.18, fig. 4, pl.19, fig. 1a)
779	NHMUK PI P 1497 (4)	1	hand specimen				Kalpinella pateraeformis Hinde, 1884	Figured	Warminster, Wiltshire, England, United Kingdom	Cretaceous, Upper Greensand	History unrecorded		Hinde, G.J. 1884. Catalogue of the Fossil Sponges in the Geological Department of the British Museum (Natural History). With descriptions of new and little-known species. BM(NH), London, 248 pp. (on pl.19, fig. 1)
780	NHMUK PI P 1497 (5)	2	hand specimen				Kalpinella pateraeformis Hinde, 1884		Warminster, Wiltshire, England, United Kingdom	Cretaceous, Upper Greensand	History unrecorded
781	NHMUK PI P 1497 (6)	4	hand specimen				Kalpinella pateraeformis Hinde, 1884		Warminster, Wiltshire, England, United Kingdom	Cretaceous, Upper Greensand	History unrecorded
782	NHMUK PI P 1497 (7)	1	hand specimen				Kalpinella pateraeformis Hinde, 1884		Warminster, Wiltshire, England, United Kingdom	Cretaceous, Upper Greensand	TENNANT, James, 1881-2	Purchased
783	NHMUK PI S 10504	1	hand specimen				Verruculina Zittel, 1878		Yorkshire; Sewerby Steps, Sewerby, Bridlington, Foreshore exposures to the SE of Sewerby Steps, Sewerby, NE of Bridlington, England, United Kingdom	Cretaceous, Late Cretaceous, Campanian. Flamborough Sponge Bed. local Offaster pilula Zone - Inoceramus lingua Zone	WARD, David, J., 19 Oct 1994	Donated
784	NHMUK PI S 10505	1	hand specimen				Verruculina Zittel, 1878		Yorkshire; Sewerby Steps, Sewerby, Bridlington, Foreshore exposures to the SE of Sewerby Steps, Sewerby, NE of Bridlington, England, United Kingdom	Cretaceous, Late Cretaceous, Campanian. Flamborough Sponge Bed. local Offaster pilula Zone - Inoceramus lingua Zone	WARD, David, J., 19 Oct 1994	Donated
785	NHMUK PI S 10507	1	hand specimen				Verruculina Zittel, 1878		Yorkshire; Sewerby Steps, Sewerby, Bridlington, Foreshore exposures to the SE of Sewerby Steps, Sewerby, NE of Bridlington, England, United Kingdom	Cretaceous, Late Cretaceous, Campanian. Flamborough Sponge Bed. local Offaster pilula Zone - Inoceramus lingua Zone	WARD, David, J., 19 Oct 1994	Donated
786	NHMUK PI S 10508	1	hand specimen				Verruculina Zittel, 1878		Yorkshire; Sewerby Steps, Sewerby, Bridlington, Foreshore exposures to the SE of Sewerby Steps, Sewerby, NE of Bridlington, England, United Kingdom	Cretaceous, Late Cretaceous, Campanian. Flamborough Sponge Bed. local Offaster pilula Zone - Inoceramus lingua Zone	WARD, David, J., 19 Oct 1994	Donated
787	NHMUK PI S 10509	1	hand specimen				Verruculina Zittel, 1878		Yorkshire; Sewerby Steps, Sewerby, Bridlington, Foreshore exposures to the SE of Sewerby Steps, Sewerby, NE of Bridlington, England, United Kingdom	Cretaceous, Late Cretaceous, Campanian. Flamborough Sponge Bed. local Offaster pilula Zone - Inoceramus lingua Zone	WARD, David, J., 19 Oct 1994	Donated
788	NHMUK PI S 10510	1	hand specimen				Verruculina Zittel, 1878		Yorkshire; Sewerby Steps, Sewerby, Bridlington, Foreshore exposures to the SE of Sewerby Steps, Sewerby, NE of Bridlington, England, United Kingdom	Cretaceous, Late Cretaceous, Campanian. Flamborough Sponge Bed. local Offaster pilula Zone - Inoceramus lingua Zone	WARD, David, J., 19 Oct 1994	Donated
789	NHMUK PI S 10511	1	hand specimen				Verruculina Zittel, 1878		Yorkshire; Sewerby Steps, Sewerby, Bridlington, Foreshore exposures to the SE of Sewerby Steps, Sewerby, NE of Bridlington, England, United Kingdom	Cretaceous, Late Cretaceous, Campanian. Flamborough Sponge Bed. local Offaster pilula Zone - Inoceramus lingua Zone	WARD, David, J., 19 Oct 1994	Donated
790	NHMUK PI S 10512	1	hand specimen				Verruculina Zittel, 1878		Yorkshire; Sewerby Steps, Sewerby, Bridlington, Foreshore exposures to the SE of Sewerby Steps, Sewerby, NE of Bridlington, England, United Kingdom	Cretaceous, Late Cretaceous, Campanian. Flamborough Sponge Bed. local Offaster pilula Zone - Inoceramus lingua Zone	WARD, David, J., 19 Oct 1994	Donated
791	NHMUK PI S 10513	1	hand specimen				Verruculina Zittel, 1878		Yorkshire; Sewerby Steps, Sewerby, Bridlington, Foreshore exposures to the SE of Sewerby Steps, Sewerby, NE of Bridlington, England, United Kingdom	Cretaceous, Late Cretaceous, Campanian. Flamborough Sponge Bed. local Offaster pilula Zone - Inoceramus lingua Zone	WARD, David, J., 19 Oct 1994	Donated
792	NHMUK PI S 10514	1	hand specimen				Verruculina Zittel, 1878		Yorkshire; Sewerby Steps, Sewerby, Bridlington, Foreshore exposures to the SE of Sewerby Steps, Sewerby, NE of Bridlington, England, United Kingdom	Cretaceous, Late Cretaceous, Campanian. Flamborough Sponge Bed. local Offaster pilula Zone - Inoceramus lingua Zone	WARD, David, J., 19 Oct 1994	Donated
793	NHMUK PI S 10515	1	hand specimen				Verruculina Zittel, 1878		Yorkshire; Sewerby Steps, Sewerby, Bridlington, Foreshore exposures to the SE of Sewerby Steps, Sewerby, NE of Bridlington, England, United Kingdom	Cretaceous, Late Cretaceous, Campanian. Flamborough Sponge Bed. local Offaster pilula Zone - Inoceramus lingua Zone	WARD, David, J., 19 Oct 1994	Donated
794	NHMUK PI S 10516	1	hand specimen				Verruculina Zittel, 1878		Yorkshire; Sewerby Steps, Sewerby, Bridlington, Foreshore exposures to the SE of Sewerby Steps, Sewerby, NE of Bridlington, England, United Kingdom	Cretaceous, Late Cretaceous, Campanian. Flamborough Sponge Bed. local Offaster pilula Zone - Inoceramus lingua Zone	WARD, David, J., 19 Oct 1994	Donated
795	NHMUK PI S 10517	1	hand specimen				Verruculina Zittel, 1878		Yorkshire; Sewerby Steps, Sewerby, Bridlington, Foreshore exposures to the SE of Sewerby Steps, Sewerby, NE of Bridlington, England, United Kingdom	Cretaceous, Late Cretaceous, Campanian. Flamborough Sponge Bed. local Offaster pilula Zone - Inoceramus lingua Zone	WARD, David, J., 19 Oct 1994	Donated
796	NHMUK PI S 10518	1	hand specimen				Verruculina Zittel, 1878		Yorkshire; Sewerby Steps, Sewerby, Bridlington, Foreshore exposures to the SE of Sewerby Steps, Sewerby, NE of Bridlington, England, United Kingdom	Cretaceous, Late Cretaceous, Campanian. Flamborough Sponge Bed. local Offaster pilula Zone - Inoceramus lingua Zone	WARD, David, J., 19 Oct 1994	Donated
797	NHMUK PI S 10519	1	hand specimen				Verruculina Zittel, 1878		Yorkshire; Sewerby Steps, Sewerby, Bridlington, Foreshore exposures to the SE of Sewerby Steps, Sewerby, NE of Bridlington, England, United Kingdom	Cretaceous, Late Cretaceous, Campanian. Flamborough Sponge Bed. local Offaster pilula Zone - Inoceramus lingua Zone	WARD, David, J., 19 Oct 1994	Donated
798	NHMUK PI S 10520	1	hand specimen				Verruculina Zittel, 1878		Yorkshire; Sewerby Steps, Sewerby, Bridlington, Foreshore exposures to the SE of Sewerby Steps, Sewerby, NE of Bridlington, England, United Kingdom	Cretaceous, Late Cretaceous, Campanian. Flamborough Sponge Bed. local Offaster pilula Zone - Inoceramus lingua Zone	WARD, David, J., 19 Oct 1994	Donated
799	NHMUK PI S 10521	1	hand specimen				Verruculina Zittel, 1878		Yorkshire; Sewerby Steps, Sewerby, Bridlington, Foreshore exposures to the SE of Sewerby Steps, Sewerby, NE of Bridlington, England, United Kingdom	Cretaceous, Late Cretaceous, Campanian. Flamborough Sponge Bed. local Offaster pilula Zone - Inoceramus lingua Zone	WARD, David, J., 19 Oct 1994	Donated
800	NHMUK PI S 10522	1	hand specimen				Verruculina Zittel, 1878		Yorkshire; Sewerby Steps, Sewerby, Bridlington, Foreshore exposures to the SE of Sewerby Steps, Sewerby, NE of Bridlington, England, United Kingdom	Cretaceous, Late Cretaceous, Campanian. Flamborough Sponge Bed. local Offaster pilula Zone - Inoceramus lingua Zone	WARD, David, J., 19 Oct 1994	Donated
801	NHMUK PI S 10523	1	hand specimen				Verruculina Zittel, 1878		Yorkshire; Sewerby Steps, Sewerby, Bridlington, Foreshore exposures to the SE of Sewerby Steps, Sewerby, NE of Bridlington, England, United Kingdom	Cretaceous, Late Cretaceous, Campanian. Flamborough Sponge Bed. local Offaster pilula Zone - Inoceramus lingua Zone	WARD, David, J., 19 Oct 1994	Donated
802	NHMUK PI S 10524	1	hand specimen				Verruculina Zittel, 1878		Yorkshire; Sewerby Steps, Sewerby, Bridlington, Foreshore exposures to the SE of Sewerby Steps, Sewerby, NE of Bridlington, England, United Kingdom	Cretaceous, Late Cretaceous, Campanian. Flamborough Sponge Bed. local Offaster pilula Zone - Inoceramus lingua Zone	WARD, David, J., 19 Oct 1994	Donated
803	NHMUK PI S 10525	1	hand specimen				Verruculina Zittel, 1878		Yorkshire; Sewerby Steps, Sewerby, Bridlington, Foreshore exposures to the SE of Sewerby Steps, Sewerby, NE of Bridlington, England, United Kingdom	Cretaceous, Late Cretaceous, Campanian. Flamborough Sponge Bed. local Offaster pilula Zone - Inoceramus lingua Zone	WARD, David, J., 19 Oct 1994	Donated
804	NHMUK PI S 10526	1	hand specimen				Verruculina Zittel, 1878		Yorkshire; Sewerby Steps, Sewerby, Bridlington, Foreshore exposures to the SE of Sewerby Steps, Sewerby, NE of Bridlington, England, United Kingdom	Cretaceous, Late Cretaceous, Campanian. Flamborough Sponge Bed. local Offaster pilula Zone - Inoceramus lingua Zone	WARD, David, J., 19 Oct 1994	Donated
805	NHMUK PI S 10527	1	hand specimen				Verruculina Zittel, 1878		Yorkshire; Sewerby Steps, Sewerby, Bridlington, Foreshore exposures to the SE of Sewerby Steps, Sewerby, NE of Bridlington, England, United Kingdom	Cretaceous, Late Cretaceous, Campanian. Flamborough Sponge Bed. local Offaster pilula Zone - Inoceramus lingua Zone	WARD, David, J., 19 Oct 1994	Donated
806	NHMUK PI S 10528	1	hand specimen				Verruculina Zittel, 1878		Yorkshire; Sewerby Steps, Sewerby, Bridlington, Foreshore exposures to the SE of Sewerby Steps, Sewerby, NE of Bridlington, England, United Kingdom	Cretaceous, Late Cretaceous, Campanian. Flamborough Sponge Bed. local Offaster pilula Zone - Inoceramus lingua Zone	WARD, David, J., 19 Oct 1994	Donated
807	NHMUK PI S 10529	1	hand specimen				Verruculina Zittel, 1878		Yorkshire; Sewerby Steps, Sewerby, Bridlington, Foreshore exposures to the SE of Sewerby Steps, Sewerby, NE of Bridlington, England, United Kingdom	Cretaceous, Late Cretaceous, Campanian. Flamborough Sponge Bed. local Offaster pilula Zone - Inoceramus lingua Zone	WARD, David, J., 19 Oct 1994	Donated
808	NHMUK PI S 10530	1	hand specimen				Verruculina Zittel, 1878		Yorkshire; Sewerby Steps, Sewerby, Bridlington, Foreshore exposures to the SE of Sewerby Steps, Sewerby, NE of Bridlington, England, United Kingdom	Cretaceous, Late Cretaceous, Campanian. Flamborough Sponge Bed. local Offaster pilula Zone - Inoceramus lingua Zone	WARD, David, J., 19 Oct 1994	Donated
809	NHMUK PI S 10531	1	hand specimen				Verruculina Zittel, 1878		Yorkshire; Sewerby Steps, Sewerby, Bridlington, Foreshore exposures to the SE of Sewerby Steps, Sewerby, NE of Bridlington, England, United Kingdom	Cretaceous, Late Cretaceous, Campanian. Flamborough Sponge Bed. local Offaster pilula Zone - Inoceramus lingua Zone	WARD, David, J., 19 Oct 1994	Donated
810	NHMUK PI S 10532	1	hand specimen				Verruculina Zittel, 1878		Yorkshire; Sewerby Steps, Sewerby, Bridlington, Foreshore exposures to the SE of Sewerby Steps, Sewerby, NE of Bridlington, England, United Kingdom	Cretaceous, Late Cretaceous, Campanian. Flamborough Sponge Bed. local Offaster pilula Zone - Inoceramus lingua Zone	WARD, David, J., 19 Oct 1994	Donated
811	NHMUK PI S 10533	1	hand specimen				Verruculina Zittel, 1878		Yorkshire; Sewerby Steps, Sewerby, Bridlington, Foreshore exposures to the SE of Sewerby Steps, Sewerby, NE of Bridlington, England, United Kingdom	Cretaceous, Late Cretaceous, Campanian. Flamborough Sponge Bed. local Offaster pilula Zone - Inoceramus lingua Zone	WARD, David, J., 19 Oct 1994	Donated
812	NHMUK PI S 10534	1	hand specimen				Verruculina Zittel, 1878		Yorkshire; Sewerby Steps, Sewerby, Bridlington, Foreshore exposures to the SE of Sewerby Steps, Sewerby, NE of Bridlington, England, United Kingdom	Cretaceous, Late Cretaceous, Campanian. Flamborough Sponge Bed. local Offaster pilula Zone - Inoceramus lingua Zone	WARD, David, J., 19 Oct 1994	Donated
813	NHMUK PI S 10535	1	hand specimen				Verruculina Zittel, 1878		Yorkshire; Sewerby Steps, Sewerby, Bridlington, Foreshore exposures to the SE of Sewerby Steps, Sewerby, NE of Bridlington, England, United Kingdom	Cretaceous, Late Cretaceous, Campanian. Flamborough Sponge Bed. local Offaster pilula Zone - Inoceramus lingua Zone	WARD, David, J., 19 Oct 1994	Donated
814	NHMUK PI S 10536	1	hand specimen				Verruculina Zittel, 1878		Yorkshire; Sewerby Steps, Sewerby, Bridlington, Foreshore exposures to the SE of Sewerby Steps, Sewerby, NE of Bridlington, England, United Kingdom	Cretaceous, Late Cretaceous, Campanian. Flamborough Sponge Bed. local Offaster pilula Zone - Inoceramus lingua Zone	WARD, David, J., 19 Oct 1994	Donated
815	NHMUK PI S 10537	1	hand specimen				Verruculina Zittel, 1878		Yorkshire; Sewerby Steps, Sewerby, Bridlington, Foreshore exposures to the SE of Sewerby Steps, Sewerby, NE of Bridlington, England, United Kingdom	Cretaceous, Late Cretaceous, Campanian. Flamborough Sponge Bed. local Offaster pilula Zone - Inoceramus lingua Zone	WARD, David, J., 19 Oct 1994	Donated
816	NHMUK PI S 10538	1	hand specimen				Verruculina Zittel, 1878		Yorkshire; Sewerby Steps, Sewerby, Bridlington, Foreshore exposures to the SE of Sewerby Steps, Sewerby, NE of Bridlington, England, United Kingdom	Cretaceous, Late Cretaceous, Campanian. Flamborough Sponge Bed. local Offaster pilula Zone - Inoceramus lingua Zone	WARD, David, J., 19 Oct 1994	Donated
817	NHMUK PI S 10539	1	hand specimen				Verruculina Zittel, 1878		Yorkshire; Sewerby Steps, Sewerby, Bridlington, Foreshore exposures to the SE of Sewerby Steps, Sewerby, NE of Bridlington, England, United Kingdom	Cretaceous, Late Cretaceous, Campanian. Flamborough Sponge Bed. local Offaster pilula Zone - Inoceramus lingua Zone	WARD, David, J., 19 Oct 1994	Donated
818	NHMUK PI S 10540	1	hand specimen				Verruculina Zittel, 1878		Yorkshire; Sewerby Steps, Sewerby, Bridlington, Foreshore exposures to the SE of Sewerby Steps, Sewerby, NE of Bridlington, England, United Kingdom	Cretaceous, Late Cretaceous, Campanian. Flamborough Sponge Bed. local Offaster pilula Zone - Inoceramus lingua Zone	WARD, David, J., 19 Oct 1994	Donated
819	NHMUK PI S 10541	1	hand specimen				Verruculina Zittel, 1878		Yorkshire; Sewerby Steps, Sewerby, Bridlington, Foreshore exposures to the SE of Sewerby Steps, Sewerby, NE of Bridlington, England, United Kingdom	Cretaceous, Late Cretaceous, Campanian. Flamborough Sponge Bed. local Offaster pilula Zone - Inoceramus lingua Zone	WARD, David, J., 19 Oct 1994	Donated
820	NHMUK PI S 10542	1	hand specimen				Verruculina Zittel, 1878		Yorkshire; Sewerby Steps, Sewerby, Bridlington, Foreshore exposures to the SE of Sewerby Steps, Sewerby, NE of Bridlington, England, United Kingdom	Cretaceous, Late Cretaceous, Campanian. Flamborough Sponge Bed. local Offaster pilula Zone - Inoceramus lingua Zone	WARD, David, J., 19 Oct 1994	Donated
821	NHMUK PI S 10543	1	hand specimen				Verruculina Zittel, 1878		Yorkshire; Sewerby Steps, Sewerby, Bridlington, Foreshore exposures to the SE of Sewerby Steps, Sewerby, NE of Bridlington, England, United Kingdom	Cretaceous, Late Cretaceous, Campanian. Flamborough Sponge Bed. local Offaster pilula Zone - Inoceramus lingua Zone	WARD, David, J., 19 Oct 1994	Donated
822	NHMUK PI S 10544	1	hand specimen				Verruculina Zittel, 1878		Yorkshire; Sewerby Steps, Sewerby, Bridlington, Foreshore exposures to the SE of Sewerby Steps, Sewerby, NE of Bridlington, England, United Kingdom	Cretaceous, Late Cretaceous, Campanian. Flamborough Sponge Bed. local Offaster pilula Zone - Inoceramus lingua Zone	WARD, David, J., 19 Oct 1994	Donated
823	NHMUK PI S 10545	1	hand specimen				Verruculina Zittel, 1878		Yorkshire; Sewerby Steps, Sewerby, Bridlington, Foreshore exposures to the SE of Sewerby Steps, Sewerby, NE of Bridlington, England, United Kingdom	Cretaceous, Late Cretaceous, Campanian. Flamborough Sponge Bed. local Offaster pilula Zone - Inoceramus lingua Zone	WARD, David, J., 19 Oct 1994	Donated
824	NHMUK PI S 10546	1	hand specimen				Verruculina Zittel, 1878		Yorkshire; Sewerby Steps, Sewerby, Bridlington, Foreshore exposures to the SE of Sewerby Steps, Sewerby, NE of Bridlington, England, United Kingdom	Cretaceous, Late Cretaceous, Campanian. Flamborough Sponge Bed. local Offaster pilula Zone - Inoceramus lingua Zone	WARD, David, J., 19 Oct 1994	Donated
825	NHMUK PI S 10547	1	hand specimen				Verruculina Zittel, 1878		Yorkshire; Sewerby Steps, Sewerby, Bridlington, Foreshore exposures to the SE of Sewerby Steps, Sewerby, NE of Bridlington, England, United Kingdom	Cretaceous, Late Cretaceous, Campanian. Flamborough Sponge Bed. local Offaster pilula Zone - Inoceramus lingua Zone	WARD, David, J., 19 Oct 1994	Donated
826	NHMUK PI S 10548	1	hand specimen				Verruculina Zittel, 1878		Yorkshire; Sewerby Steps, Sewerby, Bridlington, Foreshore exposures to the SE of Sewerby Steps, Sewerby, NE of Bridlington, England, United Kingdom	Cretaceous, Late Cretaceous, Campanian. Flamborough Sponge Bed. local Offaster pilula Zone - Inoceramus lingua Zone	WARD, David, J., 19 Oct 1994	Donated
827	NHMUK PI S 10549	1	hand specimen				Verruculina Zittel, 1878		Yorkshire; Sewerby Steps, Sewerby, Bridlington, Foreshore exposures to the SE of Sewerby Steps, Sewerby, NE of Bridlington, England, United Kingdom	Cretaceous, Late Cretaceous, Campanian. Flamborough Sponge Bed. local Offaster pilula Zone - Inoceramus lingua Zone	WARD, David, J., 19 Oct 1994	Donated
828	NHMUK PI S 10550	1	hand specimen				Verruculina Zittel, 1878		Yorkshire; Sewerby Steps, Sewerby, Bridlington, Foreshore exposures to the SE of Sewerby Steps, Sewerby, NE of Bridlington, England, United Kingdom	Cretaceous, Late Cretaceous, Campanian. Flamborough Sponge Bed. local Offaster pilula Zone - Inoceramus lingua Zone	WARD, David, J., 19 Oct 1994	Donated
829	NHMUK PI S 10551	1	hand specimen				Verruculina Zittel, 1878		Yorkshire; Sewerby Steps, Sewerby, Bridlington, Foreshore exposures to the SE of Sewerby Steps, Sewerby, NE of Bridlington, England, United Kingdom	Cretaceous, Late Cretaceous, Campanian. Flamborough Sponge Bed. local Offaster pilula Zone - Inoceramus lingua Zone	WARD, David, J., 19 Oct 1994	Donated
830	NHMUK PI S 10552	1	hand specimen				Verruculina Zittel, 1878		Yorkshire; Sewerby Steps, Sewerby, Bridlington, Foreshore exposures to the SE of Sewerby Steps, Sewerby, NE of Bridlington, England, United Kingdom	Cretaceous, Late Cretaceous, Campanian. Flamborough Sponge Bed. local Offaster pilula Zone - Inoceramus lingua Zone	WARD, David, J., 19 Oct 1994	Donated
831	NHMUK PI S 10553	1	hand specimen				Aulosoma radiciformis (Phillips, 1835)		Yorkshire; Sewerby Steps, Sewerby, Bridlington, Foreshore exposures to the SE of Sewerby Steps, Sewerby, NE of Bridlington, England, United Kingdom	Cretaceous, Late Cretaceous, Campanian. Flamborough Sponge Bed. local Offaster pilula Zone - Inoceramus lingua Zone	WARD, David, J., 19 Oct 1994	Donated
832	NHMUK PI S 10554	1	hand specimen				Aulosoma radiciformis (Phillips, 1835)		Yorkshire; Sewerby Steps, Sewerby, Bridlington, Foreshore exposures to the SE of Sewerby Steps, Sewerby, NE of Bridlington, England, United Kingdom	Cretaceous, Late Cretaceous, Campanian. Flamborough Sponge Bed. local Offaster pilula Zone - Inoceramus lingua Zone	WARD, David, J., 19 Oct 1994	Donated
833	NHMUK PI S 10555	1	hand specimen				Aulosoma radiciformis (Phillips, 1835)		Yorkshire; Sewerby Steps, Sewerby, Bridlington, Foreshore exposures to the SE of Sewerby Steps, Sewerby, NE of Bridlington, England, United Kingdom	Cretaceous, Late Cretaceous, Campanian. Flamborough Sponge Bed. local Offaster pilula Zone - Inoceramus lingua Zone	WARD, David, J., 19 Oct 1994	Donated
834	NHMUK PI S 10556	1	hand specimen				Aulosoma radiciformis (Phillips, 1835)		Yorkshire; Sewerby Steps, Sewerby, Bridlington, Foreshore exposures to the SE of Sewerby Steps, Sewerby, NE of Bridlington, England, United Kingdom	Cretaceous, Late Cretaceous, Campanian. Flamborough Sponge Bed. local Offaster pilula Zone - Inoceramus lingua Zone	WARD, David, J., 19 Oct 1994	Donated
835	NHMUK PI S 10557	1	hand specimen				Aulosoma radiciformis (Phillips, 1835)		Yorkshire; Sewerby Steps, Sewerby, Bridlington, Foreshore exposures to the SE of Sewerby Steps, Sewerby, NE of Bridlington, England, United Kingdom	Cretaceous, Late Cretaceous, Campanian. Flamborough Sponge Bed. local Offaster pilula Zone - Inoceramus lingua Zone	WARD, David, J., 19 Oct 1994	Donated
836	NHMUK PI S 10558	1	hand specimen				Aulosoma radiciformis (Phillips, 1835)		Yorkshire; Sewerby Steps, Sewerby, Bridlington, Foreshore exposures to the SE of Sewerby Steps, Sewerby, NE of Bridlington, England, United Kingdom	Cretaceous, Late Cretaceous, Campanian. Flamborough Sponge Bed. local Offaster pilula Zone - Inoceramus lingua Zone	WARD, David, J., 19 Oct 1994	Donated
837	NHMUK PI S 10559	1	hand specimen				Aulosoma radiciformis (Phillips, 1835)		Yorkshire; Sewerby Steps, Sewerby, Bridlington, Foreshore exposures to the SE of Sewerby Steps, Sewerby, NE of Bridlington, England, United Kingdom	Cretaceous, Late Cretaceous, Campanian. Flamborough Sponge Bed. local Offaster pilula Zone - Inoceramus lingua Zone	WARD, David, J., 19 Oct 1994	Donated
838	NHMUK PI S 10560	1	hand specimen				Aulosoma radiciformis (Phillips, 1835)		Yorkshire; Sewerby Steps, Sewerby, Bridlington, Foreshore exposures to the SE of Sewerby Steps, Sewerby, NE of Bridlington, England, United Kingdom	Cretaceous, Late Cretaceous, Campanian. Flamborough Sponge Bed. local Offaster pilula Zone - Inoceramus lingua Zone	WARD, David, J., 19 Oct 1994	Donated
839	NHMUK PI S 10561	1	hand specimen				Aulosoma radiciformis (Phillips, 1835)		Yorkshire; Sewerby Steps, Sewerby, Bridlington, Foreshore exposures to the SE of Sewerby Steps, Sewerby, NE of Bridlington, England, United Kingdom	Cretaceous, Late Cretaceous, Campanian. Flamborough Sponge Bed. local Offaster pilula Zone - Inoceramus lingua Zone	WARD, David, J., 19 Oct 1994	Donated
840	NHMUK PI S 10562	1	hand specimen				Aulosoma radiciformis (Phillips, 1835)		Yorkshire; Sewerby Steps, Sewerby, Bridlington, Foreshore exposures to the SE of Sewerby Steps, Sewerby, NE of Bridlington, England, United Kingdom	Cretaceous, Late Cretaceous, Campanian. Flamborough Sponge Bed. local Offaster pilula Zone - Inoceramus lingua Zone	WARD, David, J., 19 Oct 1994	Donated
841	NHMUK PI S 10563	1	hand specimen				Aulosoma radiciformis (Phillips, 1835)		Yorkshire; Sewerby Steps, Sewerby, Bridlington, Foreshore exposures to the SE of Sewerby Steps, Sewerby, NE of Bridlington, England, United Kingdom	Cretaceous, Late Cretaceous, Campanian. Flamborough Sponge Bed. local Offaster pilula Zone - Inoceramus lingua Zone	WARD, David, J., 19 Oct 1994	Donated
842	NHMUK PI S 10564	1	hand specimen				Aulosoma radiciformis (Phillips, 1835)		Yorkshire; Sewerby Steps, Sewerby, Bridlington, Foreshore exposures to the SE of Sewerby Steps, Sewerby, NE of Bridlington, England, United Kingdom	Cretaceous, Late Cretaceous, Campanian. Flamborough Sponge Bed. local Offaster pilula Zone - Inoceramus lingua Zone	WARD, David, J., 19 Oct 1994	Donated
843	NHMUK PI S 10565	1	hand specimen				Aulosoma radiciformis (Phillips, 1835)		Yorkshire; Sewerby Steps, Sewerby, Bridlington, Foreshore exposures to the SE of Sewerby Steps, Sewerby, NE of Bridlington, England, United Kingdom	Cretaceous, Late Cretaceous, Campanian. Flamborough Sponge Bed. local Offaster pilula Zone - Inoceramus lingua Zone	WARD, David, J., 19 Oct 1994	Donated
844	NHMUK PI S 10566	1	hand specimen				Aulosoma radiciformis (Phillips, 1835)		Yorkshire; Sewerby Steps, Sewerby, Bridlington, Foreshore exposures to the SE of Sewerby Steps, Sewerby, NE of Bridlington, England, United Kingdom	Cretaceous, Late Cretaceous, Campanian. Flamborough Sponge Bed. local Offaster pilula Zone - Inoceramus lingua Zone	WARD, David, J., 19 Oct 1994	Donated
845	NHMUK PI S 10567	1	hand specimen				Aulosoma radiciformis (Phillips, 1835)		Yorkshire; Sewerby Steps, Sewerby, Bridlington, Foreshore exposures to the SE of Sewerby Steps, Sewerby, NE of Bridlington, England, United Kingdom	Cretaceous, Late Cretaceous, Campanian. Flamborough Sponge Bed. local Offaster pilula Zone - Inoceramus lingua Zone	WARD, David, J., 19 Oct 1994	Donated
846	NHMUK PI S 10568	1	hand specimen				Aulosoma radiciformis (Phillips, 1835)		Yorkshire; Sewerby Steps, Sewerby, Bridlington, Foreshore exposures to the SE of Sewerby Steps, Sewerby, NE of Bridlington, England, United Kingdom	Cretaceous, Late Cretaceous, Campanian. Flamborough Sponge Bed. local Offaster pilula Zone - Inoceramus lingua Zone	WARD, David, J., 19 Oct 1994	Donated
847	NHMUK PI S 10569	1	hand specimen				Aulosoma radiciformis (Phillips, 1835)		Yorkshire; Sewerby Steps, Sewerby, Bridlington, Foreshore exposures to the SE of Sewerby Steps, Sewerby, NE of Bridlington, England, United Kingdom	Cretaceous, Late Cretaceous, Campanian. Flamborough Sponge Bed. local Offaster pilula Zone - Inoceramus lingua Zone	WARD, David, J., 19 Oct 1994	Donated
848	NHMUK PI S 10570	1	hand specimen				Aulosoma radiciformis (Phillips, 1835)		Yorkshire; Sewerby Steps, Sewerby, Bridlington, Foreshore exposures to the SE of Sewerby Steps, Sewerby, NE of Bridlington, England, United Kingdom	Cretaceous, Late Cretaceous, Campanian. Flamborough Sponge Bed. local Offaster pilula Zone - Inoceramus lingua Zone	WARD, David, J., 19 Oct 1994	Donated
849	NHMUK PI S 10571	1	hand specimen				Aulosoma radiciformis (Phillips, 1835)		Yorkshire; Sewerby Steps, Sewerby, Bridlington, Foreshore exposures to the SE of Sewerby Steps, Sewerby, NE of Bridlington, England, United Kingdom	Cretaceous, Late Cretaceous, Campanian. Flamborough Sponge Bed. local Offaster pilula Zone - Inoceramus lingua Zone	WARD, David, J., 19 Oct 1994	Donated
850	NHMUK PI S 10572	1	hand specimen				Aulosoma radiciformis (Phillips, 1835)		Yorkshire; Sewerby Steps, Sewerby, Bridlington, Foreshore exposures to the SE of Sewerby Steps, Sewerby, NE of Bridlington, England, United Kingdom	Cretaceous, Late Cretaceous, Campanian. Flamborough Sponge Bed. local Offaster pilula Zone - Inoceramus lingua Zone	WARD, David, J., 19 Oct 1994	Donated
851	NHMUK PI S 10573	1	hand specimen				Aulosoma radiciformis (Phillips, 1835)		Yorkshire; Sewerby Steps, Sewerby, Bridlington, Foreshore exposures to the SE of Sewerby Steps, Sewerby, NE of Bridlington, England, United Kingdom	Cretaceous, Late Cretaceous, Campanian. Flamborough Sponge Bed. local Offaster pilula Zone - Inoceramus lingua Zone	WARD, David, J., 19 Oct 1994	Donated
852	NHMUK PI S 10574	1	hand specimen				Aulosoma radiciformis (Phillips, 1835)		Yorkshire; Sewerby Steps, Sewerby, Bridlington, Foreshore exposures to the SE of Sewerby Steps, Sewerby, NE of Bridlington, England, United Kingdom	Cretaceous, Late Cretaceous, Campanian. Flamborough Sponge Bed. local Offaster pilula Zone - Inoceramus lingua Zone	WARD, David, J., 19 Oct 1994	Donated
853	NHMUK PI S 10575	1	hand specimen				Aulosoma radiciformis (Phillips, 1835)		Yorkshire; Sewerby Steps, Sewerby, Bridlington, Foreshore exposures to the SE of Sewerby Steps, Sewerby, NE of Bridlington, England, United Kingdom	Cretaceous, Late Cretaceous, Campanian. Flamborough Sponge Bed. local Offaster pilula Zone - Inoceramus lingua Zone	WARD, David, J., 19 Oct 1994	Donated
854	NHMUK PI S 10576	1	hand specimen				Aulosoma radiciformis (Phillips, 1835)		Yorkshire; Sewerby Steps, Sewerby, Bridlington, Foreshore exposures to the SE of Sewerby Steps, Sewerby, NE of Bridlington, England, United Kingdom	Cretaceous, Late Cretaceous, Campanian. Flamborough Sponge Bed. local Offaster pilula Zone - Inoceramus lingua Zone	WARD, David, J., 19 Oct 1994	Donated
855	NHMUK PI S 10577	1	hand specimen				Aulosoma radiciformis (Phillips, 1835)		Yorkshire; Sewerby Steps, Sewerby, Bridlington, Foreshore exposures to the SE of Sewerby Steps, Sewerby, NE of Bridlington, England, United Kingdom	Cretaceous, Late Cretaceous, Campanian. Flamborough Sponge Bed. local Offaster pilula Zone - Inoceramus lingua Zone	WARD, David, J., 19 Oct 1994	Donated
856	NHMUK PI S 10578	1	hand specimen				Aulosoma radiciformis (Phillips, 1835)		Yorkshire; Sewerby Steps, Sewerby, Bridlington, Foreshore exposures to the SE of Sewerby Steps, Sewerby, NE of Bridlington, England, United Kingdom	Cretaceous, Late Cretaceous, Campanian. Flamborough Sponge Bed. local Offaster pilula Zone - Inoceramus lingua Zone	WARD, David, J., 19 Oct 1994	Donated
857	NHMUK PI S 10579	1	hand specimen				Aulosoma radiciformis (Phillips, 1835)		Yorkshire; Sewerby Steps, Sewerby, Bridlington, Foreshore exposures to the SE of Sewerby Steps, Sewerby, NE of Bridlington, England, United Kingdom	Cretaceous, Late Cretaceous, Campanian. Flamborough Sponge Bed. local Offaster pilula Zone - Inoceramus lingua Zone	WARD, David, J., 19 Oct 1994	Donated
858	NHMUK PI S 10580	1	hand specimen				Aulosoma radiciformis (Phillips, 1835)		Yorkshire; Sewerby Steps, Sewerby, Bridlington, Foreshore exposures to the SE of Sewerby Steps, Sewerby, NE of Bridlington, England, United Kingdom	Cretaceous, Late Cretaceous, Campanian. Flamborough Sponge Bed. local Offaster pilula Zone - Inoceramus lingua Zone	WARD, David, J., 19 Oct 1994	Donated
859	NHMUK PI S 10581	1	hand specimen				Aulosoma radiciformis (Phillips, 1835)		Yorkshire; Sewerby Steps, Sewerby, Bridlington, Foreshore exposures to the SE of Sewerby Steps, Sewerby, NE of Bridlington, England, United Kingdom	Cretaceous, Late Cretaceous, Campanian. Flamborough Sponge Bed. local Offaster pilula Zone - Inoceramus lingua Zone	WARD, David, J., 19 Oct 1994	Donated
860	NHMUK PI S 10582	1	hand specimen				Aulosoma radiciformis (Phillips, 1835)		Yorkshire; Sewerby Steps, Sewerby, Bridlington, Foreshore exposures to the SE of Sewerby Steps, Sewerby, NE of Bridlington, England, United Kingdom	Cretaceous, Late Cretaceous, Campanian. Flamborough Sponge Bed. local Offaster pilula Zone - Inoceramus lingua Zone	WARD, David, J., 19 Oct 1994	Donated
861	NHMUK PI S 10583	1	hand specimen				Aulosoma radiciformis (Phillips, 1835)		Yorkshire; Sewerby Steps, Sewerby, Bridlington, Foreshore exposures to the SE of Sewerby Steps, Sewerby, NE of Bridlington, England, United Kingdom	Cretaceous, Late Cretaceous, Campanian. Flamborough Sponge Bed. local Offaster pilula Zone - Inoceramus lingua Zone	WARD, David, J., 19 Oct 1994	Donated
862	NHMUK PI S 10584	1	hand specimen				Aulosoma radiciformis (Phillips, 1835)		Yorkshire; Sewerby Steps, Sewerby, Bridlington, Foreshore exposures to the SE of Sewerby Steps, Sewerby, NE of Bridlington, England, United Kingdom	Cretaceous, Late Cretaceous, Campanian. Flamborough Sponge Bed. local Offaster pilula Zone - Inoceramus lingua Zone	WARD, David, J., 19 Oct 1994	Donated
863	NHMUK PI S 10585	1	hand specimen				Aulosoma radiciformis (Phillips, 1835)		Yorkshire; Sewerby Steps, Sewerby, Bridlington, Foreshore exposures to the SE of Sewerby Steps, Sewerby, NE of Bridlington, England, United Kingdom	Cretaceous, Late Cretaceous, Campanian. Flamborough Sponge Bed. local Offaster pilula Zone - Inoceramus lingua Zone	WARD, David, J., 19 Oct 1994	Donated
864	NHMUK PI S 10586	1	hand specimen				Aulosoma radiciformis (Phillips, 1835)		Yorkshire; Sewerby Steps, Sewerby, Bridlington, Foreshore exposures to the SE of Sewerby Steps, Sewerby, NE of Bridlington, England, United Kingdom	Cretaceous, Late Cretaceous, Campanian. Flamborough Sponge Bed. local Offaster pilula Zone - Inoceramus lingua Zone	WARD, David, J., 19 Oct 1994	Donated
865	NHMUK PI S 10587	1	hand specimen				Aulosoma radiciformis (Phillips, 1835)		Yorkshire; Sewerby Steps, Sewerby, Bridlington, Foreshore exposures to the SE of Sewerby Steps, Sewerby, NE of Bridlington, England, United Kingdom	Cretaceous, Late Cretaceous, Campanian. Flamborough Sponge Bed. local Offaster pilula Zone - Inoceramus lingua Zone	WARD, David, J., 19 Oct 1994	Donated
866	NHMUK PI S 10588	1	hand specimen				Aulosoma radiciformis (Phillips, 1835)		Yorkshire; Sewerby Steps, Sewerby, Bridlington, Foreshore exposures to the SE of Sewerby Steps, Sewerby, NE of Bridlington, England, United Kingdom	Cretaceous, Late Cretaceous, Campanian. Flamborough Sponge Bed. local Offaster pilula Zone - Inoceramus lingua Zone	WARD, David, J., 19 Oct 1994	Donated
867	NHMUK PI S 10589	1	hand specimen				Aulosoma radiciformis (Phillips, 1835)		Yorkshire; Sewerby Steps, Sewerby, Bridlington, Foreshore exposures to the SE of Sewerby Steps, Sewerby, NE of Bridlington, England, United Kingdom	Cretaceous, Late Cretaceous, Campanian. Flamborough Sponge Bed. local Offaster pilula Zone - Inoceramus lingua Zone	WARD, David, J., 19 Oct 1994	Donated
868	NHMUK PI S 10590	1	hand specimen				Aulosoma radiciformis (Phillips, 1835)		Yorkshire; Sewerby Steps, Sewerby, Bridlington, Foreshore exposures to the SE of Sewerby Steps, Sewerby, NE of Bridlington, England, United Kingdom	Cretaceous, Late Cretaceous, Campanian. Flamborough Sponge Bed. local Offaster pilula Zone - Inoceramus lingua Zone	WARD, David, J., 19 Oct 1994	Donated
869	NHMUK PI S 10591	1	hand specimen				Aulosoma radiciformis (Phillips, 1835)		Yorkshire; Sewerby Steps, Sewerby, Bridlington, Foreshore exposures to the SE of Sewerby Steps, Sewerby, NE of Bridlington, England, United Kingdom	Cretaceous, Late Cretaceous, Campanian. Flamborough Sponge Bed. local Offaster pilula Zone - Inoceramus lingua Zone	WARD, David, J., 19 Oct 1994	Donated
870	NHMUK PI S 10592	1	hand specimen				Aulosoma radiciformis (Phillips, 1835)		Yorkshire; Sewerby Steps, Sewerby, Bridlington, Foreshore exposures to the SE of Sewerby Steps, Sewerby, NE of Bridlington, England, United Kingdom	Cretaceous, Late Cretaceous, Campanian. Flamborough Sponge Bed. local Offaster pilula Zone - Inoceramus lingua Zone	WARD, David, J., 19 Oct 1994	Donated
871	NHMUK PI S 10593	1	hand specimen				Aulosoma radiciformis (Phillips, 1835)		Yorkshire; Sewerby Steps, Sewerby, Bridlington, Foreshore exposures to the SE of Sewerby Steps, Sewerby, NE of Bridlington, England, United Kingdom	Cretaceous, Late Cretaceous, Campanian. Flamborough Sponge Bed. local Offaster pilula Zone - Inoceramus lingua Zone	WARD, David, J., 19 Oct 1994	Donated
872	NHMUK PI S 10594	1	hand specimen				Aulosoma radiciformis (Phillips, 1835)		Yorkshire; Sewerby Steps, Sewerby, Bridlington, Foreshore exposures to the SE of Sewerby Steps, Sewerby, NE of Bridlington, England, United Kingdom	Cretaceous, Late Cretaceous, Campanian. Flamborough Sponge Bed. local Offaster pilula Zone - Inoceramus lingua Zone	WARD, David, J., 19 Oct 1994	Donated
873	NHMUK PI S 10595	1	hand specimen				Aulosoma radiciformis (Phillips, 1835)		Yorkshire; Sewerby Steps, Sewerby, Bridlington, Foreshore exposures to the SE of Sewerby Steps, Sewerby, NE of Bridlington, England, United Kingdom	Cretaceous, Late Cretaceous, Campanian. Flamborough Sponge Bed. local Offaster pilula Zone - Inoceramus lingua Zone	WARD, David, J., 19 Oct 1994	Donated
874	NHMUK PI S 10596	1	hand specimen				Aulosoma radiciformis (Phillips, 1835)		Yorkshire; Sewerby Steps, Sewerby, Bridlington, Foreshore exposures to the SE of Sewerby Steps, Sewerby, NE of Bridlington, England, United Kingdom	Cretaceous, Late Cretaceous, Campanian. Flamborough Sponge Bed. local Offaster pilula Zone - Inoceramus lingua Zone	WARD, David, J., 19 Oct 1994	Donated
875	NHMUK PI S 10597	1	hand specimen				Aulosoma radiciformis (Phillips, 1835)		Yorkshire; Sewerby Steps, Sewerby, Bridlington, Foreshore exposures to the SE of Sewerby Steps, Sewerby, NE of Bridlington, England, United Kingdom	Cretaceous, Late Cretaceous, Campanian. Flamborough Sponge Bed. local Offaster pilula Zone - Inoceramus lingua Zone	WARD, David, J., 19 Oct 1994	Donated
876	NHMUK PI S 10598	1	hand specimen				Aulosoma radiciformis (Phillips, 1835)		Yorkshire; Sewerby Steps, Sewerby, Bridlington, Foreshore exposures to the SE of Sewerby Steps, Sewerby, NE of Bridlington, England, United Kingdom	Cretaceous, Late Cretaceous, Campanian. Flamborough Sponge Bed. local Offaster pilula Zone - Inoceramus lingua Zone	WARD, David, J., 19 Oct 1994	Donated
877	NHMUK PI S 10599	1	hand specimen				Aulosoma radiciformis (Phillips, 1835)		Yorkshire; Sewerby Steps, Sewerby, Bridlington, Foreshore exposures to the SE of Sewerby Steps, Sewerby, NE of Bridlington, England, United Kingdom	Cretaceous, Late Cretaceous, Campanian. Flamborough Sponge Bed. local Offaster pilula Zone - Inoceramus lingua Zone	WARD, David, J., 19 Oct 1994	Donated
878	NHMUK PI S 10600	1	hand specimen				Aulosoma radiciformis (Phillips, 1835)		Yorkshire; Sewerby Steps, Sewerby, Bridlington, Foreshore exposures to the SE of Sewerby Steps, Sewerby, NE of Bridlington, England, United Kingdom	Cretaceous, Late Cretaceous, Campanian. Flamborough Sponge Bed. local Offaster pilula Zone - Inoceramus lingua Zone	WARD, David, J., 19 Oct 1994	Donated
879	NHMUK PI S 10601	1	hand specimen				Aulosoma radiciformis (Phillips, 1835)		Yorkshire; Sewerby Steps, Sewerby, Bridlington, Foreshore exposures to the SE of Sewerby Steps, Sewerby, NE of Bridlington, England, United Kingdom	Cretaceous, Late Cretaceous, Campanian. Flamborough Sponge Bed. local Offaster pilula Zone - Inoceramus lingua Zone	WARD, David, J., 19 Oct 1994	Donated
880	NHMUK PI S 10602	1	hand specimen				Aulosoma radiciformis (Phillips, 1835)		Yorkshire; Sewerby Steps, Sewerby, Bridlington, Foreshore exposures to the SE of Sewerby Steps, Sewerby, NE of Bridlington, England, United Kingdom	Cretaceous, Late Cretaceous, Campanian. Flamborough Sponge Bed. local Offaster pilula Zone - Inoceramus lingua Zone	WARD, David, J., 19 Oct 1994	Donated
881	NHMUK PI S 10603	1	hand specimen				Aulosoma radiciformis (Phillips, 1835)		Yorkshire; Sewerby Steps, Sewerby, Bridlington, Foreshore exposures to the SE of Sewerby Steps, Sewerby, NE of Bridlington, England, United Kingdom	Cretaceous, Late Cretaceous, Campanian. Flamborough Sponge Bed. local Offaster pilula Zone - Inoceramus lingua Zone	WARD, David, J., 19 Oct 1994	Donated
882	NHMUK PI S 10604	1	hand specimen				Aulosoma radiciformis (Phillips, 1835)		Yorkshire; Sewerby Steps, Sewerby, Bridlington, Foreshore exposures to the SE of Sewerby Steps, Sewerby, NE of Bridlington, England, United Kingdom	Cretaceous, Late Cretaceous, Campanian. Flamborough Sponge Bed. local Offaster pilula Zone - Inoceramus lingua Zone	WARD, David, J., 19 Oct 1994	Donated
883	NHMUK PI S 10605	1	hand specimen				Aulosoma radiciformis (Phillips, 1835)		Yorkshire; Sewerby Steps, Sewerby, Bridlington, Foreshore exposures to the SE of Sewerby Steps, Sewerby, NE of Bridlington, England, United Kingdom	Cretaceous, Late Cretaceous, Campanian. Flamborough Sponge Bed. local Offaster pilula Zone - Inoceramus lingua Zone	WARD, David, J., 19 Oct 1994	Donated
884	NHMUK PI S 10606	1	hand specimen				Aulosoma radiciformis (Phillips, 1835)		Yorkshire; Sewerby Steps, Sewerby, Bridlington, Foreshore exposures to the SE of Sewerby Steps, Sewerby, NE of Bridlington, England, United Kingdom	Cretaceous, Late Cretaceous, Campanian. Flamborough Sponge Bed. local Offaster pilula Zone - Inoceramus lingua Zone	WARD, David, J., 19 Oct 1994	Donated
885	NHMUK PI S 10607	1	hand specimen				Aulosoma radiciformis (Phillips, 1835)		Yorkshire; Sewerby Steps, Sewerby, Bridlington, Foreshore exposures to the SE of Sewerby Steps, Sewerby, NE of Bridlington, England, United Kingdom	Cretaceous, Late Cretaceous, Campanian. Flamborough Sponge Bed. local Offaster pilula Zone - Inoceramus lingua Zone	WARD, David, J., 19 Oct 1994	Donated
886	NHMUK PI S 10608	1	hand specimen				Aulosoma radiciformis (Phillips, 1835)		Yorkshire; Sewerby Steps, Sewerby, Bridlington, Foreshore exposures to the SE of Sewerby Steps, Sewerby, NE of Bridlington, England, United Kingdom	Cretaceous, Late Cretaceous, Campanian. Flamborough Sponge Bed. local Offaster pilula Zone - Inoceramus lingua Zone	WARD, David, J., 19 Oct 1994	Donated
887	NHMUK PI S 10609	1	hand specimen				Aulosoma radiciformis (Phillips, 1835)		Yorkshire; Sewerby Steps, Sewerby, Bridlington, Foreshore exposures to the SE of Sewerby Steps, Sewerby, NE of Bridlington, England, United Kingdom	Cretaceous, Late Cretaceous, Campanian. Flamborough Sponge Bed. local Offaster pilula Zone - Inoceramus lingua Zone	WARD, David, J., 19 Oct 1994	Donated
888	NHMUK PI S 10610	1	hand specimen				Aulosoma radiciformis (Phillips, 1835)		Yorkshire; Sewerby Steps, Sewerby, Bridlington, Foreshore exposures to the SE of Sewerby Steps, Sewerby, NE of Bridlington, England, United Kingdom	Cretaceous, Late Cretaceous, Campanian. Flamborough Sponge Bed. local Offaster pilula Zone - Inoceramus lingua Zone	WARD, David, J., 19 Oct 1994	Donated
889	NHMUK PI S 10611	1	hand specimen				Aulosoma radiciformis (Phillips, 1835)		Yorkshire; Sewerby Steps, Sewerby, Bridlington, Foreshore exposures to the SE of Sewerby Steps, Sewerby, NE of Bridlington, England, United Kingdom	Cretaceous, Late Cretaceous, Campanian. Flamborough Sponge Bed. local Offaster pilula Zone - Inoceramus lingua Zone	WARD, David, J., 19 Oct 1994	Donated
890	NHMUK PI S 10612	1	hand specimen				Aulosoma radiciformis (Phillips, 1835)		Yorkshire; Sewerby Steps, Sewerby, Bridlington, Foreshore exposures to the SE of Sewerby Steps, Sewerby, NE of Bridlington, England, United Kingdom	Cretaceous, Late Cretaceous, Campanian. Flamborough Sponge Bed. local Offaster pilula Zone - Inoceramus lingua Zone	WARD, David, J., 19 Oct 1994	Donated
891	NHMUK PI S 10613	1	hand specimen				Aulosoma radiciformis (Phillips, 1835)		Yorkshire; Sewerby Steps, Sewerby, Bridlington, Foreshore exposures to the SE of Sewerby Steps, Sewerby, NE of Bridlington, England, United Kingdom	Cretaceous, Late Cretaceous, Campanian. Flamborough Sponge Bed. local Offaster pilula Zone - Inoceramus lingua Zone	WARD, David, J., 19 Oct 1994	Donated
892	NHMUK PI S 10614	1	hand specimen				Aulosoma radiciformis (Phillips, 1835)		Yorkshire; Sewerby Steps, Sewerby, Bridlington, Foreshore exposures to the SE of Sewerby Steps, Sewerby, NE of Bridlington, England, United Kingdom	Cretaceous, Late Cretaceous, Campanian. Flamborough Sponge Bed. local Offaster pilula Zone - Inoceramus lingua Zone	WARD, David, J., 19 Oct 1994	Donated
893	NHMUK PI S 10615	1	hand specimen				Aulosoma radiciformis (Phillips, 1835)		Yorkshire; Sewerby Steps, Sewerby, Bridlington, Foreshore exposures to the SE of Sewerby Steps, Sewerby, NE of Bridlington, England, United Kingdom	Cretaceous, Late Cretaceous, Campanian. Flamborough Sponge Bed. local Offaster pilula Zone - Inoceramus lingua Zone	WARD, David, J., 19 Oct 1994	Donated
894	NHMUK PI S 10616	1	hand specimen				Aulosoma radiciformis (Phillips, 1835)		Yorkshire; Sewerby Steps, Sewerby, Bridlington, Foreshore exposures to the SE of Sewerby Steps, Sewerby, NE of Bridlington, England, United Kingdom	Cretaceous, Late Cretaceous, Campanian. Flamborough Sponge Bed. local Offaster pilula Zone - Inoceramus lingua Zone	WARD, David, J., 19 Oct 1994	Donated
895	NHMUK PI S 10617	1	hand specimen				Aulosoma radiciformis (Phillips, 1835)		Yorkshire; Sewerby Steps, Sewerby, Bridlington, Foreshore exposures to the SE of Sewerby Steps, Sewerby, NE of Bridlington, England, United Kingdom	Cretaceous, Late Cretaceous, Campanian. Flamborough Sponge Bed. local Offaster pilula Zone - Inoceramus lingua Zone	WARD, David, J., 19 Oct 1994	Donated
896	NHMUK PI S 10618	1	hand specimen				Aulosoma radiciformis (Phillips, 1835)		Yorkshire; Sewerby Steps, Sewerby, Bridlington, Foreshore exposures to the SE of Sewerby Steps, Sewerby, NE of Bridlington, England, United Kingdom	Cretaceous, Late Cretaceous, Campanian. Flamborough Sponge Bed. local Offaster pilula Zone - Inoceramus lingua Zone	WARD, David, J., 19 Oct 1994	Donated
897	NHMUK PI S 10619	1	hand specimen				Aulosoma radiciformis (Phillips, 1835)		Yorkshire; Sewerby Steps, Sewerby, Bridlington, Foreshore exposures to the SE of Sewerby Steps, Sewerby, NE of Bridlington, England, United Kingdom	Cretaceous, Late Cretaceous, Campanian. Flamborough Sponge Bed. local Offaster pilula Zone - Inoceramus lingua Zone	WARD, David, J., 19 Oct 1994	Donated
898	NHMUK PI S 10620	1	hand specimen				Aulosoma radiciformis (Phillips, 1835)		Yorkshire; Sewerby Steps, Sewerby, Bridlington, Foreshore exposures to the SE of Sewerby Steps, Sewerby, NE of Bridlington, England, United Kingdom	Cretaceous, Late Cretaceous, Campanian. Flamborough Sponge Bed. local Offaster pilula Zone - Inoceramus lingua Zone	WARD, David, J., 19 Oct 1994	Donated
899	NHMUK PI S 10621	1	hand specimen				Aulosoma radiciformis (Phillips, 1835)		Yorkshire; Sewerby Steps, Sewerby, Bridlington, Foreshore exposures to the SE of Sewerby Steps, Sewerby, NE of Bridlington, England, United Kingdom	Cretaceous, Late Cretaceous, Campanian. Flamborough Sponge Bed. local Offaster pilula Zone - Inoceramus lingua Zone	WARD, David, J., 19 Oct 1994	Donated
900	NHMUK PI S 10622	1	hand specimen				Aulosoma radiciformis (Phillips, 1835)		Yorkshire; Sewerby Steps, Sewerby, Bridlington, Foreshore exposures to the SE of Sewerby Steps, Sewerby, NE of Bridlington, England, United Kingdom	Cretaceous, Late Cretaceous, Campanian. Flamborough Sponge Bed. local Offaster pilula Zone - Inoceramus lingua Zone	WARD, David, J., 19 Oct 1994	Donated
901	NHMUK PI S 10623	1	hand specimen				Aulosoma radiciformis (Phillips, 1835)		Yorkshire; Sewerby Steps, Sewerby, Bridlington, Foreshore exposures to the SE of Sewerby Steps, Sewerby, NE of Bridlington, England, United Kingdom	Cretaceous, Late Cretaceous, Campanian. Flamborough Sponge Bed. local Offaster pilula Zone - Inoceramus lingua Zone	WARD, David, J., 19 Oct 1994	Donated
902	NHMUK PI S 10624	1	hand specimen				Aulosoma radiciformis (Phillips, 1835)		Yorkshire; Sewerby Steps, Sewerby, Bridlington, Foreshore exposures to the SE of Sewerby Steps, Sewerby, NE of Bridlington, England, United Kingdom	Cretaceous, Late Cretaceous, Campanian. Flamborough Sponge Bed. local Offaster pilula Zone - Inoceramus lingua Zone	WARD, David, J., 19 Oct 1994	Donated
903	NHMUK PI S 10625	1	hand specimen				Aulosoma radiciformis (Phillips, 1835)		Yorkshire; Sewerby Steps, Sewerby, Bridlington, Foreshore exposures to the SE of Sewerby Steps, Sewerby, NE of Bridlington, England, United Kingdom	Cretaceous, Late Cretaceous, Campanian. Flamborough Sponge Bed. local Offaster pilula Zone - Inoceramus lingua Zone	WARD, David, J., 19 Oct 1994	Donated
904	NHMUK PI S 10626	1	hand specimen				Aulosoma radiciformis (Phillips, 1835)		Yorkshire; Sewerby Steps, Sewerby, Bridlington, Foreshore exposures to the SE of Sewerby Steps, Sewerby, NE of Bridlington, England, United Kingdom	Cretaceous, Late Cretaceous, Campanian. Flamborough Sponge Bed. local Offaster pilula Zone - Inoceramus lingua Zone	WARD, David, J., 19 Oct 1994	Donated
905	NHMUK PI S 10627	1	hand specimen				Aulosoma radiciformis (Phillips, 1835)		Yorkshire; Sewerby Steps, Sewerby, Bridlington, Foreshore exposures to the SE of Sewerby Steps, Sewerby, NE of Bridlington, England, United Kingdom	Cretaceous, Late Cretaceous, Campanian. Flamborough Sponge Bed. local Offaster pilula Zone - Inoceramus lingua Zone	WARD, David, J., 19 Oct 1994	Donated
906	NHMUK PI S 10628	1	hand specimen				Aulosoma radiciformis (Phillips, 1835)		Yorkshire; Sewerby Steps, Sewerby, Bridlington, Foreshore exposures to the SE of Sewerby Steps, Sewerby, NE of Bridlington, England, United Kingdom	Cretaceous, Late Cretaceous, Campanian. Flamborough Sponge Bed. local Offaster pilula Zone - Inoceramus lingua Zone	WARD, David, J., 19 Oct 1994	Donated
907	NHMUK PI S 10629	1	hand specimen				Aulosoma radiciformis (Phillips, 1835)		Yorkshire; Sewerby Steps, Sewerby, Bridlington, Foreshore exposures to the SE of Sewerby Steps, Sewerby, NE of Bridlington, England, United Kingdom	Cretaceous, Late Cretaceous, Campanian. Flamborough Sponge Bed. local Offaster pilula Zone - Inoceramus lingua Zone	WARD, David, J., 19 Oct 1994	Donated
908	NHMUK PI S 10630	1	hand specimen				Aulosoma radiciformis (Phillips, 1835)		Yorkshire; Sewerby Steps, Sewerby, Bridlington, Foreshore exposures to the SE of Sewerby Steps, Sewerby, NE of Bridlington, England, United Kingdom	Cretaceous, Late Cretaceous, Campanian. Flamborough Sponge Bed. local Offaster pilula Zone - Inoceramus lingua Zone	WARD, David, J., 19 Oct 1994	Donated
909	NHMUK PI S 10631	1	hand specimen				Aulosoma radiciformis (Phillips, 1835)		Yorkshire; Sewerby Steps, Sewerby, Bridlington, Foreshore exposures to the SE of Sewerby Steps, Sewerby, NE of Bridlington, England, United Kingdom	Cretaceous, Late Cretaceous, Campanian. Flamborough Sponge Bed. local Offaster pilula Zone - Inoceramus lingua Zone	WARD, David, J., 19 Oct 1994	Donated
910	NHMUK PI S 10362	1	hand specimen				Aulosoma radiciformis (Phillips, 1835)		Yorkshire; Sewerby Steps, Sewerby, Bridlington, Foreshore exposures to the SE of Sewerby Steps, Sewerby, NE of Bridlington, England, United Kingdom	Cretaceous, Late Cretaceous, Campanian. Flamborough Sponge Bed. local Offaster pilula Zone - Inoceramus lingua Zone	WARD, David, J., 19 Oct 1994	Donated
911	NHMUK PI S 10633	1	hand specimen				Aulosoma radiciformis (Phillips, 1835)		Yorkshire; Sewerby Steps, Sewerby, Bridlington, Foreshore exposures to the SE of Sewerby Steps, Sewerby, NE of Bridlington, England, United Kingdom	Cretaceous, Late Cretaceous, Campanian. Flamborough Sponge Bed. local Offaster pilula Zone - Inoceramus lingua Zone	WARD, David, J., 19 Oct 1994	Donated
912	NHMUK PI S 10634	1	hand specimen				Aulosoma radiciformis (Phillips, 1835)		Yorkshire; Sewerby Steps, Sewerby, Bridlington, Foreshore exposures to the SE of Sewerby Steps, Sewerby, NE of Bridlington, England, United Kingdom	Cretaceous, Late Cretaceous, Campanian. Flamborough Sponge Bed. local Offaster pilula Zone - Inoceramus lingua Zone	WARD, David, J., 19 Oct 1994	Donated
913	NHMUK PI S 10635	1	hand specimen				Aulosoma radiciformis (Phillips, 1835)		Yorkshire; Sewerby Steps, Sewerby, Bridlington, Foreshore exposures to the SE of Sewerby Steps, Sewerby, NE of Bridlington, England, United Kingdom	Cretaceous, Late Cretaceous, Campanian. Flamborough Sponge Bed. local Offaster pilula Zone - Inoceramus lingua Zone	WARD, David, J., 19 Oct 1994	Donated
914	NHMUK PI S 9585	2	hand specimen				Verruculina Zittel, 1878		Flamborough, Yorkshire, England, United Kingdom	Cretaceous, Chalk Group, Upper Chalk	ROWE, Arthur Walter, Nov 1926	Purchased
915	NHMUK PI S 9586	1	hand specimen				Verruculina Zittel, 1878		Flamborough, Yorkshire, England, United Kingdom	Cretaceous, Chalk Group, Upper Chalk	ROWE, Arthur Walter, Nov 1926	Purchased
916	NHMUK PI P 1218 (1)	1	hand specimen				Verruculina Zittel, 1878		Flamborough, Yorkshire, England, United Kingdom	Cretaceous, Chalk Group, Upper Chalk	History unrecorded
917	NHMUK PI P 1222 (1)	1	hand specimen				Verruculina Zittel, 1878		Flamborough, Yorkshire, England, United Kingdom	Cretaceous, Chalk Group, Upper Chalk	History unrecorded
918	NHMUK PI S 5604	1	hand specimen				Verruculina Zittel, 1878		Dane's Dyke, Sewerby, Bridlington, Yorkshire, England, United Kingdom	Cretaceous, Chalk Group, Upper Chalk, Senonian	WRIGHT, Claud William & WRIGHT, E. V., Jun 1948	Donated
919	NHMUK PI P 1222 (2)	3	hand specimen				Verruculina Zittel, 1878		Flamborough, Yorkshire, England, United Kingdom	Cretaceous, Chalk Group, Upper Chalk	History unrecorded
920	NHMUK PI S 9590	1	hand specimen				Verruculina Zittel, 1878		Flamborough, Yorkshire, England, United Kingdom	Cretaceous, Chalk Group, Upper Chalk, Senonian, A. quadratus zone	ROWE, Arthur Walter, Nov 1926	Purchased
921	NHMUK PI S 9591	1	hand specimen				Verruculina Zittel, 1878		Flamborough, Yorkshire, England, United Kingdom	Cretaceous, Chalk Group, Upper Chalk, Senonian, A. quadratus zone	ROWE, Arthur Walter, Nov 1926	Purchased
922	NHMUK PI S 9592	1	hand specimen				Verruculina Zittel, 1878		Flamborough, Yorkshire, England, United Kingdom	Cretaceous, Chalk Group, Upper Chalk, Senonian, A. quadratus zone	ROWE, Arthur Walter, Nov 1926	Purchased
923	NHMUK PI S 9595	1	hand specimen				Verruculina Zittel, 1878		Flamborough, Yorkshire, England, United Kingdom	Cretaceous, Chalk Group, Upper Chalk, Senonian, A. quadratus zone	ROWE, Arthur Walter, Nov 1926	Purchased
924	NHMUK PI S 9696	1	hand specimen				Verruculina Zittel, 1878		Flamborough, Yorkshire, England, United Kingdom	Cretaceous, Chalk Group, Upper Chalk, Senonian, A. quadratus zone	ROWE, Arthur Walter, Nov 1926	Purchased
925	NHMUK PI S 9597	1	hand specimen				Verruculina Zittel, 1878		Flamborough, Yorkshire, England, United Kingdom	Cretaceous, Chalk Group, Upper Chalk, Senonian, A. quadratus zone	ROWE, Arthur Walter, Nov 1926	Purchased
926	NHMUK PI S 9598	1	hand specimen				Verruculina Zittel, 1878		Flamborough, Yorkshire, England, United Kingdom	Cretaceous, Chalk Group, Upper Chalk, Senonian, A. quadratus zone	ROWE, Arthur Walter, Nov 1926	Purchased
927	NHMUK PI S 9599	1	hand specimen				Verruculina Zittel, 1878		Flamborough, Yorkshire, England, United Kingdom	Cretaceous, Chalk Group, Upper Chalk, Senonian, A. quadratus zone	ROWE, Arthur Walter, Nov 1926	Purchased
928	NHMUK PI S 9580	1	hand specimen				Verruculina Zittel, 1878		Flamborough, Yorkshire, England, United Kingdom	Cretaceous, Chalk Group, Upper Chalk, Senonian, A. quadratus zone	ROWE, Arthur Walter, Nov 1926	Purchased
929	NHMUK PI S 9581	1	hand specimen				Verruculina Zittel, 1878		Flamborough, Yorkshire, England, United Kingdom	Cretaceous, Chalk Group, Upper Chalk, Senonian, A. quadratus zone	ROWE, Arthur Walter, Nov 1926	Purchased
930	NHMUK PI S 9582	1	hand specimen				Verruculina Zittel, 1878		Flamborough, Yorkshire, England, United Kingdom	Cretaceous, Chalk Group, Upper Chalk, Senonian, A. quadratus zone	ROWE, Arthur Walter, Nov 1926	Purchased
931	NHMUK PI S 9593 (1)	1	hand specimen				Verruculina Zittel, 1878		Flamborough, Yorkshire, England, United Kingdom	Cretaceous, Chalk Group, Upper Chalk, Senonian, A. quadratus zone	ROWE, Arthur Walter, Nov 1926	Purchased
932	NHMUK PI S 9594	1	hand specimen				Verruculina Zittel, 1878		Flamborough, Yorkshire, England, United Kingdom	Cretaceous, Chalk Group, Upper Chalk, Senonian, A. quadratus zone	ROWE, Arthur Walter, Nov 1926	Purchased
933	NHMUK PI P 3618	6	hand specimen				Verruculina Zittel, 1878		Flamborough, Yorkshire, England, United Kingdom	Cretaceous, Chalk Group, Upper Chalk	LEE, John Edward Collection, October 1885	Presented
934	NHMUK PI P 3615	1	hand specimen				Verruculina Zittel, 1878		Flamborough, Yorkshire, England, United Kingdom	Cretaceous, Chalk Group, Upper Chalk	LEE, John Edward Collection, October 1885	Presented
935	NHMUK PI P 3616	3	hand specimen				Verruculina Zittel, 1878		Flamborough, Yorkshire, England, United Kingdom	Cretaceous, Chalk Group, Upper Chalk	LEE, John Edward Collection, October 1885	Presented
936	NHMUK PI S 6953	2	hand specimen				Verruculina Zittel, 1878		Alpha Cement Co. pit, Cliffe, Kent, England, United Kingdom	Cretaceous, Chalk Group, Upper Chalk, Senonian, M. coranguinum zone	OWEN, J. E., Oct 1950
937	NHMUK PI P 1218 (2)	3	hand specimen				Verruculina Zittel, 1878		Flamborough, Yorkshire, England, United Kingdom	Cretaceous, Chalk Group, Upper Chalk	History unrecorded
938	NHMUK PI P 1218 (3)	2	hand specimen				Verruculina Zittel, 1878		Flamborough, Yorkshire, England, United Kingdom	Cretaceous, Chalk Group, Upper Chalk	History unrecorded
939	NHMUK PI P 1218 (4)	1	hand specimen				Verruculina Zittel, 1878		Sewerby, Bridlington, Yorkshire, England, United Kingdom	Cretaceous, Chalk Group, Upper Chalk	History unrecorded
940	NHMUK PI P 3613 (1)	2	hand specimen				Amphithelion macrommata (Roemer, 1864)		Flamborough, Yorkshire, England, United Kingdom	Cretaceous, Chalk Group, Upper Chalk	LEE, John Edward Collection, October 1885	Presented
941	NHMUK PI P 3613 (2)	2	hand specimen				Amphithelion macrommata (Roemer, 1864)		Flamborough, Yorkshire, England, United Kingdom	Cretaceous, Chalk Group, Upper Chalk	LEE, John Edward Collection, October 1885	Presented
942	NHMUK PI P 3613 (3)	3	hand specimen				Amphithelion macrommata (Roemer, 1864)		Flamborough, Yorkshire, England, United Kingdom	Cretaceous, Chalk Group, Upper Chalk	LEE, John Edward Collection, October 1885	Presented
943	NHMUK PI P 4128	1	hand specimen				Amphithelion macrommata (Roemer, 1864)		Flamborough, Yorkshire, England, United Kingdom	Cretaceous, Chalk Group, Upper Chalk	HARFORD, Fredrik, Jun 1888	Purchased
944	NHMUK PI P 3899	1	hand specimen				Amphithelion macrommata (Roemer, 1864)		Flamborough, Yorkshire, England, United Kingdom	Cretaceous, Chalk Group, Upper Chalk	History unrecorded
945	NHMUK PI P 1225 (1)	1	hand specimen				Amphithelion macrommata (Roemer, 1864)		Flamborough, Yorkshire, England, United Kingdom	Cretaceous, Chalk Group, Upper Chalk, Senonian	History unrecorded
946	NHMUK PI S 9579	2	hand specimen				Amphithelion macrommata (Roemer, 1864)		Flamborough, Yorkshire, England, United Kingdom	Cretaceous, Chalk Group, Upper Chalk, Senonian, A. quadratus zone	ROWE, Arthur Walter, Nov 1926	Purchased
947	NHMUK PI S 8034	1	hand specimen				Amphithelion macrommata (Roemer, 1864)		Flamborough, Yorkshire, England, United Kingdom	Cretaceous, Chalk Group, Upper Chalk	ROWE, Arthur Walter, Nov 1926	Purchased
948	NHMUK PI S 8035	1	hand specimen				Amphithelion macrommata (Roemer, 1864)		Flamborough, Yorkshire, England, United Kingdom	Cretaceous, Chalk Group, Upper Chalk	ROWE, Arthur Walter, Nov 1926	Purchased
949	NHMUK PI S 4549	1	hand specimen		P 1226	BM(NH) number	Verruculina reussii (M'Coy, 1848)	Figured	Flamborough, Yorkshire, England, United Kingdom	Cretaceous, Chalk Group, Upper Chalk	History unrecorded		Hinde, G.J. 1884. Catalogue of the Fossil Sponges in the Geological Department of the British Museum (Natural History). With descriptions of new and little-known species. BM(NH), London, 248 pp. (on pl. 5, figs. 1, 1a).	Oakley, K.P. 1937. Cretaceous sponges: some biological and geological considerations. Proceedings of the Geologists' Association, 48: 330-348. (on pl. 32, fig. 6).	Sendino, C. 2020. The Natural History Museum Fossil Porifera Collection. Collections: A Journal for Museum and Archives Professionals, 16(4): 363-380. DOI: 10.1177/1550190620964042 (on fig 2 G)
950	NHMUK PI P 4138	1	hand specimen				Amphithelion macrommata (Roemer, 1864)		Flamborough, Yorkshire, England, United Kingdom	Cretaceous, Chalk Group, Upper Chalk	HARFORD, Fredrik, Jun 1888	Purchased
951	NHMUK PI P 1228	1	hand specimen				Amphithelion macrommata (Roemer, 1864)		Flamborough, Yorkshire, England, United Kingdom	Cretaceous, Chalk Group, Upper Chalk	History unrecorded
952	NHMUK PI S 9593 (2)	2	hand specimen				Amphithelion macrommata (Roemer, 1864)		Flamborough, Yorkshire, England, United Kingdom	Cretaceous, Chalk Group, Upper Chalk, Senonian, A. quadratus zone	ROWE, Arthur Walter, Nov 1926	Purchased
953	NHMUK PI P 1225 (2)	1	hand specimen				Amphithelion macrommata (Roemer, 1864)	Figured	Flamborough, Yorkshire, England, United Kingdom	Cretaceous, Chalk Group, Upper Chalk	History unrecorded		Hinde, G.J. 1884. Catalogue of the Fossil Sponges in the Geological Department of the British Museum (Natural History). With descriptions of new and little-known species. BM(NH), London, 248 pp. (on pl. 5, figs. 2, 2a). Charlesworth, E. (1855). On the Mineral Condition and general affinities of the Zoophytes of the Chalk at Flamborough and Bridlington. Proceedings of the Yorkshire Philosophical S…
954	NHMUK PI P 1225 (3)	1	hand specimen				Amphithelion macrommata (Roemer, 1864)		Flamborough, Yorkshire, England, United Kingdom	Cretaceous, Chalk Group, Upper Chalk	History unrecorded
955	NHMUK PI OR 18384	1	hand specimen				Amphithelion macrommata (Roemer, 1864)		Flamborough, Yorkshire, England, United Kingdom	Cretaceous, Chalk Group, Upper Chalk	History unrecorded
956	NHMUK PI P 1226 (1)	2	hand specimen				Amphithelion macrommata (Roemer, 1864)		Flamborough, Yorkshire, England, United Kingdom	Cretaceous, Chalk Group, Upper Chalk	BOWERBANK, James Scott, 1865	Purchased
957	NHMUK PI P 1227 (1)	1	hand specimen				Amphithelion macrommata (Roemer, 1864)		Flamborough, Yorkshire, England, United Kingdom	Cretaceous, Chalk Group, Upper Chalk	BOWERBANK, James Scott, 1865	Purchased
958	NHMUK PI P 1226 (2)	1	hand specimen				Verruculina reussii (M'Coy, 1848)		Flamborough, Yorkshire, England, United Kingdom	Cretaceous, Chalk Group, Upper Chalk	BOWERBANK, James Scott, 1865?	Purchased
959	NHMUK PI P 1227 (2)	1	hand specimen				Amphithelion macrommata (Roemer, 1864)		Flamborough, Yorkshire, England, United Kingdom	Cretaceous, Chalk Group, Upper Chalk	BOWERBANK, James Scott, 1865?	Purchased
960	NHMUK PI P 1226 (3)	1	hand specimen				Amphithelion macrommata (Roemer, 1864)		Flamborough, Yorkshire, England, United Kingdom	Cretaceous, Chalk Group, Upper Chalk	BOWERBANK, James Scott, 1865	Purchased
961	NHMUK PI P 1226 (4)	1	hand specimen				Amphithelion macrommata (Roemer, 1864)		Flamborough, Yorkshire, England, United Kingdom	Cretaceous, Chalk Group, Upper Chalk	BOWERBANK, James Scott, 1865	Purchased
962	NHMUK PI P 1226 (5)	1	hand specimen				Amphithelion macrommata (Roemer, 1864)		Flamborough, Yorkshire, England, United Kingdom	Cretaceous, Chalk Group, Upper Chalk	BOWERBANK, James Scott, 1865	Purchased
963	NHMUK PI P 1226 (6)	1	hand specimen				Amphithelion macrommata (Roemer, 1864)		Flamborough, Yorkshire, England, United Kingdom	Cretaceous, Chalk Group, Upper Chalk	BOWERBANK, James Scott, 1865	Purchased
964	NHMUK PI P 1226 (7)	8	hand specimen				Amphithelion macrommata (Roemer, 1864)		Flamborough, Yorkshire, England, United Kingdom	Cretaceous, Chalk Group, Upper Chalk	BOWERBANK, James Scott, 1865	Purchased
965	NHMUK PI P 1226 (8)	1	hand specimen				Amphithelion macrommata (Roemer, 1864)		Flamborough, Yorkshire, England, United Kingdom	Cretaceous, Chalk Group, Upper Chalk	BOWERBANK, James Scott, 1865	Purchased
966	NHMUK PI P 1226 (9)	1	hand specimen				Amphithelion macrommata (Roemer, 1864)		Flamborough, Yorkshire, England, United Kingdom	Cretaceous, Chalk Group, Upper Chalk	BOWERBANK, James Scott, 1865	Purchased
967	NHMUK PI P 1226 (10)	10	hand specimen				Amphithelion macrommata (Roemer, 1864)		Flamborough, Yorkshire, England, United Kingdom	Cretaceous, Chalk Group, Upper Chalk	BOWERBANK, James Scott, 1865	Purchased
968	NHMUK PI P 1226 (11)	1	hand specimen				Amphithelion macrommata (Roemer, 1864)		Flamborough, Yorkshire, England, United Kingdom	Cretaceous, Chalk Group, Upper Chalk	BOWERBANK, James Scott, 1865	Purchased
969	NHMUK PI P 2276	1	hand specimen				Amphithelion macrommata (Roemer, 1864)		Flamborough, Yorkshire, England, United Kingdom	Cretaceous, Chalk Group, Upper Chalk	BOWERBANK, James Scott, 1865	Purchased
970	NHMUK PI P 1226 (12)	1	hand specimen				Amphithelion macrommata (Roemer, 1864)		Flamborough, Yorkshire, England, United Kingdom	Cretaceous, Chalk Group, Upper Chalk	BOWERBANK, James Scott, 1865	Purchased
971	NHMUK PI P 1223 (1)	1	hand specimen				Amphithelion dissipatum (Schrammen, 1924)	Figured	Flamborough, Yorkshire, England, United Kingdom	Cretaceous, Chalk Group, Upper Chalk	History unrecorded		Hinde, G.J. 1884. Catalogue of the Fossil Sponges in the Geological Department of the British Museum (Natural History). With descriptions of new and little-known species. BM(NH), London, 248 pp. (on pl. 3, figs. 3, 3a, as Verruculina miliaris Reuss)
972	NHMUK PI P 1223 (2)	6	hand specimen				Amphithelion dissipatum (Schrammen, 1924)		Flamborough, Yorkshire, England, United Kingdom	Cretaceous, Chalk Group, Upper Chalk	History unrecorded
973	NHMUK PI P 1223 (3)	1	hand specimen				Amphithelion dissipatum (Schrammen, 1924)		Flamborough, Yorkshire, England, United Kingdom	Cretaceous, Chalk Group, Upper Chalk	History unrecorded
974	NHMUK PI P 1223 (4)	4	hand specimen				Amphithelion dissipatum (Schrammen, 1924)		Flamborough, Yorkshire, England, United Kingdom	Cretaceous, Chalk Group, Upper Chalk	History unrecorded
975	NHMUK PI P 1223 (5)	1	hand specimen				Amphithelion dissipatum (Schrammen, 1924)		Flamborough, Yorkshire, England, United Kingdom	Cretaceous, Chalk Group, Upper Chalk	History unrecorded
976	NHMUK PI P 1223 (6)	2	hand specimen				Amphithelion dissipatum (Schrammen, 1924)		Flamborough, Yorkshire, England, United Kingdom	Cretaceous, Chalk Group, Upper Chalk	History unrecorded
977	NHMUK PI S 7176	2	hand specimen				Amphithelion dissipatum (Schrammen, 1924)		Bridlington, Yorkshire, England, United Kingdom	Cretaceous, Chalk Group, Upper Chalk	Geol. Dept. Uni. Of Birmingham, Jan, 1952	Donated
978	NHMUK PI P 2274	1	hand specimen				Amphithelion dissipatum (Schrammen, 1924)		Flamborough, Yorkshire, England, United Kingdom	Cretaceous, Chalk Group, Upper Chalk	History unrecorded
979	NHMUK PI S 9820	2	hand specimen		P 1219	BM(NH) number	Amphithelion dissipatum (Schrammen, 1924)		Flamborough, Yorkshire, England, United Kingdom	Cretaceous, Chalk Group, Upper Chalk	History unrecorded
980	NHMUK PI P 1223 (7)	2	hand specimen				Amphithelion dissipatum (Schrammen, 1924)		Flamborough, Yorkshire, England, United Kingdom	Cretaceous, Chalk Group, Upper Chalk	History unrecorded
981	NHMUK PI S 8032	1	hand specimen				Amphithelion dissipatum (Schrammen, 1924)		Flamborough, Yorkshire, England, United Kingdom	Cretaceous, Chalk Group, Upper Chalk	History unrecorded
982	NHMUK PI S 9570	1	hand specimen				Amphithelion dissipatum (Schrammen, 1924)		Sewerby, Bridlington, Yorkshire, England, United Kingdom	Cretaceous, Chalk Group, Upper Chalk	ROWE, Arthur Walter, Nov 1926	Purchased
983	NHMUK PI OR 55095	1	hand specimen				Amphithelion dissipatum (Schrammen, 1924)		Flamborough, Yorkshire, England, United Kingdom	Cretaceous, Chalk Group, Upper Chalk	History unrecorded
984	NHMUK PI P 3577 (1)	1	hand specimen				Amphithelion dissipatum (Schrammen, 1924)		Flamborough, Yorkshire, England, United Kingdom	Cretaceous, Chalk Group, Upper Chalk	LEE, John Edward Collection, October 1885	Presented
985	NHMUK PI S 9851	1	hand specimen				Amphithelion dissipatum (Schrammen, 1924)		Flamborough, Yorkshire, England, United Kingdom	Cretaceous, Chalk Group, Upper Chalk	ROWE, Arthur Walter, Nov 1926	Purchased
986	NHMUK PI P 1223 (8)	2	hand specimen				Amphithelion dissipatum (Schrammen, 1924)		Flamborough, Yorkshire, England, United Kingdom	Cretaceous, Chalk Group, Upper Chalk	History unrecorded
987	NHMUK PI P 1219 (1)	1	hand specimen				Verruculina (Amphichondrium) convoluta Quenstedt, 1878	Figured	Flamborough, Yorkshire, England, United Kingdom	Cretaceous, Chalk Group, Upper Chalk	History unrecorded		Hinde, G.J. 1884. Catalogue of the Fossil Sponges in the Geological Department of the British Museum (Natural History). With descriptions of new and little-known species. BM(NH), London, 248 pp. (on pl. 3, figs. 1a-d, as Verruculina)
988	NHMUK PI P 1219 (2)	8	hand specimen				Verruculina (Amphichondrium) convoluta Quenstedt, 1878		Flamborough, Yorkshire, England, United Kingdom	Cretaceous, Chalk Group, Upper Chalk	History unrecorded
989	NHMUK PI P 3577 (2)	1	hand specimen				Verruculina (Amphichondrium) convoluta Quenstedt, 1878		Flamborough, Yorkshire, England, United Kingdom	Cretaceous, Chalk Group, Upper Chalk	LEE, John Edward Collection, October 1885	Presented
990	NHMUK PI S 9821	1	hand specimen				Verruculina (Amphichondrium) convoluta Quenstedt, 1878		Flamborough, Yorkshire, England, United Kingdom	Cretaceous, Chalk Group, Upper Chalk	History unrecorded
991	NHMUK PI P 1218 (5)	1	hand specimen				Verruculina plicatum (Hinde, 1884)	Figured	Flamborough, Yorkshire, England, United Kingdom	Cretaceous, Chalk Group, Upper Chalk	History unrecorded		Hinde, G.J. 1884. Catalogue of the Fossil Sponges in the Geological Department of the British Museum (Natural History). With descriptions of new and little-known species. BM(NH), London, 248 pp. (on pl. 4, figs. 2, 2a-d)
992	NHMUK PI P 1218 (6)	1	hand specimen				Verruculina plicatum (Hinde, 1884)		Flamborough, Yorkshire, England, United Kingdom	Cretaceous, Chalk Group, Upper Chalk	History unrecorded
993	NHMUK PI P 1218 (7)	5	hand specimen				Verruculina plicatum (Hinde, 1884)		Flamborough, Yorkshire, England, United Kingdom	Cretaceous, Chalk Group, Upper Chalk	History unrecorded
994	NHMUK PI S 9589	1	hand specimen				Verruculina Schrammen, 1924		Flamborough, Yorkshire, England, United Kingdom	Cretaceous, Chalk Group, Upper Chalk, Senonian, A. quadratus zone	ROWE, Arthur Walter, Nov 1926	Purchased
995	NHMUK PI P 1218 (8)	1	hand specimen				Verruculina plicatum (Hinde, 1884)		Flamborough, Yorkshire, England, United Kingdom	Cretaceous, Chalk Group, Upper Chalk	History unrecorded
996	NHMUK PI P 1218 (9)	1	hand specimen				Verruculina plicatum (Hinde, 1884)		Flamborough, Yorkshire, England, United Kingdom	Cretaceous, Chalk Group, Upper Chalk	History unrecorded
997	NHMUK PI P 1218 (10)	2	hand specimen				Verruculina plicatum (Hinde, 1884)		Flamborough, Yorkshire, England, United Kingdom	Cretaceous, Chalk Group, Upper Chalk	History unrecorded
998	NHMUK PI P 1218 (11)	1	hand specimen				Verruculina plicatum (Hinde, 1884)		Flamborough, Yorkshire, England, United Kingdom	Cretaceous, Chalk Group, Upper Chalk	History unrecorded
999	NHMUK PI S 9852	1	hand specimen				Verruculina plicatum (Hinde, 1884)		Flamborough, Yorkshire, England, United Kingdom	Cretaceous, Chalk Group, Upper Chalk, Senonian, A. quadratus zone	ROWE, Arthur Walter, Nov 1926	Purchased
1000	NHMUK PI P 2275	1	hand specimen				Verruculina plicatum (Hinde, 1884)		Flamborough, Yorkshire, England, United Kingdom	Cretaceous, Chalk Group, Upper Chalk	Zoology Department, 1884	Transferred
1001	NHMUK PI P 1218 (12)	1	hand specimen				Verruculina plicatum (Hinde, 1884)		Flamborough, Yorkshire, England, United Kingdom	Cretaceous, Chalk Group, Upper Chalk	History unrecorded
1002	NHMUK PI P 1216 (1)	1	hand specimen				Verruculina astraea (Hinde, 1884)	Figured	Flamborough, Yorkshire, England, United Kingdom	Cretaceous, Chalk Group, Upper Chalk	History unrecorded		Hinde, G.J. 1884. Catalogue of the Fossil Sponges in the Geological Department of the British Museum (Natural History). With descriptions of new and little-known species. BM(NH), London, 248 pp. (on pl. 3, figs. 5, 5a)
1003	NHMUK PI P 1216 (2)	1	hand specimen				Verruculina astraea (Hinde, 1884)		Flamborough, Yorkshire, England, United Kingdom	Cretaceous, Chalk Group, Upper Chalk	History unrecorded
1004	NHMUK PI P 1216 (3)	8	hand specimen				Verruculina astraea (Hinde, 1884)		Flamborough, Yorkshire, England, United Kingdom	Cretaceous, Chalk Group, Upper Chalk	History unrecorded
1005	NHMUK PI P 1216 (4)	2	hand specimen				Verruculina astraea (Hinde, 1884)		Flamborough, Yorkshire, England, United Kingdom	Cretaceous, Chalk Group, Upper Chalk	History unrecorded
1006	NHMUK PI P 1222 (3)	1	hand specimen				Manon tenue (Roemer, 1840)	Figured	Flamborough, Yorkshire, England, United Kingdom	Cretaceous, Chalk Group, Upper Chalk	History unrecorded		Hinde, G.J. 1884. Catalogue of the Fossil Sponges in the Geological Department of the British Museum (Natural History). With descriptions of new and little-known species. BM(NH), London, 248 pp. (on pl.3, figs. 2, 2a)
1007	NHMUK PI P 1222 (4)	1	hand specimen				Manon tenue (Roemer, 1840)		Flamborough, Yorkshire, England, United Kingdom	Cretaceous, Chalk Group, Upper Chalk	History unrecorded
1008	NHMUK PI P 1222 (5)	1	hand specimen				Manon tenue (Roemer, 1840)		Flamborough, Yorkshire, England, United Kingdom	Cretaceous, Chalk Group, Upper Chalk	History unrecorded
1009	NHMUK PI P 3617	1	hand specimen				Manon tenue (Roemer, 1840)		Flamborough, Yorkshire, England, United Kingdom	Cretaceous, Chalk Group, Upper Chalk	LEE, John Edward Collection, October 1885	Presented
1010	NHMUK PI P 2278	1	hand specimen				Manon tenue (Roemer, 1840)		Flamborough, Yorkshire, England, United Kingdom	Cretaceous, Chalk Group, Upper Chalk	Zoology Department, 1884	Transferred
1011	NHMUK PI P 3614	3	hand specimen				Manon tenue (Roemer, 1840)		Flamborough, Yorkshire, England, United Kingdom	Cretaceous, Chalk Group, Upper Chalk	LEE, John Edward Collection, October 1885	Presented
1012	NHMUK PI P 3565 (1)	3	hand specimen				Laosciadia plana (Phillips, 1835)		Flamborough, Yorkshire, England, United Kingdom	Cretaceous, Chalk Group, Upper Chalk	LEE, John Edward Collection, October 1885	Presented
1013	NHMUK PI P 3565 (2)	2	hand specimen				Laosciadia plana (Phillips, 1835)		Flamborough, Yorkshire, England, United Kingdom	Cretaceous, Chalk Group, Upper Chalk	LEE, John Edward Collection, October 1885	Presented
1014	NHMUK PI P 3565 (3)	1	hand specimen				Laosciadia plana (Phillips, 1835)		Flamborough, Yorkshire, England, United Kingdom	Cretaceous, Chalk Group, Upper Chalk	LEE, John Edward Collection, October 1885	Presented
1015	NHMUK PI P 3565 (4)	2	hand specimen				Laosciadia plana (Phillips, 1835)		Flamborough, Yorkshire, England, United Kingdom	Cretaceous, Chalk Group, Upper Chalk	LEE, John Edward Collection, October 1885	Presented
1016	NHMUK PI P 3565 (5)	2	hand specimen				Laosciadia plana (Phillips, 1835)		Flamborough, Yorkshire, England, United Kingdom	Cretaceous, Chalk Group, Upper Chalk	LEE, John Edward Collection, October 1885	Presented
1017	NHMUK PI P 3565 (6)	20	hand specimen				Laosciadia plana (Phillips, 1835)		Flamborough, Yorkshire, England, United Kingdom	Cretaceous, Chalk Group, Upper Chalk	LEE, John Edward Collection, October 1885	Presented
1018	NHMUK PI P 3565 (7)	2	hand specimen				Laosciadia plana (Phillips, 1835)		Flamborough, Yorkshire, England, United Kingdom	Cretaceous, Chalk Group, Upper Chalk	LEE, John Edward Collection, October 1885	Presented
1019	NHMUK PI P 3565 (8)	4	hand specimen				Laosciadia plana (Phillips, 1835)		Flamborough, Yorkshire, England, United Kingdom	Cretaceous, Chalk Group, Upper Chalk	LEE, John Edward Collection, October 1885	Presented
1020	NHMUK PI P 3565 (9)	4	hand specimen				Laosciadia plana (Phillips, 1835)		Flamborough, Yorkshire, England, United Kingdom	Cretaceous, Chalk Group, Upper Chalk	LEE, John Edward Collection, October 1885	Presented
1021	NHMUK PI P 3565 (10)	2	hand specimen				Laosciadia plana (Phillips, 1835)		Flamborough, Yorkshire, England, United Kingdom	Cretaceous, Chalk Group, Upper Chalk	LEE, John Edward Collection, October 1885	Presented
1022	NHMUK PI P 3565 (11)	1	hand specimen				Laosciadia plana (Phillips, 1835)	Figured	Flamborough, Yorkshire, England, United Kingdom	Cretaceous, Chalk Group, Upper Chalk	LEE, John Edward Collection, October 1885	Presented	Walker, C. & Ward, D. 1992. Fossils (Eyewitness Handbook). Dorling Kindersley, London, 320 pp. (on p. 33)
1023	NHMUK PI S 8004	1	hand specimen				Laosciadia plana (Phillips, 1835)		Flamborough, Yorkshire, England, United Kingdom	Cretaceous, Chalk Group, Upper Chalk	ROWE, Arthur Walter, Nov 1926	Purchased
1024	NHMUK PI S 8026	1	hand specimen				Laosciadia plana (Phillips, 1835)		Flamborough, Yorkshire, England, United Kingdom	Cretaceous, Chalk Group, Upper Chalk	ROWE, Arthur Walter, Nov 1926	Purchased
1025	NHMUK PI S 8027	1	hand specimen				Laosciadia plana (Phillips, 1835)		Flamborough, Yorkshire, England, United Kingdom	Cretaceous, Chalk Group, Upper Chalk	ROWE, Arthur Walter, Nov 1926	Purchased
1026	NHMUK PI S 8028	1	hand specimen				Laosciadia plana (Phillips, 1835)		Flamborough, Yorkshire, England, United Kingdom	Cretaceous, Chalk Group, Upper Chalk	ROWE, Arthur Walter, Nov 1926	Purchased
1027	NHMUK PI S 8031	1	hand specimen				Laosciadia plana (Phillips, 1835)		Flamborough, Yorkshire, England, United Kingdom	Cretaceous, Chalk Group, Upper Chalk	ROWE, Arthur Walter, Nov 1926	Purchased
1028	NHMUK PI S 9990	1	hand specimen				Laosciadia plana (Phillips, 1835)		Sewerby-Dane's Dyke, Yorkshire, England United Kingdom	Cretaceous, Chalk Group, Upper Chalk, Senonian, A. quadratus zone	WRIGHT, Claud William, Collection [1933]	Presented
1029	NHMUK PI S 4548	2	hand specimen				Laosciadia plana (Phillips, 1835)	Figured	Flamborough, Yorkshire, England, United Kingdom	Cretaceous, Chalk Group, Upper Chalk	History unrecorded		Oakley, K.P. 1937. Cretaceous sponges: some biological and geological considerations. Proceedings of the Geologists' Association, 48: 330-348. (on pl. 32, fig. 5)
1030	NHMUK PI S 8038 (1)	1	hand specimen				Laosciadia Pomel, 1872		Bessingby, Bridlington, Yorkshire, England United Kingdom	Cretaceous, Chalk Group, Upper Chalk, Senonian, A. quadratus zone	ROWE, Arthur Walter, Nov 1926	Purchased
1031	NHMUK PI S 10636	1	hand specimen				Laosciadia Pomel, 1872		Yorkshire, England, United Kingdom	Cretaceous, Chalk Group, Upper Chalk	History unrecorded
1032	NHMUK PI S 9562	3	hand specimen				Laosciadia plana (Phillips, 1835)		Sewerby, Bridlington, Yorkshire, England, United Kingdom	Cretaceous, Chalk Group, Upper Chalk, Senonian, A. quadratus zone	ROWE, Arthur Walter, Nov 1926	Purchased
1033	NHMUK PI S 9559	2	hand specimen				Laosciadia plana (Phillips, 1835)		Sewerby, Bridlington, Yorkshire, England, United Kingdom	Cretaceous, Chalk Group, Upper Chalk, Senonian, A. quadratus zone	ROWE, Arthur Walter, Nov 1926	Purchased
1034	NHMUK PI OR 55228 (2)	2	hand specimen				Laosciadia plana (Phillips, 1835)		Flamborough, Yorkshire, England, United Kingdom	Cretaceous, Chalk Group, Upper Chalk	CAPRON, Bt. H., 1879	Purchased
1035	NHMUK PI OR 55219 (1)	1	hand specimen				Laosciadia plana (Phillips, 1835)	Figured	Flamborough, Yorkshire, England, United Kingdom	Cretaceous, Chalk Group, Upper Chalk	History unrecorded		Hinde, G.J. 1884. Catalogue of the Fossil Sponges in the Geological Department of the British Museum (Natural History). With descriptions of new and little-known species. BM(NH), London, 248 pp. (onp.31, pl.2, fig. 4)
1036	NHMUK PI S 9988	1	hand specimen		535	Wright Collection number	Laosciadia plana (Phillips, 1835)		Sewerby-Dane's Dyke, Yorkshire, England United Kingdom	Cretaceous, Chalk Group, Upper Chalk, Senonian, A. quadratus zone	WRIGHT, Claud William, Collection [1933]	Presented
1037	NHMUK PI S 9989	1	hand specimen		534	Wright Collection number	Laosciadia plana (Phillips, 1835)		Sewerby-Dane's Dyke, Yorkshire, England United Kingdom	Cretaceous, Chalk Group, Upper Chalk, Senonian, A. quadratus zone	WRIGHT, Claud William, Collection [1933]	Presented
1038	NHMUK PI S 9564	1	hand specimen				Laosciadia plana (Phillips, 1835)		Sewerby, Bridlington, Yorkshire, England, United Kingdom	Cretaceous, Chalk Group, Upper Chalk, Senonian, A. quadratus zone	ROWE, Arthur Walter, Nov 1926	Purchased
1039	NHMUK PI S 9563	1	hand specimen				Laosciadia plana (Phillips, 1835)		Sewerby, Bridlington, Yorkshire, England, United Kingdom	Cretaceous, Chalk Group, Upper Chalk, Senonian, A. quadratus zone	ROWE, Arthur Walter, Nov 1926	Purchased
1040	NHMUK PI S 9560	3	hand specimen				Laosciadia plana (Phillips, 1835)		Sewerby, Bridlington, Yorkshire, England, United Kingdom	Cretaceous, Chalk Group, Upper Chalk, Senonian, A. quadratus zone	ROWE, Arthur Walter, Nov 1926	Purchased
1041	NHMUK PI S 5603	1	hand specimen				Laosciadia plana (Phillips, 1835)	Figured	Sewerby-Dane's Dyke, Yorkshire, England United Kingdom	Cretaceous, Chalk Group, Upper Chalk, Senonian, A. quadratus zone	WRIGHT, Claud William & WRIGHT, E. V., Jun 1948	Donated	Donovan, S.K. 2000. Fossils explained 31: Sponges 1. Geology Today, 16: 194-198. (on fig.2, D, E)
1042	NHMUK PI OR 55164	1	hand specimen				Laosciadia plana (Phillips, 1835)		Flamborough, Yorkshire, England, United Kingdom	Cretaceous, Chalk Group, Upper Chalk	History unrecorded
1043	NHMUK PI S 9578	1	hand specimen				Laosciadia plana (Phillips, 1835)		Flamborough, Yorkshire, England, United Kingdom	Cretaceous, Chalk Group, Upper Chalk, Senonian, A. quadratus zone	ROWE, Arthur Walter, Nov 1926	Purchased
1044	NHMUK PI OR 55221	6	hand specimen				Laosciadia plana (Phillips, 1835)		Flamborough, Yorkshire, England, United Kingdom	Cretaceous, Chalk Group, Upper Chalk	BOWERBANK, James Scott, 1865	Purchased
1045	NHMUK PI S 8465	0	hand specimen				Laosciadia plana (Phillips, 1835)	Figured	Flamborough, Yorkshire, England, United Kingdom	Cretaceous, Chalk Group, Upper Chalk	History unrecorded		Castell, C.P., Cox, L.R. & Muir-Wood, H.M. 1962. British Mesozoic Fossils. British Museum Natural History. London, 205 pp (on pl. 49: fig. 2)
1046	NHMUK PI P 1165 (1)	1	hand specimen				Laosciadia plana (Phillips, 1835)	Figured	Flamborough, Yorkshire, England, United Kingdom	Cretaceous, Chalk Group, Upper Chalk	History unrecorded		Hinde, G.J. 1884. Catalogue of the Fossil Sponges in the Geological Department of the British Museum (Natural History). With descriptions of new and little-known species. BM(NH), London, 248 pp. (on pl.2, figs. 2-3)
1047	NHMUK PI P 3119	1	hand specimen		55228	BM(NH) number	Laosciadia plana (Phillips, 1835)		Flamborough, Yorkshire, England, United Kingdom	Cretaceous, Chalk Group, Upper Chalk	CAPRON, Bt. H., 1879	Purchased
1048	NHMUK PI OR 55220	1	hand specimen				Laosciadia plana (Phillips, 1835)		Flamborough, Yorkshire, England, United Kingdom	Cretaceous, Chalk Group, Upper Chalk	BOWERBANK, James Scott, 1865	Purchased
1049	NHMUK PI P 1167 (1)	1	hand specimen				Laosciadia plana (Phillips, 1835)		Flamborough, Yorkshire, England, United Kingdom	Cretaceous, Chalk Group, Upper Chalk	BOWERBANK, James Scott, 1865	Purchased
1050	NHMUK PI P 1166	4	hand specimen				Laosciadia plana (Phillips, 1835)		Flamborough, Yorkshire, England, United Kingdom	Cretaceous, Chalk Group, Upper Chalk	History unrecorded
1051	NHMUK PI S 8016	1	hand specimen				Laosciadia plana (Phillips, 1835)		Flamborough, Yorkshire, England, United Kingdom	Cretaceous, Chalk Group, Upper Chalk	ROWE, Arthur Walter, Nov 1926	Purchased
1052	NHMUK PI P 1167 (3)	1	hand specimen				Laosciadia plana (Phillips, 1835)		Flamborough, Yorkshire, England, United Kingdom	Cretaceous, Chalk Group, Upper Chalk	BOWERBANK, James Scott, 1865	Purchased
1053	NHMUK PI S 9991	1	hand specimen				Laosciadia plana (Phillips, 1835)		Sewerby-Dane's Dyke, Yorkshire, England United Kingdom	Cretaceous, Chalk Group, Upper Chalk, Senonian, A. quadratus zone	WRIGHT, Claud William, Collection [1933]	Presented
1054	NHMUK PI S 9992	1	hand specimen				Laosciadia plana (Phillips, 1835)		Sewerby-Dane's Dyke, Yorkshire, England United Kingdom	Cretaceous, Chalk Group, Upper Chalk, Senonian, A. quadratus zone	WRIGHT, Claud William, Collection [1933]	Presented
1055	NHMUK PI S 9993	1	hand specimen				Laosciadia plana (Phillips, 1835)		Sewerby-Dane's Dyke, Yorkshire, England United Kingdom	Cretaceous, Chalk Group, Upper Chalk, Senonian, A. quadratus zone	WRIGHT, Claud William, Collection [1933]	Presented
1056	NHMUK PI S 9994	1	hand specimen				Laosciadia plana (Phillips, 1835)		Sewerby-Dane's Dyke, Yorkshire, England United Kingdom	Cretaceous, Chalk Group, Upper Chalk, Senonian, A. quadratus zone	WRIGHT, Claud William, Collection [1933]	Presented
1057	NHMUK PI S 1626	1	hand specimen				Laosciadia plana (Phillips, 1835)		Flamborough, Yorkshire, England, United Kingdom	Cretaceous, Chalk Group, Upper Chalk	EGERTON Collection, 1882
1058	NHMUK PI P 4151	1	hand specimen				Laosciadia plana (Phillips, 1835)		Flamborough, Yorkshire, England, United Kingdom	Cretaceous, Chalk Group, Upper Chalk	HARFORD, Frederick	Purchased
1059	NHMUK PI P 1167 (2)	1	hand specimen				Laosciadia plana (Phillips, 1835)		Flamborough, Yorkshire, England, United Kingdom	Cretaceous, Chalk Group, Upper Chalk	BOWERBANK, James Scott, 1865	Purchased
1060	NHMUK PI S 10637	1	hand specimen				Laosciadia plana (Phillips, 1835)		Yorkshire; Sewerby Steps, Sewerby, Bridlington, Foreshore exposures to the SE of Sewerby Steps, Sewerby, NE of Bridlington, England, United Kingdom	Cretaceous, Late Cretaceous, Campanian. Flamborough Sponge Bed. local Offaster pilula Zone - Inoceramus lingua Zone	WARD, David, J., 19 Oct 1994	Donated
1061	NHMUK PI S 10638	1	hand specimen				Laosciadia plana (Phillips, 1835)		Yorkshire; Sewerby Steps, Sewerby, Bridlington, Foreshore exposures to the SE of Sewerby Steps, Sewerby, NE of Bridlington, England, United Kingdom	Cretaceous, Late Cretaceous, Campanian. Flamborough Sponge Bed. local Offaster pilula Zone - Inoceramus lingua Zone	WARD, David, J., 19 Oct 1994	Donated
1062	NHMUK PI S 10639	1	hand specimen				Laosciadia plana (Phillips, 1835)		Yorkshire; Sewerby Steps, Sewerby, Bridlington, Foreshore exposures to the SE of Sewerby Steps, Sewerby, NE of Bridlington, England, United Kingdom	Cretaceous, Late Cretaceous, Campanian. Flamborough Sponge Bed. local Offaster pilula Zone - Inoceramus lingua Zone	WARD, David, J., 19 Oct 1994	Donated
1063	NHMUK PI S 10640	1	hand specimen				Laosciadia plana (Phillips, 1835)		Yorkshire; Sewerby Steps, Sewerby, Bridlington, Foreshore exposures to the SE of Sewerby Steps, Sewerby, NE of Bridlington, England, United Kingdom	Cretaceous, Late Cretaceous, Campanian. Flamborough Sponge Bed. local Offaster pilula Zone - Inoceramus lingua Zone	WARD, David, J., 19 Oct 1994	Donated
1064	NHMUK PI S 10642	1	hand specimen				Laosciadia plana (Phillips, 1835)		Yorkshire; Sewerby Steps, Sewerby, Bridlington, Foreshore exposures to the SE of Sewerby Steps, Sewerby, NE of Bridlington, England, United Kingdom	Cretaceous, Late Cretaceous, Campanian. Flamborough Sponge Bed. local Offaster pilula Zone - Inoceramus lingua Zone	WARD, David, J., 19 Oct 1994	Donated
1065	NHMUK PI S 10643	1	hand specimen				Laosciadia plana (Phillips, 1835)		Yorkshire; Sewerby Steps, Sewerby, Bridlington, Foreshore exposures to the SE of Sewerby Steps, Sewerby, NE of Bridlington, England, United Kingdom	Cretaceous, Late Cretaceous, Campanian. Flamborough Sponge Bed. local Offaster pilula Zone - Inoceramus lingua Zone	WARD, David, J., 19 Oct 1994	Donated
1066	NHMUK PI S 10644	1	hand specimen				Laosciadia plana (Phillips, 1835)		Yorkshire; Sewerby Steps, Sewerby, Bridlington, Foreshore exposures to the SE of Sewerby Steps, Sewerby, NE of Bridlington, England, United Kingdom	Cretaceous, Late Cretaceous, Campanian. Flamborough Sponge Bed. local Offaster pilula Zone - Inoceramus lingua Zone	WARD, David, J., 19 Oct 1994	Donated
1067	NHMUK PI S 10645	1	hand specimen				Laosciadia plana (Phillips, 1835)		Yorkshire; Sewerby Steps, Sewerby, Bridlington, Foreshore exposures to the SE of Sewerby Steps, Sewerby, NE of Bridlington, England, United Kingdom	Cretaceous, Late Cretaceous, Campanian. Flamborough Sponge Bed. local Offaster pilula Zone - Inoceramus lingua Zone	WARD, David, J., 19 Oct 1994	Donated
1068	NHMUK PI S 10646	1	hand specimen				Laosciadia plana (Phillips, 1835)		Yorkshire; Sewerby Steps, Sewerby, Bridlington, Foreshore exposures to the SE of Sewerby Steps, Sewerby, NE of Bridlington, England, United Kingdom	Cretaceous, Late Cretaceous, Campanian. Flamborough Sponge Bed. local Offaster pilula Zone - Inoceramus lingua Zone	WARD, David, J., 19 Oct 1994	Donated
1069	NHMUK PI S 10647	1	hand specimen				Laosciadia plana (Phillips, 1835)		Yorkshire; Sewerby Steps, Sewerby, Bridlington, Foreshore exposures to the SE of Sewerby Steps, Sewerby, NE of Bridlington, England, United Kingdom	Cretaceous, Late Cretaceous, Campanian. Flamborough Sponge Bed. local Offaster pilula Zone - Inoceramus lingua Zone	WARD, David, J., 19 Oct 1994	Donated
1070	NHMUK PI S 10648	1	hand specimen				Laosciadia plana (Phillips, 1835)		Yorkshire; Sewerby Steps, Sewerby, Bridlington, Foreshore exposures to the SE of Sewerby Steps, Sewerby, NE of Bridlington, England, United Kingdom	Cretaceous, Late Cretaceous, Campanian. Flamborough Sponge Bed. local Offaster pilula Zone - Inoceramus lingua Zone	WARD, David, J., 19 Oct 1994	Donated
1071	NHMUK PI S 10649	1	hand specimen				Laosciadia plana (Phillips, 1835)		Yorkshire; Sewerby Steps, Sewerby, Bridlington, Foreshore exposures to the SE of Sewerby Steps, Sewerby, NE of Bridlington, England, United Kingdom	Cretaceous, Late Cretaceous, Campanian. Flamborough Sponge Bed. local Offaster pilula Zone - Inoceramus lingua Zone	WARD, David, J., 19 Oct 1994	Donated
1072	NHMUK PI S 10650	1	hand specimen				Laosciadia plana (Phillips, 1835)		Yorkshire; Sewerby Steps, Sewerby, Bridlington, Foreshore exposures to the SE of Sewerby Steps, Sewerby, NE of Bridlington, England, United Kingdom	Cretaceous, Late Cretaceous, Campanian. Flamborough Sponge Bed. local Offaster pilula Zone - Inoceramus lingua Zone	WARD, David, J., 19 Oct 1994	Donated
1073	NHMUK PI S 10651	1	hand specimen				Laosciadia plana (Phillips, 1835)		Yorkshire; Sewerby Steps, Sewerby, Bridlington, Foreshore exposures to the SE of Sewerby Steps, Sewerby, NE of Bridlington, England, United Kingdom	Cretaceous, Late Cretaceous, Campanian. Flamborough Sponge Bed. local Offaster pilula Zone - Inoceramus lingua Zone	WARD, David, J., 19 Oct 1994	Donated
1074	NHMUK PI S 10652	1	hand specimen				Laosciadia plana (Phillips, 1835)		Yorkshire; Sewerby Steps, Sewerby, Bridlington, Foreshore exposures to the SE of Sewerby Steps, Sewerby, NE of Bridlington, England, United Kingdom	Cretaceous, Late Cretaceous, Campanian. Flamborough Sponge Bed. local Offaster pilula Zone - Inoceramus lingua Zone	WARD, David, J., 19 Oct 1994	Donated
1075	NHMUK PI S 10653	1	hand specimen				Laosciadia plana (Phillips, 1835)		Yorkshire; Sewerby Steps, Sewerby, Bridlington, Foreshore exposures to the SE of Sewerby Steps, Sewerby, NE of Bridlington, England, United Kingdom	Cretaceous, Late Cretaceous, Campanian. Flamborough Sponge Bed. local Offaster pilula Zone - Inoceramus lingua Zone	WARD, David, J., 19 Oct 1994	Donated
1076	NHMUK PI S 10654	1	hand specimen				Laosciadia plana (Phillips, 1835)		Yorkshire; Sewerby Steps, Sewerby, Bridlington, Foreshore exposures to the SE of Sewerby Steps, Sewerby, NE of Bridlington, England, United Kingdom	Cretaceous, Late Cretaceous, Campanian. Flamborough Sponge Bed. local Offaster pilula Zone - Inoceramus lingua Zone	WARD, David, J., 19 Oct 1994	Donated
1077	NHMUK PI S 10655	1	hand specimen				Laosciadia plana (Phillips, 1835)		Yorkshire; Sewerby Steps, Sewerby, Bridlington, Foreshore exposures to the SE of Sewerby Steps, Sewerby, NE of Bridlington, England, United Kingdom	Cretaceous, Late Cretaceous, Campanian. Flamborough Sponge Bed. local Offaster pilula Zone - Inoceramus lingua Zone	WARD, David, J., 19 Oct 1994	Donated
1078	NHMUK PI S 10656	1	hand specimen				Laosciadia plana (Phillips, 1835)		Yorkshire; Sewerby Steps, Sewerby, Bridlington, Foreshore exposures to the SE of Sewerby Steps, Sewerby, NE of Bridlington, England, United Kingdom	Cretaceous, Late Cretaceous, Campanian. Flamborough Sponge Bed. local Offaster pilula Zone - Inoceramus lingua Zone	WARD, David, J., 19 Oct 1994	Donated
1079	NHMUK PI S 10657	1	hand specimen				Laosciadia plana (Phillips, 1835)		Yorkshire; Sewerby Steps, Sewerby, Bridlington, Foreshore exposures to the SE of Sewerby Steps, Sewerby, NE of Bridlington, England, United Kingdom	Cretaceous, Late Cretaceous, Campanian. Flamborough Sponge Bed. local Offaster pilula Zone - Inoceramus lingua Zone	WARD, David, J., 19 Oct 1994	Donated
1080	NHMUK PI S 10658	1	hand specimen				Laosciadia plana (Phillips, 1835)		Yorkshire; Sewerby Steps, Sewerby, Bridlington, Foreshore exposures to the SE of Sewerby Steps, Sewerby, NE of Bridlington, England, United Kingdom	Cretaceous, Late Cretaceous, Campanian. Flamborough Sponge Bed. local Offaster pilula Zone - Inoceramus lingua Zone	WARD, David, J., 19 Oct 1994	Donated
1081	NHMUK PI S 10659	1	hand specimen				Laosciadia plana (Phillips, 1835)		Yorkshire; Sewerby Steps, Sewerby, Bridlington, Foreshore exposures to the SE of Sewerby Steps, Sewerby, NE of Bridlington, England, United Kingdom	Cretaceous, Late Cretaceous, Campanian. Flamborough Sponge Bed. local Offaster pilula Zone - Inoceramus lingua Zone	WARD, David, J., 19 Oct 1994	Donated
1082	NHMUK PI S 10660	1	hand specimen				Laosciadia plana (Phillips, 1835)		Yorkshire; Sewerby Steps, Sewerby, Bridlington, Foreshore exposures to the SE of Sewerby Steps, Sewerby, NE of Bridlington, England, United Kingdom	Cretaceous, Late Cretaceous, Campanian. Flamborough Sponge Bed. local Offaster pilula Zone - Inoceramus lingua Zone	WARD, David, J., 19 Oct 1994	Donated
1083	NHMUK PI S 10661	1	hand specimen				Laosciadia plana (Phillips, 1835)		Yorkshire; Sewerby Steps, Sewerby, Bridlington, Foreshore exposures to the SE of Sewerby Steps, Sewerby, NE of Bridlington, England, United Kingdom	Cretaceous, Late Cretaceous, Campanian. Flamborough Sponge Bed. local Offaster pilula Zone - Inoceramus lingua Zone	WARD, David, J., 19 Oct 1994	Donated
1084	NHMUK PI S 10662	1	hand specimen				Laosciadia plana (Phillips, 1835)		Yorkshire; Sewerby Steps, Sewerby, Bridlington, Foreshore exposures to the SE of Sewerby Steps, Sewerby, NE of Bridlington, England, United Kingdom	Cretaceous, Late Cretaceous, Campanian. Flamborough Sponge Bed. local Offaster pilula Zone - Inoceramus lingua Zone	WARD, David, J., 19 Oct 1994	Donated
1085	NHMUK PI S 10663	1	hand specimen				Laosciadia plana (Phillips, 1835)		Yorkshire; Sewerby Steps, Sewerby, Bridlington, Foreshore exposures to the SE of Sewerby Steps, Sewerby, NE of Bridlington, England, United Kingdom	Cretaceous, Late Cretaceous, Campanian. Flamborough Sponge Bed. local Offaster pilula Zone - Inoceramus lingua Zone	WARD, David, J., 19 Oct 1994	Donated
1086	NHMUK PI S 10664	1	hand specimen				Laosciadia plana (Phillips, 1835)		Yorkshire; Sewerby Steps, Sewerby, Bridlington, Foreshore exposures to the SE of Sewerby Steps, Sewerby, NE of Bridlington, England, United Kingdom	Cretaceous, Late Cretaceous, Campanian. Flamborough Sponge Bed. local Offaster pilula Zone - Inoceramus lingua Zone	WARD, David, J., 19 Oct 1994	Donated
1087	NHMUK PI S 10665	1	hand specimen				Laosciadia plana (Phillips, 1835)		Yorkshire; Sewerby Steps, Sewerby, Bridlington, Foreshore exposures to the SE of Sewerby Steps, Sewerby, NE of Bridlington, England, United Kingdom	Cretaceous, Late Cretaceous, Campanian. Flamborough Sponge Bed. local Offaster pilula Zone - Inoceramus lingua Zone	WARD, David, J., 19 Oct 1994	Donated
1088	NHMUK PI S 10666	1	hand specimen				Laosciadia plana (Phillips, 1835)		Yorkshire; Sewerby Steps, Sewerby, Bridlington, Foreshore exposures to the SE of Sewerby Steps, Sewerby, NE of Bridlington, England, United Kingdom	Cretaceous, Late Cretaceous, Campanian. Flamborough Sponge Bed. local Offaster pilula Zone - Inoceramus lingua Zone	WARD, David, J., 19 Oct 1994	Donated
1089	NHMUK PI S 10667	1	hand specimen				Laosciadia plana (Phillips, 1835)		Yorkshire; Sewerby Steps, Sewerby, Bridlington, Foreshore exposures to the SE of Sewerby Steps, Sewerby, NE of Bridlington, England, United Kingdom	Cretaceous, Late Cretaceous, Campanian. Flamborough Sponge Bed. local Offaster pilula Zone - Inoceramus lingua Zone	WARD, David, J., 19 Oct 1994	Donated
1090	NHMUK PI S 10668	1	hand specimen				Laosciadia plana (Phillips, 1835)		Yorkshire; Sewerby Steps, Sewerby, Bridlington, Foreshore exposures to the SE of Sewerby Steps, Sewerby, NE of Bridlington, England, United Kingdom	Cretaceous, Late Cretaceous, Campanian. Flamborough Sponge Bed. local Offaster pilula Zone - Inoceramus lingua Zone	WARD, David, J., 19 Oct 1994	Donated
1091	NHMUK PI S 10669	1	hand specimen				Laosciadia plana (Phillips, 1835)		Yorkshire; Sewerby Steps, Sewerby, Bridlington, Foreshore exposures to the SE of Sewerby Steps, Sewerby, NE of Bridlington, England, United Kingdom	Cretaceous, Late Cretaceous, Campanian. Flamborough Sponge Bed. local Offaster pilula Zone - Inoceramus lingua Zone	WARD, David, J., 19 Oct 1994	Donated
1092	NHMUK PI S 10670	1	hand specimen				Laosciadia plana (Phillips, 1835)		Yorkshire; Sewerby Steps, Sewerby, Bridlington, Foreshore exposures to the SE of Sewerby Steps, Sewerby, NE of Bridlington, England, United Kingdom	Cretaceous, Late Cretaceous, Campanian. Flamborough Sponge Bed. local Offaster pilula Zone - Inoceramus lingua Zone	WARD, David, J., 19 Oct 1994	Donated
1093	NHMUK PI S 10671	1	hand specimen				Laosciadia plana (Phillips, 1835)		Yorkshire; Sewerby Steps, Sewerby, Bridlington, Foreshore exposures to the SE of Sewerby Steps, Sewerby, NE of Bridlington, England, United Kingdom	Cretaceous, Late Cretaceous, Campanian. Flamborough Sponge Bed. local Offaster pilula Zone - Inoceramus lingua Zone	WARD, David, J., 19 Oct 1994	Donated
1094	NHMUK PI S 10672	1	hand specimen				Laosciadia plana (Phillips, 1835)		Yorkshire; Sewerby Steps, Sewerby, Bridlington, Foreshore exposures to the SE of Sewerby Steps, Sewerby, NE of Bridlington, England, United Kingdom	Cretaceous, Late Cretaceous, Campanian. Flamborough Sponge Bed. local Offaster pilula Zone - Inoceramus lingua Zone	WARD, David, J., 19 Oct 1994	Donated
1095	NHMUK PI S 10673	1	hand specimen				Laosciadia plana (Phillips, 1835)		Yorkshire; Sewerby Steps, Sewerby, Bridlington, Foreshore exposures to the SE of Sewerby Steps, Sewerby, NE of Bridlington, England, United Kingdom	Cretaceous, Late Cretaceous, Campanian. Flamborough Sponge Bed. local Offaster pilula Zone - Inoceramus lingua Zone	WARD, David, J., 19 Oct 1994	Donated
1096	NHMUK PI S 10674	1	hand specimen				Laosciadia plana (Phillips, 1835)		Yorkshire; Sewerby Steps, Sewerby, Bridlington, Foreshore exposures to the SE of Sewerby Steps, Sewerby, NE of Bridlington, England, United Kingdom	Cretaceous, Late Cretaceous, Campanian. Flamborough Sponge Bed. local Offaster pilula Zone - Inoceramus lingua Zone	WARD, David, J., 19 Oct 1994	Donated
1097	NHMUK PI S 10675	1	hand specimen				Laosciadia plana (Phillips, 1835)		Yorkshire; Sewerby Steps, Sewerby, Bridlington, Foreshore exposures to the SE of Sewerby Steps, Sewerby, NE of Bridlington, England, United Kingdom	Cretaceous, Late Cretaceous, Campanian. Flamborough Sponge Bed. local Offaster pilula Zone - Inoceramus lingua Zone	WARD, David, J., 19 Oct 1994	Donated
1098	NHMUK PI S 10676	1	hand specimen				Laosciadia plana (Phillips, 1835)		Yorkshire; Sewerby Steps, Sewerby, Bridlington, Foreshore exposures to the SE of Sewerby Steps, Sewerby, NE of Bridlington, England, United Kingdom	Cretaceous, Late Cretaceous, Campanian. Flamborough Sponge Bed. local Offaster pilula Zone - Inoceramus lingua Zone	WARD, David, J., 19 Oct 1994	Donated
1099	NHMUK PI S 10677	1	hand specimen				Laosciadia plana (Phillips, 1835)		Yorkshire; Sewerby Steps, Sewerby, Bridlington, Foreshore exposures to the SE of Sewerby Steps, Sewerby, NE of Bridlington, England, United Kingdom	Cretaceous, Late Cretaceous, Campanian. Flamborough Sponge Bed. local Offaster pilula Zone - Inoceramus lingua Zone	WARD, David, J., 19 Oct 1994	Donated
1100	NHMUK PI S 10678	1	hand specimen				Laosciadia plana (Phillips, 1835)		Yorkshire; Sewerby Steps, Sewerby, Bridlington, Foreshore exposures to the SE of Sewerby Steps, Sewerby, NE of Bridlington, England, United Kingdom	Cretaceous, Late Cretaceous, Campanian. Flamborough Sponge Bed. local Offaster pilula Zone - Inoceramus lingua Zone	WARD, David, J., 19 Oct 1994	Donated
1101	NHMUK PI S 10679	1	hand specimen				Laosciadia plana (Phillips, 1835)		Yorkshire; Sewerby Steps, Sewerby, Bridlington, Foreshore exposures to the SE of Sewerby Steps, Sewerby, NE of Bridlington, England, United Kingdom	Cretaceous, Late Cretaceous, Campanian. Flamborough Sponge Bed. local Offaster pilula Zone - Inoceramus lingua Zone	WARD, David, J., 19 Oct 1994	Donated
1102	NHMUK PI S 10680	1	hand specimen				Laosciadia plana (Phillips, 1835)		Yorkshire; Sewerby Steps, Sewerby, Bridlington, Foreshore exposures to the SE of Sewerby Steps, Sewerby, NE of Bridlington, England, United Kingdom	Cretaceous, Late Cretaceous, Campanian. Flamborough Sponge Bed. local Offaster pilula Zone - Inoceramus lingua Zone	WARD, David, J., 19 Oct 1994	Donated
1103	NHMUK PI S 10681	1	hand specimen				Laosciadia plana (Phillips, 1835)		Yorkshire; Sewerby Steps, Sewerby, Bridlington, Foreshore exposures to the SE of Sewerby Steps, Sewerby, NE of Bridlington, England, United Kingdom	Cretaceous, Late Cretaceous, Campanian. Flamborough Sponge Bed. local Offaster pilula Zone - Inoceramus lingua Zone	WARD, David, J., 19 Oct 1994	Donated
1104	NHMUK PI S 10682	1	hand specimen				Laosciadia plana (Phillips, 1835)		Yorkshire; Sewerby Steps, Sewerby, Bridlington, Foreshore exposures to the SE of Sewerby Steps, Sewerby, NE of Bridlington, England, United Kingdom	Cretaceous, Late Cretaceous, Campanian. Flamborough Sponge Bed. local Offaster pilula Zone - Inoceramus lingua Zone	WARD, David, J., 19 Oct 1994	Donated
1105	NHMUK PI S 10683	1	hand specimen				Laosciadia plana (Phillips, 1835)		Yorkshire; Sewerby Steps, Sewerby, Bridlington, Foreshore exposures to the SE of Sewerby Steps, Sewerby, NE of Bridlington, England, United Kingdom	Cretaceous, Late Cretaceous, Campanian. Flamborough Sponge Bed. local Offaster pilula Zone - Inoceramus lingua Zone	WARD, David, J., 19 Oct 1994	Donated
1106	NHMUK PI S 10684	1	hand specimen				Laosciadia plana (Phillips, 1835)		Yorkshire; Sewerby Steps, Sewerby, Bridlington, Foreshore exposures to the SE of Sewerby Steps, Sewerby, NE of Bridlington, England, United Kingdom	Cretaceous, Late Cretaceous, Campanian. Flamborough Sponge Bed. local Offaster pilula Zone - Inoceramus lingua Zone	WARD, David, J., 19 Oct 1994	Donated
1107	NHMUK PI S 10685	1	hand specimen				Laosciadia plana (Phillips, 1835)		Yorkshire; Sewerby Steps, Sewerby, Bridlington, Foreshore exposures to the SE of Sewerby Steps, Sewerby, NE of Bridlington, England, United Kingdom	Cretaceous, Late Cretaceous, Campanian. Flamborough Sponge Bed. local Offaster pilula Zone - Inoceramus lingua Zone	WARD, David, J., 19 Oct 1994	Donated
1108	NHMUK PI S 10686	1	hand specimen				Laosciadia plana (Phillips, 1835)		Yorkshire; Sewerby Steps, Sewerby, Bridlington, Foreshore exposures to the SE of Sewerby Steps, Sewerby, NE of Bridlington, England, United Kingdom	Cretaceous, Late Cretaceous, Campanian. Flamborough Sponge Bed. local Offaster pilula Zone - Inoceramus lingua Zone	WARD, David, J., 19 Oct 1994	Donated
1109	NHMUK PI S 10687	1	hand specimen				Laosciadia plana (Phillips, 1835)		Yorkshire; Sewerby Steps, Sewerby, Bridlington, Foreshore exposures to the SE of Sewerby Steps, Sewerby, NE of Bridlington, England, United Kingdom	Cretaceous, Late Cretaceous, Campanian. Flamborough Sponge Bed. local Offaster pilula Zone - Inoceramus lingua Zone	WARD, David, J., 19 Oct 1994	Donated
1110	NHMUK PI S 10688	1	hand specimen				Laosciadia plana (Phillips, 1835)		Yorkshire; Sewerby Steps, Sewerby, Bridlington, Foreshore exposures to the SE of Sewerby Steps, Sewerby, NE of Bridlington, England, United Kingdom	Cretaceous, Late Cretaceous, Campanian. Flamborough Sponge Bed. local Offaster pilula Zone - Inoceramus lingua Zone	WARD, David, J., 19 Oct 1994	Donated
1111	NHMUK PI S 10689	1	hand specimen				Laosciadia plana (Phillips, 1835)		Yorkshire; Sewerby Steps, Sewerby, Bridlington, Foreshore exposures to the SE of Sewerby Steps, Sewerby, NE of Bridlington, England, United Kingdom	Cretaceous, Late Cretaceous, Campanian. Flamborough Sponge Bed. local Offaster pilula Zone - Inoceramus lingua Zone	WARD, David, J., 19 Oct 1994	Donated
1112	NHMUK PI S 10690	1	hand specimen				Laosciadia plana (Phillips, 1835)		Yorkshire; Sewerby Steps, Sewerby, Bridlington, Foreshore exposures to the SE of Sewerby Steps, Sewerby, NE of Bridlington, England, United Kingdom	Cretaceous, Late Cretaceous, Campanian. Flamborough Sponge Bed. local Offaster pilula Zone - Inoceramus lingua Zone	WARD, David, J., 19 Oct 1994	Donated
1113	NHMUK PI S 10691	1	hand specimen				Laosciadia plana (Phillips, 1835)		Yorkshire; Sewerby Steps, Sewerby, Bridlington, Foreshore exposures to the SE of Sewerby Steps, Sewerby, NE of Bridlington, England, United Kingdom	Cretaceous, Late Cretaceous, Campanian. Flamborough Sponge Bed. local Offaster pilula Zone - Inoceramus lingua Zone	WARD, David, J., 19 Oct 1994	Donated
1114	NHMUK PI S 10692	1	hand specimen				Laosciadia plana (Phillips, 1835)		Yorkshire; Sewerby Steps, Sewerby, Bridlington, Foreshore exposures to the SE of Sewerby Steps, Sewerby, NE of Bridlington, England, United Kingdom	Cretaceous, Late Cretaceous, Campanian. Flamborough Sponge Bed. local Offaster pilula Zone - Inoceramus lingua Zone	WARD, David, J., 19 Oct 1994	Donated
1115	NHMUK PI S 10693	1	hand specimen				Laosciadia plana (Phillips, 1835)		Yorkshire; Sewerby Steps, Sewerby, Bridlington, Foreshore exposures to the SE of Sewerby Steps, Sewerby, NE of Bridlington, England, United Kingdom	Cretaceous, Late Cretaceous, Campanian. Flamborough Sponge Bed. local Offaster pilula Zone - Inoceramus lingua Zone	WARD, David, J., 19 Oct 1994	Donated
1116	NHMUK PI S 10694	1	hand specimen				Laosciadia plana (Phillips, 1835)		Yorkshire; Sewerby Steps, Sewerby, Bridlington, Foreshore exposures to the SE of Sewerby Steps, Sewerby, NE of Bridlington, England, United Kingdom	Cretaceous, Late Cretaceous, Campanian. Flamborough Sponge Bed. local Offaster pilula Zone - Inoceramus lingua Zone	WARD, David, J., 19 Oct 1994	Donated
1117	NHMUK PI S 10695	1	hand specimen				Laosciadia plana (Phillips, 1835)		Yorkshire; Sewerby Steps, Sewerby, Bridlington, Foreshore exposures to the SE of Sewerby Steps, Sewerby, NE of Bridlington, England, United Kingdom	Cretaceous, Late Cretaceous, Campanian. Flamborough Sponge Bed. local Offaster pilula Zone - Inoceramus lingua Zone	WARD, David, J., 19 Oct 1994	Donated
1118	NHMUK PI S 10696	1	hand specimen				Laosciadia plana (Phillips, 1835)		Yorkshire; Sewerby Steps, Sewerby, Bridlington, Foreshore exposures to the SE of Sewerby Steps, Sewerby, NE of Bridlington, England, United Kingdom	Cretaceous, Late Cretaceous, Campanian. Flamborough Sponge Bed. local Offaster pilula Zone - Inoceramus lingua Zone	WARD, David, J., 19 Oct 1994	Donated
1119	NHMUK PI S 10697	1	hand specimen				Laosciadia plana (Phillips, 1835)		Yorkshire; Sewerby Steps, Sewerby, Bridlington, Foreshore exposures to the SE of Sewerby Steps, Sewerby, NE of Bridlington, England, United Kingdom	Cretaceous, Late Cretaceous, Campanian. Flamborough Sponge Bed. local Offaster pilula Zone - Inoceramus lingua Zone	WARD, David, J., 19 Oct 1994	Donated
1120	NHMUK PI S 10698	1	hand specimen				Laosciadia plana (Phillips, 1835)		Yorkshire; Sewerby Steps, Sewerby, Bridlington, Foreshore exposures to the SE of Sewerby Steps, Sewerby, NE of Bridlington, England, United Kingdom	Cretaceous, Late Cretaceous, Campanian. Flamborough Sponge Bed. local Offaster pilula Zone - Inoceramus lingua Zone	WARD, David, J., 19 Oct 1994	Donated
1121	NHMUK PI S 10699	1	hand specimen				Laosciadia plana (Phillips, 1835)		Yorkshire; Sewerby Steps, Sewerby, Bridlington, Foreshore exposures to the SE of Sewerby Steps, Sewerby, NE of Bridlington, England, United Kingdom	Cretaceous, Late Cretaceous, Campanian. Flamborough Sponge Bed. local Offaster pilula Zone - Inoceramus lingua Zone	WARD, David, J., 19 Oct 1994	Donated
1122	NHMUK PI S 10700	1	hand specimen				Laosciadia plana (Phillips, 1835)		Yorkshire; Sewerby Steps, Sewerby, Bridlington, Foreshore exposures to the SE of Sewerby Steps, Sewerby, NE of Bridlington, England, United Kingdom	Cretaceous, Late Cretaceous, Campanian. Flamborough Sponge Bed. local Offaster pilula Zone - Inoceramus lingua Zone	WARD, David, J., 19 Oct 1994	Donated
1123	NHMUK PI S 10701	1	hand specimen				Laosciadia plana (Phillips, 1835)		Yorkshire; Sewerby Steps, Sewerby, Bridlington, Foreshore exposures to the SE of Sewerby Steps, Sewerby, NE of Bridlington, England, United Kingdom	Cretaceous, Late Cretaceous, Campanian. Flamborough Sponge Bed. local Offaster pilula Zone - Inoceramus lingua Zone	WARD, David, J., 19 Oct 1994	Donated
1124	NHMUK PI S 10702	1	hand specimen				Laosciadia plana (Phillips, 1835)		Yorkshire; Sewerby Steps, Sewerby, Bridlington, Foreshore exposures to the SE of Sewerby Steps, Sewerby, NE of Bridlington, England, United Kingdom	Cretaceous, Late Cretaceous, Campanian. Flamborough Sponge Bed. local Offaster pilula Zone - Inoceramus lingua Zone	WARD, David, J., 19 Oct 1994	Donated
1125	NHMUK PI S 10703	1	hand specimen				Laosciadia plana (Phillips, 1835)		Yorkshire; Sewerby Steps, Sewerby, Bridlington, Foreshore exposures to the SE of Sewerby Steps, Sewerby, NE of Bridlington, England, United Kingdom	Cretaceous, Late Cretaceous, Campanian. Flamborough Sponge Bed. local Offaster pilula Zone - Inoceramus lingua Zone	WARD, David, J., 19 Oct 1994	Donated
1126	NHMUK PI S 10704	1	hand specimen				Laosciadia plana (Phillips, 1835)		Yorkshire; Sewerby Steps, Sewerby, Bridlington, Foreshore exposures to the SE of Sewerby Steps, Sewerby, NE of Bridlington, England, United Kingdom	Cretaceous, Late Cretaceous, Campanian. Flamborough Sponge Bed. local Offaster pilula Zone - Inoceramus lingua Zone	WARD, David, J., 19 Oct 1994	Donated
1127	NHMUK PI S 10705	1	hand specimen				Laosciadia plana (Phillips, 1835)		Yorkshire; Sewerby Steps, Sewerby, Bridlington, Foreshore exposures to the SE of Sewerby Steps, Sewerby, NE of Bridlington, England, United Kingdom	Cretaceous, Late Cretaceous, Campanian. Flamborough Sponge Bed. local Offaster pilula Zone - Inoceramus lingua Zone	WARD, David, J., 19 Oct 1994	Donated
1128	NHMUK PI S 10706	1	hand specimen				Laosciadia plana (Phillips, 1835)		Yorkshire; Sewerby Steps, Sewerby, Bridlington, Foreshore exposures to the SE of Sewerby Steps, Sewerby, NE of Bridlington, England, United Kingdom	Cretaceous, Late Cretaceous, Campanian. Flamborough Sponge Bed. local Offaster pilula Zone - Inoceramus lingua Zone	WARD, David, J., 19 Oct 1994	Donated
1129	NHMUK PI P 1165 (2)	9	hand specimen				Laosciadia plana (Phillips, 1835)		Flamborough, Yorkshire, England, United Kingdom	Cretaceous, Chalk Group, Upper Chalk	History unrecorded
1130	NHMUK PI P 1165 (4)	8	hand specimen				Laosciadia plana (Phillips, 1835)		Flamborough, Yorkshire, England, United Kingdom	Cretaceous, Chalk Group, Upper Chalk	History unrecorded
1131	NHMUK PI P 1165 (5)	3	hand specimen				Laosciadia plana (Phillips, 1835)		Flamborough, Yorkshire, England, United Kingdom	Cretaceous, Chalk Group, Upper Chalk	History unrecorded
1132	NHMUK PI P 1165 (6)	1	hand specimen				Laosciadia plana (Phillips, 1835)		Flamborough, Yorkshire, England, United Kingdom	Cretaceous, Chalk Group, Upper Chalk	History unrecorded
1133	NHMUK PI P 1165 (7)	6	hand specimen				Laosciadia plana (Phillips, 1835)		Flamborough, Yorkshire, England, United Kingdom	Cretaceous, Chalk Group, Upper Chalk	History unrecorded
1134	NHMUK PI P 1165 (8)	2	hand specimen				Laosciadia plana (Phillips, 1835)		Flamborough, Yorkshire, England, United Kingdom	Cretaceous, Chalk Group, Upper Chalk	History unrecorded
1135	NHMUK PI P 1165 (9)	3	hand specimen				Laosciadia plana (Phillips, 1835)		Flamborough, Yorkshire, England, United Kingdom	Cretaceous, Chalk Group, Upper Chalk	History unrecorded
1136	NHMUK PI P 1165 (10)	3	hand specimen				Laosciadia plana (Phillips, 1835)		Flamborough, Yorkshire, England, United Kingdom	Cretaceous, Chalk Group, Upper Chalk	History unrecorded
1137	NHMUK PI P 1165 (11)	1	hand specimen				Laosciadia plana (Phillips, 1835)		Flamborough, Yorkshire, England, United Kingdom	Cretaceous, Chalk Group, Upper Chalk	History unrecorded
1138	NHMUK PI P 1165 (12)	1	hand specimen				Laosciadia plana (Phillips, 1835)		Flamborough, Yorkshire, England, United Kingdom	Cretaceous, Chalk Group, Upper Chalk	History unrecorded
1139	NHMUK PI P 1165 (13)	2	hand specimen				Laosciadia plana (Phillips, 1835)		Flamborough, Yorkshire, England, United Kingdom	Cretaceous, Chalk Group, Upper Chalk	History unrecorded
1140	NHMUK PI P 1165 (3)	8	hand specimen				Laosciadia plana (Phillips, 1835)		Flamborough, Yorkshire, England, United Kingdom	Cretaceous, Chalk Group, Upper Chalk	History unrecorded
1141	NHMUK PI OR 55219 (2)	3	hand specimen				Laosciadia plana (Phillips, 1835)		Flamborough, Yorkshire, England, United Kingdom	Cretaceous, Chalk Group, Upper Chalk	BOWERBANK, James Scott, 1865	Purchased
1142	NHMUK PI OR 55219 (3)	1	hand specimen				Laosciadia plana (Phillips, 1835)		Flamborough, Yorkshire, England, United Kingdom	Cretaceous, Chalk Group, Upper Chalk	BOWERBANK, James Scott, 1865	Purchased
1143	NHMUK PI OR 55219 (4)	2	hand specimen				Laosciadia plana (Phillips, 1835)		Flamborough, Yorkshire, England, United Kingdom	Cretaceous, Chalk Group, Upper Chalk	BOWERBANK, James Scott, 1865	Purchased
1144	NHMUK PI P 1169 (1)	1	hand specimen				Laosciadia plana (Phillips, 1835)		Flamborough, Yorkshire, England, United Kingdom	Cretaceous, Chalk Group, Upper Chalk	DANIELS Collection
1145	NHMUK PI P 1169 (2)	2	hand specimen				Laosciadia plana (Phillips, 1835)		Flamborough, Yorkshire, England, United Kingdom	Cretaceous, Chalk Group, Upper Chalk	DANIELS Collection
1146	NHMUK PI P 1165 (14)	2	hand specimen				Laosciadia plana (Phillips, 1835)		Flamborough, Yorkshire, England, United Kingdom	Cretaceous, Chalk Group, Upper Chalk	History unrecorded
1147	NHMUK PI P 4127	2	hand specimen				Laosciadia plana (Phillips, 1835)		Flamborough, Yorkshire, England, United Kingdom	Cretaceous, Chalk Group, Upper Chalk	HARFORD, Frederick	Purchased
1148	NHMUK PI P 1203	1	hand specimen				Laosciadia plana (Phillips, 1835)		Flamborough, Yorkshire, England, United Kingdom	Cretaceous, Chalk Group, Upper Chalk, Senonian	History unrecorded
1149	NHMUK PI S 7822	2	hand specimen				Stachyspongia spica (Roemer, 1864)		Folkestone, Kent, England, United Kingdom	Cretaceous, Chalk Group, Grey Chalk	ROWE, Arthur Walter, Nov 1926	Purchased
1150	NHMUK PI S 7822 $1	1	thin section				Stachyspongia spica (Roemer, 1864)		Folkestone, Kent, England, United Kingdom	Cretaceous, Chalk Group, Grey Chalk	ROWE, Arthur Walter, Nov 1926	Purchased
1151	NHMUK PI S 7874	1	hand specimen				Stachyspongia spica (Roemer, 1864)		Dover, Kent, England, United Kingdom	Cretaceous, Lower Chalk, Chalk Marl	ROWE, Arthur Walter, Nov 1926	Purchased
1152	NHMUK PI S 9656	1	hand specimen				Stachyspongia spica (Roemer, 1864)		Dover, Kent, England, United Kingdom	Cretaceous, Chalk Group, Grey Chalk	ROWE, Arthur Walter, Nov 1926	Purchased
1153	NHMUK PI S 8018	1	hand specimen				Stachyspongia Zittel, 1878		Sheepwalk Lane, Flamborough, Yorkshire, England, United Kingdom	Cretaceous, Chalk Group, Upper Chalk, Senonian, A. quadratus zone	ROWE, Arthur Walter, Nov 1926	Purchased
1154	NHMUK PI S 9660	1	hand specimen				Stachyspongia spica (Roemer, 1864)		Dover, Kent, England, United Kingdom	Cretaceous, Chalk Group, Grey Chalk	ROWE, Arthur Walter, Nov 1926	Purchased
1155	NHMUK PI S 9658	1	hand specimen				Stachyspongia spica (Roemer, 1864)		Dover, Kent, England, United Kingdom	Cretaceous, Chalk Group, Grey Chalk	ROWE, Arthur Walter, Nov 1926	Purchased
1156	NHMUK PI S 9654	1	hand specimen				Stachyspongia spica (Roemer, 1864)		Dover, Kent, England, United Kingdom	Cretaceous, Chalk Group, Grey Chalk	ROWE, Arthur Walter, Nov 1926	Purchased
1157	NHMUK PI S 9655	1	hand specimen				Stachyspongia spica (Roemer, 1864)		Dover, Kent, England, United Kingdom	Cretaceous, Chalk Group, Grey Chalk	ROWE, Arthur Walter, Nov 1926	Purchased
1158	NHMUK PI S 7864	2	hand specimen				Stachyspongia spica (Roemer, 1864)		Dover, Kent, England, United Kingdom	Cretaceous, Chalk Group, Grey Chalk	ROWE, Arthur Walter, Nov 1926	Purchased
1159	NHMUK PI P 3118	2	hand specimen				Stachyspongia spica (Roemer, 1864)		South of England	Cretaceous, Chalk Group, Upper Chalk	ROWE, Arthur Walter, Nov 1926	Purchased
1160	NHMUK PI P 4155	5	hand specimen				Stachyspongia spica (Roemer, 1864)		Dover, Kent, England, United Kingdom	Cretaceous, Chalk Group, Lower Chalk	BUTLER, F.H., Mar 1890	Purchased
1161	NHMUK PI S 7821	2	hand specimen				Stachyspongia spica (Roemer, 1864)		Dover, Kent, England, United Kingdom	Cretaceous, Lower Chalk, Chalk Marl	ROWE, Arthur Walter, Nov 1926	Purchased
1162	NHMUK PI P 5118	2	hand specimen				Stachyspongia spica (Roemer, 1864)		Dover, Kent, England, United Kingdom	Cretaceous, Lower Chalk, Chalk Marl	ROWE, Arthur Walter, Nov 1926	Purchased
1163	NHMUK PI P 7612	2	hand specimen				Stachyspongia spica (Roemer, 1864)		Dover, Kent, England, United Kingdom	Cretaceous, Chalk Group, Grey Chalk	BUTLER, F.H., May, 1905	Purchased
1164	NHMUK PI P 1240 (1)	1	hand specimen				Stachyspongia spica (Roemer, 1864)	Figured	Dover, Kent, England, United Kingdom	Cretaceous, Chalk Group, Lower Chalk	SMITH, Joshua Toulmin, 1869	Purchased	Hinde, G.J. 1884. Catalogue of the Fossil Sponges in the Geological Department of the British Museum (Natural History). With descriptions of new and little-known species. BM(NH), London, 248 pp. (on pl.6, fig. 2).	Sendino, C. 2020. The Natural History Museum Fossil Porifera Collection. Collections: A Journal for Museum and Archives Professionals, 16(4): 363-380. DOI: 10.1177/1550190620964042 (on Fig. 2 D)
1165	NHMUK PI P 1240 (2)	2	hand specimen				Stachyspongia spica (Roemer, 1864)	Figured	Dover, Kent, England, United Kingdom	Cretaceous, Chalk Group, Lower Chalk	SMITH, Joshua Toulmin, 1869	Purchased	Hinde, G.J. 1884. Catalogue of the Fossil Sponges in the Geological Department of the British Museum (Natural History). With descriptions of new and little-known species. BM(NH), London, 248 pp. (on pl.6, fig. 2a)
1166	NHMUK PI S 6986	1	hand specimen				Stachyspongia spica (Roemer, 1864)		Dover, Kent, England, United Kingdom	Cretaceous, Chalk Group, Lower Chalk	ROWE, Arthur Walter, Nov 1926	Purchased
1167	NHMUK PI S 7657	1	hand specimen				Stachyspongia spica (Roemer, 1864)		Dover, Kent, England, United Kingdom	Cretaceous, Chalk Group, Grey Chalk	ROWE, Arthur Walter, Nov 1926	Purchased
1168	NHMUK PI P 1244 (1)	1	hand specimen				Aulosoma radiciformis (Phillips, 1835)		Flamborough, Yorkshire, England, United Kingdom	Cretaceous, Chalk Group, Upper Chalk	History unrecorded
1169	NHMUK PI P 1244 (2)	8	hand specimen				Aulosoma radiciformis (Phillips, 1835)		Flamborough, Yorkshire, England, United Kingdom	Cretaceous, Chalk Group, Upper Chalk	History unrecorded
1170	NHMUK PI P 1244 (3)	6	hand specimen				Aulosoma radiciformis (Phillips, 1835)		Flamborough, Yorkshire, England, United Kingdom	Cretaceous, Chalk Group, Upper Chalk	History unrecorded
1171	NHMUK PI P 1244 (4)	2	hand specimen				Aulosoma radiciformis (Phillips, 1835)		Flamborough, Yorkshire, England, United Kingdom	Cretaceous, Chalk Group, Upper Chalk	LEE, John Edward Collection, October 1885	Presented
1172	NHMUK PI P 1244 (5)	2	hand specimen				Aulosoma radiciformis (Phillips, 1835)		Flamborough, Yorkshire, England, United Kingdom	Cretaceous, Chalk Group, Upper Chalk	History unrecorded
1173	NHMUK PI P 1244 (6)	5	hand specimen				Aulosoma radiciformis (Phillips, 1835)		Flamborough, Yorkshire, England, United Kingdom	Cretaceous, Chalk Group, Upper Chalk	History unrecorded
1174	NHMUK PI P 1244 (7)	4	hand specimen				Aulosoma radiciformis (Phillips, 1835)		Flamborough, Yorkshire, England, United Kingdom	Cretaceous, Chalk Group, Upper Chalk	History unrecorded
1175	NHMUK PI P 1244 (1) $1	1	thin section				Aulosoma radiciformis (Phillips, 1835)		Flamborough, Yorkshire, England, United Kingdom	Cretaceous, Chalk Group, Upper Chalk	History unrecorded
1176	NHMUK PI P 1244 (8)	2	hand specimen				Aulosoma radiciformis (Phillips, 1835)		Flamborough, Yorkshire, England, United Kingdom	Cretaceous, Chalk Group, Upper Chalk	History unrecorded
1177	NHMUK PI P 1244 (9)	7	hand specimen				Aulosoma radiciformis (Phillips, 1835)		Flamborough, Yorkshire, England, United Kingdom	Cretaceous, Chalk Group, Upper Chalk	History unrecorded
1178	NHMUK PI P 1244 (10)	6	hand specimen				Aulosoma radiciformis (Phillips, 1835)		Flamborough, Yorkshire, England, United Kingdom	Cretaceous, Chalk Group, Upper Chalk	History unrecorded
1179	NHMUK PI P 1244 (11)	3	hand specimen				Aulosoma radiciformis (Phillips, 1835)	Figured	Flamborough, Yorkshire, England, United Kingdom	Cretaceous, Chalk Group, Upper Chalk	History unrecorded		Hinde, G.J. 1884. Catalogue of the Fossil Sponges in the Geological Department of the British Museum (Natural History). With descriptions of new and little-known species. BM(NH), London, 248 pp. (on pl.6, fig. 4a as Scytalia)
1180	NHMUK PI P 1244 (12)	1	hand specimen				Aulosoma radiciformis (Phillips, 1835)	Figured	Flamborough, Yorkshire, England, United Kingdom	Cretaceous, Chalk Group, Upper Chalk	History unrecorded		Hinde, G.J. 1884. Catalogue of the Fossil Sponges in the Geological Department of the British Museum (Natural History). With descriptions of new and little-known species. BM(NH), London, 248 pp. (on pl.6, fig. 4)
1181	NHMUK PI P 1244 (13)	22	hand specimen				Aulosoma radiciformis (Phillips, 1835)		Flamborough, Yorkshire, England, United Kingdom	Cretaceous, Chalk Group, Upper Chalk	History unrecorded
1182	NHMUK PI P 1244 (1) $2	1	thin section				Aulosoma radiciformis (Phillips, 1835)		Flamborough, Yorkshire, England, United Kingdom	Cretaceous, Chalk Group, Upper Chalk	History unrecorded
1183	NHMUK PI P 3568 (1)	3	hand specimen				Aulosoma radiciformis (Phillips, 1835)		Flamborough, Yorkshire, England, United Kingdom	Cretaceous, Chalk Group, Upper Chalk	LEE, John Edward Collection, October 1885	Presented
1184	NHMUK PI S 5481	1	hand specimen				Aulosoma radiciformis (Phillips, 1835)		Flamborough, Yorkshire, England, United Kingdom	Cretaceous, Chalk Group, Upper Chalk	LEE, John Edward Collection, October 1885	Presented
1185	NHMUK PI S 5482	1	hand specimen				Aulosoma radiciformis (Phillips, 1835)		Flamborough, Yorkshire, England, United Kingdom	Cretaceous, Chalk Group, Upper Chalk	LEE, John Edward Collection, October 1885	Presented
1186	NHMUK PI S 5483	4	hand specimen				Aulosoma radiciformis (Phillips, 1835)		Flamborough, Yorkshire, England, United Kingdom	Cretaceous, Chalk Group, Upper Chalk	LEE, John Edward Collection, October 1885	Presented
1187	NHMUK PI P 3568 (2)	5	hand specimen				Aulosoma radiciformis (Phillips, 1835)		Flamborough, Yorkshire, England, United Kingdom	Cretaceous, Chalk Group, Upper Chalk	LEE, John Edward Collection, October 1885	Presented
1188	NHMUK PI P 3568 (3)	16	hand specimen				Aulosoma radiciformis (Phillips, 1835)		Flamborough, Yorkshire, England, United Kingdom	Cretaceous, Chalk Group, Upper Chalk	LEE, John Edward Collection, October 1885	Presented
1189	NHMUK PI P 3568 (4)	8	hand specimen				Aulosoma radiciformis (Phillips, 1835)		Flamborough, Yorkshire, England, United Kingdom	Cretaceous, Chalk Group, Upper Chalk	LEE, John Edward Collection, October 1885	Presented
1190	NHMUK PI S 3752	1	hand specimen				Scytalia Zittel, 1878		Dane's Dyke, Sewerby, Bridlington, Yorkshire, England, United Kingdom	Cretaceous, Chalk Group, Upper Chalk, Senonian, A. quadratus zone	WRIGHT, Claud William, 10/10/1933	Donated
1191	NHMUK PI S 7984	1	hand specimen				Aulosoma radiciformis (Phillips, 1835)		Flamborough, Yorkshire, England, United Kingdom	Cretaceous, Chalk Group, Upper Chalk, Senonian, A. quadratus zone	ROWE, Arthur Walter, Nov 1926	Purchased
1192	NHMUK PI S 7985	1	hand specimen				Aulosoma radiciformis (Phillips, 1835)		Flamborough, Yorkshire, England, United Kingdom	Cretaceous, Chalk Group, Upper Chalk, Senonian, A. quadratus zone	ROWE, Arthur Walter, Nov 1926	Purchased
1193	NHMUK PI S 7986	1	hand specimen				Aulosoma radiciformis (Phillips, 1835)		Flamborough, Yorkshire, England, United Kingdom	Cretaceous, Chalk Group, Upper Chalk, Senonian, A. quadratus zone	ROWE, Arthur Walter, Nov 1926	Purchased
1194	NHMUK PI S 7987	1	hand specimen				Aulosoma radiciformis (Phillips, 1835)		Flamborough, Yorkshire, England, United Kingdom	Cretaceous, Chalk Group, Upper Chalk, Senonian, A. quadratus zone	ROWE, Arthur Walter, Nov 1926	Purchased
1195	NHMUK PI S 7988	1	hand specimen				Aulosoma radiciformis (Phillips, 1835)		Flamborough, Yorkshire, England, United Kingdom	Cretaceous, Chalk Group, Upper Chalk, Senonian, A. quadratus zone	ROWE, Arthur Walter, Nov 1926	Purchased
1196	NHMUK PI S 7983	1	hand specimen				Aulosoma radiciformis (Phillips, 1835)		Flamborough, Yorkshire, England, United Kingdom	Cretaceous, Chalk Group, Upper Chalk, Senonian, A. quadratus zone	ROWE, Arthur Walter, Nov 1926	Purchased
1197	NHMUK PI S 7971	1	hand specimen				Aulosoma radiciformis (Phillips, 1835)		Flamborough, Yorkshire, England, United Kingdom	Cretaceous, Chalk Group, Upper Chalk, Senonian, A. quadratus zone	ROWE, Arthur Walter, Nov 1926	Purchased
1198	NHMUK PI S 7972	1	hand specimen				Aulosoma radiciformis (Phillips, 1835)		Flamborough, Yorkshire, England, United Kingdom	Cretaceous, Chalk Group, Upper Chalk, Senonian, A. quadratus zone	ROWE, Arthur Walter, Nov 1926	Purchased
1199	NHMUK PI S 7973	1	hand specimen				Aulosoma radiciformis (Phillips, 1835)		Flamborough, Yorkshire, England, United Kingdom	Cretaceous, Chalk Group, Upper Chalk, Senonian, A. quadratus zone	ROWE, Arthur Walter, Nov 1926	Purchased
1200	NHMUK PI S 7974	1	hand specimen				Aulosoma radiciformis (Phillips, 1835)		Flamborough, Yorkshire, England, United Kingdom	Cretaceous, Chalk Group, Upper Chalk, Senonian, A. quadratus zone	ROWE, Arthur Walter, Nov 1926	Purchased
1201	NHMUK PI S 7975	1	hand specimen				Aulosoma radiciformis (Phillips, 1835)		Flamborough, Yorkshire, England, United Kingdom	Cretaceous, Chalk Group, Upper Chalk, Senonian, A. quadratus zone	ROWE, Arthur Walter, Nov 1926	Purchased
1202	NHMUK PI S 7976	1	hand specimen				Aulosoma radiciformis (Phillips, 1835)		Flamborough, Yorkshire, England, United Kingdom	Cretaceous, Chalk Group, Upper Chalk, Senonian, A. quadratus zone	ROWE, Arthur Walter, Nov 1926	Purchased
1203	NHMUK PI S 9565	1	hand specimen				Aulosoma radiciformis (Phillips, 1835)		Sewerby, Bridlington, Yorkshire, England, United Kingdom	Cretaceous, Chalk Group, Upper Chalk, Senonian, A. quadratus zone	ROWE, Arthur Walter, Nov 1926	Purchased
1204	NHMUK PI S 9566	1	hand specimen				Aulosoma radiciformis (Phillips, 1835)		Sewerby, Bridlington, Yorkshire, England, United Kingdom	Cretaceous, Chalk Group, Upper Chalk, Senonian, A. quadratus zone	ROWE, Arthur Walter, Nov 1926	Purchased
1205	NHMUK PI S 9567	1	hand specimen				Aulosoma radiciformis (Phillips, 1835)		Sewerby, Bridlington, Yorkshire, England, United Kingdom	Cretaceous, Chalk Group, Upper Chalk, Senonian, A. quadratus zone	ROWE, Arthur Walter, Nov 1926	Purchased
1206	NHMUK PI S 7992	1	hand specimen				Aulosoma radiciformis (Phillips, 1835)		Sewerby, Bridlington, Yorkshire, England, United Kingdom	Cretaceous, Chalk Group, Upper Chalk, Senonian, A. quadratus zone	ROWE, Arthur Walter, Nov 1926	Purchased
1207	NHMUK PI S 7993	1	hand specimen				Aulosoma radiciformis (Phillips, 1835)		Bridlington, Yorkshire, England, United Kingdom	Cretaceous, Upper Chalk, Marsupites zone	ROWE, Arthur Walter, Nov 1926	Purchased
1208	NHMUK PI S 7968	1	hand specimen				Aulosoma radiciformis (Phillips, 1835)		Flamborough, Yorkshire, England, United Kingdom	Cretaceous, Chalk Group, Upper Chalk, Senonian, A. quadratus zone	ROWE, Arthur Walter, Nov 1926	Purchased
1209	NHMUK PI S 7969	1	hand specimen				Aulosoma radiciformis (Phillips, 1835)		Flamborough, Yorkshire, England, United Kingdom	Cretaceous, Chalk Group, Upper Chalk, Senonian, A. quadratus zone	ROWE, Arthur Walter, Nov 1926	Purchased
1210	NHMUK PI S 7970	1	hand specimen				Aulosoma radiciformis (Phillips, 1835)		Flamborough, Yorkshire, England, United Kingdom	Cretaceous, Chalk Group, Upper Chalk, Senonian, A. quadratus zone	ROWE, Arthur Walter, Nov 1926	Purchased
1211	NHMUK PI S 7964	1	hand specimen				Aulosoma radiciformis (Phillips, 1835)		Flamborough, Yorkshire, England, United Kingdom	Cretaceous, Chalk Group, Upper Chalk, Senonian, A. quadratus zone	ROWE, Arthur Walter, Nov 1926	Purchased
1212	NHMUK PI S 7965	1	hand specimen				Aulosoma radiciformis (Phillips, 1835)		Flamborough, Yorkshire, England, United Kingdom	Cretaceous, Chalk Group, Upper Chalk, Senonian, A. quadratus zone	ROWE, Arthur Walter, Nov 1926	Purchased
1213	NHMUK PI S 7966	1	hand specimen				Aulosoma radiciformis (Phillips, 1835)		Flamborough, Yorkshire, England, United Kingdom	Cretaceous, Chalk Group, Upper Chalk, Senonian, A. quadratus zone	ROWE, Arthur Walter, Nov 1926	Purchased
1214	NHMUK PI S 7967	1	hand specimen				Aulosoma radiciformis (Phillips, 1835)		Flamborough, Yorkshire, England, United Kingdom	Cretaceous, Chalk Group, Upper Chalk, Senonian, A. quadratus zone	ROWE, Arthur Walter, Nov 1926	Purchased
1215	NHMUK PI S 7989	1	hand specimen				Aulosoma radiciformis (Phillips, 1835)		Flamborough, Yorkshire, England, United Kingdom	Cretaceous, Chalk Group, Upper Chalk, Senonian, A. quadratus zone	ROWE, Arthur Walter, Nov 1926	Purchased
1216	NHMUK PI S 7990	1	hand specimen				Aulosoma radiciformis (Phillips, 1835)		Flamborough, Yorkshire, England, United Kingdom	Cretaceous, Chalk Group, Upper Chalk, Senonian, A. quadratus zone	ROWE, Arthur Walter, Nov 1926	Purchased
1217	NHMUK PI S 7991	1	hand specimen				Aulosoma radiciformis (Phillips, 1835)		Flamborough, Yorkshire, England, United Kingdom	Cretaceous, Chalk Group, Upper Chalk, Senonian, A. quadratus zone	ROWE, Arthur Walter, Nov 1926	Purchased
1218	NHMUK PI S 9980	1	hand specimen				Aulosoma radiciformis (Phillips, 1835)		Yorkshire, England, United Kingdom	Cretaceous, Chalk Group, Upper Chalk, Senonian	WRIGHT, Claud William, Collection [1933]	Presented
1219	NHMUK PI S 9981	1	hand specimen				Aulosoma radiciformis (Phillips, 1835)		Yorkshire, England, United Kingdom	Cretaceous, Chalk Group, Upper Chalk, Senonian	WRIGHT, Claud William, Collection [1933]	Presented
1220	NHMUK PI S 9982	1	hand specimen				Aulosoma radiciformis (Phillips, 1835)		Yorkshire, England, United Kingdom	Cretaceous, Chalk Group, Upper Chalk, Senonian	WRIGHT, Claud William, Collection [1933]	Presented
1221	NHMUK PI S 9983	1	hand specimen				Aulosoma radiciformis (Phillips, 1835)		Yorkshire, England, United Kingdom	Cretaceous, Chalk Group, Upper Chalk, Senonian	WRIGHT, Claud William, Collection [1933]	Presented
1222	NHMUK PI S 9984	1	hand specimen				Aulosoma radiciformis (Phillips, 1835)		Yorkshire, England, United Kingdom	Cretaceous, Chalk Group, Upper Chalk, Senonian	WRIGHT, Claud William, Collection [1933]	Presented
1223	NHMUK PI S 9985	1	hand specimen				Aulosoma radiciformis (Phillips, 1835)		Yorkshire, England, United Kingdom	Cretaceous, Chalk Group, Upper Chalk, Senonian	WRIGHT, Claud William, Collection [1933]	Presented
1224	NHMUK PI S 9986	1	hand specimen				Aulosoma radiciformis (Phillips, 1835)		White Hill Water, Yorkshire, England, United Kingdom	Cretaceous, Chalk Group, Upper Chalk, Senonian, I. lingua zone	WRIGHT, Claud William, Collection [1933]	Presented
1225	NHMUK PI S 9973	1	hand specimen				Aulosoma radiciformis (Phillips, 1835)		Sewerby-Dane's Dyke, Yorkshire, England United Kingdom	Cretaceous, Chalk Group, Upper Chalk, Senonian, I. lingua zone	WRIGHT, Claud William, Collection [1933]	Presented
1226	NHMUK PI S 9974	1	hand specimen		17814	Wright Collection number	Aulosoma radiciformis (Phillips, 1835)		Sewerby-Dane's Dyke, Yorkshire, England United Kingdom	Cretaceous, Chalk Group, Upper Chalk, Senonian, I. lingua zone	WRIGHT, Claud William, Collection [1933]	Presented
1227	NHMUK PI S 9975	1	hand specimen		2985	Wright Collection number	Aulosoma radiciformis (Phillips, 1835)		Sewerby-Dane's Dyke, Yorkshire, England United Kingdom	Cretaceous, Chalk Group, Upper Chalk, Senonian, I. lingua zone	WRIGHT, Claud William, Collection [1933]	Presented
1228	NHMUK PI S 9976	1	hand specimen		12989	Wright Collection number	Aulosoma radiciformis (Phillips, 1835)		Sewerby-Dane's Dyke, Yorkshire, England United Kingdom	Cretaceous, Chalk Group, Upper Chalk, Senonian, I. lingua zone	WRIGHT, Claud William, Collection [1933]	Presented
1229	NHMUK PI S 9977	1	hand specimen		12986	Wright Collection number	Aulosoma radiciformis (Phillips, 1835)		Sewerby-Dane's Dyke, Yorkshire, England United Kingdom	Cretaceous, Chalk Group, Upper Chalk, Senonian, I. lingua zone	WRIGHT, Claud William, Collection [1933]	Presented
1230	NHMUK PI S 9978	1	hand specimen		12988	Wright Collection number	Aulosoma radiciformis (Phillips, 1835)		Sewerby-Dane's Dyke, Yorkshire, England United Kingdom	Cretaceous, Chalk Group, Upper Chalk, Senonian, I. lingua zone	WRIGHT, Claud William, Collection [1933]	Presented
1231	NHMUK PI S 9979	1	hand specimen		12982	Wright Collection number	Aulosoma radiciformis (Phillips, 1835)		Sewerby-Dane's Dyke, Yorkshire, England United Kingdom	Cretaceous, Chalk Group, Upper Chalk, Senonian, I. lingua zone	WRIGHT, Claud William, Collection [1933]	Presented
1232	NHMUK PI S 7977	1	hand specimen				Aulosoma radiciformis (Phillips, 1835)		Flamborough, Yorkshire, England, United Kingdom	Cretaceous, Chalk Group, Upper Chalk, Senonian, A. quadratus zone	ROWE, Arthur Walter, Nov 1926	Purchased
1233	NHMUK PI S 7978	1	hand specimen				Aulosoma radiciformis (Phillips, 1835)		Flamborough, Yorkshire, England, United Kingdom	Cretaceous, Chalk Group, Upper Chalk, Senonian, A. quadratus zone	ROWE, Arthur Walter, Nov 1926	Purchased
1234	NHMUK PI S 7979	1	hand specimen				Aulosoma radiciformis (Phillips, 1835)		Flamborough, Yorkshire, England, United Kingdom	Cretaceous, Chalk Group, Upper Chalk, Senonian, A. quadratus zone	ROWE, Arthur Walter, Nov 1926	Purchased
1235	NHMUK PI S 7980	1	hand specimen				Aulosoma radiciformis (Phillips, 1835)		Flamborough, Yorkshire, England, United Kingdom	Cretaceous, Chalk Group, Upper Chalk, Senonian, A. quadratus zone	ROWE, Arthur Walter, Nov 1926	Purchased
1236	NHMUK PI S 7981	1	hand specimen				Aulosoma radiciformis (Phillips, 1835)		Flamborough, Yorkshire, England, United Kingdom	Cretaceous, Chalk Group, Upper Chalk, Senonian, A. quadratus zone	ROWE, Arthur Walter, Nov 1926	Purchased
1237	NHMUK PI S 7982	1	hand specimen				Aulosoma radiciformis (Phillips, 1835)		Flamborough, Yorkshire, England, United Kingdom	Cretaceous, Chalk Group, Upper Chalk, Senonian, A. quadratus zone	ROWE, Arthur Walter, Nov 1926	Purchased
1238	NHMUK PI S 9952	1	hand specimen		12984	Wright Collection number	Aulosoma radiciformis (Phillips, 1835)		Sewerby-Dane's Dyke, Yorkshire, England United Kingdom	Cretaceous, Chalk Group, Upper Chalk, Senonian, I. lingua zone	WRIGHT, Claud William, Collection [1933]	Presented
1239	NHMUK PI S 9953	1	hand specimen		575	Wright Collection number	Aulosoma radiciformis (Phillips, 1835)		Yorkshire, England, United Kingdom	Cretaceous, Chalk Group, Upper Chalk, Senonian	WRIGHT, Claud William, Collection [1933]	Presented
1240	NHMUK PI S 7473	1	hand specimen				Aulosoma radiciformis (Phillips, 1835)		Yorkshire, England, United Kingdom	Cretaceous, Chalk Group, Upper Chalk	METCALFE, H. F., May 1953	Donated
1241	NHMUK PI S 992 (1)	1	thin section	Spicules			Doryderma Zittel, 1878		Haslemere, Surrey, England, United Kingdom	Cretaceous, Lower Greensand	HINDE, Dr. George Jennings, 1918	Presented
1242	NHMUK PI S 897	1	thin section	Spicules			Lithistida Schmidt, 1870		Warminster, Wiltshire, England, United Kingdom	Cretaceous, Upper Greensand	HINDE, Dr. George Jennings, 1918	Presented
1243	NHMUK PI S 992 (2)	1	thin section	Spicules			Doryderma Zittel, 1878		Haslemere, Surrey, England, United Kingdom	Cretaceous, Lower Greensand	HINDE, Dr. George Jennings, 1918	Presented
1244	NHMUK PI P 1235 (1)	1	hand specimen				Jereopsis clava (Lee, 1839)		Flamborough, Yorkshire, England, United Kingdom	Cretaceous, Chalk Group, Upper Chalk	History unrecorded
1245	NHMUK PI P 1235 (2)	1	hand specimen				Jereopsis clava (Lee, 1839)		Flamborough, Yorkshire, England, United Kingdom	Cretaceous, Chalk Group, Upper Chalk	History unrecorded
1246	NHMUK PI P 3578 (1)	3	hand specimen				Jereopsis clava (Lee, 1839)		Flamborough, Yorkshire, England, United Kingdom	Cretaceous, Chalk Group, Upper Chalk	LEE, John Edward Collection, October 1885	Presented
1247	NHMUK PI P 3578 (2)	2	hand specimen				Jereopsis clava (Lee, 1839)		Flamborough, Yorkshire, England, United Kingdom	Cretaceous, Chalk Group, Upper Chalk	LEE, John Edward Collection, October 1885	Presented
1248	NHMUK PI P 3578 (3)	2	hand specimen				Jereopsis clava (Lee, 1839)		Flamborough, Yorkshire, England, United Kingdom	Cretaceous, Chalk Group, Upper Chalk	LEE, John Edward Collection, October 1885	Presented
1249	NHMUK PI S 8020	2	hand specimen				Jereopsis clava (Lee, 1839)		Flamborough, Yorkshire, England, United Kingdom	Cretaceous, Chalk Group, Upper Chalk	ROWE, Arthur Walter, Nov 1926	Purchased
1250	NHMUK PI S 8019	2	hand specimen				Jereopsis clava (Lee, 1839)		Flamborough, Yorkshire, England, United Kingdom	Cretaceous, Chalk Group, Upper Chalk	ROWE, Arthur Walter, Nov 1926	Purchased
1251	NHMUK PI S 8021	1	hand specimen				Jereopsis clava (Lee, 1839)		Flamborough, Yorkshire, England, United Kingdom	Cretaceous, Chalk Group, Upper Chalk	ROWE, Arthur Walter, Nov 1926	Purchased
1252	NHMUK PI S 10707	1	hand specimen				Jereopsis clava (Lee, 1839)		Yorkshire; Sewerby Steps, Sewerby, Bridlington, Foreshore exposures to the SE of Sewerby Steps, Sewerby, NE of Bridlington, England, United Kingdom	Cretaceous, Late Cretaceous, Campanian. Flamborough Sponge Bed. local Offaster pilula Zone - Inoceramus lingua Zone	WARD, David, J., 19 Oct 1994	Donated
1253	NHMUK PI S 10708	1	hand specimen				Jereopsis clava (Lee, 1839)		Yorkshire; Sewerby Steps, Sewerby, Bridlington, Foreshore exposures to the SE of Sewerby Steps, Sewerby, NE of Bridlington, England, United Kingdom	Cretaceous, Late Cretaceous, Campanian. Flamborough Sponge Bed. local Offaster pilula Zone - Inoceramus lingua Zone	WARD, David, J., 19 Oct 1994	Donated
1254	NHMUK PI S 10709	1	hand specimen				Jereopsis clava (Lee, 1839)		Yorkshire; Sewerby Steps, Sewerby, Bridlington, Foreshore exposures to the SE of Sewerby Steps, Sewerby, NE of Bridlington, England, United Kingdom	Cretaceous, Late Cretaceous, Campanian. Flamborough Sponge Bed. local Offaster pilula Zone - Inoceramus lingua Zone	WARD, David, J., 19 Oct 1994	Donated
1255	NHMUK PI S 10710	1	hand specimen				Jereopsis clava (Lee, 1839)		Yorkshire; Sewerby Steps, Sewerby, Bridlington, Foreshore exposures to the SE of Sewerby Steps, Sewerby, NE of Bridlington, England, United Kingdom	Cretaceous, Late Cretaceous, Campanian. Flamborough Sponge Bed. local Offaster pilula Zone - Inoceramus lingua Zone	WARD, David, J., 19 Oct 1994	Donated
1256	NHMUK PI S 10711	1	hand specimen				Jereopsis clava (Lee, 1839)		Yorkshire; Sewerby Steps, Sewerby, Bridlington, Foreshore exposures to the SE of Sewerby Steps, Sewerby, NE of Bridlington, England, United Kingdom	Cretaceous, Late Cretaceous, Campanian. Flamborough Sponge Bed. local Offaster pilula Zone - Inoceramus lingua Zone	WARD, David, J., 19 Oct 1994	Donated
1257	NHMUK PI S 10712	1	hand specimen				Jereopsis clava (Lee, 1839)		Yorkshire; Sewerby Steps, Sewerby, Bridlington, Foreshore exposures to the SE of Sewerby Steps, Sewerby, NE of Bridlington, England, United Kingdom	Cretaceous, Late Cretaceous, Campanian. Flamborough Sponge Bed. local Offaster pilula Zone - Inoceramus lingua Zone	WARD, David, J., 19 Oct 1994	Donated
1258	NHMUK PI P 1349	2	hand specimen				Jereica cylindrica Hinde, 1884	Holotype	Wiltshire, England, United Kingdom	Cretaceous, Upper Greensand	History unrecorded		Hinde, G.J. 1884. Catalogue of the Fossil Sponges in the Geological Department of the British Museum (Natural History). With descriptions of new and little-known species. BM(NH), London, 248 pp. (on pl.6, figs. 1, 1a)
1259	NHMUK PI P 1233	2	hand specimen				Stichophyma tumidum Hinde, 1884	Syntype	South of England	Cretaceous, Chalk Group, Upper Chalk	History unrecorded		Hinde, G.J. 1884. Catalogue of the Fossil Sponges in the Geological Department of the British Museum (Natural History). With descriptions of new and little-known species. BM(NH), London, 248 pp. (on p. 42)
1260	NHMUK PI P 4132	2	hand specimen				Stichophyma tumidum Hinde, 1884		South of England	Cretaceous, Chalk Group, Upper Chalk	History unrecorded
1261	NHMUK PI P 1234 (1)	1	hand specimen				Stichophyma tumidum Hinde, 1884		Charlton, Kent, England, United Kingdom	Cretaceous, Chalk Group, Upper Chalk, Senonian	History unrecorded
1262	NHMUK PI P 1234 (2)	1	hand specimen				Stichophyma tumidum Hinde, 1884		Bromley, Kent, England, United Kingdom	Cretaceous, Chalk Group, Upper Chalk	History unrecorded
1263	NHMUK PI P 1231	1	hand specimen				Stichophyma tumidum Hinde, 1884		Gravesend, Kent, England, United Kingdom	Cretaceous, Chalk Group, Upper Chalk	History unrecorded
1264	NHMUK PI S 8023	1	hand specimen				Stichophyma tumidum Hinde, 1884		Sewerby, Bridlington, Yorkshire, England, United Kingdom	Cretaceous, Chalk Group, Upper Chalk	History unrecorded
1265	NHMUK PI P 2231	1	hand specimen				Stichophyma tumidum Hinde, 1884		South of England	Cretaceous, Chalk Group, Upper Chalk	History unrecorded
1266	NHMUK PI S 9588	1	hand specimen				Stichophyma Pomel, 1872		Flamborough, Yorkshire, England, United Kingdom	Cretaceous, Chalk Group, Upper Chalk, Senonian, A. quadratus zone	ROWE, Arthur Walter, Nov 1926	Purchased
1267	NHMUK PI S 8017	1	hand specimen				Stichophyma tumidum Hinde, 1884		Flamborough, Yorkshire, England, United Kingdom	Cretaceous, Chalk Group, Upper Chalk	ROWE, Arthur Walter, Nov 1926	Purchased
1268	NHMUK PI S 10713	1	hand specimen				Stichophyma tumidum Hinde, 1884		Flamborough, Yorkshire, England, United Kingdom	Cretaceous, Chalk Group, Upper Chalk, Senonian	History unrecorded
1269	NHMUK PI S 10714	2	hand specimen				Stichophyma tumidum Hinde, 1884		Yorkshire; Sewerby Steps, Sewerby, Bridlington, Foreshore exposures to the SE of Sewerby Steps, Sewerby, NE of Bridlington, England, United Kingdom	Cretaceous, Late Cretaceous, Campanian. Flamborough Sponge Bed. local Offaster pilula Zone - Inoceramus lingua Zone	WARD, David, J., 19 Oct 1994	Donated
1270	NHMUK PI S 10715	1	hand specimen				Stichophyma tumidum Hinde, 1884		Yorkshire; Sewerby Steps, Sewerby, Bridlington, Foreshore exposures to the SE of Sewerby Steps, Sewerby, NE of Bridlington, England, United Kingdom	Cretaceous, Late Cretaceous, Campanian. Flamborough Sponge Bed. local Offaster pilula Zone - Inoceramus lingua Zone	WARD, David, J., 19 Oct 1994	Donated
1271	NHMUK PI S 10716	4	hand specimen				Stichophyma tumidum Hinde, 1884		Yorkshire; Sewerby Steps, Sewerby, Bridlington, Foreshore exposures to the SE of Sewerby Steps, Sewerby, NE of Bridlington, England, United Kingdom	Cretaceous, Late Cretaceous, Campanian. Flamborough Sponge Bed. local Offaster pilula Zone - Inoceramus lingua Zone	WARD, David, J., 19 Oct 1994	Donated
1272	NHMUK PI S 9961	1	hand specimen		12970	Wright Collection number	Stichophyma tumidum Hinde, 1884		Dane's Dyke, Sewerby, Bridlington, Yorkshire, England, United Kingdom	Cretaceous, Chalk Group, Upper Chalk, Senonian, I. lingua zone	WRIGHT, Claud William, Collection [1933]	Presented
1273	NHMUK PI S 9965	1	hand specimen		12994	Wright Collection number	Stichophyma tumidum Hinde, 1884		Dane's Dyke, Sewerby, Bridlington, Yorkshire, England, United Kingdom	Cretaceous, Chalk Group, Upper Chalk, Senonian, I. lingua zone	WRIGHT, Claud William, Collection [1933]	Presented
1274	NHMUK PI S 9962	1	hand specimen		12974	Wright Collection number	Stichophyma tumidum Hinde, 1884		Dane's Dyke, Sewerby, Bridlington, Yorkshire, England, United Kingdom	Cretaceous, Chalk Group, Upper Chalk, Senonian, I. lingua zone	WRIGHT, Claud William, Collection [1933]	Presented
1275	NHMUK PI S 9963	1	hand specimen		12972	Wright Collection number	Stichophyma tumidum Hinde, 1884		Dane's Dyke, Sewerby, Bridlington, Yorkshire, England, United Kingdom	Cretaceous, Chalk Group, Upper Chalk, Senonian, I. lingua zone	WRIGHT, Claud William, Collection [1933]	Presented
1276	NHMUK PI S 9960	1	hand specimen		12971	Wright Collection number	Stichophyma tumidum Hinde, 1884		Dane's Dyke, Sewerby, Bridlington, Yorkshire, England, United Kingdom	Cretaceous, Chalk Group, Upper Chalk, Senonian, I. lingua zone	WRIGHT, Claud William, Collection [1933]	Presented
1277	NHMUK PI S 9964	1	hand specimen		8062	Wright Collection number	Stichophyma tumidum Hinde, 1884		Dane's Dyke, Sewerby, Bridlington, Yorkshire, England, United Kingdom	Cretaceous, Chalk Group, Upper Chalk, Senonian, I. lingua zone	WRIGHT, Claud William, Collection [1933]	Presented
1278	NHMUK PI S 9587	1	hand specimen				Stichophyma tumidum Hinde, 1884		Flamborough, Yorkshire, England, United Kingdom	Cretaceous, Chalk Group, Upper Chalk, Senonian, A. quadratus zone	ROWE, Arthur Walter, Nov 1926	Purchased
1279	NHMUK PI S 10033	1	hand specimen		17822	Wright Collection number	Stichophyma tumidum Hinde, 1884		Dane's Dyke, Sewerby, Bridlington, Yorkshire, England, United Kingdom	Cretaceous, Chalk Group, Upper Chalk, Senonian, I. lingua zone	WRIGHT, Claud William, Collection [1933]	Presented
1280	NHMUK PI P 3559 (1)	1	hand specimen				Stichophyma tumidum Hinde, 1884		Flamborough, Yorkshire, England, United Kingdom	Cretaceous, Chalk Group, Upper Chalk	LEE, John Edward Collection, October 1885	Presented
1281	NHMUK PI P 3559 (2)	2	hand specimen				Stichophyma tumidum Hinde, 1884		Flamborough, Yorkshire, England, United Kingdom	Cretaceous, Chalk Group, Upper Chalk	LEE, John Edward Collection, October 1885	Presented
1282	NHMUK PI P 3559 (3)	1	hand specimen				Stichophyma tumidum Hinde, 1884		Flamborough, Yorkshire, England, United Kingdom	Cretaceous, Chalk Group, Upper Chalk	LEE, John Edward Collection, October 1885	Presented
1283	NHMUK PI P 3559 (4)	1	hand specimen				Stichophyma tumidum Hinde, 1884		Flamborough, Yorkshire, England, United Kingdom	Cretaceous, Chalk Group, Upper Chalk	LEE, John Edward Collection, October 1885	Presented
1284	NHMUK PI P 3559 (5)	1	hand specimen				Stichophyma tumidum Hinde, 1884		Flamborough, Yorkshire, England, United Kingdom	Cretaceous, Chalk Group, Upper Chalk	LEE, John Edward Collection, October 1885	Presented
1285	NHMUK PI P 3559 (6)	2	hand specimen				Stichophyma tumidum Hinde, 1884		Flamborough, Yorkshire, England, United Kingdom	Cretaceous, Chalk Group, Upper Chalk	LEE, John Edward Collection, October 1885	Presented
1286	NHMUK PI P 3559 (7)	2	hand specimen				Stichophyma tumidum Hinde, 1884		Flamborough, Yorkshire, England, United Kingdom	Cretaceous, Chalk Group, Upper Chalk	LEE, John Edward Collection, October 1885	Presented
1287	NHMUK PI P 3559 (8)	1	hand specimen				Stichophyma tumidum Hinde, 1884		Flamborough, Yorkshire, England, United Kingdom	Cretaceous, Chalk Group, Upper Chalk	LEE, John Edward Collection, October 1885	Presented
1288	NHMUK PI P 1229 (1)	4	hand specimen				Stichophyma tumidum Hinde, 1884		Flamborough, Yorkshire, England, United Kingdom	Cretaceous, Chalk Group, Upper Chalk	History unrecorded
1289	NHMUK PI P 1229 (2)	1	hand specimen				Stichophyma tumidum Hinde, 1884		Flamborough, Yorkshire, England, United Kingdom	Cretaceous, Chalk Group, Upper Chalk	History unrecorded
1290	NHMUK PI P 1229 (3)	2	hand specimen				Stichophyma tumidum Hinde, 1884		Flamborough, Yorkshire, England, United Kingdom	Cretaceous, Chalk Group, Upper Chalk	History unrecorded
1291	NHMUK PI P 1229 (4)	2	hand specimen				Stichophyma tumidum Hinde, 1884		Flamborough, Yorkshire, England, United Kingdom	Cretaceous, Chalk Group, Upper Chalk	History unrecorded
1292	NHMUK PI P 1229 (5)	2	hand specimen				Stichophyma tumidum Hinde, 1884		Flamborough, Yorkshire, England, United Kingdom	Cretaceous, Chalk Group, Upper Chalk	History unrecorded
1293	NHMUK PI P 1229 (6)	1	hand specimen				Stichophyma tumidum Hinde, 1884		Flamborough, Yorkshire, England, United Kingdom	Cretaceous, Chalk Group, Upper Chalk	History unrecorded
1294	NHMUK PI P 1229 (7)	3	hand specimen				Stichophyma tumidum Hinde, 1884		Flamborough, Yorkshire, England, United Kingdom	Cretaceous, Chalk Group, Upper Chalk	History unrecorded
1295	NHMUK PI P 1229 (8)	3	hand specimen				Stichophyma tumidum Hinde, 1884		Flamborough, Yorkshire, England, United Kingdom	Cretaceous, Chalk Group, Upper Chalk	History unrecorded
1296	NHMUK PI P 1229 (9)	2	hand specimen				Stichophyma tumidum Hinde, 1884		Flamborough, Yorkshire, England, United Kingdom	Cretaceous, Chalk Group, Upper Chalk	History unrecorded
1297	NHMUK PI P 1229 (10)	2	hand specimen				Stichophyma tumidum Hinde, 1884	Figured	Flamborough, Yorkshire, England, United Kingdom	Cretaceous, Chalk Group, Upper Chalk	History unrecorded		Hinde, G.J. 1884. Catalogue of the Fossil Sponges in the Geological Department of the British Museum (Natural History). With descriptions of new and little-known species. BM(NH), London, 248 pp. (on pl.5, fig. 4)
1298	NHMUK PI P 1229 (11)	2	hand specimen				Stichophyma tumidum Hinde, 1884		Flamborough, Yorkshire, England, United Kingdom	Cretaceous, Chalk Group, Upper Chalk	History unrecorded
1299	NHMUK PI P 1229 (12)	1	hand specimen				Stichophyma tumidum Hinde, 1884		Flamborough, Yorkshire, England, United Kingdom	Cretaceous, Chalk Group, Upper Chalk	History unrecorded
1300	NHMUK PI P 1229 (13)	2	hand specimen				Stichophyma tumidum Hinde, 1884	Figured	Flamborough, Yorkshire, England, United Kingdom	Cretaceous, Chalk Group, Upper Chalk	History unrecorded		Hinde, G.J. 1884. Catalogue of the Fossil Sponges in the Geological Department of the British Museum (Natural History). With descriptions of new and little-known species. BM(NH), London, 248 pp. (on pl.5, fig. 3)
1301	NHMUK PI P 1229 (14)	4	hand specimen		P 3064	BM(NH) number	Stichophyma tumidum Hinde, 1884		Flamborough, Yorkshire, England, United Kingdom	Cretaceous, Chalk Group, Upper Chalk	History unrecorded
1302	NHMUK PI P 1229 (15)	4	hand specimen				Stichophyma tumidum Hinde, 1884		Flamborough, Yorkshire, England, United Kingdom	Cretaceous, Chalk Group, Upper Chalk	History unrecorded
1303	NHMUK PI P 1229 (16)	1	hand specimen		P 1230	BM(NH) number	Stichophyma tumidum Hinde, 1884		Flamborough, Yorkshire, England, United Kingdom	Cretaceous, Chalk Group, Upper Chalk	History unrecorded
1304	NHMUK PI P 1229 (17)	4	hand specimen				Stichophyma tumidum Hinde, 1884		Flamborough, Yorkshire, England, United Kingdom	Cretaceous, Chalk Group, Upper Chalk	History unrecorded
1305	NHMUK PI P 1229 (18)	1	hand specimen				Stichophyma tumidum Hinde, 1884		Flamborough, Yorkshire, England, United Kingdom	Cretaceous, Chalk Group, Upper Chalk	History unrecorded
1306	NHMUK PI P 1230 (1)	1	hand specimen				Stichophyma tumidum Hinde, 1884		Flamborough, Yorkshire, England, United Kingdom	Cretaceous, Chalk Group, Upper Chalk	History unrecorded
1307	NHMUK PI P 1230 (2)	1	hand specimen				Stichophyma tumidum Hinde, 1884		Flamborough, Yorkshire, England, United Kingdom	Cretaceous, Chalk Group, Upper Chalk	History unrecorded
1308	NHMUK PI P 1230 (3)	2	hand specimen				Stichophyma tumidum Hinde, 1884		Flamborough, Yorkshire, England, United Kingdom	Cretaceous, Chalk Group, Upper Chalk	History unrecorded
1309	NHMUK PI P 1230 (4)	1	hand specimen				Stichophyma tumidum Hinde, 1884		Flamborough, Yorkshire, England, United Kingdom	Cretaceous, Chalk Group, Upper Chalk	History unrecorded
1310	NHMUK PI S 10717	1	hand specimen				Scytalia fastigiata (Lee, 1839)		Yorkshire; Sewerby Steps, Sewerby, Bridlington, Foreshore exposures to the SE of Sewerby Steps, Sewerby, NE of Bridlington, England, United Kingdom	Cretaceous, Late Cretaceous, Campanian. Flamborough Sponge Bed. local Offaster pilula Zone - Inoceramus lingua Zone	WARD, David, J., 19 Oct 1994	Donated
1311	NHMUK PI S 10718	1	hand specimen				Scytalia fastigiata (Lee, 1839)		Yorkshire; Sewerby Steps, Sewerby, Bridlington, Foreshore exposures to the SE of Sewerby Steps, Sewerby, NE of Bridlington, England, United Kingdom	Cretaceous, Late Cretaceous, Campanian. Flamborough Sponge Bed. local Offaster pilula Zone - Inoceramus lingua Zone	WARD, David, J., 19 Oct 1994	Donated
1312	NHMUK PI S 10719	4	hand specimen				Scytalia fastigiata (Lee, 1839)		Yorkshire; Sewerby Steps, Sewerby, Bridlington, Foreshore exposures to the SE of Sewerby Steps, Sewerby, NE of Bridlington, England, United Kingdom	Cretaceous, Late Cretaceous, Campanian. Flamborough Sponge Bed. local Offaster pilula Zone - Inoceramus lingua Zone	WARD, David, J., 19 Oct 1994	Donated
1313	NHMUK PI S 10720	1	hand specimen				Scytalia fastigiata (Lee, 1839)		Yorkshire; Sewerby Steps, Sewerby, Bridlington, Foreshore exposures to the SE of Sewerby Steps, Sewerby, NE of Bridlington, England, United Kingdom	Cretaceous, Late Cretaceous, Campanian. Flamborough Sponge Bed. local Offaster pilula Zone - Inoceramus lingua Zone	WARD, David, J., 19 Oct 1994	Donated
1314	NHMUK PI S 10721	1	hand specimen				Scytalia fastigiata (Lee, 1839)		Yorkshire; Sewerby Steps, Sewerby, Bridlington, Foreshore exposures to the SE of Sewerby Steps, Sewerby, NE of Bridlington, England, United Kingdom	Cretaceous, Late Cretaceous, Campanian. Flamborough Sponge Bed. local Offaster pilula Zone - Inoceramus lingua Zone	WARD, David, J., 19 Oct 1994	Donated
1315	NHMUK PI S 10722	1	hand specimen				Scytalia fastigiata (Lee, 1839)		Yorkshire; Sewerby Steps, Sewerby, Bridlington, Foreshore exposures to the SE of Sewerby Steps, Sewerby, NE of Bridlington, England, United Kingdom	Cretaceous, Late Cretaceous, Campanian. Flamborough Sponge Bed. local Offaster pilula Zone - Inoceramus lingua Zone	WARD, David, J., 19 Oct 1994	Donated
1316	NHMUK PI S 10723	1	hand specimen				Stichophyma Pomel, 1872		Yorkshire; Sewerby Steps, Sewerby, Bridlington, Foreshore exposures to the SE of Sewerby Steps, Sewerby, NE of Bridlington, England, United Kingdom	Cretaceous, Late Cretaceous, Campanian. Flamborough Sponge Bed. local Offaster pilula Zone - Inoceramus lingua Zone	WARD, David, J., 19 Oct 1994	Donated
1317	NHMUK PI S 10724	1	hand specimen				Stichophyma Pomel, 1872		Yorkshire; Sewerby Steps, Sewerby, Bridlington, Foreshore exposures to the SE of Sewerby Steps, Sewerby, NE of Bridlington, England, United Kingdom	Cretaceous, Late Cretaceous, Campanian. Flamborough Sponge Bed. local Offaster pilula Zone - Inoceramus lingua Zone	WARD, David, J., 19 Oct 1994	Donated
1318	NHMUK PI P 1241	1	hand specimen				Scytalia terebrata (Phillips, 1835)	Cited	Flamborough, Yorkshire, England, United Kingdom	Cretaceous, Chalk Group, Upper Chalk	History unrecorded		Schrammen, A. 1924. Die Kieselspongien der oberen Kreide von Nordwestdeutschland. III. und letzter Teil. Monographien zur Geologie und Palaeontologie, Serie 1, 2: 159 pp. (on p. 110)
1319	NHMUK PI P 3900	1	hand specimen				Scytalia terebrata (Phillips, 1835)		Flamborough, Yorkshire, England, United Kingdom	Cretaceous, Chalk Group, Upper Chalk	LEE, John Edward Collection, October 1885	Presented
1320	NHMUK PI S 9850	1	hand specimen				Scytalia terebrata (Phillips, 1835)		Flamborough, Yorkshire, England, United Kingdom	Cretaceous, Chalk Group, Upper Chalk, Senonian, A. quadratus zone	ROWE, Arthur Walter, Nov 1926	Purchased
1321	NHMUK PI S 9970	1	hand specimen				Scytalia terebrata (Phillips, 1835)		Dane's Dyke, Sewerby, Bridlington, Yorkshire, England, United Kingdom	Cretaceous, Chalk Group, Upper Chalk, Senonian, I. lingua zone	WRIGHT, Claud William, Collection [1933]	Presented
1322	NHMUK PI S 9971	1	hand specimen				Scytalia terebrata (Phillips, 1835)		Dane's Dyke, Sewerby, Bridlington, Yorkshire, England, United Kingdom	Cretaceous, Chalk Group, Upper Chalk, Senonian, I. lingua zone	WRIGHT, Claud William, Collection [1933]	Presented
1323	NHMUK PI S 7995	1	hand specimen				Scytalia terebrata (Phillips, 1835)		Flamborough, Yorkshire, England, United Kingdom	Cretaceous, Chalk Group, Upper Chalk, Senonian, A. quadratus zone	ROWE, Arthur Walter, Nov 1926	Purchased
1324	NHMUK PI S 7997	1	hand specimen				Scytalia terebrata (Phillips, 1835)		Flamborough, Yorkshire, England, United Kingdom	Cretaceous, Chalk Group, Upper Chalk	ROWE, Arthur Walter, Nov 1926	Purchased
1325	NHMUK PI S 9969	1	hand specimen		17812	Wright Collection number	Scytalia terebrata (Phillips, 1835)		Dane's Dyke, Sewerby, Bridlington, Yorkshire, England, United Kingdom	Cretaceous, Chalk Group, Upper Chalk, Senonian, I. lingua zone	WRIGHT, Claud William, Collection [1933]	Presented
1326	NHMUK PI S 6213	1	hand specimen		12977	Wright Collection number	Scytalia terebrata (Phillips, 1835)		Pit 2, Bessingby, Yorkshire, England, United Kingdom	Cretaceous, Chalk Group, Upper Chalk, Senonian, I. lingua zone	WRIGHT, Claud William & WRIGHT, E. V., Dec 1949	Donated
1327	NHMUK PI S 6184	1	hand specimen		12976	Wright Collection number	Scytalia terebrata (Phillips, 1835)		Dane's Dyke, Sewerby, Bridlington, Yorkshire, England, United Kingdom	Cretaceous, Chalk Group, Upper Chalk	WRIGHT, Claud William & WRIGHT, E. V., Dec 1949	Donated
1328	NHMUK PI S 6194	1	hand specimen		12978	Wright Collection number	Scytalia terebrata (Phillips, 1835)		Dane's Dyke, Sewerby, Bridlington, Yorkshire, England, United Kingdom	Cretaceous, Chalk Group, Upper Chalk	WRIGHT, Claud William & WRIGHT, E. V., Dec 1949	Donated
1329	NHMUK PI S 7994	1	hand specimen				Scytalia terebrata (Phillips, 1835)		Flamborough, Yorkshire, England, United Kingdom	Cretaceous, Chalk Group, Upper Chalk, Senonian, A. quadratus zone	ROWE, Arthur Walter, Nov 1926	Purchased
1330	NHMUK PI P 3566 (1)	1	hand specimen				Scytalia fastigiata (Lee, 1839)		Flamborough, Yorkshire, England, United Kingdom	Cretaceous, Chalk Group, Upper Chalk	LEE, John Edward Collection, October 1885	Presented
1331	NHMUK PI P 3566 (2)	1	hand specimen				Scytalia fastigiata (Lee, 1839)		Flamborough, Yorkshire, England, United Kingdom	Cretaceous, Chalk Group, Upper Chalk	LEE, John Edward Collection, October 1885	Presented
1332	NHMUK PI P 3566 (3)	1	hand specimen				Scytalia fastigiata (Lee, 1839)		Flamborough, Yorkshire, England, United Kingdom	Cretaceous, Chalk Group, Upper Chalk	LEE, John Edward Collection, October 1885	Presented
1333	NHMUK PI P 3566 (4)	1	hand specimen				Scytalia fastigiata (Lee, 1839)		Flamborough, Yorkshire, England, United Kingdom	Cretaceous, Chalk Group, Upper Chalk	LEE, John Edward Collection, October 1885	Presented
1334	NHMUK PI P 3566 (5)	1	hand specimen				Scytalia fastigiata (Lee, 1839)		Flamborough, Yorkshire, England, United Kingdom	Cretaceous, Chalk Group, Upper Chalk	LEE, John Edward Collection, October 1885	Presented
1335	NHMUK PI P 3566 (6)	1	hand specimen				Scytalia fastigiata (Lee, 1839)		Flamborough, Yorkshire, England, United Kingdom	Cretaceous, Chalk Group, Upper Chalk	LEE, John Edward Collection, October 1885	Presented
1336	NHMUK PI S 7998	1	hand specimen				Scytalia fastigiata (Lee, 1839)		Flamborough, Yorkshire, England, United Kingdom	Cretaceous, Chalk Group, Upper Chalk	ROWE, Arthur Walter, Nov 1926	Purchased
1337	NHMUK PI S 7996	1	hand specimen				Scytalia fastigiata (Lee, 1839)		Flamborough, Yorkshire, England, United Kingdom	Cretaceous, Chalk Group, Upper Chalk	ROWE, Arthur Walter, Nov 1926	Purchased
1338	NHMUK PI S 9951	1	hand specimen		12979	Wright Collection number	Scytalia fastigiata (Lee, 1839)		Dane's Dyke, Sewerby, Bridlington, Yorkshire, England, United Kingdom	Cretaceous, Chalk Group, Upper Chalk, Senonian, I. lingua zone	WRIGHT, Claud William, Collection [1933]	Presented
1339	NHMUK PI S 6187	1	hand specimen				Scytalia fastigiata (Lee, 1839)		Dane's Dyke, Sewerby, Bridlington, Yorkshire, England, United Kingdom	Cretaceous, Chalk Group, Upper Chalk, Senonian, I. lingua zone	WRIGHT, Claud William & WRIGHT, E. V., Dec 1949	Donated
1340	NHMUK PI S 4842	1	hand specimen				Scytalia fastigiata (Lee, 1839)		Dane's Dyke, Sewerby, Bridlington, Yorkshire, England, United Kingdom	Cretaceous, Chalk Group, Upper Chalk, Senonian, A. quadratus zone	WRIGHT, Claud William & WRIGHT, E. V.,, July, 1938	Donated
1341	NHMUK PI S 6197	1	hand specimen		12982	Wright Collection number	Scytalia fastigiata (Lee, 1839)		Dane's Dyke, Sewerby, Bridlington, Yorkshire, England, United Kingdom	Cretaceous, Chalk Group, Upper Chalk, Senonian, I. lingua zone	WRIGHT, Claud William & WRIGHT, E. V., Dec 1949	Donated
1342	NHMUK PI S 6182	1	hand specimen		17813	Wright Collection number	Scytalia fastigiata (Lee, 1839)		Dane's Dyke, Sewerby, Bridlington, Yorkshire, England, United Kingdom	Cretaceous, Chalk Group, Upper Chalk, Senonian, I. lingua zone	WRIGHT, Claud William & WRIGHT, E. V., Dec 1949	Donated
1343	NHMUK PI P 1242 (1)	1	hand specimen				Scytalia fastigiata (Lee, 1839)		Flamborough, Yorkshire, England, United Kingdom	Cretaceous, Chalk Group, Upper Chalk	History unrecorded
1344	NHMUK PI P 1242 (2)	1	hand specimen				Scytalia fastigiata (Lee, 1839)		Flamborough, Yorkshire, England, United Kingdom	Cretaceous, Chalk Group, Upper Chalk	History unrecorded
1345	NHMUK PI P 1242 (3)	1	hand specimen				Scytalia fastigiata (Lee, 1839)		Flamborough, Yorkshire, England, United Kingdom	Cretaceous, Chalk Group, Upper Chalk	History unrecorded
1346	NHMUK PI S 9569	1	hand specimen				Scytalia fastigiata (Lee, 1839)		Sewerby, Bridlington, Yorkshire, England, United Kingdom	Cretaceous, Chalk Group, Upper Chalk, Senonian, A. quadratus zone	ROWE, Arthur Walter, Nov 1926	Purchased
1347	NHMUK PI S 9972	1	hand specimen		12983	Wright Collection number	Scytalia fastigiata (Lee, 1839)		Dane's Dyke, Sewerby, Bridlington, Yorkshire, England, United Kingdom	Cretaceous, Chalk Group, Upper Chalk, Senonian, I. lingua zone	WRIGHT, Claud William, Collection [1933]	Presented
1348	NHMUK PI S 10027	1	hand specimen		12995	Wright Collection number	Scytalia fastigiata (Lee, 1839)		Dane's Dyke, Sewerby, Bridlington, Yorkshire, England, United Kingdom	Cretaceous, Chalk Group, Upper Chalk, Senonian, I. lingua zone	WRIGHT, Claud William, Collection [1933]	Presented
1349	NHMUK PI P 1242 (4)	1	hand specimen				Scytalia fastigiata (Lee, 1839)	Figured	Flamborough, Yorkshire, England, United Kingdom	Cretaceous, Chalk Group, Upper Chalk, Senonian	History unrecorded		Hinde, G.J. 1884. Catalogue of the Fossil Sponges in the Geological Department of the British Museum (Natural History). With descriptions of new and little-known species. BM(NH), London, 248 pp. (on pl.6, fig. 3 as Scytalia)
1350	NHMUK PI P 1242 (5)	1	hand specimen				Scytalia fastigiata (Lee, 1839)		Flamborough, Yorkshire, England, United Kingdom	Cretaceous, Chalk Group, Upper Chalk	History unrecorded
1351	NHMUK PI P 1242 (6)	1	hand specimen				Scytalia fastigiata (Lee, 1839)		Flamborough, Yorkshire, England, United Kingdom	Cretaceous, Chalk Group, Upper Chalk	History unrecorded
1352	NHMUK PI P 1242 (7)	1	hand specimen				Scytalia fastigiata (Lee, 1839)		Flamborough, Yorkshire, England, United Kingdom	Cretaceous, Chalk Group, Upper Chalk	History unrecorded
1353	NHMUK PI P 1242 (8)	1	hand specimen				Scytalia fastigiata (Lee, 1839)		Flamborough, Yorkshire, England, United Kingdom	Cretaceous, Chalk Group, Upper Chalk	History unrecorded
1354	NHMUK PI P 1242 (9)	1	hand specimen				Scytalia fastigiata (Lee, 1839)		Flamborough, Yorkshire, England, United Kingdom	Cretaceous, Chalk Group, Upper Chalk	History unrecorded
1355	NHMUK PI P 4183 (1)	1	hand specimen				Carterella cylindrica Zittel, 1878		Warminster, Wiltshire, England, United Kingdom	Cretaceous, Upper Greensand	BABER, Miss, May 1889	Purchased
1356	NHMUK PI P 4183 (2)	1	hand specimen				Carterella cylindrica Zittel, 1878		Warminster, Wiltshire, England, United Kingdom	Cretaceous, Upper Greensand	BABER, Miss, May 1889	Purchased
1357	NHMUK PI P 2244 (1)	1	hand specimen				Carterella cylindrica Zittel, 1878		Warminster, Wiltshire, England, United Kingdom	Cretaceous, Upper Greensand	History unrecorded
1358	NHMUK PI P 2244 (2)	1	hand specimen				Carterella cylindrica Zittel, 1878		Warminster, Wiltshire, England, United Kingdom	Cretaceous, Upper Greensand	History unrecorded
1359	NHMUK PI S 9115	2	hand specimen				Nematinion Hinde, 1884		Branscombe, Seaton, Devon, England, United Kingdom	Cretaceous, Cenomanian, Basement Bed	HINDE, Dr. George Jennings, 1918	Presented
1360	NHMUK PI P 3520	3	hand specimen				Nematinion calyculum Hinde, 1884		Warminster, Wiltshire, England, United Kingdom	Cretaceous, Upper Greensand	LEE, John Edward Collection, October 1885	Presented
1361	NHMUK PI P 1299	2	hand specimen				Nematinion calyculum Hinde, 1884		Warminster, Wiltshire, England, United Kingdom	Cretaceous, Upper Greensand	CUNNINGTON Collection	Purchased
1362	NHMUK PI P 1298 (1)	4	hand specimen				Nematinion calyculum Hinde, 1884		Warminster, Wiltshire, England, United Kingdom	Cretaceous, Upper Greensand	History unrecorded
1363	NHMUK PI P 1298 (1) $1	1	thin section				Nematinion calyculum Hinde, 1884		Warminster, Wiltshire, England, United Kingdom	Cretaceous, Upper Greensand	History unrecorded
1364	NHMUK PI P 1298 (2)	1	hand specimen				Nematinion calyculum Hinde, 1884		Warminster, Wiltshire, England, United Kingdom	Cretaceous, Upper Greensand	History unrecorded
1365	NHMUK PI P 1298 (3)	2	hand specimen				Nematinion calyculum Hinde, 1884		Warminster, Wiltshire, England, United Kingdom	Cretaceous, Upper Greensand	History unrecorded
1366	NHMUK PI P 1298 (4)	9	hand specimen				Nematinion calyculum Hinde, 1884		Warminster, Wiltshire, England, United Kingdom	Cretaceous, Upper Greensand	History unrecorded
1367	NHMUK PI P 1298 (5)	1	hand specimen				Nematinion calyculum Hinde, 1884		Warminster, Wiltshire, England, United Kingdom	Cretaceous, Upper Greensand	History unrecorded
1368	NHMUK PI P 1298 (6)	1	hand specimen				Nematinion calyculum Hinde, 1884		Warminster, Wiltshire, England, United Kingdom	Cretaceous, Upper Greensand	History unrecorded
1369	NHMUK PI P 1298 (7)	1	hand specimen				Nematinion calyculum Hinde, 1884		Warminster, Wiltshire, England, United Kingdom	Cretaceous, Upper Greensand	History unrecorded
1370	NHMUK PI P 1298 (8)	1	hand specimen				Nematinion calyculum Hinde, 1884		Warminster, Wiltshire, England, United Kingdom	Cretaceous, Upper Greensand	History unrecorded
1371	NHMUK PI P 1298 (9)	1	hand specimen				Nematinion calyculum Hinde, 1884		Warminster, Wiltshire, England, United Kingdom	Cretaceous, Upper Greensand	History unrecorded
1372	NHMUK PI P 1298 (10)	2	hand specimen				Nematinion calyculum Hinde, 1884		Warminster, Wiltshire, England, United Kingdom	Cretaceous, Upper Greensand	History unrecorded
1373	NHMUK PI P 1298 (11)	1	hand specimen				Nematinion calyculum Hinde, 1884	Figured	Warminster, Wiltshire, England, United Kingdom	Cretaceous, Upper Greensand	History unrecorded		Hinde, G.J. 1884. Catalogue of the Fossil Sponges in the Geological Department of the British Museum (Natural History). With descriptions of new and little-known species. BM(NH), London, 248 pp. (on pl.10, figs. 1, 1b)
1374	NHMUK PI P 1298 (12)	3	hand specimen				Nematinion calyculum Hinde, 1884	Figured	Warminster, Wiltshire, England, United Kingdom	Cretaceous, Upper Greensand	History unrecorded		Hinde, G.J. 1884. Catalogue of the Fossil Sponges in the Geological Department of the British Museum (Natural History). With descriptions of new and little-known species. BM(NH), London, 248 pp. (on pl.10, figs. 1a, 1c)
1375	NHMUK PI P 1298 (13)	2	hand specimen				Nematinion calyculum Hinde, 1884		Warminster, Wiltshire, England, United Kingdom	Cretaceous, Upper Greensand	History unrecorded
1376	NHMUK PI S 9114	1	hand specimen				Nematinion Hinde, 1884		Manyards, Seaton, Devon, England, United Kingdom	Cretaceous, Cenomanian, Basement Bed	HINDE, Dr. George Jennings, 1918	Presented
1377	NHMUK PI P 1268 (1)	4	hand specimen				Pachypoterion compactum Hinde, 1884		Warminster, Wiltshire, England, United Kingdom	Cretaceous, Upper Greensand	History unrecorded
1378	NHMUK PI P 1268 (2)	2	hand specimen				Pachypoterion compactum Hinde, 1884		Warminster, Wiltshire, England, United Kingdom	Cretaceous, Upper Greensand	History unrecorded
1379	NHMUK PI P 1268 (3)	2	hand specimen				Pachypoterion compactum Hinde, 1884		Warminster, Wiltshire, England, United Kingdom	Cretaceous, Upper Greensand	History unrecorded
1380	NHMUK PI P 1268 (4)	2	hand specimen				Pachypoterion compactum Hinde, 1884		Warminster, Wiltshire, England, United Kingdom	Cretaceous, Upper Greensand	History unrecorded
1381	NHMUK PI P 1268 (1) $1	1	thin section				Pachypoterion compactum Hinde, 1884		Warminster, Wiltshire, England, United Kingdom	Cretaceous, Upper Greensand	History unrecorded
1382	NHMUK PI P 1268 (5)	1	hand specimen				Pachypoterion compactum Hinde, 1884		Warminster, Wiltshire, England, United Kingdom	Cretaceous, Upper Greensand	History unrecorded
1383	NHMUK PI P 3525 (1)	1	hand specimen				Pachypoterion compactum Hinde, 1884		Warminster, Wiltshire, England, United Kingdom	Cretaceous, Upper Greensand	LEE, John Edward Collection, October 1885	Presented
1384	NHMUK PI P 3525 (2)	5	hand specimen				Pachypoterion compactum Hinde, 1884		Warminster, Wiltshire, England, United Kingdom	Cretaceous, Upper Greensand	LEE, John Edward Collection, October 1885	Presented
1385	NHMUK PI P 3525 (3)	2	hand specimen				Pachypoterion compactum Hinde, 1884		Warminster, Wiltshire, England, United Kingdom	Cretaceous, Upper Greensand	LEE, John Edward Collection, October 1885	Presented
1386	NHMUK PI P 3525 (4)	2	hand specimen				Pachypoterion compactum Hinde, 1884		Warminster, Wiltshire, England, United Kingdom	Cretaceous, Upper Greensand	LEE, John Edward Collection, October 1885	Presented
1387	NHMUK PI P 3525 (5)	3	hand specimen				Pachypoterion compactum Hinde, 1884		Warminster, Wiltshire, England, United Kingdom	Cretaceous, Upper Greensand	LEE, John Edward Collection, October 1885	Presented
1388	NHMUK PI P 3525 (6)	4	hand specimen				Pachypoterion compactum Hinde, 1884		Warminster, Wiltshire, England, United Kingdom	Cretaceous, Upper Greensand	LEE, John Edward Collection, October 1885	Presented
1389	NHMUK PI P 3525 (7)	5	hand specimen				Pachypoterion compactum Hinde, 1884		Warminster, Wiltshire, England, United Kingdom	Cretaceous, Upper Greensand	LEE, John Edward Collection, October 1885	Presented
1390	NHMUK PI P 2240 (1)	2	hand specimen				Pachypoterion robustum Hinde, 1884		Warminster, Wiltshire, England, United Kingdom	Cretaceous, Upper Greensand	History unrecorded
1391	NHMUK PI S 5108	1	hand specimen				Pachypoterion robustum Hinde, 1884		Tinhead, Westbury, Wiltshire, England, United Kingdom	Cretaceous, Upper Greensand	STEBBING, W. P. D., Apr 1946
1392	NHMUK PI P 3208	1	hand specimen				Pachypoterion robustum Hinde, 1884		Warminster, Wiltshire, England, United Kingdom	Cretaceous, Upper Greensand	History unrecorded
1393	NHMUK PI S 5485	1	hand specimen				Pachypoterion robustum Hinde, 1884		Warminster, Wiltshire, England, United Kingdom	Cretaceous, Upper Greensand	TURNER, Capt. C. H., Oct 1947	Donated
1394	NHMUK PI P 1272 (1)	1	hand specimen				Pachypoterion robustum Hinde, 1884		Folkestone, Kent, England, United Kingdom	Cretaceous, Upper Greensand	GARDNER, J. S., 1880s	Purchased
1395	NHMUK PI P 1272 (2)	1	hand specimen				Pachypoterion robustum Hinde, 1884		Folkestone, Kent, England, United Kingdom	Cretaceous, Upper Greensand	History unrecorded
1396	NHMUK PI S 7877	2	hand specimen				Pachypoterion robustum Hinde, 1884		Folkestone, Kent, England, United Kingdom	Cretaceous, Upper Greensand	ROWE, Arthur Walter, Nov 1926	Purchased
1397	NHMUK PI P 1276	1	hand specimen				Pachypoterion robustum Hinde, 1884		Dover, Kent, England, United Kingdom	Cretaceous, Upper Greensand	History unrecorded
1398	NHMUK PI P 1275 (1)	1	hand specimen				Pachypoterion robustum Hinde, 1884		Wiltshire, England, United Kingdom	Cretaceous, Upper Greensand	KNIGHT Collection
1399	NHMUK PI P 1275 (2)	1	hand specimen				Pachypoterion robustum Hinde, 1884		Pewsey, Wiltshire, England, United Kingdom	Cretaceous, Upper Greensand	History unrecorded
1400	NHMUK PI P 1275 (3)	3	hand specimen				Pachypoterion robustum Hinde, 1884		Wiltshire, England, United Kingdom	Cretaceous, Upper Greensand	KNIGHT Collection
1401	NHMUK PI P 1275 (4)	1	hand specimen				Pachypoterion robustum Hinde, 1884		Pewsey, Wiltshire, England, United Kingdom	Cretaceous, Upper Greensand	History unrecorded
1402	NHMUK PI P 1275 (5)	1	hand specimen				Pachypoterion robustum Hinde, 1884		Pewsey, Wiltshire, England, United Kingdom	Cretaceous, Upper Greensand	History unrecorded
1403	NHMUK PI P 1275 (6)	1	hand specimen				Pachypoterion robustum Hinde, 1884		Pewsey, Wiltshire, England, United Kingdom	Cretaceous, Upper Greensand	History unrecorded
1404	NHMUK PI P 1273 (1)	1	hand specimen				Pachypoterion robustum Hinde, 1884		Warminster, Wiltshire, England, United Kingdom	Cretaceous, Upper Greensand	History unrecorded
1405	NHMUK PI P 1273 (2)	2	hand specimen				Pachypoterion robustum Hinde, 1884		Warminster, Wiltshire, England, United Kingdom	Cretaceous, Upper Greensand	History unrecorded
1406	NHMUK PI P 1273 (3)	1	hand specimen				Pachypoterion robustum Hinde, 1884		Warminster, Wiltshire, England, United Kingdom	Cretaceous, Upper Greensand	History unrecorded
1407	NHMUK PI P 1273 (4)	1	hand specimen				Pachypoterion robustum Hinde, 1884		Warminster, Wiltshire, England, United Kingdom	Cretaceous, Upper Greensand	History unrecorded
1408	NHMUK PI P 1273 (5)	3	hand specimen				Pachypoterion robustum Hinde, 1884		Warminster, Wiltshire, England, United Kingdom	Cretaceous, Upper Greensand	History unrecorded
1409	NHMUK PI P 1273 (6)	1	hand specimen				Pachypoterion robustum Hinde, 1884		Warminster, Wiltshire, England, United Kingdom	Cretaceous, Upper Greensand	History unrecorded
1410	NHMUK PI P 2240 (2)	1	hand specimen				Pachypoterion robustum Hinde, 1884		Warminster, Wiltshire, England, United Kingdom	Cretaceous, Upper Greensand	GARDNER, J. S., 1884	Purchased
1411	NHMUK PI P 2240 (3)	2	hand specimen				Pachypoterion robustum Hinde, 1884		Warminster, Wiltshire, England, United Kingdom	Cretaceous, Upper Greensand	GARDNER, J. S., 1884	Purchased
1412	NHMUK PI P 2240 (4)	1	hand specimen				Pachypoterion robustum Hinde, 1884		Warminster, Wiltshire, England, United Kingdom	Cretaceous, Upper Greensand	History unrecorded
1413	NHMUK PI P 3030	1	hand specimen				Pachypoterion compactum Hinde, 1884	Figured	Warminster, Wiltshire, England, United Kingdom	Cretaceous, Upper Greensand	SMITH, William, 1816-18	Purchased	Smith, W. 1816-1819. Strata identified by Organized Fossils, containing prints on cloured paper of the most characteristic specimens in each Stratum. London, 32 pp. (on pl. 5)	Hinde, G.J. 1882. Notes on Fossil Calcispongiae, with Descriptions of New Species. Annals and Magazine of Natural History, Series 5, 10: 185-206. (on pl. 9, figs. 3a, 3b)
1414	NHMUK PI S 3817	1	hand specimen				Pachypoterion compactum Hinde, 1884		Warminster, Wiltshire, England, United Kingdom	Cretaceous, Upper Greensand	HACKNEY & NEW COLLEGE, Feb 1935
1415	NHMUK PI P 1273 (7)	1	hand specimen				Pachypoterion robustum Hinde, 1884		Warminster, Wiltshire, England, United Kingdom	Cretaceous, Upper Greensand	History unrecorded
1416	NHMUK PI S 10725	1	hand specimen				Pachypoterion robustum Hinde, 1884		Wiltshire, England, United Kingdom	Cretaceous, Upper Greensand	History unrecorded
1417	NHMUK PI P 1275 (7)	1	hand specimen				Pachypoterion robustum Hinde, 1884	Figured	Pewsey, Wiltshire, England, United Kingdom	Cretaceous, Upper Greensand	History unrecorded		Hinde, G.J. 1884. Catalogue of the Fossil Sponges in the Geological Department of the British Museum (Natural History). With descriptions of new and little-known species. BM(NH), London, 248 pp. (on pl.9, fig. 2b)
1418	NHMUK PI P 2240 (5)	1	hand specimen				Pachypoterion robustum Hinde, 1884		Warminster, Wiltshire, England, United Kingdom	Cretaceous, Upper Greensand	History unrecorded
1419	NHMUK PI P 2240 (6)	1	hand specimen				Pachypoterion robustum Hinde, 1884		Warminster, Wiltshire, England, United Kingdom	Cretaceous, Upper Greensand	History unrecorded
1420	NHMUK PI P 1271 (1)	2	hand specimen				Pachypoterion robustum Hinde, 1884	Figured	Pewsey, Wiltshire, England, United Kingdom	Cretaceous, Upper Greensand	History unrecorded		Hinde, G.J. 1884. Catalogue of the Fossil Sponges in the Geological Department of the British Museum (Natural History). With descriptions of new and little-known species. BM(NH), London, 248 pp. (on pl.9, figs. 2a, 2c)
1421	NHMUK PI P 1271 (2)	2	hand specimen				Pachypoterion robustum Hinde, 1884	Figured	Pewsey, Wiltshire, England, United Kingdom	Cretaceous, Upper Greensand	History unrecorded		Hinde, G.J. 1884. Catalogue of the Fossil Sponges in the Geological Department of the British Museum (Natural History). With descriptions of new and little-known species. BM(NH), London, 248 pp. (on pl.9, fig. 2)
1422	NHMUK PI P 1271 (3)	1	hand specimen				Pachypoterion robustum Hinde, 1884		Pewsey, Wiltshire, England, United Kingdom	Cretaceous, Upper Greensand	BRIGHT Collection
1423	NHMUK PI P 1252 (1)	2	hand specimen				Holodictyon capitatum Hinde, 1884	Figured	Warminster, Wiltshire, England, United Kingdom	Cretaceous, Upper Greensand	History unrecorded		Hinde, G.J. 1884. Catalogue of the Fossil Sponges in the Geological Department of the British Museum (Natural History). With descriptions of new and little-known species. BM(NH), London, 248 pp. (on pl.7, figs. 3a, 3b)
1424	NHMUK PI P 1252 (2)	1	hand specimen				Holodictyon capitatum Hinde, 1884	Figured	Warminster, Wiltshire, England, United Kingdom	Cretaceous, Upper Greensand	History unrecorded		Hinde, G.J. 1884. Catalogue of the Fossil Sponges in the Geological Department of the British Museum (Natural History). With descriptions of new and little-known species. BM(NH), London, 248 pp. (on pl.7, figs. 3)
1425	NHMUK PI P 1252 (3)	1	hand specimen				Holodictyon capitatum Hinde, 1884	Figured	Warminster, Wiltshire, England, United Kingdom	Cretaceous, Upper Greensand	History unrecorded		Hinde, G.J. 1884. Catalogue of the Fossil Sponges in the Geological Department of the British Museum (Natural History). With descriptions of new and little-known species. BM(NH), London, 248 pp. (on pl.7, figs. 3)
1426	NHMUK PI P 1252 (4)	1	hand specimen				Holodictyon capitatum Hinde, 1884	Figured	Warminster, Wiltshire, England, United Kingdom	Cretaceous, Upper Greensand	History unrecorded		Hinde, G.J. 1884. Catalogue of the Fossil Sponges in the Geological Department of the British Museum (Natural History). With descriptions of new and little-known species. BM(NH), London, 248 pp. (on pl.7, figs. 3)
1427	NHMUK PI P 1252 (5)	2	hand specimen				Holodictyon capitatum Hinde, 1884	Figured	Warminster, Wiltshire, England, United Kingdom	Cretaceous, Upper Greensand	History unrecorded		Hinde, G.J. 1884. Catalogue of the Fossil Sponges in the Geological Department of the British Museum (Natural History). With descriptions of new and little-known species. BM(NH), London, 248 pp. (on pl.7, figs. 3)
1428	NHMUK PI S 9948	1	hand specimen		596	Wright Collection number	Eulespongia texta (Roemer, 1864)		Yorkshire, England, United Kingdom	Cretaceous, Chalk Group, Upper Chalk, Senonian	WRIGHT, Claud William, Collection [1933]	Presented
1429	NHMUK PI S 9950	1	hand specimen		17822	Wright Collection number	Eulespongia texta (Roemer, 1864)		Dane's Dyke, Sewerby, Bridlington, Yorkshire, England, United Kingdom	Cretaceous, Chalk Group, Upper Chalk, Senonian, I. lingua zone	WRIGHT, Claud William, Collection [1933]	Presented
1430	NHMUK PI S 9949	1	hand specimen		573	Wright Collection number	Eulespongia texta (Roemer, 1864)		Yorkshire, England, United Kingdom	Cretaceous, Chalk Group, Upper Chalk, Senonian	WRIGHT, Claud William, Collection [1933]	Presented
1431	NHMUK PI P 3560 (1)	3	hand specimen				Eulespongia texta (Roemer, 1864)		Flamborough, Yorkshire, England, United Kingdom	Cretaceous, Chalk Group, Upper Chalk	LEE, John Edward Collection, October 1885	Presented
1432	NHMUK PI P 3560 (2)	4	hand specimen				Eulespongia texta (Roemer, 1864)		Flamborough, Yorkshire, England, United Kingdom	Cretaceous, Chalk Group, Upper Chalk	LEE, John Edward Collection, October 1885	Presented
1433	NHMUK PI P 3560 (3)	1	hand specimen				Eulespongia texta (Roemer, 1864)		Flamborough, Yorkshire, England, United Kingdom	Cretaceous, Chalk Group, Upper Chalk	LEE, John Edward Collection, October 1885	Presented
1434	NHMUK PI P 1318	3	hand specimen				Eulespongia texta (Roemer, 1864)		Flamborough, Yorkshire, England, United Kingdom	Cretaceous, Chalk Group, Upper Chalk	BOWERBANK, James Scott, 1865	Purchased
1435	NHMUK PI P 1317 (1)	4	hand specimen				Eulespongia texta (Roemer, 1864)		Flamborough, Yorkshire, England, United Kingdom	Cretaceous, Chalk Group, Upper Chalk	History unrecorded
1436	NHMUK PI P 3120	2	hand specimen				Eulespongia texta (Roemer, 1864)		South of England	Cretaceous, Chalk Group, Upper Chalk	History unrecorded
1437	NHMUK PI P 1317 (2)	1	hand specimen				Eulespongia texta (Roemer, 1864)		Flamborough, Yorkshire, England, United Kingdom	Cretaceous, Chalk Group, Upper Chalk	History unrecorded
1438	NHMUK PI P 1317 (3)	3	hand specimen				Eulespongia texta (Roemer, 1864)	Figured	Flamborough, Yorkshire, England, United Kingdom	Cretaceous, Chalk Group, Upper Chalk, Senonian	History unrecorded		Hinde, G.J. 1884. Catalogue of the Fossil Sponges in the Geological Department of the British Museum (Natural History). With descriptions of new and little-known species. BM(NH), London, 248 pp. (on pl.7, figs. 3)
1439	NHMUK PI P 1317 (4)	2	hand specimen				Eulespongia texta (Roemer, 1864)	Figured	Flamborough, Yorkshire, England, United Kingdom	Cretaceous, Chalk Group, Upper Chalk, Senonian	History unrecorded		Hinde, G.J. 1884. Catalogue of the Fossil Sponges in the Geological Department of the British Museum (Natural History). With descriptions of new and little-known species. BM(NH), London, 248 pp. (on pl.10, fig. 3)
1440	NHMUK PI P 1251 (1)	1	hand specimen				Pachinion scriptum (Roemer, 1864)		Flamborough, Yorkshire, England, United Kingdom	Cretaceous, Chalk Group, Upper Chalk	History unrecorded
1441	NHMUK PI P 1251 (2)	1	hand specimen				Pachinion scriptum (Roemer, 1864)		Flamborough, Yorkshire, England, United Kingdom	Cretaceous, Chalk Group, Upper Chalk	History unrecorded
1442	NHMUK PI P 1251 (3)	1	hand specimen				Pachinion scriptum (Roemer, 1864)		Flamborough, Yorkshire, England, United Kingdom	Cretaceous, Chalk Group, Upper Chalk	History unrecorded
1443	NHMUK PI P 1251 (4)	2	hand specimen				Pachinion scriptum (Roemer, 1864)		Flamborough, Yorkshire, England, United Kingdom	Cretaceous, Chalk Group, Upper Chalk	History unrecorded
1444	NHMUK PI P 1251 (5)	1	hand specimen				Pachinion scriptum (Roemer, 1864)		Flamborough, Yorkshire, England, United Kingdom	Cretaceous, Chalk Group, Upper Chalk	History unrecorded
1445	NHMUK PI P 1251 (6)	3	hand specimen				Pachinion scriptum (Roemer, 1864)		Flamborough, Yorkshire, England, United Kingdom	Cretaceous, Chalk Group, Upper Chalk	History unrecorded
1446	NHMUK PI P 1251 (7)	1	hand specimen				Pachinion scriptum (Roemer, 1864)		Flamborough, Yorkshire, England, United Kingdom	Cretaceous, Chalk Group, Upper Chalk	History unrecorded
1447	NHMUK PI P 1251 (8)	2	hand specimen				Pachinion scriptum (Roemer, 1864)		Flamborough, Yorkshire, England, United Kingdom	Cretaceous, Chalk Group, Upper Chalk	History unrecorded
1448	NHMUK PI P 1251 (9)	4	hand specimen				Pachinion scriptum (Roemer, 1864)		Flamborough, Yorkshire, England, United Kingdom	Cretaceous, Chalk Group, Upper Chalk	History unrecorded
1449	NHMUK PI P 1251 (10)	3	hand specimen				Pachinion scriptum (Roemer, 1864)		Flamborough, Yorkshire, England, United Kingdom	Cretaceous, Chalk Group, Upper Chalk	History unrecorded
1450	NHMUK PI P 1251 (11)	1	hand specimen				Pachinion scriptum (Roemer, 1864)		Flamborough, Yorkshire, England, United Kingdom	Cretaceous, Chalk Group, Upper Chalk	History unrecorded
1451	NHMUK PI P 1251 (12)	1	hand specimen				Pachinion scriptum (Roemer, 1864)		Flamborough, Yorkshire, England, United Kingdom	Cretaceous, Chalk Group, Upper Chalk	History unrecorded
1452	NHMUK PI P 1251 (13)	1	hand specimen				Pachinion scriptum (Roemer, 1864)		Flamborough, Yorkshire, England, United Kingdom	Cretaceous, Chalk Group, Upper Chalk	History unrecorded
1453	NHMUK PI P 1251 (14)	1	hand specimen				Pachinion scriptum (Roemer, 1864)		Flamborough, Yorkshire, England, United Kingdom	Cretaceous, Chalk Group, Upper Chalk	History unrecorded
1454	NHMUK PI P 1251 (15)	4	hand specimen				Pachinion scriptum (Roemer, 1864)	Figured	Flamborough, Yorkshire, England, United Kingdom	Cretaceous, Chalk Group, Upper Chalk	History unrecorded		Hinde, G.J. 1884. Catalogue of the Fossil Sponges in the Geological Department of the British Museum (Natural History). With descriptions of new and little-known species. BM(NH), London, 248 pp. (on pl.7, fig. 1a)
1455	NHMUK PI P 1251 (1) $1	1	thin section				Pachinion scriptum (Roemer, 1864)	Figured	Flamborough, Yorkshire, England, United Kingdom	Cretaceous, Chalk Group, Upper Chalk	History unrecorded		Hinde, G.J. 1884. Catalogue of the Fossil Sponges in the Geological Department of the British Museum (Natural History). With descriptions of new and little-known species. BM(NH), London, 248 pp. (on pl.7, fig. 1a)
1456	NHMUK PI P 1251 (16)	15	hand specimen				Pachinion scriptum (Roemer, 1864)		Flamborough, Yorkshire, England, United Kingdom	Cretaceous, Chalk Group, Upper Chalk	History unrecorded
1457	NHMUK PI P 1251 (17)	1	hand specimen				Pachinion scriptum (Roemer, 1864)		Flamborough, Yorkshire, England, United Kingdom	Cretaceous, Chalk Group, Upper Chalk	History unrecorded
1458	NHMUK PI P 1251 (18)	1	hand specimen				Pachinion scriptum (Roemer, 1864)		Flamborough, Yorkshire, England, United Kingdom	Cretaceous, Chalk Group, Upper Chalk	History unrecorded
1459	NHMUK PI P 1251 (19)	4	hand specimen				Pachinion scriptum (Roemer, 1864)	Figured	Flamborough, Yorkshire, England, United Kingdom	Cretaceous, Chalk Group, Upper Chalk	History unrecorded		Hinde, G.J. 1884. Catalogue of the Fossil Sponges in the Geological Department of the British Museum (Natural History). With descriptions of new and little-known species. BM(NH), London, 248 pp. (on pl.7, fig. 1)
1460	NHMUK PI P 1251 (20)	3	hand specimen				Pachinion scriptum (Roemer, 1864)		Flamborough, Yorkshire, England, United Kingdom	Cretaceous, Chalk Group, Upper Chalk	History unrecorded
1461	NHMUK PI P 3557 (1)	1	hand specimen				Pachinion scriptum (Roemer, 1864)		Flamborough, Yorkshire, England, United Kingdom	Cretaceous, Chalk Group, Upper Chalk	LEE, John Edward Collection, October 1885	Presented
1462	NHMUK PI P 3557 (2)	1	hand specimen				Pachinion scriptum (Roemer, 1864)		Flamborough, Yorkshire, England, United Kingdom	Cretaceous, Chalk Group, Upper Chalk	LEE, John Edward Collection, October 1885	Presented
1463	NHMUK PI P 3557 (3)	2	hand specimen				Pachinion scriptum (Roemer, 1864)		Flamborough, Yorkshire, England, United Kingdom	Cretaceous, Chalk Group, Upper Chalk	LEE, John Edward Collection, October 1885	Presented
1464	NHMUK PI P 1348 (5)	1	hand specimen				Pachinion scriptum (Roemer, 1864)		Flamborough, Yorkshire, England, United Kingdom	Cretaceous, Chalk Group, Upper Chalk	History unrecorded
1465	NHMUK PI P 3557 (4)	1	hand specimen				Pachinion scriptum (Roemer, 1864)		Flamborough, Yorkshire, England, United Kingdom	Cretaceous, Chalk Group, Upper Chalk	History unrecorded
1466	NHMUK PI P 3557 (5)	3	hand specimen				Pachinion scriptum (Roemer, 1864)		Flamborough, Yorkshire, England, United Kingdom	Cretaceous, Chalk Group, Upper Chalk	History unrecorded
1467	NHMUK PI P 3557 (6)	2	hand specimen				Pachinion scriptum (Roemer, 1864)		Flamborough, Yorkshire, England, United Kingdom	Cretaceous, Chalk Group, Upper Chalk	LEE, John Edward Collection, October 1885	Presented
1468	NHMUK PI P 3557 (7)	1	hand specimen				Pachinion scriptum (Roemer, 1864)		Flamborough, Yorkshire, England, United Kingdom	Cretaceous, Chalk Group, Upper Chalk	LEE, John Edward Collection, October 1885	Presented
1469	NHMUK PI P 3557 (8)	2	hand specimen				Pachinion scriptum (Roemer, 1864)		Flamborough, Yorkshire, England, United Kingdom	Cretaceous, Chalk Group, Upper Chalk	LEE, John Edward Collection, October 1885	Presented
1470	NHMUK PI P 3557 (9)	2	hand specimen				Pachinion scriptum (Roemer, 1864)		Flamborough, Yorkshire, England, United Kingdom	Cretaceous, Chalk Group, Upper Chalk	LEE, John Edward Collection, October 1885	Presented
1471	NHMUK PI P 3557 (10)	1	hand specimen				Pachinion scriptum (Roemer, 1864)		Flamborough, Yorkshire, England, United Kingdom	Cretaceous, Chalk Group, Upper Chalk	LEE, John Edward Collection, October 1885	Presented
1472	NHMUK PI P 1251 (21)	1	hand specimen				Pachinion scriptum (Roemer, 1864)		Flamborough, Yorkshire, England, United Kingdom	Cretaceous, Chalk Group, Upper Chalk	History unrecorded
1473	NHMUK PI P 1251 (22)	1	hand specimen				Pachinion scriptum (Roemer, 1864)		Flamborough, Yorkshire, England, United Kingdom	Cretaceous, Chalk Group, Upper Chalk	History unrecorded
1474	NHMUK PI P 3557 (11)	1	hand specimen				Pachinion scriptum (Roemer, 1864)		Flamborough, Yorkshire, England, United Kingdom	Cretaceous, Chalk Group, Upper Chalk	LEE, John Edward Collection, October 1885	Presented
1475	NHMUK PI P 1251 (23)	1	hand specimen				Pachinion scriptum (Roemer, 1864)		Flamborough, Yorkshire, England, United Kingdom	Cretaceous, Chalk Group, Upper Chalk	History unrecorded
1476	NHMUK PI P 1251 (24)	2	hand specimen				Pachinion scriptum (Roemer, 1864)		Flamborough, Yorkshire, England, United Kingdom	Cretaceous, Chalk Group, Upper Chalk	History unrecorded
1477	NHMUK PI P 1251 (25)	1	hand specimen				Pachinion scriptum (Roemer, 1864)		Flamborough, Yorkshire, England, United Kingdom	Cretaceous, Chalk Group, Upper Chalk	History unrecorded
1478	NHMUK PI S 9954	1	hand specimen		17816	Wright Collection number	Pachinion scriptum (Roemer, 1864)		Dane's Dyke, Sewerby, Bridlington, Yorkshire, England, United Kingdom	Cretaceous, Chalk Group, Upper Chalk, Senonian, I. lingua zone	WRIGHT, Claud William, Collection [1933]	Presented
1479	NHMUK PI S 9958	1	hand specimen		12990	Wright Collection number	Pachinion scriptum (Roemer, 1864)		Dane's Dyke, Sewerby, Bridlington, Yorkshire, England, United Kingdom	Cretaceous, Chalk Group, Upper Chalk, Senonian, I. lingua zone	WRIGHT, Claud William, Collection [1933]	Presented
1480	NHMUK PI S 9956	2	hand specimen		13008	Wright Collection number	Pachinion scriptum (Roemer, 1864)		Dane's Dyke, Sewerby, Bridlington, Yorkshire, England, United Kingdom	Cretaceous, Chalk Group, Upper Chalk, Senonian, I. lingua zone	WRIGHT, Claud William, Collection [1933]	Presented
1481	NHMUK PI S 9967	2	hand specimen		7762	Wright Collection number	Pachinion scriptum (Roemer, 1864)		Dane's Dyke, Sewerby, Bridlington, Yorkshire, England, United Kingdom	Cretaceous, Chalk Group, Upper Chalk, Senonian, I. lingua zone	WRIGHT, Claud William, Collection [1933]	Presented
1482	NHMUK PI S 9955	1	hand specimen		17821	Wright Collection number	Pachinion scriptum (Roemer, 1864)		Dane's Dyke, Sewerby, Bridlington, Yorkshire, England, United Kingdom	Cretaceous, Chalk Group, Upper Chalk, Senonian, I. lingua zone	WRIGHT, Claud William, Collection [1933]	Presented
1483	NHMUK PI S 9959	1	hand specimen		12999	Wright Collection number	Pachinion scriptum (Roemer, 1864)		Dane's Dyke, Sewerby, Bridlington, Yorkshire, England, United Kingdom	Cretaceous, Chalk Group, Upper Chalk, Senonian, I. lingua zone	WRIGHT, Claud William, Collection [1933]	Presented
1484	NHMUK PI S 9957	1	hand specimen		12971	Wright Collection number	Pachinion scriptum (Roemer, 1864)		Dane's Dyke, Sewerby, Bridlington, Yorkshire, England, United Kingdom	Cretaceous, Chalk Group, Upper Chalk, Senonian, I. lingua zone	WRIGHT, Claud William, Collection [1933]	Presented
1485	NHMUK PI S 9968	1	hand specimen		96	Wright Collection number	Pachinion scriptum (Roemer, 1864)		South Landing-High Stacks, Flamborough Head, Yorkshire, England, United Kingdom	Cretaceous, Chalk Group, Upper Chalk, Senonian, M. coranguinum zone	WRIGHT, Claud William, Collection [1933]	Presented
1486	NHMUK PI P 1250 (1)	2	hand specimen				Pachinion scriptum (Roemer, 1864)		Reigate, Surrey, England, United Kingdom	Cretaceous, Chalk Group, Upper Chalk	History unrecorded
1487	NHMUK PI S 8000	1	hand specimen				Pachinion scriptum (Roemer, 1864)		Flamborough, Yorkshire, England, United Kingdom	Cretaceous, Chalk Group, Upper Chalk	ROWE, Arthur Walter, Nov 1926	Purchased
1488	NHMUK PI P 1249	2	hand specimen				Pachinion scriptum (Roemer, 1864)		Flamborough, Yorkshire, England, United Kingdom	Cretaceous, Chalk Group, Upper Chalk	History unrecorded
1489	NHMUK PI S 8001	1	hand specimen				Pachinion scriptum (Roemer, 1864)		Flamborough, Yorkshire, England, United Kingdom	Cretaceous, Chalk Group, Upper Chalk, Senonian, M. coranguinum zone	ROWE, Arthur Walter, Nov 1926	Purchased
1490	NHMUK PI S 9678	1	hand specimen				Pachinion scriptum (Roemer, 1864)		Gillingham, Kent, England, United Kingdom	Cretaceous, Chalk Group, Upper Chalk, Senonian, M. coranguinum zone	ROWE, Arthur Walter, Nov 1926	Purchased
1491	NHMUK PI P 4154 (1)	1	hand specimen				Pachinion scriptum (Roemer, 1864)		Flamborough, Yorkshire, England, United Kingdom	Cretaceous, Chalk Group, Upper Chalk	HARFORD, Fredrik, Jun 1888	Purchased
1492	NHMUK PI P 4154 (2)	1	hand specimen				Pachinion scriptum (Roemer, 1864)		Flamborough, Yorkshire, England, United Kingdom	Cretaceous, Chalk Group, Upper Chalk	History unrecorded
1493	NHMUK PI S 8003	2	hand specimen				Pachinion scriptum (Roemer, 1864)		Sewerby, Bridlington, Yorkshire, England, United Kingdom	Cretaceous, Chalk Group, Upper Chalk	ROWE, Arthur Walter, Nov 1926	Purchased
1494	NHMUK PI S 9568	1	hand specimen				Pachinion scriptum (Roemer, 1864)		Sewerby, Bridlington, Yorkshire, England, United Kingdom	Cretaceous, Chalk Group, Upper Chalk, Senonian, A. quadratus zone	ROWE, Arthur Walter, Nov 1926	Purchased
1495	NHMUK PI P 1250 (2)	1	hand specimen				Pachinion scriptum (Roemer, 1864)		Reigate, Surrey, England, United Kingdom	Cretaceous, Chalk Group, Upper Chalk	History unrecorded
1496	NHMUK PI P 1248 (1)	1	hand specimen				Pachinion scriptum (Roemer, 1864)		Flamborough, Yorkshire, England, United Kingdom	Cretaceous, Chalk Group, Upper Chalk	History unrecorded
1497	NHMUK PI P 1248 (2)	3	hand specimen				Pachinion scriptum (Roemer, 1864)		Flamborough, Yorkshire, England, United Kingdom	Cretaceous, Chalk Group, Upper Chalk	SMITH, Joshua Toulmin, 1869	Purchased
1498	NHMUK PI S 8002	1	hand specimen				Pachinion scriptum (Roemer, 1864)		Flamborough, Yorkshire, England, United Kingdom	Cretaceous, Upper Chalk, Marsupites zone	ROWE, Arthur Walter, Nov 1926	Purchased
1499	NHMUK PI S 10726	1	hand specimen				Pachinion scriptum (Roemer, 1864)		Yorkshire; Sewerby Steps, Sewerby, Bridlington, Foreshore exposures to the SE of Sewerby Steps, Sewerby, NE of Bridlington, England, United Kingdom	Cretaceous, Late Cretaceous, Campanian. Flamborough Sponge Bed. local Offaster pilula Zone - Inoceramus lingua Zone	WARD, David, J., 19 Oct 1994	Donated
1500	NHMUK PI S 10727	1	hand specimen				Pachinion scriptum (Roemer, 1864)		Yorkshire; Sewerby Steps, Sewerby, Bridlington, Foreshore exposures to the SE of Sewerby Steps, Sewerby, NE of Bridlington, England, United Kingdom	Cretaceous, Late Cretaceous, Campanian. Flamborough Sponge Bed. local Offaster pilula Zone - Inoceramus lingua Zone	WARD, David, J., 19 Oct 1994	Donated
1501	NHMUK PI S 10728	1	hand specimen				Pachinion scriptum (Roemer, 1864)		Yorkshire; Sewerby Steps, Sewerby, Bridlington, Foreshore exposures to the SE of Sewerby Steps, Sewerby, NE of Bridlington, England, United Kingdom	Cretaceous, Late Cretaceous, Campanian. Flamborough Sponge Bed. local Offaster pilula Zone - Inoceramus lingua Zone	WARD, David, J., 19 Oct 1994	Donated
1502	NHMUK PI S 10729	1	hand specimen				Pachinion scriptum (Roemer, 1864)		Yorkshire; Sewerby Steps, Sewerby, Bridlington, Foreshore exposures to the SE of Sewerby Steps, Sewerby, NE of Bridlington, England, United Kingdom	Cretaceous, Late Cretaceous, Campanian. Flamborough Sponge Bed. local Offaster pilula Zone - Inoceramus lingua Zone	WARD, David, J., 19 Oct 1994	Donated
1503	NHMUK PI S 10730	1	hand specimen				Pachinion scriptum (Roemer, 1864)		Yorkshire; Sewerby Steps, Sewerby, Bridlington, Foreshore exposures to the SE of Sewerby Steps, Sewerby, NE of Bridlington, England, United Kingdom	Cretaceous, Late Cretaceous, Campanian. Flamborough Sponge Bed. local Offaster pilula Zone - Inoceramus lingua Zone	WARD, David, J., 19 Oct 1994	Donated
1504	NHMUK PI S 10731	1	hand specimen				Pachinion scriptum (Roemer, 1864)		Yorkshire; Sewerby Steps, Sewerby, Bridlington, Foreshore exposures to the SE of Sewerby Steps, Sewerby, NE of Bridlington, England, United Kingdom	Cretaceous, Late Cretaceous, Campanian. Flamborough Sponge Bed. local Offaster pilula Zone - Inoceramus lingua Zone	WARD, David, J., 19 Oct 1994	Donated
1505	NHMUK PI S 10732	1	hand specimen				Pachinion scriptum (Roemer, 1864)		Yorkshire; Sewerby Steps, Sewerby, Bridlington, Foreshore exposures to the SE of Sewerby Steps, Sewerby, NE of Bridlington, England, United Kingdom	Cretaceous, Late Cretaceous, Campanian. Flamborough Sponge Bed. local Offaster pilula Zone - Inoceramus lingua Zone	WARD, David, J., 19 Oct 1994	Donated
1506	NHMUK PI S 10733	1	hand specimen				Pachinion scriptum (Roemer, 1864)		Yorkshire; Sewerby Steps, Sewerby, Bridlington, Foreshore exposures to the SE of Sewerby Steps, Sewerby, NE of Bridlington, England, United Kingdom	Cretaceous, Late Cretaceous, Campanian. Flamborough Sponge Bed. local Offaster pilula Zone - Inoceramus lingua Zone	WARD, David, J., 19 Oct 1994	Donated
1507	NHMUK PI S 10734	1	hand specimen				Pachinion scriptum (Roemer, 1864)		Yorkshire; Sewerby Steps, Sewerby, Bridlington, Foreshore exposures to the SE of Sewerby Steps, Sewerby, NE of Bridlington, England, United Kingdom	Cretaceous, Late Cretaceous, Campanian. Flamborough Sponge Bed. local Offaster pilula Zone - Inoceramus lingua Zone	WARD, David, J., 19 Oct 1994	Donated
1508	NHMUK PI S 10735	1	hand specimen				Pachinion scriptum (Roemer, 1864)		Yorkshire; Sewerby Steps, Sewerby, Bridlington, Foreshore exposures to the SE of Sewerby Steps, Sewerby, NE of Bridlington, England, United Kingdom	Cretaceous, Late Cretaceous, Campanian. Flamborough Sponge Bed. local Offaster pilula Zone - Inoceramus lingua Zone	WARD, David, J., 19 Oct 1994	Donated
1509	NHMUK PI S 10736	1	hand specimen				Pachinion scriptum (Roemer, 1864)		Yorkshire; Sewerby Steps, Sewerby, Bridlington, Foreshore exposures to the SE of Sewerby Steps, Sewerby, NE of Bridlington, England, United Kingdom	Cretaceous, Late Cretaceous, Campanian. Flamborough Sponge Bed. local Offaster pilula Zone - Inoceramus lingua Zone	WARD, David, J., 19 Oct 1994	Donated
1510	NHMUK PI S 10737	1	hand specimen				Pachinion scriptum (Roemer, 1864)		Yorkshire; Sewerby Steps, Sewerby, Bridlington, Foreshore exposures to the SE of Sewerby Steps, Sewerby, NE of Bridlington, England, United Kingdom	Cretaceous, Late Cretaceous, Campanian. Flamborough Sponge Bed. local Offaster pilula Zone - Inoceramus lingua Zone	WARD, David, J., 19 Oct 1994	Donated
1511	NHMUK PI S 10738	1	hand specimen				Pachinion scriptum (Roemer, 1864)		Yorkshire; Sewerby Steps, Sewerby, Bridlington, Foreshore exposures to the SE of Sewerby Steps, Sewerby, NE of Bridlington, England, United Kingdom	Cretaceous, Late Cretaceous, Campanian. Flamborough Sponge Bed. local Offaster pilula Zone - Inoceramus lingua Zone	WARD, David, J., 19 Oct 1994	Donated
1512	NHMUK PI S 10739	1	hand specimen				Pachinion scriptum (Roemer, 1864)		Yorkshire; Sewerby Steps, Sewerby, Bridlington, Foreshore exposures to the SE of Sewerby Steps, Sewerby, NE of Bridlington, England, United Kingdom	Cretaceous, Late Cretaceous, Campanian. Flamborough Sponge Bed. local Offaster pilula Zone - Inoceramus lingua Zone	WARD, David, J., 19 Oct 1994	Donated
1513	NHMUK PI S 10740	1	hand specimen				Pachinion scriptum (Roemer, 1864)		Yorkshire; Sewerby Steps, Sewerby, Bridlington, Foreshore exposures to the SE of Sewerby Steps, Sewerby, NE of Bridlington, England, United Kingdom	Cretaceous, Late Cretaceous, Campanian. Flamborough Sponge Bed. local Offaster pilula Zone - Inoceramus lingua Zone	WARD, David, J., 19 Oct 1994	Donated
1514	NHMUK PI S 10741	1	hand specimen				Pachinion scriptum (Roemer, 1864)		Yorkshire; Sewerby Steps, Sewerby, Bridlington, Foreshore exposures to the SE of Sewerby Steps, Sewerby, NE of Bridlington, England, United Kingdom	Cretaceous, Late Cretaceous, Campanian. Flamborough Sponge Bed. local Offaster pilula Zone - Inoceramus lingua Zone	WARD, David, J., 19 Oct 1994	Donated
1515	NHMUK PI S 10742	1	hand specimen				Pachinion scriptum (Roemer, 1864)		Yorkshire; Sewerby Steps, Sewerby, Bridlington, Foreshore exposures to the SE of Sewerby Steps, Sewerby, NE of Bridlington, England, United Kingdom	Cretaceous, Late Cretaceous, Campanian. Flamborough Sponge Bed. local Offaster pilula Zone - Inoceramus lingua Zone	WARD, David, J., 19 Oct 1994	Donated
1516	NHMUK PI S 10743	1	hand specimen				Pachinion scriptum (Roemer, 1864)		Yorkshire; Sewerby Steps, Sewerby, Bridlington, Foreshore exposures to the SE of Sewerby Steps, Sewerby, NE of Bridlington, England, United Kingdom	Cretaceous, Late Cretaceous, Campanian. Flamborough Sponge Bed. local Offaster pilula Zone - Inoceramus lingua Zone	WARD, David, J., 19 Oct 1994	Donated
1517	NHMUK PI S 10744	1	hand specimen				Pachinion scriptum (Roemer, 1864)		Yorkshire; Sewerby Steps, Sewerby, Bridlington, Foreshore exposures to the SE of Sewerby Steps, Sewerby, NE of Bridlington, England, United Kingdom	Cretaceous, Late Cretaceous, Campanian. Flamborough Sponge Bed. local Offaster pilula Zone - Inoceramus lingua Zone	WARD, David, J., 19 Oct 1994	Donated
1518	NHMUK PI S 10745	1	hand specimen				Pachinion scriptum (Roemer, 1864)		Yorkshire; Sewerby Steps, Sewerby, Bridlington, Foreshore exposures to the SE of Sewerby Steps, Sewerby, NE of Bridlington, England, United Kingdom	Cretaceous, Late Cretaceous, Campanian. Flamborough Sponge Bed. local Offaster pilula Zone - Inoceramus lingua Zone	WARD, David, J., 19 Oct 1994	Donated
1519	NHMUK PI S 10746	1	hand specimen				Pachinion scriptum (Roemer, 1864)		Yorkshire; Sewerby Steps, Sewerby, Bridlington, Foreshore exposures to the SE of Sewerby Steps, Sewerby, NE of Bridlington, England, United Kingdom	Cretaceous, Late Cretaceous, Campanian. Flamborough Sponge Bed. local Offaster pilula Zone - Inoceramus lingua Zone	WARD, David, J., 19 Oct 1994	Donated
1520	NHMUK PI S 10747	1	hand specimen				Pachinion scriptum (Roemer, 1864)		Yorkshire; Sewerby Steps, Sewerby, Bridlington, Foreshore exposures to the SE of Sewerby Steps, Sewerby, NE of Bridlington, England, United Kingdom	Cretaceous, Late Cretaceous, Campanian. Flamborough Sponge Bed. local Offaster pilula Zone - Inoceramus lingua Zone	WARD, David, J., 19 Oct 1994	Donated
1521	NHMUK PI S 10748	1	hand specimen				Pachinion scriptum (Roemer, 1864)		Yorkshire; Sewerby Steps, Sewerby, Bridlington, Foreshore exposures to the SE of Sewerby Steps, Sewerby, NE of Bridlington, England, United Kingdom	Cretaceous, Late Cretaceous, Campanian. Flamborough Sponge Bed. local Offaster pilula Zone - Inoceramus lingua Zone	WARD, David, J., 19 Oct 1994	Donated
1522	NHMUK PI S 10749	1	hand specimen				Pachinion scriptum (Roemer, 1864)		Yorkshire; Sewerby Steps, Sewerby, Bridlington, Foreshore exposures to the SE of Sewerby Steps, Sewerby, NE of Bridlington, England, United Kingdom	Cretaceous, Late Cretaceous, Campanian. Flamborough Sponge Bed. local Offaster pilula Zone - Inoceramus lingua Zone	WARD, David, J., 19 Oct 1994	Donated
1523	NHMUK PI S 10750	1	hand specimen				Pachinion scriptum (Roemer, 1864)		Yorkshire; Sewerby Steps, Sewerby, Bridlington, Foreshore exposures to the SE of Sewerby Steps, Sewerby, NE of Bridlington, England, United Kingdom	Cretaceous, Late Cretaceous, Campanian. Flamborough Sponge Bed. local Offaster pilula Zone - Inoceramus lingua Zone	WARD, David, J., 19 Oct 1994	Donated
1524	NHMUK PI S 10751	1	hand specimen				Pachinion scriptum (Roemer, 1864)		Yorkshire; Sewerby Steps, Sewerby, Bridlington, Foreshore exposures to the SE of Sewerby Steps, Sewerby, NE of Bridlington, England, United Kingdom	Cretaceous, Late Cretaceous, Campanian. Flamborough Sponge Bed. local Offaster pilula Zone - Inoceramus lingua Zone	WARD, David, J., 19 Oct 1994	Donated
1525	NHMUK PI S 10752	1	hand specimen				Pachinion scriptum (Roemer, 1864)		Yorkshire; Sewerby Steps, Sewerby, Bridlington, Foreshore exposures to the SE of Sewerby Steps, Sewerby, NE of Bridlington, England, United Kingdom	Cretaceous, Late Cretaceous, Campanian. Flamborough Sponge Bed. local Offaster pilula Zone - Inoceramus lingua Zone	WARD, David, J., 19 Oct 1994	Donated
1526	NHMUK PI S 10753	1	hand specimen				Pachinion scriptum (Roemer, 1864)		Yorkshire; Sewerby Steps, Sewerby, Bridlington, Foreshore exposures to the SE of Sewerby Steps, Sewerby, NE of Bridlington, England, United Kingdom	Cretaceous, Late Cretaceous, Campanian. Flamborough Sponge Bed. local Offaster pilula Zone - Inoceramus lingua Zone	WARD, David, J., 19 Oct 1994	Donated
1527	NHMUK PI S 10754	1	hand specimen				Pachinion scriptum (Roemer, 1864)		Yorkshire; Sewerby Steps, Sewerby, Bridlington, Foreshore exposures to the SE of Sewerby Steps, Sewerby, NE of Bridlington, England, United Kingdom	Cretaceous, Late Cretaceous, Campanian. Flamborough Sponge Bed. local Offaster pilula Zone - Inoceramus lingua Zone	WARD, David, J., 19 Oct 1994	Donated
1528	NHMUK PI S 10755	1	hand specimen				Pachinion scriptum (Roemer, 1864)		Yorkshire; Sewerby Steps, Sewerby, Bridlington, Foreshore exposures to the SE of Sewerby Steps, Sewerby, NE of Bridlington, England, United Kingdom	Cretaceous, Late Cretaceous, Campanian. Flamborough Sponge Bed. local Offaster pilula Zone - Inoceramus lingua Zone	WARD, David, J., 19 Oct 1994	Donated
1529	NHMUK PI S 10756 (1)	1	hand specimen				Pachinion scriptum (Roemer, 1864)		Yorkshire; Sewerby Steps, Sewerby, Bridlington, Foreshore exposures to the SE of Sewerby Steps, Sewerby, NE of Bridlington, England, United Kingdom	Cretaceous, Late Cretaceous, Campanian. Flamborough Sponge Bed. local Offaster pilula Zone - Inoceramus lingua Zone	WARD, David, J., 19 Oct 1994	Donated
1530	NHMUK PI S 10756 (2)	1	hand specimen				Pachinion scriptum (Roemer, 1864)		Yorkshire; Sewerby Steps, Sewerby, Bridlington, Foreshore exposures to the SE of Sewerby Steps, Sewerby, NE of Bridlington, England, United Kingdom	Cretaceous, Late Cretaceous, Campanian. Flamborough Sponge Bed. local Offaster pilula Zone - Inoceramus lingua Zone	WARD, David, J., 19 Oct 1994	Donated
1531	NHMUK PI S 7999	2	hand specimen				Pachinion scriptum (Roemer, 1864)		Flamborough, Yorkshire, England, United Kingdom	Cretaceous, Chalk Group, Upper Chalk	ROWE, Arthur Walter, Nov 1926	Purchased
1532	NHMUK PI P 1300	2	hand specimen				Heterostinia obliqua (Bennett, 1831)		Stockton, Wiltshire, England, United Kindgom	Cretaceous, Chalk Group, Upper Chalk	History unrecorded
1533	NHMUK PI P 2277	1	hand specimen				Heterostinia obliqua (Bennett, 1831)		Flamborough, Yorkshire, England, United Kingdom	Cretaceous, Chalk Group, Upper Chalk	Zoology Department, 1884	Transferred
1534	NHMUK PI P 1287	3	hand specimen				Heterostinia obliqua (Bennett, 1831)		Wiltshire, England, United Kingdom	Cretaceous, Chalk Group, Upper Chalk, Senonian	BAKER, J.	Purchased
1535	NHMUK PI S 4908	1	hand specimen				Heterostinia obliqua (Bennett, 1831)		Hewitt, Ashill, Norfolk, England, United Kingdom	Cretaceous, Chalk Group, Upper Chalk, Senonian, M. coranguinum zone	HEWITT, H. D., Jun 1938	Presented
1536	NHMUK PI P 1291	2	hand specimen				Heterostinia obliqua (Bennett, 1831)		Beckhampton, Wiltshire, England, United Kingdom	Cretaceous, Chalk Group, Upper Chalk	CUNNINGTON Collection	Purchased
1537	NHMUK PI P 3540	2	hand specimen				Heterostinia obliqua (Bennett, 1831)		Warminster, Wiltshire, England, United Kingdom	Cretaceous, Chalk Group, Upper Chalk	LEE, John Edward Collection, October 1885	Presented
1538	NHMUK PI S 9571	1	hand specimen				Heterostinia obliqua (Bennett, 1831)		Sewerby, Bridlington, Yorkshire, England, United Kingdom	Cretaceous, Chalk Group, Upper Chalk, Senonian, A. quadratus zone	ROWE, Arthur Walter, Nov 1926	Purchased
1539	NHMUK PI P 1292 (1)	1	hand specimen				Heterostinia obliqua (Bennett, 1831)		Wiltshire, England, United Kingdom	Cretaceous, Chalk Group, Upper Chalk	MANTELL, Gideon Algernon, 1839	Purchased
1540	NHMUK PI OR 5281	1	hand specimen				Heterostinia obliqua (Bennett, 1831)		Wiltshire, England, United Kingdom	Cretaceous, Chalk Group, Upper Chalk	MANTELL, Gideon Algernon, 1839	Purchased
1541	NHMUK PI P 1292 (2)	1	hand specimen				Heterostinia obliqua (Bennett, 1831)		Wiltshire, England, United Kingdom	Cretaceous, Chalk Group, Upper Chalk	MANTELL, Gideon Algernon, 1839	Purchased
1542	NHMUK PI P 1283	4	hand specimen				Heterostinia obliqua (Bennett, 1831)		Wiltshire, England, United Kingdom	Cretaceous, Chalk Group, Upper Chalk	MANTELL, Gideon Algernon, 1839	Purchased
1543	NHMUK PI P 1284	2	hand specimen				Heterostinia obliqua (Bennett, 1831)		Wiltshire, England, United Kingdom	Cretaceous, Chalk Group, Upper Chalk	BROWN, J.	Presented
1544	NHMUK PI P 1296 (1)	1	hand specimen				Heterostinia obliqua (Bennett, 1831)		Flamborough, Yorkshire, England, United Kingdom	Cretaceous, Chalk Group, Upper Chalk	History unrecorded
1545	NHMUK PI P 1286	2	hand specimen				Heterostinia obliqua (Bennett, 1831)		Wiltshire, England, United Kingdom	Cretaceous, Chalk Group, Upper Chalk	CAPRON Collection	Purchased
1546	NHMUK PI P 1294	1	hand specimen				Heterostinia obliqua (Bennett, 1831)		Wiltshire, England, United Kingdom	Cretaceous, Chalk Group, Upper Chalk	MANTELL, Gideon Algernon, 1839	Purchased
1547	NHMUK PI P 1288	1	hand specimen				Heterostinia obliqua (Bennett, 1831)		Wiley, Hindon, Wiltshire, England, United Kingdom	Cretaceous, Chalk Group, Upper Chalk	History unrecorded
1548	NHMUK PI P 1285	3	hand specimen				Heterostinia obliqua (Bennett, 1831)		Wiltshire, England, United Kingdom	Cretaceous, Chalk Group, Upper Chalk	BRIGHT Collection
1549	NHMUK PI P 1289	1	hand specimen				Heterostinia obliqua (Bennett, 1831)		Pertwood, Warminster, Wiltshire, England, United Kingdom	Cretaceous, Chalk Group, Upper Chalk, Senonian	History unrecorded
1550	NHMUK PI P 1295	4	hand specimen				Heterostinia obliqua (Bennett, 1831)		Wiltshire, England, United Kingdom	Cretaceous, Chalk Group, Upper Chalk	LUDLAM, Henry, July 1871	Presented
1551	NHMUK PI P 1290	1	hand specimen				Heterostinia obliqua (Bennett, 1831)		Upware, Cambridgeshire, England, United Kingdom	Cretaceous, Chalk Group, Upper Chalk	LUDLAM, Henry, July 1871	Presented
1552	NHMUK PI P 3609	1	hand specimen				Heterostinia obliqua (Bennett, 1831)		Luton, Bedfordshire, England, United Kingdom	Cretaceous, Chalk Group, Upper Chalk	LUNN, Mrs., 1885	Purchased
1553	NHMUK PI P 1281 (1)	1	hand specimen				Heterostinia obliqua (Bennett, 1831)	Figured	Wiltshire, England, United Kingdom	Cretaceous, Chalk Group, Upper Chalk	History unrecorded		Hinde, G.J. 1884. Catalogue of the Fossil Sponges in the Geological Department of the British Museum (Natural History). With descriptions of new and little-known species. BM(NH), London, 248 pp. (on pl.10, fig. 2a)
1554	NHMUK PI P 1281 (2)	2	hand specimen				Heterostinia obliqua (Bennett, 1831)	Figured	Wiltshire, England, United Kingdom	Cretaceous, Chalk Group, Upper Chalk	History unrecorded		Hinde, G.J. 1884. Catalogue of the Fossil Sponges in the Geological Department of the British Museum (Natural History). With descriptions of new and little-known species. BM(NH), London, 248 pp. (on pl.10, fig. 2)
1555	NHMUK PI P 1281 (3)	8	hand specimen				Heterostinia obliqua (Bennett, 1831)		Wiltshire, England, United Kingdom	Cretaceous, Chalk Group, Upper Chalk	History unrecorded
1556	NHMUK PI P 1282	8	hand specimen				Heterostinia obliqua (Bennett, 1831)		Wiltshire, England, United Kingdom	Cretaceous, Chalk Group, Upper Chalk	History unrecorded
1557	NHMUK PI P 3605 (1)	2	hand specimen				Heterostinia obliqua (Bennett, 1831)		Flamborough, Yorkshire, England, United Kingdom	Cretaceous, Chalk Group, Upper Chalk	LEE, John Edward Collection, October 1885	Presented
1558	NHMUK PI P 1296 (2)	1	hand specimen				Heterostinia obliqua (Bennett, 1831)		Flamborough, Yorkshire, England, United Kingdom	Cretaceous, Chalk Group, Upper Chalk	History unrecorded
1559	NHMUK PI P 1281 (4)	4	hand specimen				Heterostinia obliqua (Bennett, 1831)		Wiltshire, England, United Kingdom	Cretaceous, Chalk Group, Upper Chalk	History unrecorded
1560	NHMUK PI S 4907	1	hand specimen				Heterostinia obliqua (Bennett, 1831)		Pit West of Hewitt, Ashill, Norfolk, England, United Kingdom	Cretaceous, Chalk Group, Upper Chalk, Senonian, M. coranguinum zone	HEWITT, H. D., Jun 1938	Presented
1561	NHMUK PI P 1297	1	hand specimen				Heterostinia obliqua (Bennett, 1831)		Flamborough, Yorkshire, England, United Kingdom	Cretaceous, Chalk Group, Upper Chalk	History unrecorded
1562	NHMUK PI S 10757 (1)	1	hand specimen				Lithistida Schmidt, 1870		South of England	Cretaceous	History unrecorded
1563	NHMUK PI S 10099	1	hand specimen		17016	Wright Collection number	Lithistida Schmidt, 1870		Wilderness Pit, Guildford, Surrey, England, United Kingdom	Cretaceous, Chalk Group, Upper Chalk, Senonian, M. testudinarius zone	WRIGHT, Claud William, Collection [1933]	Presented
1564	NHMUK PI S 10098	1	hand specimen		12946	Wright Collection number	Lithistida Schmidt, 1870		Guidford-Godalming bypass road, Surrey, England, United Kingdom	Cretaceous, Chalk Group, Upper Chalk, Turonian, H. planus zone	WRIGHT, Claud William, Collection [1933]	Presented
1565	NHMUK PI S 10097	1	hand specimen		12934	Wright Collection number	Lithistida Schmidt, 1870		Guidford-Godalming bypass road, Surrey, England, United Kingdom	Cretaceous, Chalk Group, Upper Chalk, Turonian, H. planus zone	WRIGHT, Claud William, Collection [1933]	Presented
1566	NHMUK PI S 10049	1	hand specimen		7926	Wright Collection number	Lithistida Schmidt, 1870		Burdale, Yorkshire, England, United Kingdom	Cretaceous, Chalk Group, Upper Chalk, Turonian, H. planus zone	WRIGHT, Claud William, Collection [1933]	Presented
1567	NHMUK PI S 10023	1	hand specimen		14573	Wright Collection number	Lithistida Schmidt, 1870		Upper Woodford, Wiltshire, England, United Kingdom	Cretaceous, Chalk Group, Upper Chalk, Senonian, M. cortest. zone	WRIGHT, Claud William, Collection [1933]	Presented
1568	NHMUK PI S 10051	1	hand specimen				Lithistida Schmidt, 1870		Whitlands, Devon, England, United Kingdom	Cretaceous, Upper Greensand	WRIGHT, Claud William, Collection [1933]	Presented
1569	NHMUK PI S 10108	1	hand specimen		14802	Wright Collection number	Lithistida Schmidt, 1870		Mickleham bypass, Surrey, England, United Kingdom	Cretaceous, Chalk Group, Upper Chalk, Turonian, H. planus zone	WRIGHT, Claud William, Collection [1933]	Presented
1570	NHMUK PI S 10024	1	hand specimen		12961	Wright Collection number	Lithistida Schmidt, 1870		Guidford-Godalming bypass road, Surrey, England, United Kingdom	Cretaceous, Chalk Group, Upper Chalk, Turonian, H. planus zone	WRIGHT, Claud William, Collection [1933]	Presented
1571	NHMUK PI S 10025	1	hand specimen		14495	Wright Collection number	Lithistida Schmidt, 1870		Upper Woodford, Wiltshire, England, United Kingdom	Cretaceous, Chalk Group, Upper Chalk, Senonian, M. cortest. zone	WRIGHT, Claud William, Collection [1933]	Presented
1572	NHMUK PI S 10029	1	hand specimen		20974	Wright Collection number	Lithistida Schmidt, 1870		Dane's Dyke, Sewerby, Bridlington, Yorkshire, England, United Kingdom	Cretaceous, Chalk Group, Upper Chalk, Senonian, I. lingua zone	WRIGHT, Claud William, Collection [1933]	Presented
1573	NHMUK PI S 10093	1	hand specimen		7924	Wright Collection number	Lithistida Schmidt, 1870		Wetwang, Yorkshire, England, United Kingdom	Cretaceous, Chalk Group, Upper Chalk, Senonian	WRIGHT, Claud William, Collection [1933]	Presented
1574	NHMUK PI S 10107	1	hand specimen		12923	Wright Collection number	Lithistida Schmidt, 1870		Pit 38, Kiplingcotes, Yorkshire, England, United Kingdom	Cretaceous, Chalk Group, Upper Chalk, Turonian, H. planus zone	WRIGHT, Claud William, Collection [1933]	Presented
1575	NHMUK PI S 10021	1	hand specimen		14562	Wright Collection number	Lithistida Schmidt, 1870		Upper Woodford, Wiltshire, England, United Kingdom	Cretaceous, Chalk Group, Upper Chalk, Senonian, M. cortest. zone	WRIGHT, Claud William, Collection [1933]	Presented
1576	NHMUK PI S 10022	1	hand specimen		14574	Wright Collection number	Lithistida Schmidt, 1870		Upper Woodford, Wiltshire, England, United Kingdom	Cretaceous, Chalk Group, Upper Chalk, Senonian, M. cortest. zone	WRIGHT, Claud William, Collection [1933]	Presented
1577	NHMUK PI S 10026	1	hand specimen		14618	Wright Collection number	Lithistida Schmidt, 1870		Pit 25, Gameldon, Wiltshire, England, United Kingdom	Cretaceous, Chalk Group, Upper Chalk, Senonian, M. coranguinum zone	WRIGHT, Claud William, Collection [1933]	Presented
1578	NHMUK PI S 10028	1	hand specimen		12998	Wright Collection number	Lithistida Schmidt, 1870		Dane's Dyke, Sewerby, Bridlington, Yorkshire, England, United Kingdom	Cretaceous, Chalk Group, Upper Chalk, Senonian, I. lingua zone	WRIGHT, Claud William, Collection [1933]	Presented
1579	NHMUK PI S 10110	1	hand specimen		13002	Wright Collection number	Lithistida Schmidt, 1870		Hog's Back, Farnham, Surrey, England, United Kingdom	Cretaceous, Chalk Group, Upper Chalk, Turonian, T. lata zone	WRIGHT, Claud William, Collection [1933]	Presented
1580	NHMUK PI S 10030	1	hand specimen		17826	Wright Collection number	Lithistida Schmidt, 1870		Dane's Dyke, Sewerby, Bridlington, Yorkshire, England, United Kingdom	Cretaceous, Chalk Group, Upper Chalk, Senonian, I. lingua zone	WRIGHT, Claud William, Collection [1933]	Presented
1581	NHMUK PI S 10031	1	hand specimen		17825	Wright Collection number	Lithistida Schmidt, 1870		Dane's Dyke, Sewerby, Bridlington, Yorkshire, England, United Kingdom	Cretaceous, Chalk Group, Upper Chalk, Senonian, I. lingua zone	WRIGHT, Claud William, Collection [1933]	Presented
1582	NHMUK PI S 10032	1	hand specimen		17821	Wright Collection number	Lithistida Schmidt, 1870		Dane's Dyke, Sewerby, Bridlington, Yorkshire, England, United Kingdom	Cretaceous, Chalk Group, Upper Chalk, Senonian, I. lingua zone	WRIGHT, Claud William, Collection [1933]	Presented
1583	NHMUK PI S 7743	2	hand specimen				Lithistida Schmidt, 1870		Sandown Bay, Isle of Wight, England, United Kingdom	Cretaceous, Chalk Group, Upper Chalk	ROWE, Arthur Walter, Nov 1926	Purchased
1584	NHMUK PI S 5410	1	hand specimen				Lithistida Schmidt, 1870		Shaftesbury, Dorset, England, United Kingdom	Cretaceous, Upper Greensand	STINTON, F.C., Mar. 1947	Presented
1585	NHMUK PI S 7878	1	hand specimen				Lithistida Schmidt, 1870		Sandown Bay, Isle of Wight, England, United Kingdom	Cretaceous, Chalk Group, Upper Chalk	ROWE, Arthur Walter, Nov 1926	Purchased
1586	NHMUK PI P 1245	2	hand specimen				Pachinion Zittel, 1878		Flamborough, Yorkshire, England, United Kingdom	Cretaceous, Chalk Group, Upper Chalk	HINDE, Dr. George Jennings	Presented
1587	NHMUK PI S 7746	1	hand specimen				Lithistida Schmidt, 1870		Sandown Bay, Isle of Wight, England, United Kingdom	Cretaceous, Chalk Group, Upper Chalk	ROWE, Arthur Walter, Nov 1926	Purchased
1588	NHMUK PI S 7748	2	hand specimen				Lithistida Schmidt, 1870		Sandown Bay, Isle of Wight, England, United Kingdom	Cretaceous, Chalk Group, Upper Chalk	ROWE, Arthur Walter, Nov 1926	Purchased
1589	NHMUK PI S 7745	2	hand specimen				Lithistida Schmidt, 1870		Sandown Bay, Isle of Wight, England, United Kingdom	Cretaceous, Chalk Group, Upper Chalk	ROWE, Arthur Walter, Nov 1926	Purchased
1590	NHMUK PI S 7742	3	hand specimen				Lithistida Schmidt, 1870		Sandown Bay, Isle of Wight, England, United Kingdom	Cretaceous, Chalk Group, Upper Chalk	ROWE, Arthur Walter, Nov 1926	Purchased
1591	NHMUK PI S 8801	1	hand specimen				Lithistida Schmidt, 1870		Brighton, Sussex, England, United Kingdom	Cretaceous, Chalk Group, Upper Chalk	BEGG, Miss M. E., Apr 1967	Presented
1592	NHMUK PI S 8228	1	hand specimen				Lithistida Schmidt, 1870		St. Lawrence, Isle of Wight, England United Kingdom	Cretaceous, Upper Greensand	FORD, R. L. E., Nov 1959	Presented
1593	NHMUK PI S 8229	1	hand specimen				Lithistida Schmidt, 1870		St. Lawrence, Isle of Wight, England United Kingdom	Cretaceous, Upper Greensand	FORD, R. L. E., Nov 1959	Presented
1594	NHMUK PI S 8200	2	hand specimen				Lithistida Schmidt, 1870		St. Lawrence, Isle of Wight, England United Kingdom	Cretaceous, Upper Greensand	FORD, R. L. E., Nov 1959	Presented
1595	NHMUK PI S 7830	2	hand specimen				Lithistida Schmidt, 1870		Dover, Kent, England, United Kingdom	Cretaceous, Chalk Group, Lower Chalk	ROWE, Arthur Walter, Nov 1926	Purchased
1596	NHMUK PI S 9633	1	hand specimen				Lithistida Schmidt, 1870		Gillingham, Kent, England, United Kingdom	Cretaceous, Chalk Group, Upper Chalk, Senonian, M. coranguinum zone	ROWE, Arthur Walter, Nov 1926	Purchased
1597	NHMUK PI S 9634	1	hand specimen				Lithistida Schmidt, 1870		Gillingham, Kent, England, United Kingdom	Cretaceous, Chalk Group, Upper Chalk, Senonian, M. coranguinum zone	ROWE, Arthur Walter, Nov 1926	Purchased
1598	NHMUK PI S 4638	1	thin section	Spiculiferous chert			Lithistida Schmidt, 1870		Flintham Hill, Wiltshire, England, United Kingdom	Cretaceous, Upper Greensand	HUTTON, Miss Harriett Mary, April 1937	Bequest
1599	NHMUK PI S 4523	1	hand specimen	Spicules			Lithistida Schmidt, 1870		Hunstanton, Norfolk, England, United Kingdom	Cretaceous, Cenomanian, White Chalk	STRANGE, H., Dec 1936	Presented
1600	NHMUK PI S 4505	1	hand specimen	Spicules			Lithistida Schmidt, 1870		Mundersley, Norfolk, England, United Kingdom	Cretaceous, Chalk Group, Upper Chalk, Senonian	REID, Mrs., Nov 1936	Presented
1601	NHMUK PI S 5435	1	hand specimen				Lithistida Schmidt, 1870		Blackwell Hill Farm, Latimer, Buckinghamshire, England, United Kingdom	Cretaceous, Upper Chalk, Chalk Rock	OAKLEY, Dr. K. P. & LEA, F.A., April 1947	Donated
1602	NHMUK PI S 5438	2	hand specimen				Lithistida Schmidt, 1870		Blackwell Hill Farm, Latimer, Buckinghamshire, England, United Kingdom	Cretaceous, Upper Chalk, Chalk Rock	OAKLEY, Dr. K. P. & LEA, F.A., April 1947	Donated
1603	NHMUK PI S 5441	1	hand specimen				Lithistida Schmidt, 1870		Blackwell Hill Farm, Latimer, Buckinghamshire, England, United Kingdom	Cretaceous, Upper Chalk, Chalk Rock	OAKLEY, Dr. K. P. & LEA, F.A., April 1947	Donated
1604	NHMUK PI S 4535	1	hand specimen	Spicules			Lithistida Schmidt, 1870		Hodgemoor Lane pit, Hurley, Berkshire, England, United Kingdom	Cretaceous, Chalk Group, Upper Chalk, Senonian, M. coranguinum zone	DIX, Miss. E., 4 Jul 1933
1605	NHMUK PI S 4536	1	hand specimen	Spicules			Lithistida Schmidt, 1870		Hodgemoor Lane pit, Hurley, Berkshire, England, United Kingdom	Cretaceous, Chalk Group, Upper Chalk, Senonian, M. coranguinum zone	DIX, Miss. E., 4 Jul 1933
1606	NHMUK PI S 9118	1	hand specimen				Lithistida Schmidt, 1870		Branscombe, Seaton, Devon, England, United Kingdom	Cretaceous, Cenomanian	HINDE, Dr. George Jennings, 1918	Presented
1607	NHMUK PI P 7340	1	hand specimen	Spicules			Lithistida Schmidt, 1870		Haldon Hills, Devon, England, United Kingdom	Cretaceous, Upper Greensand	VICARY, William, Nov 1903	Presented
1608	NHMUK PI S 8254	2	hand specimen				Lithistida Schmidt, 1870		St. Lawrence, Isle of Wight, England United Kingdom	Cretaceous, Upper Greensand	FORD, R. L. E., Nov 1959	Presented
1609	NHMUK PI S 7197	1	hand specimen	Spicular rock			Lithistida Schmidt, 1870		Blackdown Hills, Devon, England, United Kingdom	Cretaceous, Upper Greensand	HINDE, Dr. George Jennings, 1918	Presented
1610	NHMUK PI S 7198	1	hand specimen	Spicular rock			Lithistida Schmidt, 1870		Blackdown Hills, Devon, England, United Kingdom	Cretaceous, Upper Greensand	HINDE, Dr. George Jennings, 1918	Presented
1611	NHMUK PI S 7172	1	hand specimen		P 1684	BM(NH) number	Lithistida Schmidt, 1870		Heytesbury, Wiltshire, England, United Kingdom	Cretaceous, Chalk Group	MANTELL, Gideon Algernon, 1839	Purchased
1612	NHMUK PI S 7065	1	hand specimen				Lithistida Schmidt, 1870		Norwich Road, Thetford, Norfolk, England, United Kingdom	Cretaceous, Chalk Group, Upper Chalk, Senonian, M. cortest. zone	HEWITT, H. D., Oct 1937	Presented
1613	NHMUK PI P 3575	1	hand specimen				Lithistida Schmidt, 1870		Flamborough, Yorkshire, England, United Kingdom	Cretaceous, Chalk Group, Upper Chalk	LEE, John Edward Collection, October 1885	Presented
1614	NHMUK PI P 3571	1	hand specimen				Lithistida Schmidt, 1870		Flamborough, Yorkshire, England, United Kingdom	Cretaceous, Chalk Group, Upper Chalk	LEE, John Edward Collection, October 1885	Presented
1615	NHMUK PI S 9357	1	hand specimen				Lithistida Schmidt, 1870		Alton, Hampshire, England, United Kingdom	Cretaceous, Upper Greensand	JUKES-BROWNE, Alfred John, probably 1906
1616	NHMUK PI S 7001	1	hand specimen				Lithistida Schmidt, 1870		Flamborough, Yorkshire, England, United Kingdom	Cretaceous, Upper Chalk, Marsupites zone	OAKLEY, Dr. K. P., Dec 1950	Donated
1617	NHMUK PI P 5054	1	hand specimen				Lithistida Schmidt, 1870		Town Pit, Burlington, Yorkshire, England, United Kingdom	Cretaceous, Chalk Group	CHADWICK, S., Jul 1895	Purchased
1618	NHMUK PI S 4697	1	hand specimen	Spiculiferous chert			Lithistida Schmidt, 1870		Haddon Hill, Dorset, England, United Kingdom	Cretaceous, Upper Greensand	LANG, William D., 6 May 1938	Presented
1619	NHMUK PI P 9116	1	hand specimen				Lithistida Schmidt, 1870		Branscombe, Seaton, Devon, England, United Kingdom	Cretaceous, Cenomanian, Gritty Limestone	HINDE, Dr. George Jennings, 1918	Presented
1620	NHMUK PI P 9117	1	hand specimen				Lithistida Schmidt, 1870		Branscombe, Seaton, Devon, England, United Kingdom	Cretaceous, Cenomanian, Gritty Limestone	HINDE, Dr. George Jennings, 1918	Presented
1621	NHMUK PI P 9112	1	hand specimen				Lithistida Schmidt, 1870		Eastbourne, Sussex, England, United Kingdom	Cretaceous, Cenomanian, Chloritic Marl	HINDE, Dr. George Jennings, 1918	Presented
1622	NHMUK PI S 4694	1	hand specimen	Spiculiferous chert			Lithistida Schmidt, 1870		Charnmouth, Dorset, England, United Kingdom	Cretaceous, Upper Greensand	LANG, William D., 6 May 1938	Presented
1623	NHMUK PI S 4695	1	hand specimen	Spiculiferous chert			Lithistida Schmidt, 1870		Charnmouth, Dorset, England, United Kingdom	Cretaceous, Upper Greensand	LANG, William D., 6 May 1938	Presented
1624	NHMUK PI S 4698	1	hand specimen	Spiculiferous chert			Lithistida Schmidt, 1870		Haddon Hill, Dorset, England, United Kingdom	Cretaceous, Upper Greensand	LANG, William D., 6 May 1938	Presented
1625	NHMUK PI S 8256	1	hand specimen				Lithistida Schmidt, 1870		St. Lawrence, Isle of Wight, England United Kingdom	Cretaceous, Upper Greensand	FORD, R. L. E., Nov 1959	Presented
1626	NHMUK PI S 8257	1	hand specimen				Lithistida Schmidt, 1870		St. Lawrence, Isle of Wight, England United Kingdom	Cretaceous, Upper Greensand	FORD, R. L. E., Nov 1959	Presented
1627	NHMUK PI S 7655	4	hand specimen				Lithistida Schmidt, 1870		Near Grays Farm, Westerham, Kent, England, United Kingdom	Cretaceous, Chalk Group, Upper Chalk, Turonian, H. planus zone	HAMPTON, J. S., July 1955
1628	NHMUK PI S 7934	1	hand specimen				Lithistida Schmidt, 1870		Chatham, Kent, England, United Kingdom	Cretaceous, Chalk Group, Upper Chalk, Senonian, M. coranguinum zone	ROWE, Arthur Walter, Nov 1926	Purchased
1629	NHMUK PI S 6997	1	hand specimen				Lithistida Schmidt, 1870		Kiplingcotes, Yorkshire, England, United Kingdom	Cretaceous, Chalk Group, Upper Chalk, Turonian, H. planus zone	OAKLEY, Dr. K. P., Dec 1950	Donated
1630	NHMUK PI S 6996	1	hand specimen				Lithistida Schmidt, 1870		Kiplingcotes, Yorkshire, England, United Kingdom	Cretaceous, Chalk Group, Upper Chalk, Turonian, H. planus zone	OAKLEY, Dr. K. P., Dec 1950	Donated
1631	NHMUK PI P 3045	2	hand specimen				Lithistida Schmidt, 1870		South of England	Cretaceous, Chalk Group, Upper Chalk	BOWERBANK, James Scott, 1865	Purchased
1632	NHMUK PI S 9060	1	hand specimen				Lithistida Schmidt, 1870		Norwich, Norfolk, England, United Kingdom	Cretaceous, Chalk Group, Upper Chalk, Senonian	BOWERBANK, James Scott, 1865	Purchased
1633	NHMUK PI S 9285	3	hand specimen				Lithistida Schmidt, 1870		Wilmington, Devon, England, United Kingdom	Cretaceous, Cenomanian, Wilmington Sands	GREENAWAY, W.	Presented
1634	NHMUK PI S 7196	1	hand specimen	Spicular rock			Lithistida Schmidt, 1870		Ventnor, Isle of Wight, England, United Kingdom	Cretaceous, Upper Greensand	HINDE, Dr. George Jennings, 1918	Presented
1635	NHMUK PI OR 54888	1	hand specimen				Lithistida Schmidt, 1870		Wiltshire, England, United Kingdom	Cretaceous, Chalk Group	LUDLAM, Henry, July 1871	Presented
1636	NHMUK PI P 5051	2	hand specimen				Lithistida Schmidt, 1870		Driffield, Yorkshire, England, United Kingdom	Cretaceous, Chalk Group	CHADWICK, S., Jul 1895	Purchased
1637	NHMUK PI P 5052	2	hand specimen				Lithistida Schmidt, 1870		Driffield, Yorkshire, England, United Kingdom	Cretaceous, Chalk Group	CHADWICK, S., Jul 1895	Purchased
1638	NHMUK PI S 6171	1	hand specimen	Spicular rock			Lithistida Schmidt, 1870		Haldon Hills, Devon, England, United Kingdom	Cretaceous, Upper Greensand	CARTER, Henry John Collection	Donated
1639	NHMUK PI S 9090 (1)	8	hand specimen				Lithistida Schmidt, 1870		Wilmington, Devon, England, United Kingdom	Cretaceous, Cenomanian	ELLIOTT, G. F.	Purchased
1640	NHMUK PI S 9090 (2)	1	thin section				Lithistida Schmidt, 1870		Wilmington, Devon, England, United Kingdom	Cretaceous, Cenomanian	ELLIOTT, G. F.	Purchased
1641	NHMUK PI S 9090 (3)	1	thin section				Lithistida Schmidt, 1870		Wilmington, Devon, England, United Kingdom	Cretaceous, Cenomanian	ELLIOTT, G. F.	Purchased
1642	NHMUK PI S 9090 (4)	1	thin section				Lithistida Schmidt, 1870		Wilmington, Devon, England, United Kingdom	Cretaceous, Cenomanian	ELLIOTT, G. F.	Purchased
1643	NHMUK PI S 9090 (5)	1	thin section				Lithistida Schmidt, 1870		Wilmington, Devon, England, United Kingdom	Cretaceous, Cenomanian	ELLIOTT, G. F.	Purchased
1644	NHMUK PI S 9091 (1)	1	hand specimen				Lithistida Schmidt, 1870		Wilmington, Devon, England, United Kingdom	Cretaceous, Cenomanian	ELLIOTT, G. F.	Purchased
1645	NHMUK PI S 9091 (2)	1	thin section				Lithistida Schmidt, 1870		Wilmington, Devon, England, United Kingdom	Cretaceous, Cenomanian	ELLIOTT, G. F.	Purchased
1646	NHMUK PI S 9091 (3)	1	thin section				Lithistida Schmidt, 1870		Wilmington, Devon, England, United Kingdom	Cretaceous, Cenomanian	ELLIOTT, G. F.	Purchased
1647	NHMUK PI S 9091 (4)	1	thin section				Lithistida Schmidt, 1870		Wilmington, Devon, England, United Kingdom	Cretaceous, Cenomanian	ELLIOTT, G. F.	Purchased
1648	NHMUK PI S 6844	1	hand specimen				Lithistida Schmidt, 1870		Quarry near Ightham, Kent, England, United Kingdom	Cretaceous, Lower Greensand, Kentish Rag	CARNECK, J. N., Jun 1950
1649	NHMUK PI S 5453	1	hand specimen	Spiculiferous chert			Lithistida Schmidt, 1870		Charnmouth, Dorset, England, United Kingdom	Cretaceous, Upper Greensand	LANG, William D., May 1947	Presented
1650	NHMUK PI S 4692	1	hand specimen	Spiculiferous chert			Lithistida Schmidt, 1870		Charnmouth, Dorset, England, United Kingdom	Cretaceous, Upper Greensand	LANG, William D., May 1947	Presented
1651	NHMUK PI S 4693	1	hand specimen	Spiculiferous chert			Lithistida Schmidt, 1870		Charnmouth, Dorset, England, United Kingdom	Cretaceous, Upper Greensand	LANG, William D., May 1947	Presented
1652	NHMUK PI S 6557	1	hand specimen				Lithistida Schmidt, 1870		Duncombe, Sidmouth, Devon, England, United Kingdom	Cretaceous, Upper Greensand	HINDE, Dr. George Jennings, 1918	Presented
1653	NHMUK PI S 8339	1	hand specimen				Lithistida Schmidt, 1870		Playhatch, Berkshire, England, United Kingdom	Cretaceous, Chalk Group, Upper Chalk	RAE, A., Mar 1963
1654	NHMUK PI S 5454	1	hand specimen	Spiculiferous chert			Lithistida Schmidt, 1870		Axminster Road near Charnmouth, Dorset, England, United Kingdom	Cretaceous, Upper Greensand	LANG, William D., May 1947	Presented
1655	NHMUK PI S 4696	1	hand specimen	Spiculiferous chert			Lithistida Schmidt, 1870		Charnmouth, Dorset, England, United Kingdom	Cretaceous, Upper Greensand	LANG, William D., 6 May 1938	Presented
1656	NHMUK PI S 7192	1	hand specimen	Spicular rock			Lithistida Schmidt, 1870		Farnham, Surrey, England, United Kingdom	Cretaceous, Upper Greensand	HINDE, Dr. George Jennings, 1918	Presented
1657	NHMUK PI S 7193	1	hand specimen	Spicular rock			Lithistida Schmidt, 1870		Farnham, Surrey, England, United Kingdom	Cretaceous, Upper Greensand	HINDE, Dr. George Jennings, 1918	Presented
1658	NHMUK PI S 4861	1	hand specimen	Spiculiferous chert			Lithistida Schmidt, 1870		Man-of-War Cove, Dorset, England, United Kingdom	Cretaceous, Upper Greensand	OVEY, C. D., July 1938	Donated
1659	NHMUK PI S 4350	1	hand specimen	Spiculiferous chert			Lithistida Schmidt, 1870		Haddon Hill, Dorset, England, United Kingdom	Cretaceous, Upper Greensand	THOMAS, H. D., 14 Jul 1936	Presented
1660	NHMUK PI S 7698	1	hand specimen				Doryderma (Brochodora) roemeri Hinde, 1884		Gillingham, Kent, England, United Kingdom	Cretaceous, Chalk Group, Upper Chalk, Senonian, M. coranguinum zone	ROWE, Arthur Walter, Nov 1926	Purchased
1661	NHMUK PI P 1258 (1)	1	hand specimen				Doryderma (Brochodora) roemeri Hinde, 1884		Wiltshire, England, United Kingdom	Cretaceous, Chalk Group, Upper Chalk	History unrecorded
1662	NHMUK PI S 8844	1	hand specimen				Doryderma (Brochodora) roemeri Hinde, 1884		Harpsden, Oxfordshire, England, United Kingdom	Cretaceous, Chalk Group	SEALY, D. L. F., Mar 1968	Donated
1663	NHMUK PI S 8845	1	hand specimen				Doryderma (Brochodora) roemeri Hinde, 1884		Harpsden, Oxfordshire, England, United Kingdom	Cretaceous, Chalk Group	SEALY, D. L. F., Mar 1968	Donated
1664	NHMUK PI S 7774	3	hand specimen				Doryderma (Brochodora) roemeri Hinde, 1884		Highport, Ventnor, Isle of Wight, England, United Kingdom	Cretaceous, Chalk Group, Upper Chalk	ROWE, Arthur Walter, Nov 1926	Purchased
1665	NHMUK PI S 7781	1	hand specimen				Doryderma (Brochodora) roemeri Hinde, 1884		Sandown Bay, Isle of Wight, England, United Kingdom	Cretaceous, Chalk Group, Upper Chalk	ROWE, Arthur Walter, Nov 1926	Purchased
1666	NHMUK PI S 8307	1	hand specimen				Doryderma (Brochodora) roemeri Hinde, 1884		Ranmore Common, Surrey, England, United Kingdom	Cretaceous, Chalk Group	COVINGTON, R., Aug 1961
1667	NHMUK PI S 10010	1	hand specimen				Doryderma (Brochodora) roemeri Hinde, 1884		Pit 3, Upper Woodford, Wiltshire, England, United Kingdom	Cretaceous, Chalk Group, Upper Chalk, Senonian, M. coranguinum zone	WRIGHT, Claud William, Collection [1933]	Presented
1668	NHMUK PI S 10011	1	hand specimen				Doryderma (Brochodora) roemeri Hinde, 1884		Pit 3, Upper Woodford, Wiltshire, England, United Kingdom	Cretaceous, Chalk Group, Upper Chalk, Senonian, M. coranguinum zone	WRIGHT, Claud William, Collection [1933]	Presented
1669	NHMUK PI S 10012	1	hand specimen				Doryderma (Brochodora) roemeri Hinde, 1884		Pit 3, Upper Woodford, Wiltshire, England, United Kingdom	Cretaceous, Chalk Group, Upper Chalk, Senonian, M. coranguinum zone	WRIGHT, Claud William, Collection [1933]	Presented
1670	NHMUK PI S 10013	1	hand specimen				Doryderma (Brochodora) roemeri Hinde, 1884		Pit 3, Upper Woodford, Wiltshire, England, United Kingdom	Cretaceous, Chalk Group, Upper Chalk, Senonian, M. coranguinum zone	WRIGHT, Claud William, Collection [1933]	Presented
1671	NHMUK PI S 10014	1	hand specimen				Doryderma (Brochodora) roemeri Hinde, 1884		Pit 3, Upper Woodford, Wiltshire, England, United Kingdom	Cretaceous, Chalk Group, Upper Chalk, Senonian, M. coranguinum zone	WRIGHT, Claud William, Collection [1933]	Presented
1672	NHMUK PI S 10015	1	hand specimen				Doryderma (Brochodora) roemeri Hinde, 1884		Pit 3, Upper Woodford, Wiltshire, England, United Kingdom	Cretaceous, Chalk Group, Upper Chalk, Senonian, M. coranguinum zone	WRIGHT, Claud William, Collection [1933]	Presented
1673	NHMUK PI S 10016	1	hand specimen				Doryderma (Brochodora) roemeri Hinde, 1884		Pit 3, Upper Woodford, Wiltshire, England, United Kingdom	Cretaceous, Chalk Group, Upper Chalk, Senonian, M. coranguinum zone	WRIGHT, Claud William, Collection [1933]	Presented
1674	NHMUK PI S 10017	1	hand specimen				Doryderma (Brochodora) roemeri Hinde, 1884		Pit 3, Upper Woodford, Wiltshire, England, United Kingdom	Cretaceous, Chalk Group, Upper Chalk, Senonian, M. coranguinum zone	WRIGHT, Claud William, Collection [1933]	Presented
[truncated: 1,953 more rows]
